# Supplementary material
Source: PubMed Central journal article supplement (PMC10543653)

# Supporting Information

## Electrochemical Synthesis of Glycosyl Fluorides Using Sulfur(VI) Hexafluoride as the Fluorinating Agent

Sungjin Kim, Pavel Nagorny\*

Department of Chemistry, University of Michigan, Ann Arbor, Michigan 48109, United States.

\*nagorny@umich.edu

### Table of contents

|                                                                                      |        |
|--------------------------------------------------------------------------------------|--------|
| I. General Information.....                                                          | 2-3    |
| II. Optimization                                                                     |        |
| a. Reaction condition optimization.....                                              | 4-7    |
| III. Experimental Procedures and Characterization Data.....                          | 8-55   |
| a. Synthesis of substrates ( <b>1a-q</b> ).....                                      | 8-30   |
| b. List of components for experimental setup.....                                    | 31     |
| c. Synthesis of glycosyl fluorides ( <b>2a-q</b> ).....                              | 32-51  |
| d. Initial and final $\alpha$ : $\beta$ ratios for <b>1a-q</b> and <b>2a-q</b> ..... | 52     |
| e. Comparison with DAST method.....                                                  | 53     |
| f. Large scale batch synthesis.....                                                  | 54-55  |
| IV. Cyclic Voltammetry Studies.....                                                  | 56-62  |
| a. Identifying half reduction potential of SF <sub>6</sub> .....                     | 56     |
| b. SF <sub>6</sub> at multiple scan rates.....                                       | 57-58  |
| c. SF <sub>6</sub> + NEt <sub>3</sub> at multiple scan rates.....                    | 59-60  |
| d. SF <sub>6</sub> + glycoside at multiple scan rates.....                           | 61     |
| e. SF <sub>6</sub> + glycoside +NEt <sub>3</sub> at multiple scan rate.....          | 62     |
| V. Studies of the Reaction Mechanism.....                                            | 63-65  |
| a. Electric current on/off experiment.....                                           | 63     |
| b. Control experiment with ZnF <sub>2</sub> .....                                    | 64     |
| c. PPh <sub>3</sub> quench experiment.....                                           | 64-67  |
| VI. NMR Spectra.....                                                                 | 68-176 |

## I. General Information

### Methods and Reagents:

Unless otherwise stated, all reagents were purchased from commercial suppliers and used without further purification. All reactions were carried out in flame- or oven-dried glassware with magnetic stirring. Reactions were cooled using external cooling baths: ice water (0 °C). Deionized water was used in the preparation of all aqueous solutions and for all aqueous extractions. Solvents used for extraction and chromatography were ACS or HPLC grade. Purification of reaction mixtures was performed by flash column chromatography (FCC) using SiliCycle SilicaFlash P60 (230-400 mesh). Diastereomeric ratios were determined by <sup>1</sup>H NMR or <sup>19</sup>F NMR analysis.

### Instrumentation:

<sup>1</sup>H NMR spectra were recorded on Varian vnmrs 700 (700 MHz), Varian vnmrs 600 (600 MHz), or Varian vnmrs 500 (500 MHz) spectrometers and chemical shifts (δ) are reported in parts per million (ppm) with solvent resonance as the internal standard (CDCl<sub>3</sub> at δ 7.26, CD<sub>3</sub>CN at δ 1.94). Data are reported as (br = broad, s = singlet, d = doublet, t = triplet, q = quartet, m = multiplet; coupling constant(s) in Hz; integration). Proton-decoupled <sup>13</sup>C NMR spectra were recorded on Varian vnmrs 700 (700 MHz), Varian vnmrs 600 (600 MHz), or Varian vnmrs 500 (500 MHz) spectrometers and chemical shifts (δ) are reported in ppm with solvent resonance as the internal standard (CDCl<sub>3</sub> at δ 77.0, CD<sub>3</sub>CN at δ 118.7). <sup>19</sup>F NMR spectra were recorded on Varian vnmrs 600 (600 MHz), Varian vnmrs 500 (500 MHz), or Varian vnmrs 400 (400 MHz) spectrometers and chemical shifts (δ) are reported in parts per million (ppm) and are referenced to CFC<sub>3</sub> (δ 0.0). High resolution mass spectra (HRMS) were recorded on Micromass AutoSpec Ultima or VG (Micromass) 70-250-S Magnetic sector mass spectrometers in the University of Michigan mass spectrometry laboratory. Infrared (IR) spectra were recorded as thin films on NaCl plates on a Perkin Elmer Spectrum BX FT-IR spectrometer. Absorption peaks were reported in wavenumbers (cm<sup>-1</sup>).

### Information of the DC power supply equipment:

- a. Tekpower TP3005P
  - Output Voltage: 0-30 V
  - Output Current: 0-5 A
  - Setup Resolution: 10 mV / 1 mA
  - Setup Accuracy: ≤ 0.5 % + 20 mV / ≤ 0.5 % + 10 mA

### Assignment of Stereochemistry:

Stereochemistry of glycosyl fluoride products (except mannose and rhamnose) are characterized by:

1. One-bond C-F coupling of anomeric carbon in H-coupled  $^{13}\text{C}$  NMR;  $\alpha$ -glycosyl fluoride,  $^1J_{\text{C-F}} = 224 - 228$  Hz and  $\beta$ -glycosyl fluoride,  $^1J_{\text{C-F}} = 213 - 219$  Hz.
2. Three-bond H-H coupling between anomeric hydrogen and C2-hydrogen in  $^1\text{H}$  NMR;  $\alpha$ -glycosyl fluoride,  $^3J_{\text{H-H}} = < 3$  Hz, and  $\beta$ -glycosyl fluoride,  $^3J_{\text{H-H}} = 5.6 - 7.8$  Hz.

For D-mannosyl fluorides and L-rhamnosyl fluorides:

1. One-bond C-F coupling of anomeric carbon in H-coupled  $^{13}\text{C}$  NMR;  $\alpha$ -anomers,  $^1J_{\text{C-F}} = 221 - 224$  Hz and  $\beta$ -anomers,  $^1J_{\text{C-F}} = 213-218$  Hz

When previously reported NMR spectra were available, the stereochemistry of the product was confirmed again by comparing with them.

## II. Optimization

### a. Reaction Condition Optimization

Table S1. Solvent Screening

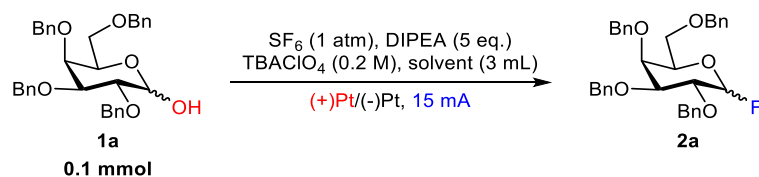

| Entry | Solvent | Reaction Time | <sup>19</sup> F NMR %Yield | Comments                                                                                                                         |
|-------|---------|---------------|----------------------------|----------------------------------------------------------------------------------------------------------------------------------|
| 1     | MeCN    | 2 h 30 min    | 28%                        | 3 eq. of DIPEA instead of 5 eq.                                                                                                  |
| 2     | DCE     | 1h            | 32%                        | -                                                                                                                                |
| 3     | DCM     | 20 min        | 16%                        | Cathode was coated with brown chunks                                                                                             |
| 4     | DMF     | 1h            | 0%                         | -                                                                                                                                |
| 5     | THF     | 45 min        | 35%                        | <b><sup>1</sup>H NMR shows 67% consumption of starting material</b><br><b><sup>19</sup>F NMR shows fluorinated side products</b> |

Table S2. Electrode Screening

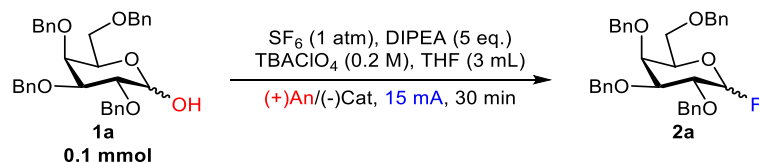

| Entry | (+)An/(-)Cat | Comment                                        | Current Density        | Isolated Yield                   | BRSM <sup>a</sup> |
|-------|--------------|------------------------------------------------|------------------------|----------------------------------|-------------------|
| 1     | (+)Zn/(-)Pt  | Worked up ~1h after the reaction was stopped   | 56 mA/cm <sup>2</sup>  | 94% (51 mg)<br>α : β = 1 : 1.3   | 95%               |
| 2     | (+)Zn/(-)Pt  | Worked up right after the reaction was stopped | 56 mA/cm <sup>2</sup>  | 90% (48.9 mg)                    | -                 |
| 3     | (+)Zn/(-)Pt  | reaction time = 20min                          | 56 mA/cm <sup>2</sup>  | 80% (43.5 mg)                    | 93.2%             |
| 4     | (+)Zn/(-)Sn  | soldering wire (98% Sn / 2% Ag and Cu)         | 13 mA/cm <sup>2</sup>  | 84% (45.6 mg)<br>α : β = 1 : 1.5 | -                 |
| 5     | (+)Zn/(-)C   | -                                              | 3.3 mA/cm <sup>2</sup> | 22% (11.7 mg)<br>α : β = 1 : 1.3 | -                 |
| 6     | (+)Mg/(-)Sn  | Mg plate (from Amazon) + soldering wire        | 13 mA/cm <sup>2</sup>  | 66% (36 mg)<br>α : β = 1 : 1.2   | -                 |

<sup>a</sup>Yield based on the recovered starting material.



**Table S3. DIPEA Loading and Reaction Time Screening**

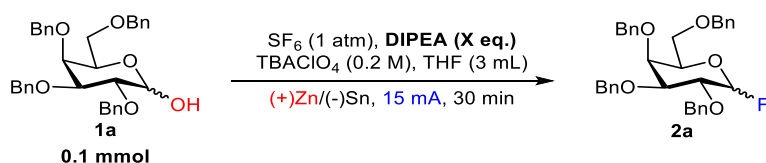

| Entry    | DIPEA (X eq.) | Deviation                                              | Isolated Yield                                              |
|----------|---------------|--------------------------------------------------------|-------------------------------------------------------------|
| 1        | 5             | -                                                      | 84% (43.5 mg, $\alpha : \beta = 1 : 1.5$ )                  |
| 2        | 3             | -                                                      | 77% (42 mg, $\alpha : \beta = 1 : 1.4$ )                    |
| 3        | 3             | New Zn electrode                                       | 77.6% (42.1 mg, $\alpha : \beta = 1 : 1.4$ )                |
| 4        | 3             | 0.6 mm soldering wire                                  | 81% (43.7 mg, $\alpha : \beta = 1 : 1.6$ )                  |
| 5        | 3             | 0.6 mm soldering wire, 45 min                          | 86% (46.9 mg, $\alpha : \beta = 1 : 1.5$ )                  |
| 6        | 3             | 0.6 mm soldering wire, 1 h                             | 86% (46.7 mg, $\alpha : \beta = 1 : 1.4$ )                  |
| 7        | 3             | Reaction time = 45 min                                 | 88% (47.6 mg, $\alpha : \beta = 1 : 1.3$ )                  |
| <b>8</b> | <b>3</b>      | <b>Reaction time = 1 h</b>                             | <b>90% (49 mg, <math>\alpha : \beta = 1 : 1.3</math>)</b>   |
| 9        | 1             | New Zn electrode                                       | 55% (30.1 mg, $\alpha : \beta = 1 : 1.2$ )                  |
| 10       | 1             | Reaction time = 1 h                                    | 73% (39.5 mg, $\alpha : \beta = 1 : 1.3$ )                  |
| 11       | 1             | Reaction time = 1.5 h                                  | 67% (36.3 mg, $\alpha : \beta = 1 : 1.2$ )<br>Decomposition |
| 12       | 0             | Reaction time = 16 min<br>(Voltage went above 30V)     | 57% (31 mg, $\alpha : \beta = 1 : 1.2$ )                    |
| 13       | 0             | New Zn electrode<br>15 mA 15.4V $\rightarrow$ 8 mA 30V | 67% (36.1 mg, $\alpha : \beta = 1 : 1.2$ )                  |

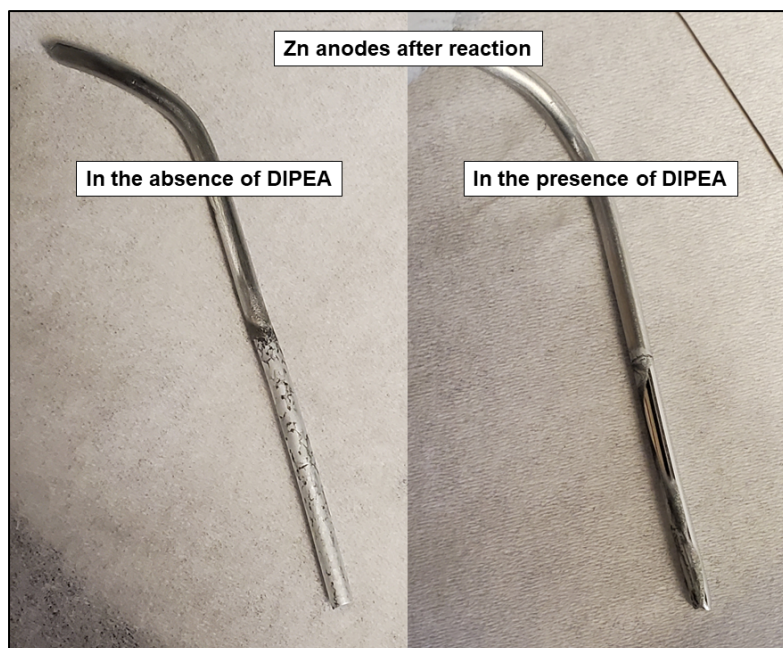

**Figure S1.** Amine base prevents the electrode passivation.

**Table S4. Electrolyte Screening**

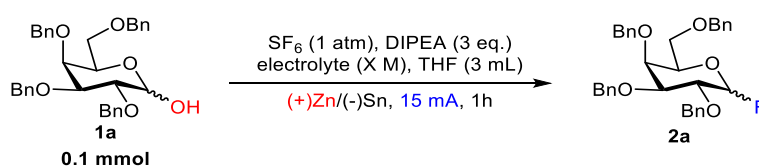

| Entry | Electrolyte         | Concentration | Monitored V <sup>a</sup> | Comment                                 | Yield (%)                        |
|-------|---------------------|---------------|--------------------------|-----------------------------------------|----------------------------------|
| 1     | TBAClO <sub>4</sub> | 0.2 M         | 15-16 V                  | -                                       | 90% (49 mg)<br>α : β = 1 : 1.3   |
| 2     | TBAClO <sub>4</sub> | 0.15 M        | 22-23 V                  | -                                       | 93% (50.5 mg)<br>α : β = 1 : 1.3 |
| 3     | TBAClO <sub>4</sub> | 0.1 M         | 30 V<br>(13-14 mA)       | -                                       | 74% (40 mg)<br>α : β = 1 : 1.3   |
| 4     | TBAOAc              | 0.2 M         | 30 V (0 mA)              | electrolytes not dissolving             | -                                |
| 5     | TBAPF <sub>6</sub>  | 0.2 M         | 9-10 V                   | electrolytes extracted in organic layer | 75% (40.9 mg)<br>α : β = 1 : 1.4 |

<sup>a</sup>Voltage applied to the electrolytic cell by DC power supply.

**Table S5. Amine Base Screening**

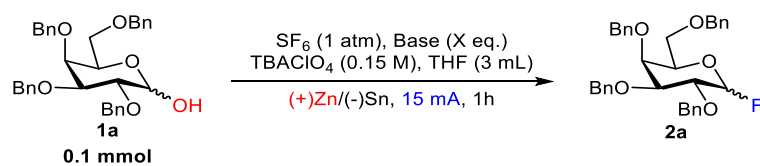

| Entry | Base     | Equiv. (X) | Comment                                  | Yield (%)                                 |
|-------|----------|------------|------------------------------------------|-------------------------------------------|
| 1     | DIPEA    | 3          | -                                        | 93% (50.5 mg), $\alpha : \beta = 1 : 1.3$ |
| 2     | TEA      | 3          | 22 V $\rightarrow$ 30V (13 mA)           | 93% (50.2 mg), $\alpha : \beta = 1 : 1.4$ |
| 3     | Pyridine | 3          | 30 V / 14 mA $\rightarrow$ 30 V / 1-2 mA | Crude NMR shows products and byproduct    |

**Table S6. TEA vs DIPEA**

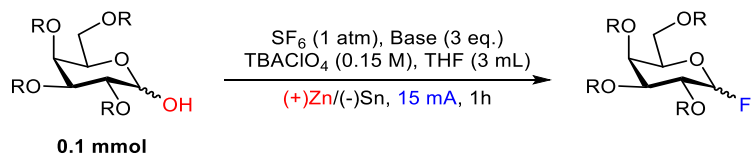

| Base  | R = Bn (1a)                                | R = Ac (1k)                                | R = PMB (1h)                               |
|-------|--------------------------------------------|--------------------------------------------|--------------------------------------------|
| TEA   | 93% (50.2 mg, $\alpha : \beta = 1 : 1.4$ ) | 69% (24.3 mg, $\alpha : \beta = 1.6 : 1$ ) | 97% (64.1 mg, $\alpha : \beta = 1 : 1.2$ ) |
| DIPEA | 93% (50.5 mg, $\alpha : \beta = 1 : 1.3$ ) | 59% (20.8 mg, $\alpha : \beta = 1.4 : 1$ ) | 87% (57.8 mg, $\alpha : \beta = 1 : 1.3$ ) |

### III. Experimental Procedure

#### a. Synthesis of Substrates

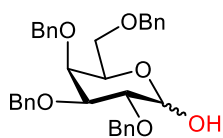

**1a**

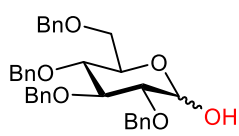

**1b**

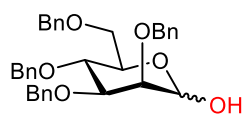

**1c**

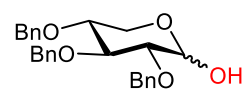

**1d**

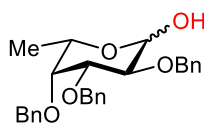

**1e**

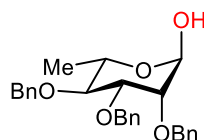

**1f**

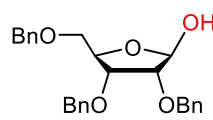

**1g**

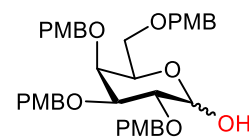

**1h**

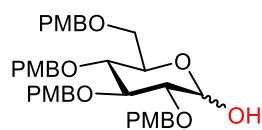

**1i**

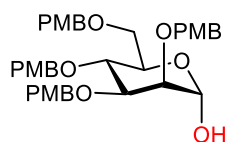

**1j**

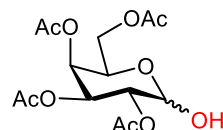

**1k**

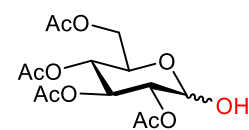

**1l**

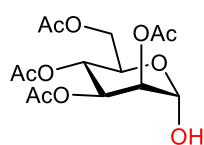

**1m**

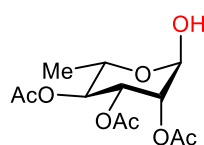

**1n**

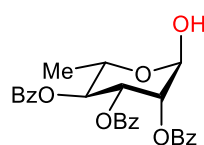

**1o**

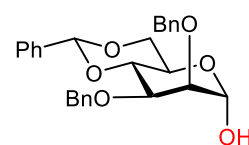

**1p**

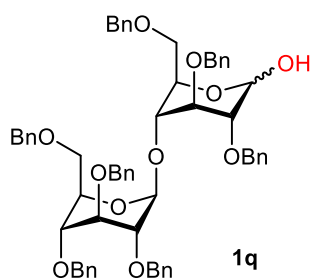

**1q**

### Preparation of 4-Methoxybenzyl bromide (S1)

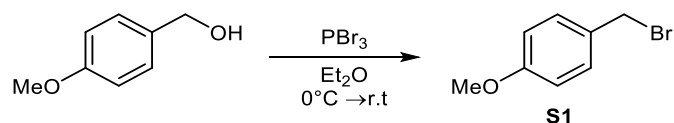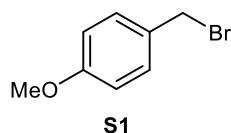

### 4-Methoxybenzyl bromide (S1)

In a dry round-bottom flask, 4-methoxybenzyl alcohol (112 mmol, 2.8 equiv.) was dissolved with Et<sub>2</sub>O (40 mL). After cooling the mixture by placing the flask in an ice bath, PBr<sub>3</sub> (40 mmol, 1 equiv.) was added dropwise into the reaction mixture. The reaction was stirred for 5 hours while it was gradually warmed up to room temperature and quenched by adding aqueous NaCl solution (50 mL). The crude mixture was washed with aqueous NaHCO<sub>3</sub> (saturated, 50 mL) and then aqueous NaCl solution (saturated, 50 mL). The organic layer is concentrated *in vacuo* to yield 4-methoxybenzyl bromide S1 as colorless liquid. The product was confirmed by <sup>1</sup>H NMR and was subjected to the next synthesis without further purification. <sup>1</sup>H NMR (700 MHz, Chloroform-*d*) δ 7.33 (d, *J* = 8.6 Hz, 2H), 6.87 (d, *J* = 8.6 Hz, 2H), 4.51 (s, 2H), 3.81 (s, 3H).

### Preparation of 2,3,4,6-tetrakis-*O*-(phenylmethyl)-D-galactopyranoside (1a)

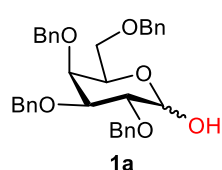

Purchased from CarboSynth. Lot#: MT040861801.

### Preparation of 2,3,4,6-Tetrakis-*O*-(phenylmethyl)-D-glucopyranoside (1b)

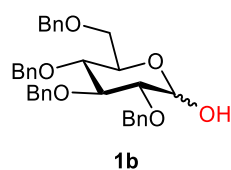

Purchased from CarboSynth. Batch#: MT066911502.

## Preparation of 2,3,4,6-tetrakis-*O*-(phenylmethyl)-*D*-Mannopyranoside (1c)

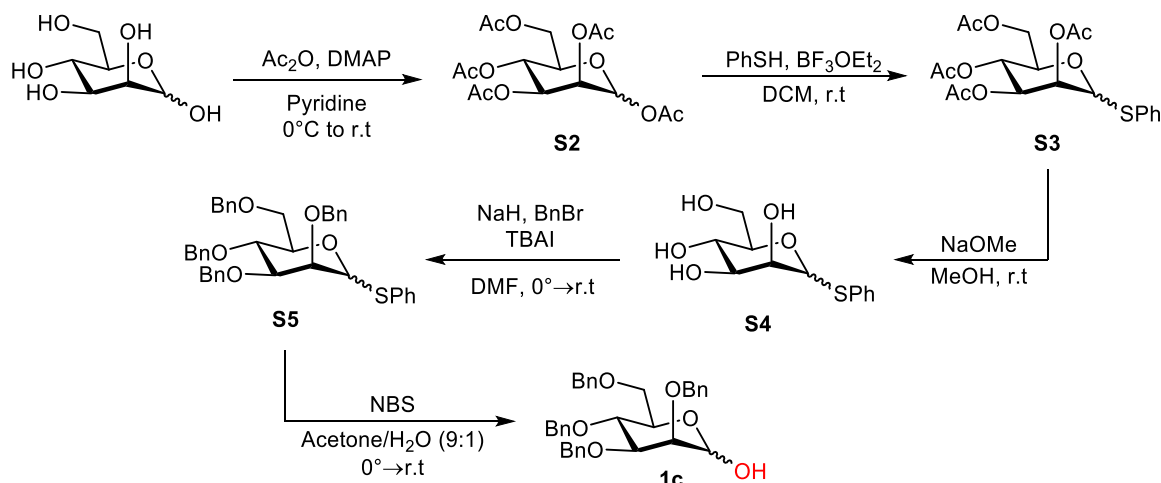

### 1,2,3,4,6-Penta-*O*-acetyl-*D*-mannopyranoside (S2)

In an oven dried round-bottom flask, *D*-mannose (27.8 mmol, 1.0 equiv.) and pyridine (40 mL) were added. The reaction mixture was stirred until the solution became homogeneous, and then the round-bottom flask was placed in an ice-bath. After the reaction was cooled down, acetic anhydride (166.8 mmol, 6.0 equiv.) and DMAP (1.35 mmol, 0.05 equiv.) were added in that order. The reaction was stirred overnight while it was gradually warmed up to the room temperature. The reaction was quenched by diluting with DCM (200 mL) followed by washing with 1N HCl (200 mL x 2), water (200 mL x 2), and then brine (200 mL). Extracted organic layer was dried with Na<sub>2</sub>SO<sub>4</sub> and was concentrated *in vacuo* to yield 1,2,3,4,6-penta-*O*-acetyl-*D*-mannopyranoside **S2**. The product was subjected to the next synthesis without further purification. <sup>1</sup>H NMR (500 MHz, CDCl<sub>3</sub>) δ 6.09 (d, *J* = 1.9 Hz, 1H (α-C<sub>1</sub>-H)), 5.35 (d, *J* = 6.2 Hz, 2H), 5.30 (s, 1H), 5.27 – 5.26 (m, 1H), 4.29 (dd, *J* = 12.4, 4.9 Hz, 1H), 4.11 (dd, *J* = 12.4, 2.5 Hz, 1H), 4.06 (q, *J* = 6.9, 6.2 Hz, 1H), 2.18 (s, 3H), 2.17 (s, 3H), 2.10 (s, 3H), 2.06 (s, 3H), 2.01 (s, 3H).

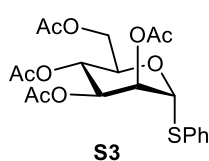

### Phenyl 2,3,4,6-tetra-*O*-acetyl-1-thio-*α*-*D*-mannopyranoside (S3)

In an oven dried round-bottom flask, **S2** (27.8 mmol, 1.0 equiv.) and DCM (30 mL) were added. After the addition of thiophenol (41.7 mmol, 1.5 equiv.), the round-bottom flask was sealed with a rubber-septum cap and purged with nitrogen gas. The reaction mixture was stirred until it became homogeneous, and then BF<sub>3</sub>·OEt<sub>2</sub> (83.4 mmol, 3.0 equiv.) was slowly injected into the flask. The reaction was stirred overnight at room temperature and quenched with aqueous NaHCO<sub>3</sub> (saturated, 50 mL). After extracting the mixture with DCM (100mL x 3), the combined organic layer was dried with Na<sub>2</sub>SO<sub>4</sub> and concentrated *in vacuo*. The concentrated crude mixture was subjected to FCC (SiO<sub>2</sub>, 20% EtOAc in hexane → 40% EtOAc in hexane) to afford phenyl 2,3,4,6-tetra-*O*-acetyl-1-thio-*D*-mannopyranoside **S3**.

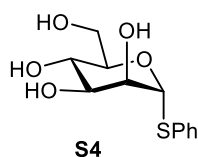

#### Phenyl 1-thio- $\alpha$ -D-mannopyranoside (**S4**)

A dry round-bottom flask was filled with **S3** (26.5 mmol, 1.0 equiv.) and anhydrous methanol (50 mL). After the reaction mixture became homogeneous, a chip of sodium metal (2.7 mmol, 0.1 equiv.) was added. The reaction was stirred overnight at room temperature, and then quenched by adding acetic acid until the pH of the reaction became neutral. The crude mixture was concentrated *in vacuo* to yield **S4** as yellowish white solid. The product was subjected to the next synthesis without further purification.

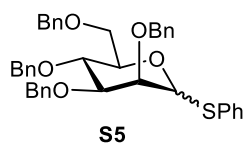

#### Phenyl 2,3,4,6-tetrakis-*O*-(phenylmethyl)-1-thio-D-mannopyranoside (**S5**)

An oven dried and nitrogen filled round-bottom flask was charged with **S4** (11 mmol, 1.0 equiv.) and DMF (30 mL). After cooling down the reaction in an ice bath, NaH (88 mmol, 8.0 equiv.) was added portion wise. Once H<sub>2</sub> gas stops generating, PMBBBr (88 mmol, 8.0 equiv.) was added followed by TBAI (0.55 mmol, 0.05 equiv.). The reaction mixture was stirred at room temperature overnight and quenched by adding water. The mixture was extracted with EtOAc (100 mL x 3), and the organic layer was dried with Na<sub>2</sub>SO<sub>4</sub> and concentrated *in vacuo*. The concentrated crude mixture was subjected to FCC (SiO<sub>2</sub>, 20% EtOAc in hexane → 30% EtOAc in hexane) to afford phenyl 2,3,4,6-tetrakis-*O*-(phenylmethyl)-1-thio-D-mannopyranoside **S5** as product

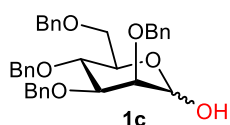

#### 2,3,4,6-Tetrakis-*O*-(phenylmethyl)-D-mannopyranoside (**1c**)

In a clean round-bottom flask, **S5** (10.9 mmol, 1.0 equiv.) was dissolved with acetone/water mixture (9:1, 55.5 mL). After cooling down the mixture in an ice bath, NBS (22.9 mmol, 2.1 equiv.) was added. The reaction was stirred overnight while it was gradually warmed up to the room temperature. Water (50 mL) was added to quench the reaction followed by the extraction with EtOAc (120 mL x 3). The combined organic layer was dried with Na<sub>2</sub>SO<sub>4</sub> and concentrated *in vacuo*. The concentrated crude mixture was subjected to FCC (SiO<sub>2</sub>, 40% EtOAc in hexane → 60% EtOAc in hexane) to afford 2,3,4,6-tetrakis-*O*-(phenylmethyl)-D-mannopyranoside **1c** as yellowish syrup.

### Preparation of 2,3,4-tris-*O*-(phenylmethyl)-*D*-xylopyranoside (**1d**)

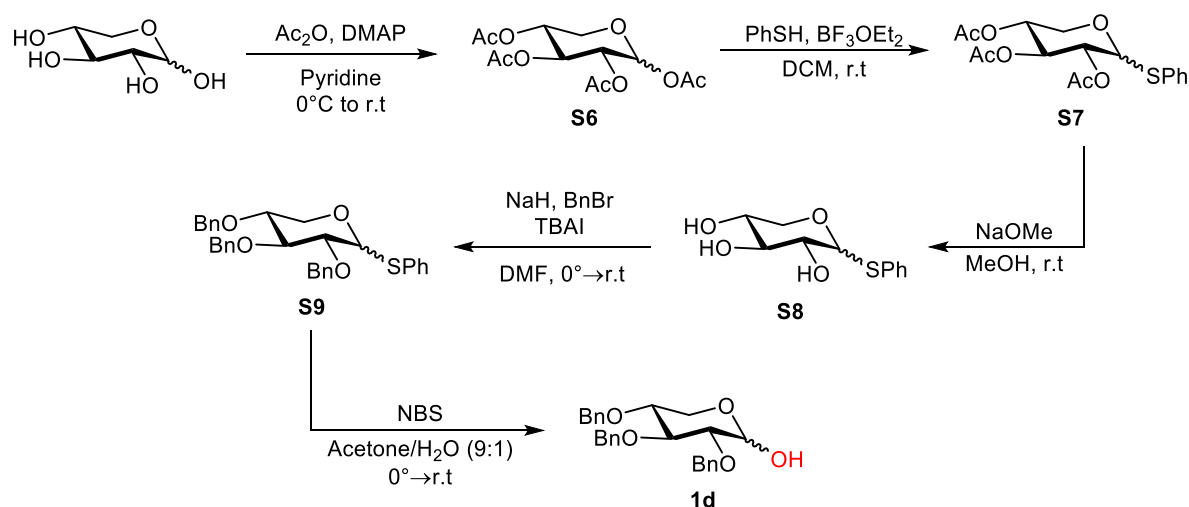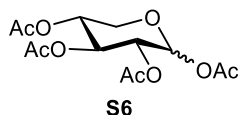

#### 1,2,3,4-Tetra-*O*-acetyl-*D*-xylopyranoside (**S6**)

In an oven dried round bottom flask, *D*-xylopyranose (13 mmol, 1.0 equiv.) and anhydrous pyridine (40 mL) were added. After stirring the mixture until it became homogeneous, the round bottom flask was placed in an ice bath and was cooled down to 0°C. Into the cooled down reaction, acetic anhydride (65 mmol, 5.0 equiv.) and DMAP (0.65 mmol, 0.05 equiv.) were added in that order. The reaction was slowly warmed up to room temperature with stirring until starting materials are gone. The mixture was then diluted with DCM (150 mL) and washed with 1N HCl solution (2 x 120 mL). The organic layer was washed with water (2 x 120 mL) and then saturated brine (2 x 120 mL). The extracted organic layer was dried with  $\text{Na}_2\text{SO}_4$  and concentrated *in vacuo*. The product 1,2,3,4-Tetra-*O*-acetyl-*D*-xylopyranose **S6** is subjected to the next synthesis without further purification.

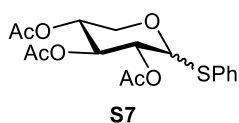

#### Phenyl 2,3,4-tri-*O*-acetyl-1-thio-*D*-xylopyranoside (**S7**)

In an oven dried round-bottom flask, **S6** (13 mmol, 1.0 equiv.) and DCM (15 mL) were added. After the addition of thiophenol (19.5 mmol, 1.5 equiv.), the round-bottom flask was sealed with a rubber-septum cap and purged with nitrogen gas. The reaction mixture was stirred until it became homogeneous, and then  $\text{BF}_3 \cdot \text{OEt}_2$  (33 mmol, 3.0 equiv.) was slowly injected into the flask. The reaction was stirred overnight at room temperature and quenched with saturated  $\text{NaHCO}_3$  solution (50 mL). After extracting the mixture with DCM (3 x 70 mL), the combined organic layer was dried with  $\text{Na}_2\text{SO}_4$  and concentrated *in vacuo*. The concentrated crude mixture was subjected to FCC ( $\text{SiO}_2$ , 20% EtOAc in hexane) to afford phenyl 2,3,4-tri-*O*-acetyl-1-thio-*D*-xylopyranose **S7** as yellowish oil.



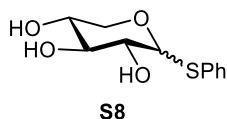

#### Phenyl 1-thio-D-xylopyranoside (S8)

A dry round-bottom flask was filled with **S7** (13 mmol, 1.0 equiv.) and anhydrous methanol (40 mL). After the reaction mixture became homogeneous, a chip of sodium metal (1.3 mmol, 0.1 equiv.) was added. The reaction was stirred overnight at room temperature, and then quenched by adding acetic acid until the pH of the reaction became neutral. The crude mixture was concentrated *in vacuo* to yield yellowish white solid. The product phenyl 1-thio-D-xylopyranose **S8** was subjected to the next synthesis without further purification.

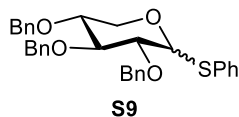

#### Phenyl 2,3,4-tris-*O*-(phenylmethyl)-1-thio-D-xylopyranoside (S9)

An oven dried and nitrogen filled round-bottom flask was charged with **S8** (13 mmol, 1.0 equiv.) and DMF (60 mL). After cooling down the reaction in an ice bath, NaH (78 mmol, 6.0 equiv.) was added portion wise. Once H<sub>2</sub> gas stops generating, BnBr (78 mmol, 6.0 equiv.) was added followed by TBAI (0.65 mmol, 0.05 equiv.). The reaction mixture was stirred at room temperature overnight and quenched by adding water. The mixture was extracted with EtOAc (3 x 100 mL), and the organic layer was dried with Na<sub>2</sub>SO<sub>4</sub> and concentrated *in vacuo*. The concentrated crude mixture was subjected to FCC (SiO<sub>2</sub>, 20% EtOAc in hexane) to afford phenyl 2,3,4-tris-*O*-(phenylmethyl)-1-thio-D-xylopyranoside **S9** as yellowish oil.

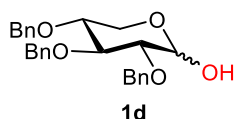

#### 2,3,4-tris-*O*-(phenylmethyl)-D-xylopyranoside (**1d**)

In a clean round-bottom flask, **S9** (13 mmol, 1 equiv.) was dissolved with acetone/water mixture (9:1, 50 mL). After cooling down the mixture in an ice bath, NBS (26 mmol, 2 equiv.) was added. The reaction was stirred overnight while it was gradually warmed up to the room temperature. Water (50 mL) was added to quench the reaction followed by the extraction with EtOAc (3 x 120 mL). The combined organic layer was dried with Na<sub>2</sub>SO<sub>4</sub> and concentrated *in vacuo*. The concentrated crude mixture was subjected to FCC (SiO<sub>2</sub>, 10% EtOAc in DCM) to afford 2,3,4-tris-*O*-(phenylmethyl)-D-xylopyranose **1d** as white solid, which is confirmed by comparing with literature NMR spectra.<sup>1</sup>

<sup>1</sup>Zhang, J.; Fu, J.; Si, W.; Wang, X.; Wang, Z.; Tang, J. *Carbohydrate Research*. **2011**, 346, 2290-2293

### Preparation of 2,3,4-tris-*O*-(phenylmethyl)-L-fucopyranoside (1e)

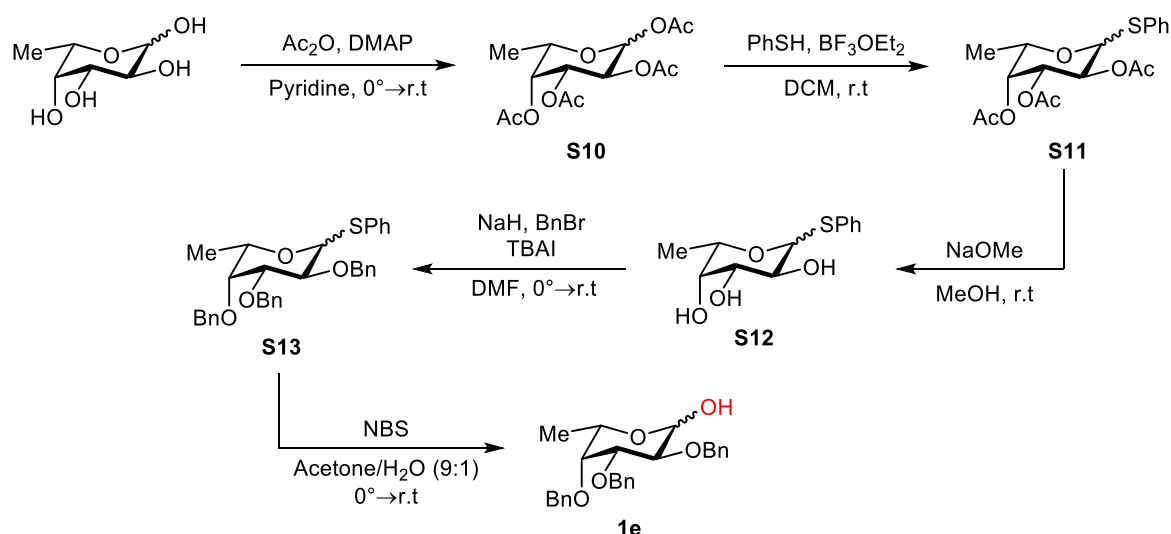

#### 1,2,3,4-Tetra-*O*-acetyl-L-fucopyranoside (S10)

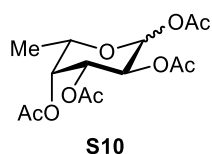

In an oven dried round bottom flask, L-fucose (3.05 mmol, 1.0 equiv.) and anhydrous pyridine (10 mL) were added. After stirring the mixture until it became homogeneous, the round bottom flask was placed in an ice bath and was cooled down to 0°C. Into the cooled down reaction, acetic anhydride (18.3 mmol, 6.0 equiv.) and DMAP (0.15 mmol, 0.05 equiv.) were added in that order. The reaction was slowly warmed up to room temperature with stirring until starting materials are gone. The mixture was then diluted with DCM (100 mL) and washed with 1N HCl solution (2 x 80 mL). The organic layer was washed with water (2 x 80 mL) and then saturated brine (2 x 80 mL). The extracted organic layer was dried with Na<sub>2</sub>SO<sub>4</sub> and concentrated *in vacuo*. The product 1,2,3,4-tetra-*O*-acetyl-L-fucopyranoside **S10** is subjected to the next synthesis without further purification.

#### Phenyl 2,3,4-tri-*O*-acetyl-1-thio-L-fucopyranoside (S11)

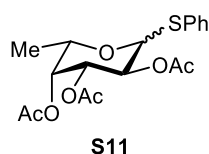

In an oven dried round bottom flask, **S8** (3.0 mmol, 1.0 equiv.) and anhydrous DCM (5 mL) were added. After stirring until the mixture became homogeneous, PhSH (4.5 mmol, 1.5 equiv.) and BF<sub>3</sub>·OEt<sub>2</sub> (9.0 mmol, 3.0 equiv.) were added. Then, the reaction mixture was stirred overnight and quenched with saturated NaHCO<sub>3</sub> solution (20 mL). The aqueous layer was extracted with DCM (3 x 35 mL) and dried with Na<sub>2</sub>SO<sub>4</sub>. The extracted organic layer was concentrated *in vacuo* and subjected to FCC (SiO<sub>2</sub>, 30% EtOAc in hexane → 50% EtOAc in hexane) to afford phenyl 2,3,4-tri-*O*-acetyl-1-thio-L-fucopyranoside **S11**.

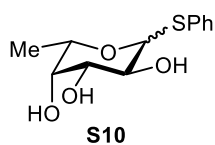

### Phenyl 1-thio-L-fucopyranoside (S12)

In an oven dried round bottom flask, **S9** (2.9 mmol, 1 equiv.) and MeOH (20 mL) were added. After stirring until the mixture became homogeneous, Na metal (0.29 mmol, 0.1 equiv.) was added and stirred at room temperature until all starting materials were consumed. Once all starting materials are gone, the reaction was neutralized with acetic acid and was concentrated *in vacuo* to afford phenyl 1-thio-L-fucopyranoside **S10** as yellowish syrup. The product was subjected to next reaction without further purification.

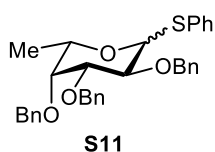

### Phenyl 2,3,4-tri-*O*-(phenylmethyl)-1-thio-L-fucopyranoside (S13)

An oven dried and nitrogen filled round-bottom flask was charged with **S10** (3.0 mmol, 1.0 equiv.) and DMF (23 mL). After cooling down the reaction in an ice bath, NaH (18 mmol, 6.0 equiv.) was added portion wise. Once H<sub>2</sub> gas stops generating, BnBr (18 mmol, 6.0 equiv.) was added followed by TBAI (0.15 mmol, 0.05 equiv.). The reaction mixture was stirred at room temperature overnight and quenched by adding water. The mixture was extracted with EtOAc (3 x 100 mL), and the organic layer was dried with Na<sub>2</sub>SO<sub>4</sub> and concentrated *in vacuo*. The concentrated crude mixture was subjected to FCC (SiO<sub>2</sub>, 20% EtOAc in hexane) to afford phenyl 2,3,4-tris-*O*-(phenylmethyl)-1-thio-D-fucopyranoside **S11** as yellowish oil.

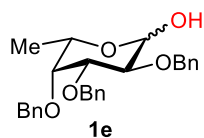

### 2,3,4-Tris-*O*-(phenylmethyl)-L-fucopyranoside (1e)

In a clean round-bottom flask, **S11** (2.6 mmol, 1 equiv.) was dissolved with acetone/water mixture (9:1, 25 mL). After cooling down the mixture in an ice bath, NBS (5.2 mmol, 2 equiv.) was added. The reaction was stirred overnight while it was gradually warmed up to the room temperature. Water (20 mL) was added to quench the reaction followed by the extraction with EtOAc (3 x 100 mL). The combined organic layer was dried with Na<sub>2</sub>SO<sub>4</sub> and concentrated *in vacuo*. The concentrated crude mixture was subjected to FCC (SiO<sub>2</sub>, 30% EtOAc in hexane) to afford **1e** as white solid, which is confirmed by comparing with literature NMR spectra.<sup>2</sup>

<sup>2</sup>Nishi, Y.; Tanimoto, T. *Biosci. Biotechnol. Biochem.* **2009**, 73 (3), 562–569

## Preparation of 2,3,4-tri-*O*-(phenylmethyl)- $\alpha$ -L-rhamnopyranoside (**1f**)

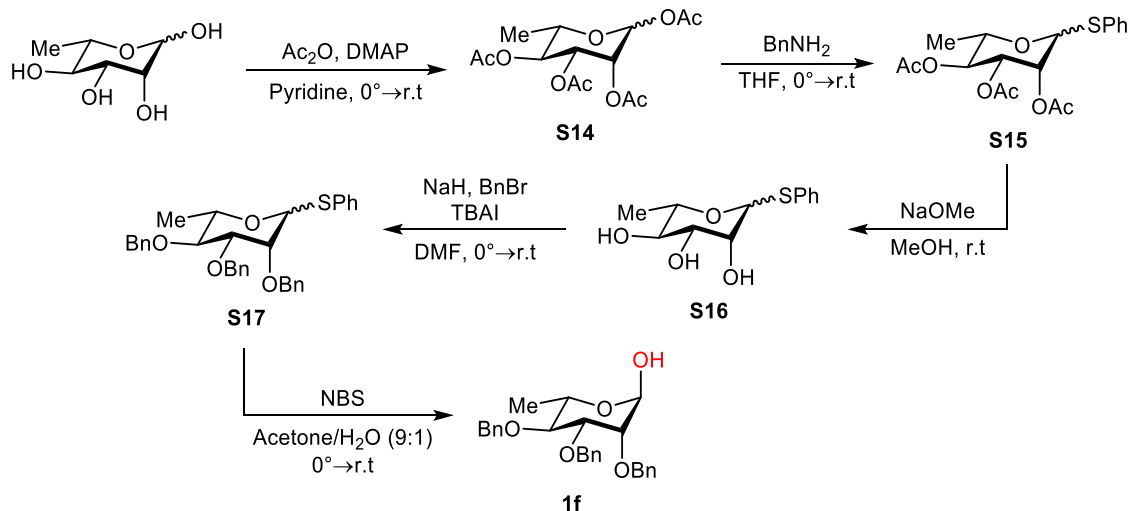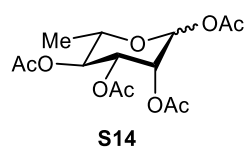

### 1,2,3,4-Tetra-*O*-acetyl-L-rhamnopyranoside (**S14**)

An oven dried round bottom flask was charged with L-rhamnose (3.0 mmol, 1.0 equiv.) and anhydrous pyridine (10 mL). After stirring the mixture until it became homogeneous, the round bottom flask was placed in an ice bath and was cooled down to 0°C. Into the cooled down mixture, acetic anhydride (18 mmol, 6.0 equiv.) and DMAP (0.15 mmol, 0.05 equiv.) were added in that order. The reaction was slowly warmed up to room temperature with stirring until all starting materials were gone. The mixture was then diluted with DCM (100 mL) and washed with 1N HCl solution (2 x 80 mL). The organic layer was washed with water (2 x 80 mL) and then saturated brine (2 x 80 mL). The extracted organic layer was dried with Na<sub>2</sub>SO<sub>4</sub> and concentrated *in vacuo* to afford 1,2,3,4-tetra-*O*-acetyl-L-rhamnopyranoside **S14** as yellowish syrup. The product was then subjected to the next synthesis without further purification.

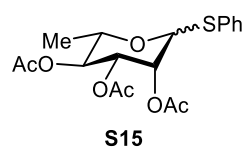

### Phenyl 2,3,4-tri-*O*-acetyl-1-thio-L-rhamnopyranoside (**S15**)

In an oven dried round bottom flask, **S14** (3.0 mmol, 1.0 equiv.) and anhydrous DCM (5 mL) were added. After stirring until the mixture became homogeneous, PhSH (4.5 mmol, 1.5 equiv.) and BF<sub>3</sub>·OEt<sub>2</sub> (9.0 mmol, 3.0 equiv.) were added. The reaction mixture was stirred overnight and quenched with saturated NaHCO<sub>3</sub> solution (20 mL). The aqueous layer was extracted with DCM (3 x 35 mL) and dried with Na<sub>2</sub>SO<sub>4</sub>. The extracted organic layer was concentrated *in vacuo* and subjected to FCC (SiO<sub>2</sub>, 30% EtOAc in hexane) to afford phenyl 2,3,4-tri-*O*-acetyl-1-thio-L-rhamnopyranoside **S15** as white solid.

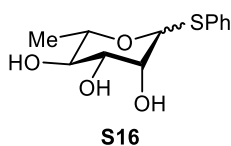

### Phenyl 1-thio-L-rhamnopyranoside (S16)

In an oven dried round bottom flask, **S15** (3.0 mmol, 1 equiv.) and MeOH (20 mL) were added. After stirring until the mixture became homogeneous, a chip of sodium metal (0.3 mmol, 0.1 equiv.) was added and stirred at room temperature until all starting materials were consumed. Once all starting materials are gone, the reaction was neutralized with acetic acid and was concentrated *in vacuo* to afford phenyl 1-thio-L-rhamnopyranoside **S16** as white syrup. The product was then subjected to next reaction without further purification.

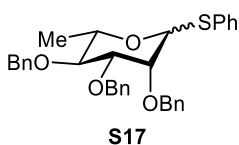

### Phenyl 2,3,4-tri-*O*-(phenylmethyl)-1-thio-L-rhamnopyranoside (S17)

An oven dried and nitrogen filled round-bottom flask was charged with **S16** (3.0 mmol, 1.0 equiv.) and DMF (20 mL). After cooling down the reaction in an ice bath, NaH (18 mmol, 6.0 equiv.) was added portion wise. Once H<sub>2</sub> gas stops generating, BnBr (18 mmol, 6.0 equiv.) was added followed by TBAI (0.15 mmol, 0.05 equiv.). The reaction mixture was stirred at room temperature overnight and quenched by adding water. The mixture was extracted with EtOAc (3 x 60 mL), and the organic layer was dried with Na<sub>2</sub>SO<sub>4</sub> and concentrated *in vacuo*. The concentrated crude mixture was subjected to FCC (SiO<sub>2</sub>, 5% EtOAc in hexane) to afford phenyl 2,3,4-tri-*O*-(phenylmethyl)-1-thio-L-rhamnopyranoside **S17** as yellowish oil.

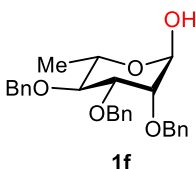

### 2,3,4-tri-*O*-(phenylmethyl)- $\alpha$ -L-rhamnopyranoside (1f)

In a clean round-bottom flask, **S7** (2.5 mmol, 1 equiv.) was dissolved with acetone/water mixture (9:1, 22.2 mL). After cooling down the mixture in an ice bath, NBS (5.0 mmol, 2.0 equiv.) was added. The reaction was stirred overnight while it was gradually warmed up to the room temperature. Water (20 mL) was added to quench the reaction followed by the extraction with EtOAc (3 x 70 mL). The combined organic layer was dried with Na<sub>2</sub>SO<sub>4</sub> and concentrated *in vacuo*. The concentrated crude mixture was subjected to FCC (SiO<sub>2</sub>, 30% EtOAc in hexane) to afford 2,3,4-tri-*O*-(phenylmethyl)- $\alpha$ -L-rhamnopyranoside **1f** as white solid, which is confirmed by comparing with literature NMR spectra.<sup>3</sup>

### Preparation of 2,3,5-Tris-*O*-(phenylmethyl)- $\beta$ -D-ribofuranose (1g)

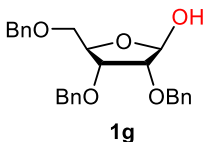

Purchased from Combi-Blocks. Batch#: A98634.

<sup>3</sup>Zhang, J.; Fu, J.; Si, W.; Wang, X.; Wang, Z.; Tang, J. *Carbohydrate Research*. **2011**, 346, 2290-2293

## Preparation of 2,3,4,6-tetrakis-*O*-[(4-methoxyphenyl)methyl]-*D*-galactopyranose (**1h**)

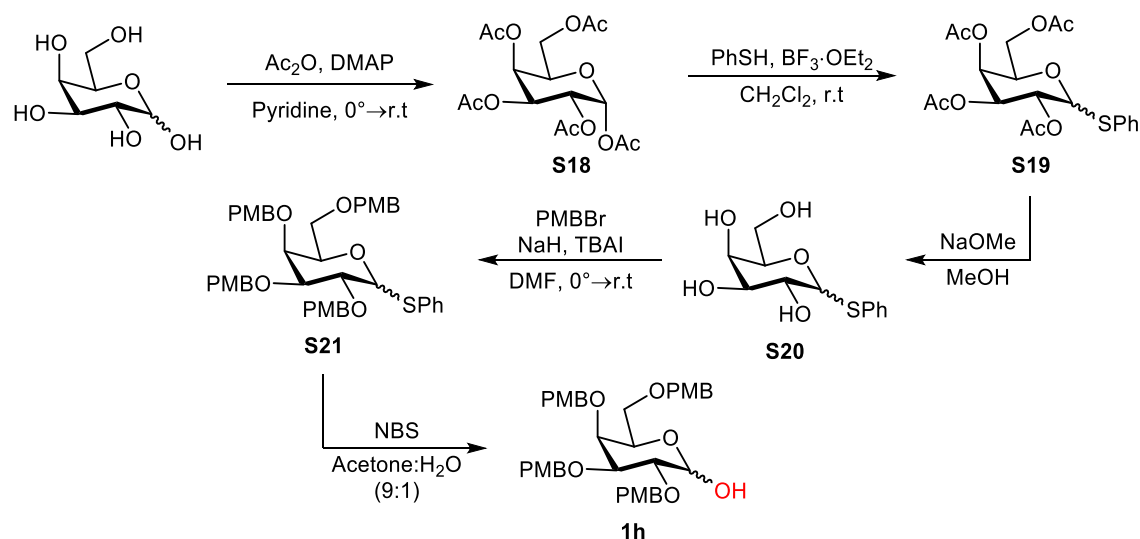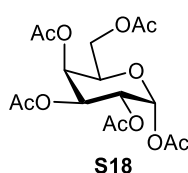

### 1,2,3,4,6-Penta-*O*-acetyl- $\alpha$ -*D*-galactopyranoside (**S18**)

In an oven dried round-bottom flask, *D*-galactose (5.55 mmol, 1.0 equiv.) and pyridine (20 mL) were added. The reaction mixture was stirred until the solution became homogeneous, and then the round-bottom flask was placed in an ice-bath. After the reaction was cooled down, acetic anhydride (33.3 mmol, 6.0 equiv.) and DMAP (0.278 mmol, 0.05 equiv.) were added in that order. The reaction was stirred overnight while it was gradually warmed up to the room temperature. The reaction was quenched by diluting with DCM (150 mL) followed by washing with 1N HCl (2 x 150 mL), water (2 x 150 mL), and then brine (150 mL). Extracted organic layer was dried with Na<sub>2</sub>SO<sub>4</sub> and was concentrated *in vacuo* to yield 1,2,3,4,6-penta-*O*-acetyl- $\alpha$ -*D*-galactopyranoside **S18** as yellowish syrup. The product was subjected to the next synthesis without further purification. <sup>1</sup>H NMR (500 MHz, Chloroform-*d*)  $\delta$  6.38 (d, *J* = 1.8 Hz, 1H), 5.50 (d, *J* = 1.5 Hz, 1H), 5.36 – 5.32 (m, 2H), 4.34 (td, *J* = 6.6, 1.4 Hz, 1H), 4.14 – 4.05 (m, 2H), 2.16 (s, 3H), 2.16 (s, 3H), 2.04 (s, 3H), 2.02 (s, 3H), 2.01 (s, 3H).

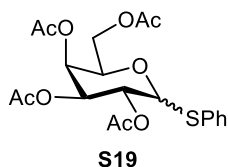

### Phenyl 2,3,4,6-tetra-*O*-acetyl-1-thio-*D*-galactopyranoside (**S19**)

In an oven dried round-bottom flask, **S18** (11 mmol, 1.0 equiv.) and DCM (15 mL) were added. After the addition of thiophenol (16.5 mmol, 1.5 equiv.), the round-bottom flask was sealed with a rubber-septum cap and purged with nitrogen gas. The reaction mixture was stirred until it became homogeneous, and then BF<sub>3</sub>·OEt<sub>2</sub> (33 mmol, 3.0 equiv.) was slowly injected into the flask. The reaction was stirred overnight at room temperature and quenched with saturated NaHCO<sub>3</sub> solution (50 mL). After extracting the mixture with DCM (3 x 70mL), the combined organic layer was dried with Na<sub>2</sub>SO<sub>4</sub> and concentrated *in vacuo*. The concentrated crude mixture was subjected to FCC (SiO<sub>2</sub>, 20% EtOAc in hexane → 40% EtOAc in hexane) to afford phenyl 2,3,4,6-tetra-*O*-acetyl-1-thio-*D*-galactopyranoside **S19** as product. <sup>1</sup>H NMR (500 MHz, Chloroform-*d*)  $\delta$  7.54 – 7.49 (m, 2H), 7.34 – 7.30 (m, 3H), 5.42 (dd, *J* = 3.4, 1.1 Hz, 1H), 5.24 (t, *J* = 10.0 Hz, 1H), 5.05 (dd, *J* = 9.9, 3.3 Hz, 1H), 4.72 (d, *J* = 10.0 Hz, 1H), 4.19 (dd, *J* = 11.3, 7.0 Hz, 1H), 4.12

(dd,  $J = 11.4, 6.3$  Hz, 2H), 3.96 – 3.92 (m, 1H), 2.12 (s, 3H), 2.10 (s, 3H), 2.04 (s, 3H), 1.98 (s, 3H).

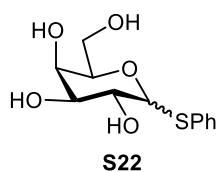

#### Phenyl 1-thio-D-galactopyranoside (S20)

A dry round-bottom flask was filled with **S19** (11 mmol, 1.0 equiv.) and dry methanol (45 mL). After the reaction mixture became homogeneous, a chip of sodium metal (1.1 mmol, 0.1 equiv.) was added. The reaction was stirred overnight at room temperature, and then quenched by adding acetic acid until the pH of the reaction became neutral. The crude mixture was concentrated *in vacuo* to afford phenyl 1-thio-D-galactopyranoside **S20** as yellowish white solid. The product was subjected to the subsequent reaction without further purification.

#### Phenyl 2,3,4,6-tetrakis-*O*-[(4-methoxyphenyl)methyl]-1-thio-D-galactopyranoside (S21)

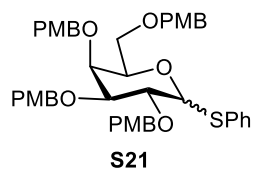

An oven dried and nitrogen filled round-bottom flask was charged with **S20** (11 mmol, 1.0 equiv.) and DMF (60 mL). After cooling down the reaction in an ice bath, NaH (88 mmol, 8.0 equiv.) was added portion wise. Once H<sub>2</sub> gas stops generating, PMBBr (88 mmol, 8.0 equiv.) was added followed by TBAI (1.1 mmol, 0.1 equiv.). The reaction mixture was stirred at room temperature overnight and quenched by adding water. The mixture was extracted with EtOAc (3 x 100 mL), and the organic layer was dried with Na<sub>2</sub>SO<sub>4</sub> and concentrated *in vacuo*. The concentrated crude mixture was subjected to FCC (SiO<sub>2</sub>, 20% EtOAc in hexane → 30% EtOAc in hexane) to afford phenyl 2,3,4,6-tetrakis-*O*-[(4-methoxyphenyl)methyl]-1-thio-D-galactopyranoside **S21** as yellowish syrup.

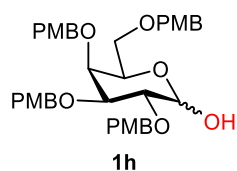

#### 2,3,4,6-tetrakis-*O*-[(4-methoxyphenyl)methyl]-D-galactopyranoside (1h)

In a clean round-bottom flask, **S21** (10 mmol, 1.0 equiv.) was dissolved with acetone/water mixture (9:1, 55.5 mL). After cooling down the mixture in an ice bath, NBS (21 mmol, 2.1 equiv.) was added. The reaction was stirred overnight while it was gradually warmed up to the room temperature. Water (50 mL) was added to quench the reaction followed by the extraction with EtOAc (3 x 120 mL). The combined organic layer was dried with Na<sub>2</sub>SO<sub>4</sub> and concentrated *in vacuo*. The concentrated crude mixture was subjected to FCC (SiO<sub>2</sub>, 30% EtOAc in hexane → 40% EtOAc in hexane) to afford 2,3,4,6-tetrakis-*O*-[(4-methoxyphenyl)methyl]-D-galactopyranoside **1h** as white solid product, which is confirmed by comparing with literature NMR spectra.<sup>4</sup>

<sup>4</sup>Whalen, L. J.; Halcomb, R. L. *Org. Lett.* **2004**, *6*, 19, 3221-3224

### Preparation of 2,3,4,6-tetrakis-*O*-[(4-methoxyphenyl)methyl]- $\alpha$ -D-glucopyranoside (**1i**)

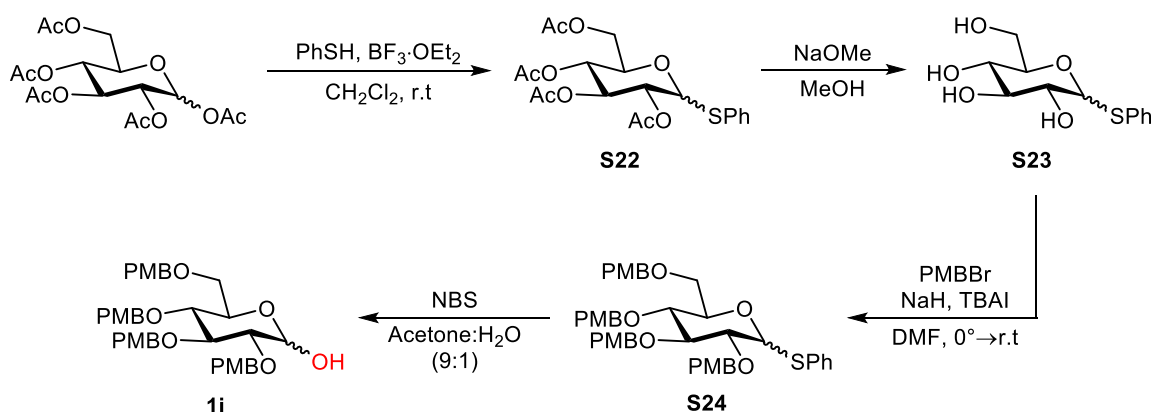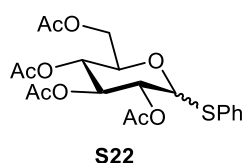

#### Phenyl 2,3,4,6-tetra-*O*-acetyl-1-thio-D-glucopyranoside (**S22**)

In an oven dried round-bottom flask, 1,2,3,4,6-penta-*O*-acetyl-D-glucopyranoside (5.0 mmol, 1.0 equiv.) and DCM (5 mL) were added. After the addition of thiophenol (7.5 mmol, 1.5 equiv.), the round-bottom flask was sealed with a rubber-septum cap and purged with nitrogen gas. The reaction mixture was stirred until it became homogeneous, and then  $\text{BF}_3 \cdot \text{OEt}_2$  (15 mmol, 3.0 equiv.) was slowly injected into the flask. The reaction was stirred overnight at room temperature and quenched with saturated  $\text{NaHCO}_3$  solution (10 mL). After extracting the mixture with DCM (3 x 50 mL), the combined organic layer was dried with  $\text{Na}_2\text{SO}_4$  and concentrated *in vacuo*. The concentrated crude mixture was subjected to FCC ( $\text{SiO}_2$ , pure hexane  $\rightarrow$  30% EtOAc in hexane) to afford phenyl 2,3,4,6-tetra-*O*-acetyl-1-thio-D-glucopyranoside **S22** as white solid.

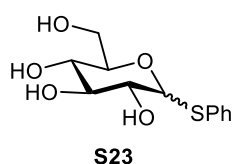

#### Phenyl 1-thio-D-glucopyranoside (**S23**)

A dry round-bottom flask was filled with **S22** (5.0 mmol, 1.0 equiv.) and dry methanol (30 mL). After the reaction mixture became homogeneous, a chip of sodium metal (0.5 mmol, 0.1 equiv.) was added. The reaction was stirred overnight at room temperature, and then quenched by adding acetic acid until the pH of the reaction became neutral. The crude mixture was concentrated *in vacuo* to yield **S23** as yellowish white solid. The product was subjected to the subsequent reaction without further purification.



### Phenyl 2,3,4,6-tetrakis-*O*-[(4-methoxyphenyl)methyl]-1-thio-*D*-glucopyranoside (**S24**)

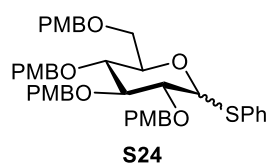

An oven dried and nitrogen filled round-bottom flask was charged with **S23** (5.0 mmol, 1.0 equiv.) and DMF (30 mL). After cooling down the reaction in an ice bath, NaH (25 mmol, 5.0 equiv.) was added portion wise. Once H<sub>2</sub> gas stops generating, PMBBBr (25 mmol, 5.0 equiv.) was added followed by TBAI (0.5 mmol, 0.1 equiv.). The reaction mixture was stirred at room temperature overnight and quenched by adding water. The mixture was extracted with EtOAc (3 x 100 mL), and the organic layer was dried with Na<sub>2</sub>SO<sub>4</sub> and concentrated *in vacuo*. The concentrated crude mixture was subjected to FCC (SiO<sub>2</sub>, 40% EtOAc in hexane) to afford phenyl 2,3,4,6-tetrakis-*O*-[(4-methoxyphenyl)methyl]-1-thio-*D*-glucopyranoside **S24** as yellowish white syrup.

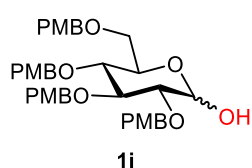

### 2,3,4,6-Tetrakis-*O*-[(4-methoxyphenyl)methyl]- $\alpha$ -*D*-glucopyranoside (**1i**)

In a clean round-bottom flask, **S24** (5.0 mmol, 1.0 equiv.) was dissolved with acetone/water mixture (9:1, 33.3 mL). After cooling down the mixture in an ice bath, NBS (10 mmol, 2.0 equiv.) was added. The reaction was stirred overnight while it was gradually warmed up to the room temperature. Water (35 mL) was added to quench the reaction followed by the extraction with EtOAc (3 x 100 mL). The combined organic layer was dried with Na<sub>2</sub>SO<sub>4</sub> and concentrated *in vacuo*. The concentrated crude mixture was subjected to FCC (SiO<sub>2</sub>, 40% EtOAc in hexane) to afford 2,3,4,6-tetrakis-*O*-[(4-methoxyphenyl)methyl]- $\alpha$ -*D*-glucopyranoside **1i** as white solid, which is confirmed by comparing with literature NMR spectra.<sup>5</sup>

<sup>5</sup>Lucchetti, N.; Gilmour, R. *Chem. Eur. J.* **2018**, *24*,16266–16270

### Preparation of 2,3,4,6-tetrakis-*O*-[(4-methoxyphenyl)methyl]- $\alpha$ -D-mannopyranoside (**1j**)

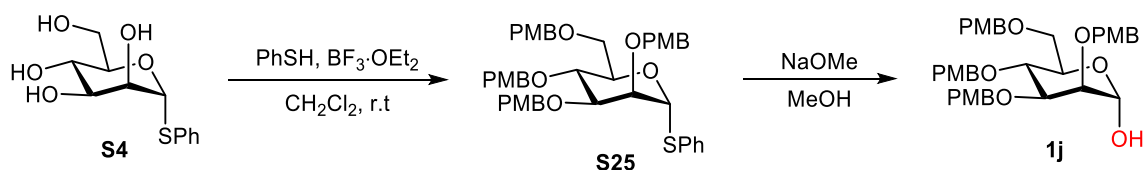

### Phenyl 2,3,4,6-tetrakis-*O*-[(4-methoxyphenyl)methyl]-1-thio- $\alpha$ -D-mannopyranoside (**S25**)

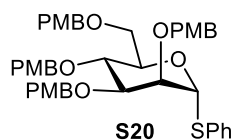

An oven dried and nitrogen filled round-bottom flask was charged with **S4** (9.5 mmol, 1.0 equiv.) and DMF (50 mL). After cooling down the reaction in an ice bath, NaH (52 mmol, 5.5 equiv.) was added portion wise. Once H<sub>2</sub> gas stops generating, PMBBR (47.5 mmol, 5.0 equiv.) was added followed by TBAI (0.95 mmol, 0.1 equiv.). The reaction

mixture was stirred at room temperature overnight and quenched by adding water. The mixture was extracted with EtOAc (3 x 100 mL), and the organic layer was dried with Na<sub>2</sub>SO<sub>4</sub> and concentrated *in vacuo*. The concentrated crude mixture was subjected to FCC (SiO<sub>2</sub>, pure hexane → 40% EtOAc in hexane) to afford phenyl 2,3,4,6-tetrakis-*O*-[(4-methoxyphenyl)methyl]-1-thio- $\alpha$ -D-mannopyranoside **S25**.

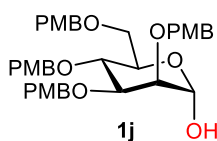

### 2,3,4,6-Tetrakis-*O*-[(4-methoxyphenyl)methyl]- $\alpha$ -D-mannopyranoside (**1j**)

In a clean round-bottom flask, **S25** (9.5 mmol, 1.0 equiv.) was dissolved with acetone/water mixture (9:1, 55.5 mL). After cooling down the mixture in an ice bath, NBS (20 mmol, 2.1 equiv.) was added. The reaction was stirred overnight while it was gradually warmed up to the room temperature. Water (50 mL) was added to quench the reaction followed by the extraction with EtOAc (3 x 120 mL). The combined organic layer was dried with Na<sub>2</sub>SO<sub>4</sub> and concentrated *in vacuo*. The concentrated crude mixture was subjected to FCC (SiO<sub>2</sub>, 50% EtOAc in hexane → 70% EtOAc in hexane) to afford 2,3,4,6-Tetrakis-*O*-[(4-methoxyphenyl)methyl]- $\alpha$ -D-mannopyranoside **1j** as white solid. <sup>1</sup>H NMR (700 MHz, CDCl<sub>3</sub>)  $\delta$  7.27 (d, *J* = 10.2 Hz, 6H), 7.06 (dd, *J* = 8.7, 2.6 Hz, 2H), 6.90 – 6.78 (m, 8H), 5.21 (d, *J* = 1.9 Hz, 1H), 4.77 (d, *J* = 10.4 Hz, 1H), 4.66 (d, *J* = 20.2 Hz, 2H), 4.55 (d, *J* = 3.8 Hz, 2H), 4.52 (d, *J* = 11.9 Hz, 1H), 4.48 (d, *J* = 11.9 Hz, 1H), 4.39 (d, *J* = 10.5 Hz, 1H), 3.96 (ddd, *J* = 8.9, 6.3, 2.0 Hz, 1H), 3.90 (dd, *J* = 9.5, 3.0 Hz, 1H), 3.81 (s, 3H), 3.80 (s, 3H), 3.79 (s, 3H), 3.79 (s, 3H), 3.76 (t, *J* = 2.5 Hz, 1H), 3.68 – 3.66 (m, 1H), 3.65 (d, *J* = 1.9 Hz, 1H), 3.62 (dd, *J* = 10.5, 6.4 Hz, 1H); <sup>13</sup>C NMR (176 MHz, CDCl<sub>3</sub>)  $\delta$  159.1, 159.1, 159.1, 159.1, 130.7, 130.6, 130.4, 130.1, 129.8, 129.7, 129.6, 129.6, 129.6, 129.5, 129.2, 129.2, 113.7, 113.7, 113.7, 113.6, 92.7, 79.4, 74.9, 74.6, 74.3, 72.8, 72.2, 71.8, 71.4, 69.1, 55.2, 55.2.

### Preparation of 2,3,4,6-tetra-*O*-acetyl- $\alpha$ -D-galactopyranose (**1k**)

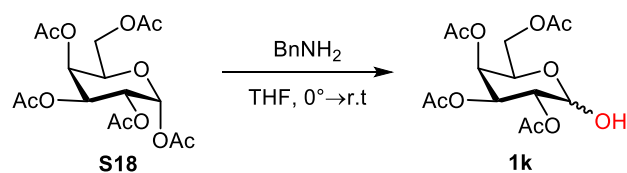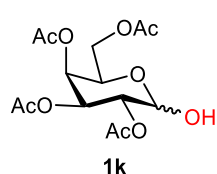

### 2,3,4,6-tetra-*O*-acetyl-D-galactopyranoside (**1k**)

In an oven dried round-bottom flask, **S18** (5.55 mmol, 1.0 equiv.) and THF (20 mL) were added. The mixture was stirred until the solution became homogeneous, and then benzylamine (8.33 mmol, 1.5 equiv.) was added. The reaction was stirred at room temperature for 20 hours and quenched by evaporating the solvent under reduced pressure. The crude mixture was diluted with DCM (150 mL) and washed with 1N HCl (100 mL x 2), saturated  $\text{NaHCO}_3$  solution (100 mL), and then water (100 mL). The organic layer was dried with  $\text{Na}_2\text{SO}_4$  and was concentrated *in vacuo* to give amber-colored oil. This oil was subjected to FCC ( $\text{SiO}_2$ , 20% EtOAc in hexane  $\rightarrow$  60% EtOAc in hexane) to afford 2,3,4,6-tetra-*O*-acetyl-D-galactopyranoside **1k** as yellowish solid, which was confirmed by comparing with reported NMR spectra.<sup>6</sup>

<sup>6</sup>Cai, T. B.; Lu, D.; Tang, X.; Zhang, Y.; Landerholm, M.; Wang, P. G. *J. Org. Chem.* **2005**, 70, 9, 3518-3524

### Preparation of 2,3,4,6-tetra-*O*-acetyl-D-glucopyranoside (**11**)

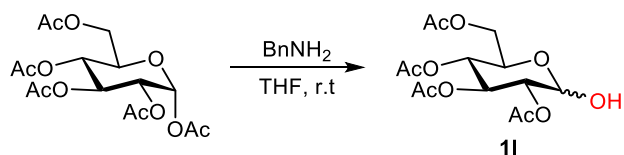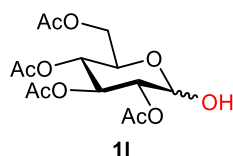

### 2,3,4,6-Tetra-*O*-acetyl-D-glucopyranoside (**11**)

In an oven dried round-bottom flask, 1,2,3,4,6-penta-*O*-acetyl- $\alpha$ -D-glucopyranoside (5.12 mmol, 1.0 equiv.) and THF (20 mL) were added. The mixture was stirred until the solution became homogeneous, and then benzylamine (7.69 mmol, 1.5 equiv.) was added. The reaction was stirred at room temperature for 24 hours and quenched by evaporating the solvent under reduced pressure. The crude mixture was diluted with DCM (150 mL) and washed with 1N HCl (2 x 100 mL), saturated  $\text{NaHCO}_3$  solution (100 mL), and then water (100 mL). The organic layer was dried with  $\text{Na}_2\text{SO}_4$  and was concentrated *in vacuo* to give amber-colored oil. This oil was subjected to FCC ( $\text{SiO}_2$ , 60% EtOAc in hexane) to afford 2,3,4,6-tetra-*O*-acetyl-D-glucopyranoside **11** as yellowish solid, which is confirmed by comparing with literature NMR spectra.<sup>7</sup>

<sup>7</sup>Ikeda, K.; Morimoto, T.; Kakiuchi, K. *J. Org. Chem.* **2010**, 75, 18, 6279–6282

### Preparation of 2,3,4,6-tetra-*O*-acetyl-D-mannopyranose (**1m**)

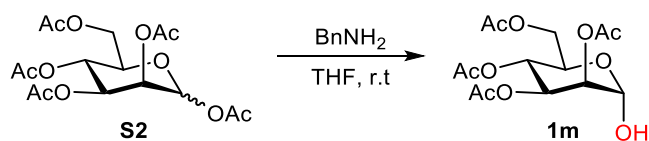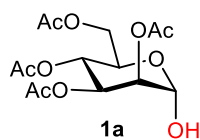

#### 2,3,4,6-Tetra-*O*-acetyl- $\alpha$ -D-mannopyranoside (**1m**)

In an oven dried round-bottom flask, **S2** (2.17 g, 5.55 mmol) and THF (20 mL) were added. The mixture was stirred until the solution became homogeneous, and then benzylamine (0.91 mL, 8.33 mmol) was added. The reaction was stirred at room temperature for 20 hours and quenched by evaporating the solvent under reduced pressure. The crude mixture was diluted with DCM (150 mL) and washed with HCl (1.0 M, 100 mL x 2),  $\text{NaHCO}_3$  (saturated, 100 mL), and then water (100 mL). The organic layer was dried with  $\text{Na}_2\text{SO}_4$  and was concentrated *in vacuo* to give amber-colored oil. This oil was subjected to FCC ( $\text{SiO}_2$ , 20% EtOAc in hexane  $\rightarrow$  60% EtOAc in hexane) to afford 2,3,4,6-tetra-*O*-acetyl-D-mannopyranoside **1m** as yellowish solid, which was confirmed by comparing with reported NMR spectra.<sup>8</sup> **<sup>1</sup>H NMR** (700 MHz, Chloroform-*d*)  $\delta$  5.42 (dd,  $J = 10.1, 3.4$  Hz, 1H), 5.30 (t,  $J = 9.8$  Hz, 1H), 5.28 – 5.24 (m, 2H), 4.27 – 4.22 (m, 2H), 4.12 (q,  $J = 7.4$  Hz, 2H), 3.19 (br, 1H), 2.16 (s, 3H), 2.11 (s, 3H), 2.04 (s, 3H), 2.00 (s, 3H).

<sup>8</sup>Carcabal, P.; Hunig, I.; Gamblin, D. P.; Liu, B.; Jockusch, R. A.; Kroemer, R. T.; Snoek, L. C.; Fairbanks, A. J.; Davis, B. G.; Simons, J. P. *J. Am. Chem. Soc.* **2006**, 128, 6, 1976-1981

### Preparation of 2,3,4-tri-*O*-acetyl- $\alpha$ -L-rhamnopyranoside (**1n**)

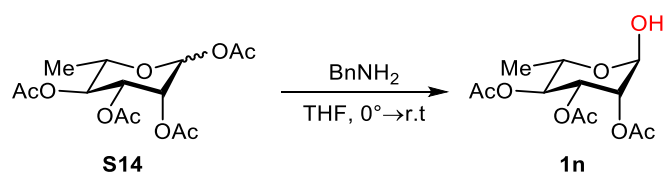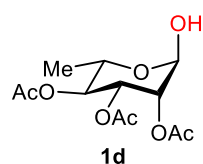

#### 2,3,4-Tri-*O*-acetyl- $\alpha$ -L-rhamnopyranoside (**1n**)

In an oven dried round-bottom flask, **S14** (3.0 mmol, 1.0 equiv.) and THF (15 mL) were added. The mixture was stirred until the solution became homogeneous, and then benzylamine (4.5 mmol, 1.5 equiv.) was added. The reaction was stirred at room temperature for 20 hours and quenched by evaporating the solvent under reduced pressure. The crude mixture was diluted with DCM (70 mL) and washed with 1N HCl (2 x 50 mL), saturated NaHCO<sub>3</sub> solution (50 mL), and then water (50 mL). The organic layer was dried with Na<sub>2</sub>SO<sub>4</sub> and was concentrated *in vacuo* to give amber-colored oil. This oil was subjected to FCC (SiO<sub>2</sub>, 20% EtOAc in hexane  $\rightarrow$  50% EtOAc in hexane) to afford 2,3,4-tri-*O*-acetyl- $\alpha$ -L-rhamnopyranoside **1n** as yellowish solid, which is confirmed by comparing with literature NMR spectra.<sup>9</sup>

<sup>9</sup>Donahue, M. G.; Johnston, J. N. *Bioorg. Med. Chem. Lett.* **2006**, 16, 5602–5604

### Preparation of 2,3,4-tri-*O*-benzoyl-L-rhamnopyranoside (**1o**)

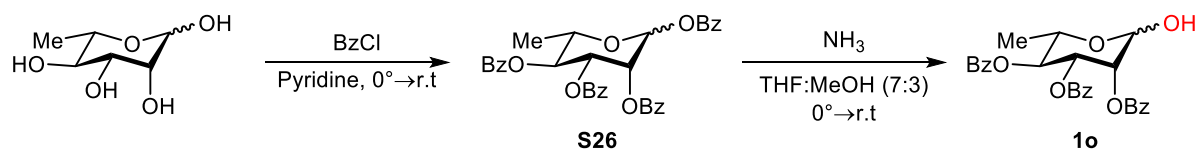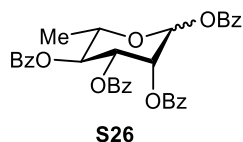

#### 1,2,3,4-Tetra-*O*-benzoyl-L-rhamnopyranoside (**S26**)

An oven dried round bottom flask was charged with L-rhamnose (5.5 mmol, 1.0 equiv.) and anhydrous pyridine (12 mL). After stirring the mixture until it became homogeneous, the round bottom flask was placed in an ice bath and was cooled down to 0°C. Into the cooled down mixture, benzoyl chloride (33 mmol, 6.0 equiv.) was added, and then the reaction was slowly warmed up to room temperature with stirring until all starting materials were gone. The mixture was then diluted with DCM (100 mL) and washed with 1N HCl solution (2 x 80 mL). The organic layer was washed with water (2 x 80 mL) and then saturated brine (2 x 80 mL). The extracted organic layer was dried with Na<sub>2</sub>SO<sub>4</sub> and concentrated *in vacuo*. The worked-up mixture was then subjected to FCC (SiO<sub>2</sub>, 20% EtOAc in hexane) to afford 1,2,3,4-tetra-*O*-benzoyl-L-rhamnopyranoside **S26** as white solid.

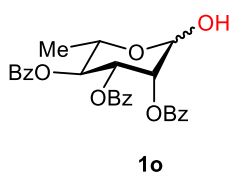

#### 2,3,4-tri-*O*-benzoyl-L-rhamnopyranoside (**1o**)

An oven dried round bottom flask was charged with 1,2,3,4-tetra-*O*-benzoyl-L-rhamnopyranoside **S26** (3.7 mmol, 1.0 equiv.) and THF:MeOH solution (7:3). After stirring the mixture until it became homogeneous, the round bottom flask was placed in an ice bath and was cooled down to 0°C. Into the cooled down mixture, ammonia gas was bubbled for 1 minute, and then the reaction was stirred for 10 hours while slowly warmed up to room temperature. The mixture was then concentrated *in vacuo*, and then was subjected to FCC (SiO<sub>2</sub>, 30% EtOAc in hexane) to afford 2,3,4-tri-*O*-benzoyl-L-rhamnopyranoside **1o** as white solid.

### Preparation of 2,3-bis-*O*-(phenylmethyl)-4,6-*O*-[(*R*)-phenylmethylene]- $\alpha$ -D-mannopyranoside (**1p**)

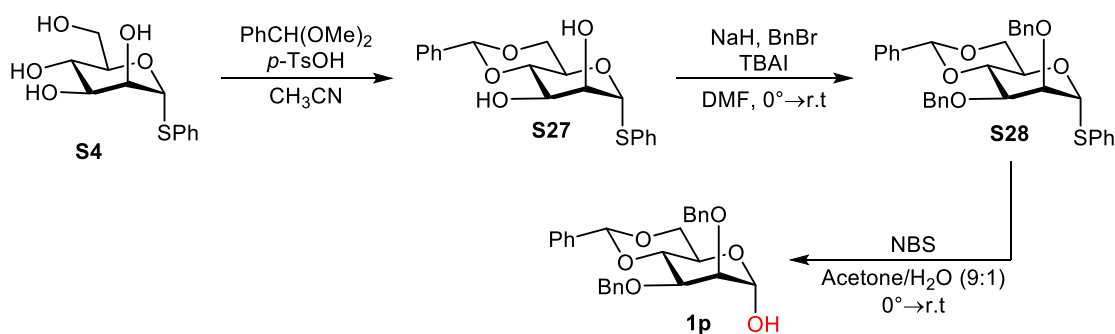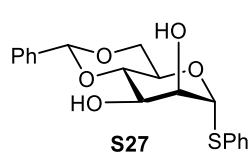

#### Phenyl 4,6-*O*-[(*R*)-phenylmethylene]-1-thio- $\alpha$ -D-mannopyranoside (**S27**)

An oven dried and nitrogen filled round-bottom flask was charged with **S4** (4.5 mmol, 1.0 equiv.) and anhydrous acetonitrile (26 mL).  $\text{PhCH(OMe)}_2$  (6.75 mmol, 1.5 equiv.) and  $p\text{-TsOH}$  (0.27 mmol, 0.06 equiv.) were added and the mixture was refluxed for 3 hours. Once all starting materials are consumed, the reaction was quenched with  $\text{Et}_3\text{N}$  (3 mL), diluted with  $\text{EtOAc}$  (50 mL), and then washed with brine. Collected organic layer was dried with  $\text{NaSO}_4$  and concentrated *in vacuo*. The concentrated crude mixture was subjected to FCC ( $\text{SiO}_2$ , 5%  $\text{EtOAc}$  in hexane) to afford phenyl 4,6-*O*-[(*R*)-phenylmethylene]-1-thio- $\alpha$ -D-mannopyranoside **S18** as white solid.

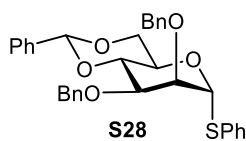

#### Phenyl 2,3-bis-*O*-(phenylmethyl)-4,6-*O*-[(*R*)-phenylmethylene]-1-thio- $\alpha$ -D-mannopyranoside (**S28**)

An oven dried and nitrogen filled round-bottom flask was charged with **S27** (3.0 mmol, 1.0 equiv.) and  $\text{DMF}$  (20 mL). After cooling down the reaction in an ice bath,  $\text{NaH}$  (18 mmol, 6.0 equiv.) was added portion wise. Once  $\text{H}_2$  gas stops generating,  $\text{BnBr}$  (12 mmol, 4 equiv.) was added followed by  $\text{TBAI}$  (0.15 mmol, 0.05 equiv.). The reaction mixture was stirred at room temperature overnight and quenched by adding water. The mixture was extracted with  $\text{EtOAc}$  (3 x 60 mL), and the organic layer was dried with  $\text{Na}_2\text{SO}_4$  and concentrated *in vacuo*.

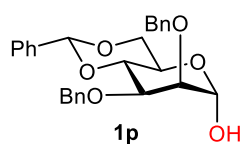

#### 2,3-Bis-*O*-(phenylmethyl)-4,6-*O*-[(*R*)-phenylmethylene]- $\alpha$ -D-mannopyranoside (**1p**)

In a clean round-bottom flask, **S19** (3.0 mmol, 1.0 equiv.) was dissolved with acetone/water mixture (9:1, 22.2 mL). After cooling down the mixture in an ice bath,  $\text{NBS}$  (6.3 mmol, 2.1 equiv.) was added. The reaction was stirred overnight while it was gradually warmed up to the room temperature. Water (20 mL) was added to quench the reaction followed by the extraction with  $\text{EtOAc}$  (3 x 60 mL). The combined organic layer was dried with  $\text{Na}_2\text{SO}_4$  and concentrated *in vacuo*. The concentrated crude mixture was subjected to FCC ( $\text{SiO}_2$ , 40%  $\text{EtOAc}$  in hexane) to afford 2,3-bis-*O*-(phenylmethyl)-4,6-*O*-[(*R*)-phenylmethylene]- $\alpha$ -D-mannopyranoside **1p** as white solid, which is confirmed by comparing with literature NMR spectra.<sup>10</sup>

<sup>10</sup>Codée, J. D. C.; Hossain, L. H.; Seeberger, P. H. *Org. Lett.* **2005**, 7, 15, 3251–3254



**Preparation of 2,3,6-tris-*O*-(phenylmethyl)-4-*O*-[2,3,4,6-tetrakis-*O*-(phenylmethyl)- $\beta$ -D-glucopyranosyl]-D-glucopyranoside (1q)**

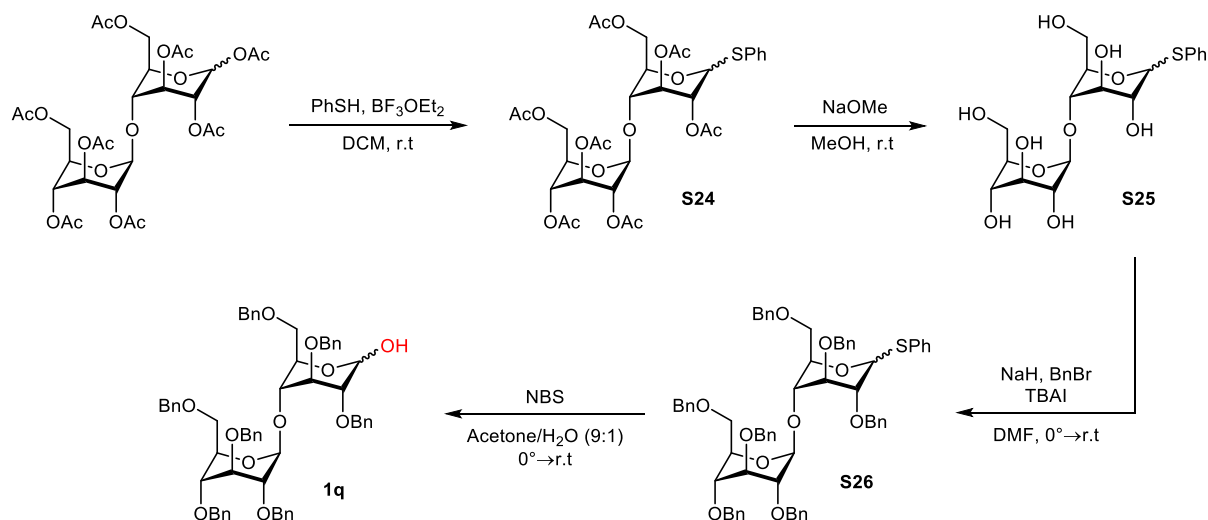

**Phenyl 4-*O*-(2,3,4,6-tetra-*O*-acetyl- $\beta$ -D-glucopyranosyl)-1-thio-D-glucopyranoside 2,3,6-triacetate (S29)**

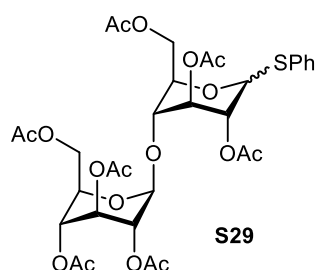

In an oven dried round-bottom flask,  $\alpha$ -D-cellobiose octaacetate (3.0 mmol, 1.0 equiv.) and DCM (10 mL) were added. After the addition of thiophenol (4.5 mmol, 1.5 equiv.), the round-bottom flask was sealed with a rubber-septum cap and purged with nitrogen gas. The reaction mixture was stirred until it became homogeneous, and then  $\text{BF}_3 \cdot \text{OEt}_2$  (9.0 mmol, 3.0 equiv.) was slowly injected into the flask. The reaction was stirred overnight at room temperature and quenched with saturated  $\text{NaHCO}_3$  solution (10 mL). After extracting the mixture with DCM (3 x 70 mL), the combined organic layer was dried with  $\text{Na}_2\text{SO}_4$  and concentrated *in vacuo*. The concentrated crude mixture was subjected to FCC ( $\text{SiO}_2$ , 50% EtOAc in hexane) to afford phenyl 4-*O*-(2,3,4,6-tetra-*O*-acetyl- $\beta$ -D-glucopyranosyl)-1-thio-D-glucopyranoside 2,3,6-triacetate **S29** as fluffy white solid.

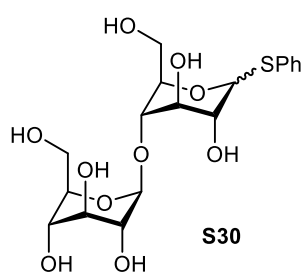

**Phenyl 4-*O*- $\beta$ -D-glucopyranosyl-1-thio-D-glucopyranoside (S30)**

A dry round-bottom flask was filled with **S29** (3.0 mmol, 1.0 equiv.) and dry methanol (20 mL). After the reaction mixture became homogeneous, a chip of sodium metal (0.3 mmol, 0.1 equiv.) was added. The reaction was stirred overnight at room temperature, and then quenched by adding acetic acid until the pH of the reaction became neutral. The crude mixture was concentrated *in vacuo* to yield **S30** as yellowish white solid. The product was subjected to the subsequent reaction without further purification.

**Phenyl 2,3,6-tris-*O*-(phenylmethyl)-4-*O*-[2,3,4,6-tetrakis-*O*-(phenylmethyl)- $\beta$ -D-glucopyranosyl]-1-thio-D-glucopyranoside (S31)**

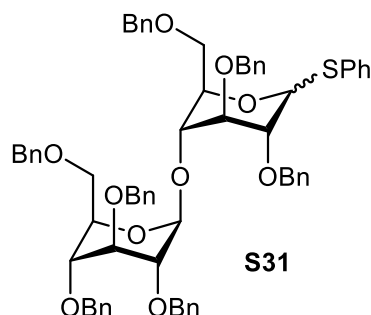

An oven dried and nitrogen filled round-bottom flask was charged with **S30** (3.0 mmol, 1.0 equiv.) and DMF (30 mL). After cooling down the reaction in an ice bath, NaH (48 mmol, 16 equiv.) was added portion wise. Once H<sub>2</sub> gas stops generating, BnBr (42 mmol, 14 equiv.) was added followed by TBAI (0.15 mmol, 0.05 equiv.). The reaction mixture was stirred at room temperature overnight and quenched by adding water. The mixture was extracted with EtOAc (3 x 80 mL), and the organic layer was dried with Na<sub>2</sub>SO<sub>4</sub> and concentrated *in vacuo*. The concentrated crude mixture was subjected to FCC (SiO<sub>2</sub>, hexane → 20% EtOAc in hexane) to afford phenyl 2,3,6-tris-*O*-(phenylmethyl)-4-*O*-[2,3,4,6-tetrakis-*O*-(phenylmethyl)- $\beta$ -D-glucopyranosyl]-1-thio-D-glucopyranoside **S31** as yellowish white solid.

**2,3,6-Tris-*O*-(phenylmethyl)-4-*O*-[2,3,4,6-tetrakis-*O*-(phenylmethyl)- $\beta$ -D-glucopyranosyl]-D-glucopyranoside (1q)**

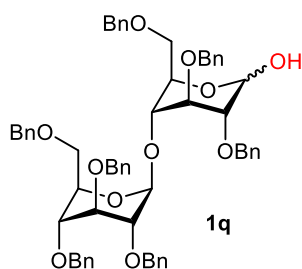

In a clean round-bottom flask, **S31** (2.0 mmol, 1.0 equiv.) was dissolved with acetone/water mixture (9:1, 22 mL). After cooling down the mixture in an ice bath, NBS (4.2 mmol, 2.1 equiv.) was added. The reaction was stirred overnight while it was gradually warmed up to the room temperature. Water (20 mL) was added to quench the reaction followed by the extraction with EtOAc (3 x 70 mL). The combined organic layer was dried with Na<sub>2</sub>SO<sub>4</sub> and concentrated *in vacuo*. The concentrated crude mixture was subjected to FCC (SiO<sub>2</sub>, 30% EtOAc in hexane) to afford 2,3,6-tris-*O*-(phenylmethyl)-4-*O*-[2,3,4,6-tetrakis-*O*-(phenylmethyl)- $\beta$ -D-glucopyranosyl]-D-glucopyranoside **1q** as white solid, which is confirmed by comparing with literature NMR spectra.<sup>11</sup>

<sup>11</sup>Liu, B.; Mechelen, J.; Berg, R.; Nieuwendijk, A.; Aerts, J.; Marel, G.; Codée, J. Overkleeft, H. S. *Eur. J. Org. Chem.* **2019**, 118–129

**b. List of components for the experimental setup**

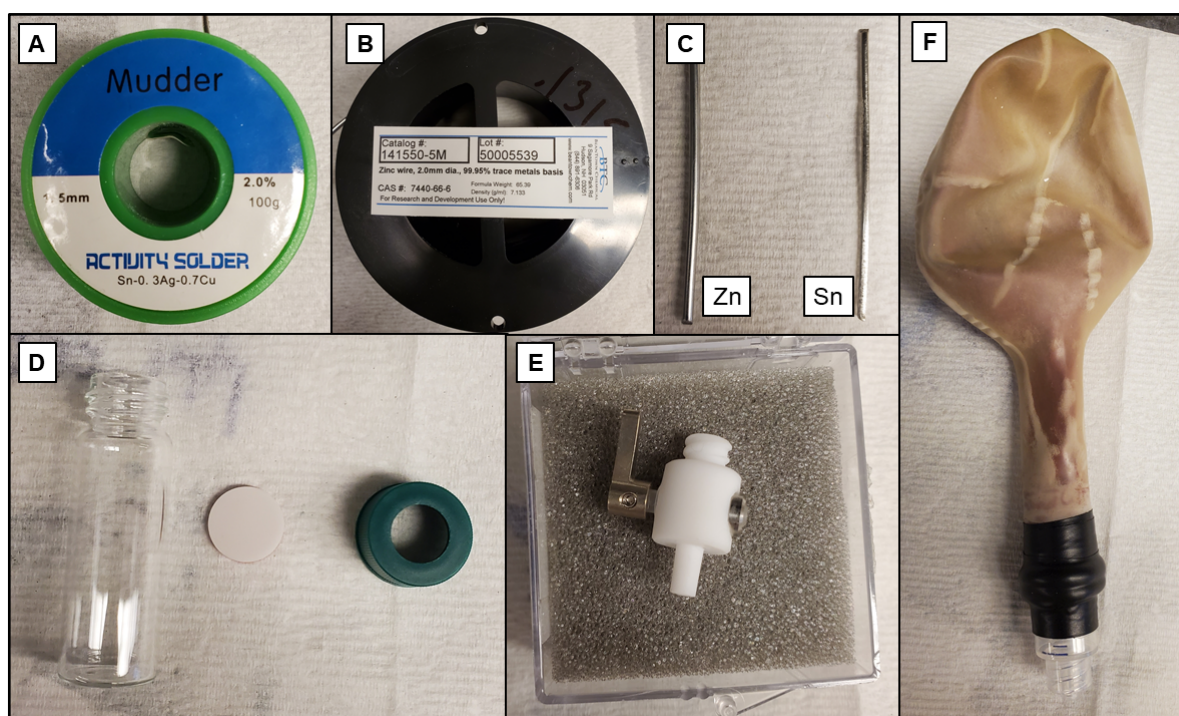

**Figure S2.** Components of experimental setup.

- A) Mudder soldering tin wire (1.5 mm diameter) – Amazon  
Content parameter: Lead-free, Sn 99% / Ag 0.3% / Cu 0.7%  
Flux 2% (washed away by sonicating in acetone)
- B) Zinc wire (2.0 mm diameter) – Beantown Chemical
- C) 5 cm zinc and tin wire
- D) 1 dram vial – Sigma and PTFE/Silicon seal with a cap – Fisher Scientific
- E) Hamilton MTB valve – Thomas Scientific
- F) Balloon for SF<sub>6</sub>

### c. Synthesis of glycosyl fluorides

#### General Procedure

An oven-dried 1 dram vial was charged with a glycosyl substrate (0.1 mmol, 1 equiv.) and tetrabutylammonium perchlorate (0.45 mmol, 0.15 M). The vial containing the mixture was sealed with PTFE/Silicone septum cap and was further dried under high vacuum for 5 minutes. Into the sealed vial, THF (3 mL) and triethylamine (0.3 mmol, 3 equiv.) were added, and the vial was stirred until the mixture became homogeneous. After plugging in the electrodes (2.3 cm submerged in the solution), the mixture was sparged with a balloon containing SF<sub>6</sub> gas for 30 seconds. Once the sparging was done, the valve of the balloon was adjusted to sparge small bubbles and left open until the reaction was stopped.

The reaction was stirred at high rpm while the electric current was applied to cathode and anode for 1 hour. The reaction mixture was then diluted with 30 mL of ethyl acetate, and then washed with 1N HCl (25 mL x 3), saturated NaHCO<sub>3</sub> (25 mL), water (25 mL), and brine (25 mL). The extracted organic layer was dried with Na<sub>2</sub>SO<sub>4</sub> and concentrated *in vacuo*. The worked-up reaction mixture was then subjected to FCC (SiO<sub>2</sub>) for purification.

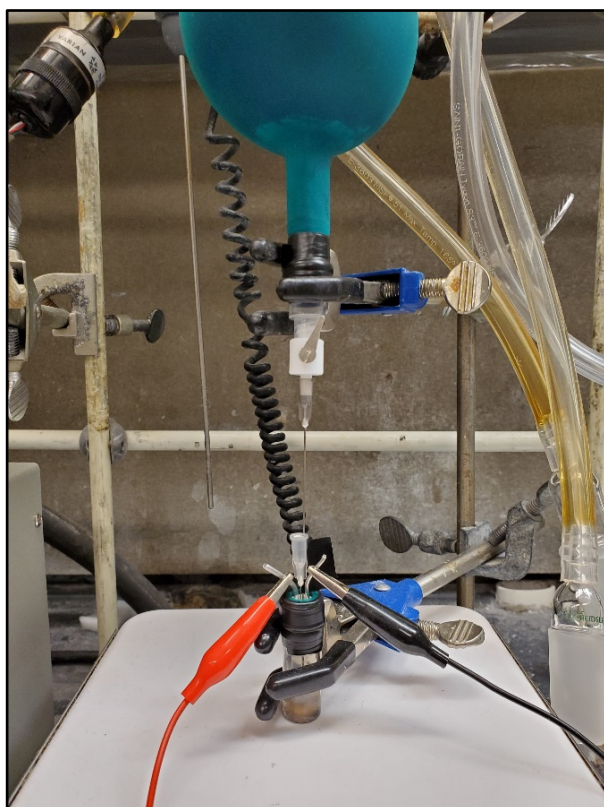

Figure S3. Experimental setup for substrate screening

**Cleaning Procedure for the Electrodes**

Before each use, the surface of electrodes is polished with 1000 grit sandpaper and sonicated in acetone. After wiping the surface with a paper towel, the electrodes are dried and kept under high vacuum.

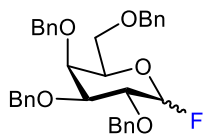

**2a**

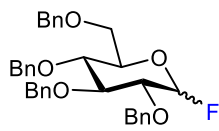

**2b**

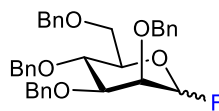

**2c**

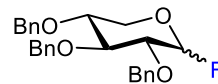

**2d**

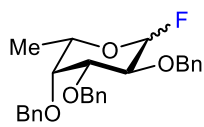

**2e**

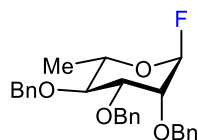

**2f**

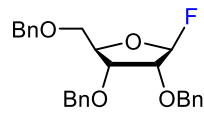

**2g**

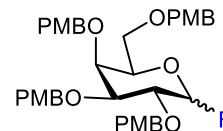

**2h**

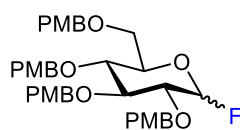

**2i**

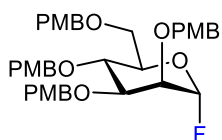

**2j**

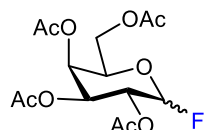

**2k**

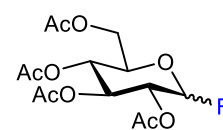

**2l**

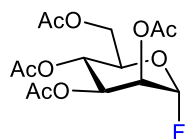

**2m**

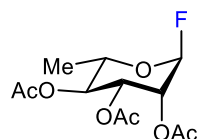

**2n**

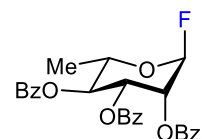

**2o**

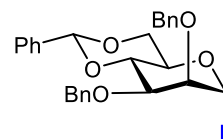

**2p**

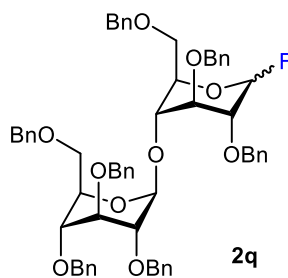

**2q**

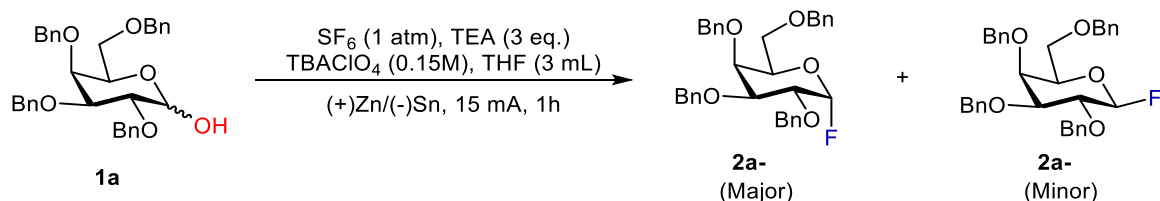

### Synthesis of 2,3,4,6-tetrakis-*O*-(phenylmethyl)-*D*-galactopyranosyl fluoride (**2a**)

The product was synthesized employing the general procedure. After a work-up, the reaction mixture was subjected to FCC ( $\text{SiO}_2$ , pure hexane  $\rightarrow$  20% EtOAc in hexane) to afford **2a** in average of 94% yield as yellowish cloudy syrup ( $R_{f-\alpha} = 0.36$  (20% EtOAc/Hex),  $R_{f-\beta} = 0.30$  (20% EtOAc/Hex)).

|                | 1 <sup>st</sup> Run                         | 2 <sup>nd</sup> Run                         |
|----------------|---------------------------------------------|---------------------------------------------|
| Isolated Yield | 93% (50.5 mg)<br>$\alpha : \beta = 1 : 1.6$ | 94% (51.3 mg)<br>$\alpha : \beta = 1 : 1.6$ |

**2,3,4,6-Tetrakis-*O*-(phenylmethyl)- $\alpha$ -*D*-galactopyranosyl fluoride** (minor product).  
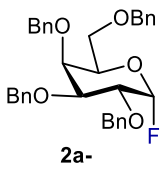
<sup>1</sup>H NMR (700 MHz,  $\text{CDCl}_3$ )  $\delta$  7.39 – 7.26 (m, 20H), 5.59 (dd,  $J = 53.7, 2.7$  Hz, 1H), 4.94 (d,  $J = 11.3$  Hz, 1H), 4.83 (dd,  $J = 23.1, 11.7$  Hz, 2H), 4.74 (dd,  $J = 20.8, 11.8$  Hz, 2H), 4.57 (d,  $J = 11.3$  Hz, 1H), 4.48 (d,  $J = 11.8$  Hz, 1H), 4.42 (d,  $J = 11.8$  Hz, 1H), 4.13 – 4.09 (m, 1H), 4.08 – 4.01 (m, 2H), 3.95 (dd,  $J = 10.1, 2.7$  Hz, 1H), 3.55 (d,  $J = 5.9$  Hz, 2H); <sup>13</sup>C NMR (176 MHz,  $\text{CDCl}_3$ )  $\delta$  138.4, 138.3, 138.0, 137.7, 128.4, 128.4, 128.3, 128.1, 128.0, 127.9, 127.8, 127.8, 127.7, 127.6, 127.5, 106.2 (d,  $J = 226.1$  Hz,  $\alpha$ -C<sub>1</sub>), 78.4, 75.7 (d,  $J = 23.8$  Hz), 74.8, 74.3, 73.7, 73.5, 73.1, 71.7 (d,  $J = 2.8$  Hz), 68.2; <sup>19</sup>F NMR (564 MHz,  $\text{CDCl}_3$ )  $\delta$  -150.13 (dd,  $J = 53.7, 25.3$  Hz); IR (thin film,  $\text{cm}^{-1}$ ): 3030, 2870, 1496, 1453, 1363, 1302, 1208, 1099, 1053, 1027, 910, 820, 732, 695; HRMS (ESI<sup>+</sup>) ( $m/z$ ):  $[\text{M}+\text{Na}]^+$  calcd for  $\text{C}_{34}\text{H}_{35}\text{FNaO}_5$  565.2392, found 565.2353;  $[\alpha]_{\text{D}}^{23} = +26.2$  ( $c = 0.4$ ,  $\text{CH}_2\text{Cl}_2$ )

**2,3,4,6-Tetrakis-*O*-(phenylmethyl)- $\beta$ -*D*-galactopyranosyl fluoride** (major product).  
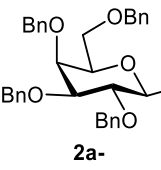
<sup>1</sup>H NMR (700 MHz,  $\text{CDCl}_3$ )  $\delta$  7.39 – 7.27 (m, 20H), 5.19 (dd,  $J = 53.1, 7.0$  Hz, 1H), 4.95 (d,  $J = 11.5$  Hz, 1H), 4.86 (d,  $J = 11.0$  Hz, 1H), 4.80 – 4.71 (m, 3H), 4.61 (d,  $J = 11.5$  Hz, 1H), 4.50 (d,  $J = 11.8$  Hz, 1H), 4.43 (d,  $J = 11.8$  Hz, 1H), 3.99 – 3.91 (m, 2H), 3.69 – 3.61 (m, 3H), 3.56 (ddd,  $J = 9.6, 2.9, 0.9$  Hz, 1H); <sup>13</sup>C NMR (176 MHz,  $\text{CDCl}_3$ )  $\delta$  138.3, 138.1, 138.0, 137.6, 128.4, 128.4, 128.3, 128.2, 128.1, 128.1, 127.9, 127.9, 127.7, 127.7, 127.6, 127.5, 110.2 (d,  $J = 215.4$  Hz,  $\beta$ -C<sub>1</sub>), 81.0 (d,  $J = 11.3$  Hz), 79.1 (d,  $J = 20.8$  Hz), 75.0, 75.0, 74.6, 73.6, 73.6, 73.1, 73.0, 68.3; <sup>19</sup>F NMR (564 MHz,  $\text{CDCl}_3$ )  $\delta$  -138.91 (dd,  $J = 54.0, 12.8$  Hz); IR (thin film,  $\text{cm}^{-1}$ ): 3030, 2870, 1496, 1453, 1363, 1302, 1208, 1099, 1053, 1027, 910, 820, 732, 695; HRMS (ESI<sup>+</sup>) ( $m/z$ ):  $[\text{M}+\text{Na}]^+$  calcd for  $\text{C}_{34}\text{H}_{35}\text{FNaO}_5$  565.2392, found 565.2353;  $[\alpha]_{\text{D}}^{23} = +29.8$  ( $c = 1.1$ ,  $\text{CH}_2\text{Cl}_2$ )



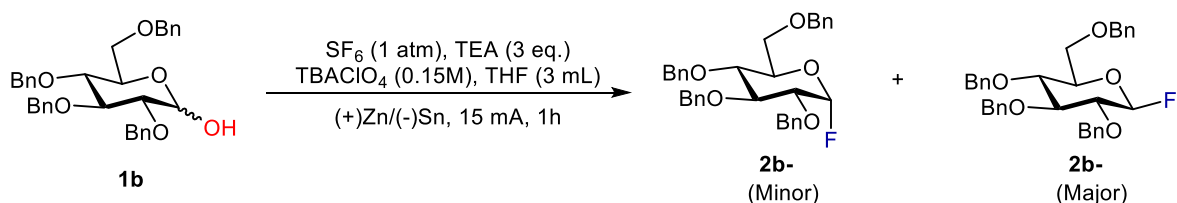

### Synthesis of 2,3,4,6-tetrakis-*O*-(phenylmethyl)-D-glucopyranosyl fluoride (**2b**)

The product was synthesized employing the general procedure. After a work-up, the reaction mixture was subjected to FCC (SiO<sub>2</sub>, pure hexane → 20% EtOAc in hexane) to afford **2b** as yellowish cloudy syrup in average of 98% yield ( $R_f = 0.38$  (20% EtOAc/Hex)). The NMR spectrum of the product is in a good agreement with our previously published NMR data.<sup>12</sup>

|                | 1 <sup>st</sup> Run                         | 2 <sup>nd</sup> Run                       |
|----------------|---------------------------------------------|-------------------------------------------|
| Isolated Yield | 96% (52.3 mg)<br>$\alpha : \beta = 1 : 1.4$ | 99% (54 mg)<br>$\alpha : \beta = 1 : 1.5$ |

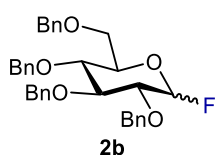

#### 2,3,4,6-Tetrakis-*O*-(phenylmethyl)-D-glucopyranosyl fluoride

(Isolated as  $\alpha : \beta = 1 : 1.4$ ) <sup>1</sup>H NMR (600 MHz, Chloroform-*d*)  $\delta$  7.42 – 7.28 (m, 41.4H), 7.21 – 7.14 (m, 4.8H), 5.59 (dd,  $J = 53.2, 2.6$  Hz, 1H, C<sub>1</sub>-H <sub>$\alpha$</sub> ), 5.29 (dd,  $J = 52.8, 6.8$  Hz, 1.4H, C<sub>1</sub>-H <sub>$\beta$</sub> ), 4.99 (d,  $J = 10.9$  Hz, 1H), 4.93 (d,  $J = 11.0$  Hz, 1.4H), 4.91 – 4.80 (m, 7.3H), 4.74 (d,  $J = 11.3$  Hz, 2.5H), 4.64 (dd,  $J = 16.1, 12.1$  Hz, 2.5H), 4.60 – 4.54 (m, 3.4H), 4.54 – 4.48 (m, 1.6H), 4.02 (t,  $J = 9.4$  Hz, 1H), 3.98 (dt,  $J = 10.2, 2.6$  Hz, 1H), 3.81 – 3.73 (m, 6.3H), 3.73 – 3.67 (m, 2.5H), 3.66 – 3.57 (m, 3.9H); <sup>19</sup>F NMR (564 MHz, CDCl<sub>3</sub>)  $\delta$  -138.06 (dd,  $J = 52.9, 11.9$  Hz, C<sub>1</sub>-F <sub>$\beta$</sub> ), -149.49 (dd,  $J = 53.1, 25.6$  Hz, C<sub>1</sub>-F <sub>$\alpha$</sub> ); IR (thin film, cm<sup>-1</sup>): 3030, 2867, 1496, 1453, 1360, 1308, 1208, 1155, 1088, 1062, 909, 821, 733, 695; HRMS (ESI+) ( $m/z$ ): [M+Na]<sup>+</sup> calcd for C<sub>34</sub>H<sub>35</sub>FNaO<sub>5</sub> 565.2392, found 565.2353

<sup>12</sup>Kim, S.; Khomutnyk, Y.; Bannykh, A.; Nagorny, P. *Org. Lett.* **2021**, 23, 1, 190-194



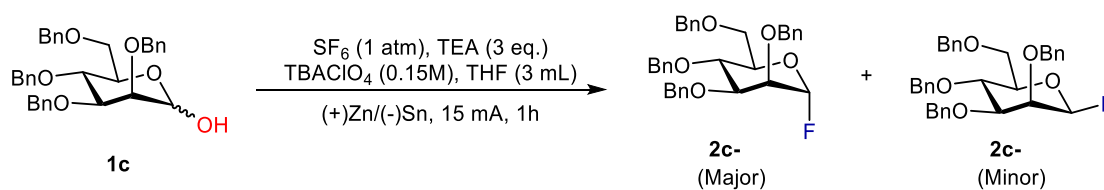

### Synthesis of 2,3,4,6-tetrakis-*O*-(phenylmethyl)-*D*-mannopyranosyl fluoride (**2c**)

The product was synthesized employing the general procedure. After a work-up, the reaction mixture was subjected to FCC (SiO<sub>2</sub>, pure hexane → 30% EtOAc in hexane) to afford **2c** as cloudy syrup in average of 95% yield ( $R_{f-\alpha} = 0.57$  (30% EtOAc/Hex),  $R_{f-\beta} = 0.5$  (30% EtOAc/Hex)). Stereochemistry of the product was confirmed by comparing with previously reported NMR spectra.<sup>13</sup>

|                | 1 <sup>st</sup> Run                        | 2 <sup>nd</sup> Run                        |
|----------------|--------------------------------------------|--------------------------------------------|
| Isolated Yield | 92% (50.1 mg)<br>$\alpha : \beta = 23 : 1$ | 97% (52.6 mg)<br>$\alpha : \beta = 20 : 1$ |

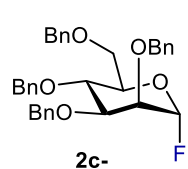

#### 2,3,4,6-Tetrakis-*O*-(phenylmethyl)- $\alpha$ -*D*-Mannopyranosyl fluoride (major product)

**<sup>1</sup>H NMR** (700 MHz, CDCl<sub>3</sub>)  $\delta$  7.38 – 7.27 (m, 18H), 7.20 – 7.17 (m, 2H), 5.61 (d,  $J = 50.8$  Hz, 1H), 4.89 (d,  $J = 10.8$  Hz, 1H), 4.81 (d,  $J = 12.3$  Hz, 1H), 4.72 – 4.64 (m, 4H), 4.55 (d,  $J = 12.4$  Hz, 2H), 4.09 (t,  $J = 9.5$  Hz, 1H), 3.93 (ddd,  $J = 10.1, 4.7, 1.8$  Hz, 1H), 3.89 (d,  $J = 8.9$  Hz, 2H), 3.79 (dd,  $J = 11.0, 4.7$  Hz, 1H), 3.73 (dd,  $J = 11.1, 1.9$  Hz, 1H); **<sup>13</sup>C NMR** (176 MHz, CDCl<sub>3</sub>)  $\delta$  138.2, 138.1, 138.1, 137.8, 128.4, 128.3, 128.3, 127.9, 127.9, 127.8, 127.7, 127.7, 127.6, 106.4 (d,  $J = 222.0$  Hz), 79.2, 75.1, 74.2, 74.2, 74.0, 73.6, 73.4, 73.4, 73.2, 72.6, 68.6; **<sup>19</sup>F NMR** (564 MHz, CDCl<sub>3</sub>)  $\delta$  -138.01 (d,  $J = 50.5$  Hz); **IR** (thin film, cm<sup>-1</sup>): 3030, 2863, 1496, 1453, 1363, 1311, 1183, 1094, 1026, 952, 801, 733, 695; **HRMS (ESI+)** ( $m/z$ ):  $[M+Na]^+$  calcd for C<sub>34</sub>H<sub>35</sub>FNaO<sub>5</sub> 565.2366, found 565.2358;  $[\alpha]_D^{24} = +12.0$  ( $c = 1.1$ , CH<sub>2</sub>Cl<sub>2</sub>)

<sup>13</sup>Zeng, J.; Vedachalam, S.; Xiang, S.; Liu, X-W. *Org. Lett.* **2011**, 13, 1, 42-45

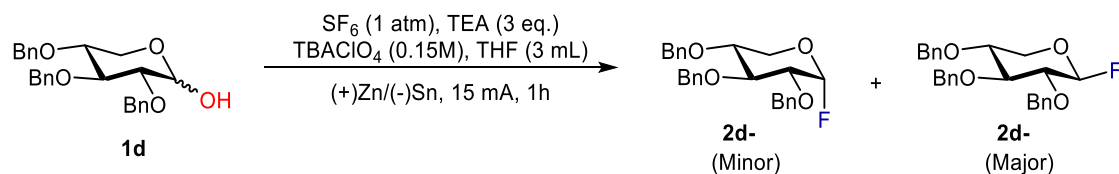

### Synthesis of 2,3,4-tris-*O*-(phenylmethyl)-*D*-xylopyranosyl fluoride (**2d**)

The product was synthesized employing the general procedure. The product was purified by FCC (SiO<sub>2</sub>, pure hexane → 20% EtOAc in hexane) to afford **2d** as yellowish white solid in average of 98% yield ( $R_f = 0.45$ (20% EtOAc/Hex)). The NMR spectrum of the product is in a good agreement with our previously published NMR data.<sup>14</sup>

|                | 1 <sup>st</sup> Run                         | 2 <sup>nd</sup> Run                          |
|----------------|---------------------------------------------|----------------------------------------------|
| Isolated Yield | 96% (40.4 mg)<br>$\alpha : \beta = 1 : 2.4$ | 100% (42.1 mg)<br>$\alpha : \beta = 1 : 2.7$ |

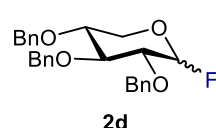

### 2,3,4-Tris-*O*-(phenylmethyl)-*D*-xylopyranosyl fluoride

(Isolated as  $\alpha : \beta = 1 : 2.4$  mixture) **<sup>1</sup>H NMR** (<sup>1</sup>H NMR (600 MHz, CDCl<sub>3</sub>)  $\delta$  7.43 – 7.28 (m, 46.8H), 5.48 (dd,  $J = 53.1, 2.7$  Hz, 1H, C<sub>1</sub>-H <sub>$\alpha$</sub> ), 5.35 (dd,  $J = 53.9, 5.6$  Hz, 2.4H, C<sub>1</sub>-H <sub>$\beta$</sub> ), 4.94 (s, 2H), 4.86 – 4.76 (m, 8.9H), 4.75 – 4.60 (m, 9.5H), 4.10 – 4.03 (m, 2.4H), 3.94 (t,  $J = 9.2$  Hz, 1H), 3.80 (dd,  $J = 11.1, 5.6$  Hz, 1H), 3.75 – 3.61 (m, 6.7H), 3.61 – 3.44 (m, 5.6H); **<sup>19</sup>F NMR** (564 MHz, CDCl<sub>3</sub>)  $\delta$  -134.41 (dd,  $J = 54.0, 12.6$  Hz, 2.4F, C<sub>1</sub>-F <sub>$\beta$</sub> ), -151.04 (dd,  $J = 53.1, 25.7$  Hz, 1F, C<sub>1</sub>-F <sub>$\alpha$</sub> ); **IR** (thin film, cm<sup>-1</sup>): 3030, 2869, 1496, 1453, 1361, 1257, 1208, 1162, 1088, 1027, 942, 733, 695; **HRMS (ESI+)** ( $m/z$ ): [M+Na]<sup>+</sup> calcd for C<sub>26</sub>H<sub>27</sub>FNaO<sub>4</sub> 445.1792, found 445.1780.

<sup>14</sup>Kim, S.; Khomutnyk, Y.; Bannykh, A.; Nagorny, P. *Org. Lett.* **2021**, 23, 1, 190-194

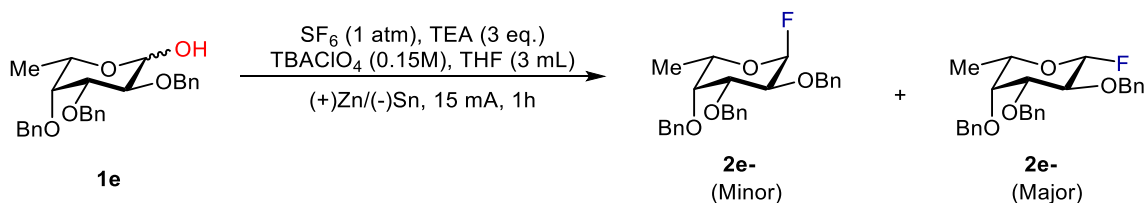

### Synthesis of 2,3,4-tris-*O*-(phenylmethyl)-L-fucopyranosyl fluoride (**2e**)

The product was synthesized employing the general procedure. The product was purified by FCC ( $\text{SiO}_2$ , pure hexane  $\rightarrow$  30% EtOAc in hexane) to afford **2e** as cloudy syrup in average of 91% yield ( $R_{f-\alpha} = 0.6$  (30% EtOAc/Hex),  $R_{f-\beta} = 0.53$  (30% EtOAc/Hex)).

|                | 1 <sup>st</sup> Run                         | 2 <sup>nd</sup> Run                       |
|----------------|---------------------------------------------|-------------------------------------------|
| Isolated Yield | 90% (39.4 mg)<br>$\alpha : \beta = 2.5 : 1$ | 91% (39.8 mg)<br>$\alpha : \beta = 2 : 1$ |

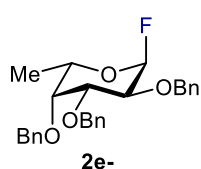

#### 2,3,4-Tris-*O*-(phenylmethyl)- $\alpha$ -L-fucopyranosyl fluoride (major product).

$^1\text{H NMR}$  (700 MHz, Chloroform-*d*)  $\delta$  7.41 – 7.27 (m, 15H), 5.57 (dd,  $J = 54.0, 2.8$  Hz, 1H), 4.99 (d,  $J = 11.5$  Hz, 1H), 4.85 (dd,  $J = 11.8, 3.9$  Hz, 2H), 4.75 (dd,  $J = 19.1, 11.8$  Hz, 2H), 4.66 (d,  $J = 11.5$  Hz, 1H), 4.08 – 4.00 (m, 2H), 3.94 (dd,  $J = 10.1, 2.7$  Hz, 1H), 3.70 (dd,  $J = 2.8, 1.2$  Hz, 1H), 1.17 (d,  $J = 6.5$  Hz, 3H);  $^{13}\text{C NMR}$  (176 MHz,  $\text{CDCl}_3$ )  $\delta$  138.5, 138.3, 138.1, 128.5, 128.4, 128.4, 128.3, 128.0, 127.8, 127.7, 127.7, 127.5, 106.4 (d,  $J = 224.5$  Hz,  $\alpha\text{-C}_1$ ), 78.8, 75.6 (d,  $J = 23.9$  Hz), 74.9, 73.7, 73.2, 69.1 (d,  $J = 3.2$  Hz), 16.5;  $^{19}\text{F NMR}$  (564 MHz,  $\text{CDCl}_3$ )  $\delta$  -149.68 (dd,  $J = 54.0, 25.3$  Hz); **IR** (thin film,  $\text{cm}^{-1}$ ): 3030, 2872, 1496, 1453, 1361, 1307, 1208, 1100, 1056, 1027, 912, 801, 732, 695; **HRMS (ESI+)** ( $m/z$ ):  $[\text{M}+\text{Na}]^+$  calcd for  $\text{C}_{27}\text{H}_{29}\text{FNaO}_4$  459.1892, found 459.1917;  $[\alpha]_{\text{D}}^{24} = -41.9$  ( $c=0.5$ ,  $\text{CH}_2\text{Cl}_2$ )

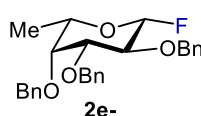

#### 2,3,4-tris-*O*-(phenylmethyl)- $\beta$ -L-fucopyranosyl fluoride (minor product).

$^1\text{H NMR}$  (700 MHz,  $\text{CDCl}_3$ )  $\delta$  7.41 – 7.28 (m, 15H), 5.16 (dd,  $J = 53.3, 7.1$  Hz, 1H), 5.00 (d,  $J = 11.6$  Hz, 1H), 4.87 (d,  $J = 10.9$  Hz, 2H), 4.80 (d,  $J = 11.7$  Hz, 1H), 4.79 (d,  $J = 10.8$  Hz, 1H), 4.74 (d,  $J = 11.8$  Hz, 1H), 4.69 (d,  $J = 11.6$  Hz, 1H), 3.94 (ddd,  $J = 13.3, 9.7, 7.0$  Hz, 1H), 3.60 (m, 2H), 3.55 (dd,  $J = 9.8, 2.9$  Hz, 1H), 1.26 (d,  $J = 6.4$  Hz, 3H);  $^{13}\text{C NMR}$  (176 MHz,  $\text{CDCl}_3$ )  $\delta$  138.2, 138.2, 138.2, 128.4, 128.3, 128.3, 128.2, 128.1, 127.7, 127.7, 127.6, 110.3 (d,  $J = 213.5$  Hz,  $\beta\text{-C}_1$ ), 81.4 (d,  $J = 11.7$  Hz), 79.0 (d,  $J = 20.6$  Hz), 75.8, 74.9, 74.7, 73.3, 70.8 (d,  $J = 4.9$  Hz), 16.6;  $^{19}\text{F NMR}$  (564 MHz,  $\text{CDCl}_3$ )  $\delta$  -139.13 (dd,  $J = 53.4, 13.2$  Hz); **IR** (thin film,  $\text{cm}^{-1}$ ): 3030, 2872, 1496, 1453, 1361, 1307, 1208, 1100, 1056, 1027, 912, 801, 732, 695; **HRMS (ESI+)** ( $m/z$ ):  $[\text{M}+\text{Na}]^+$  calcd for  $\text{C}_{27}\text{H}_{29}\text{FNaO}_4$  459.1892, found 459.1917;  $[\alpha]_{\text{D}}^{24} = -54.2$  ( $c=0.7$ ,  $\text{CH}_2\text{Cl}_2$ )

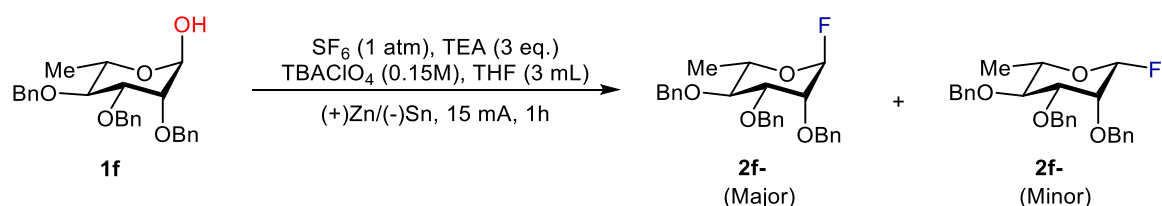

### Synthesis of 2,3,4-tris-*O*-(phenylmethyl)-*L*-rhamnopyranosyl fluoride (**2f**)

The product was synthesized employing the general procedure. The product was purified by FCC (SiO<sub>2</sub>, pure hexane → 20% EtOAc in hexane) to afford **2f** as yellowish syrup in average of 93% yield ( $R_{f-\alpha} = 0.57$  (20% EtOAc/Hex),  $R_{f-\beta} = 0.43$  (20% EtOAc/Hex)).

|                | 1 <sup>st</sup> Run                        | 2 <sup>nd</sup> Run                        |
|----------------|--------------------------------------------|--------------------------------------------|
| Isolated Yield | 93% (40.8 mg)<br>$\alpha : \beta = 20 : 1$ | 93% (40.5 mg)<br>$\alpha : \beta = 18 : 1$ |

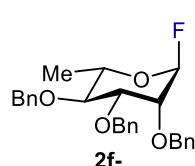

#### 2,3,4-Tris-*O*-(phenylmethyl)- $\alpha$ -*L*-rhamnopyranosyl fluoride (Major product)

**<sup>1</sup>H NMR** (700 MHz, CDCl<sub>3</sub>)  $\delta$  7.38 – 7.29 (m, 15H), 5.49 (dd,  $J = 50.6, 2.0$  Hz, 1H), 4.95 (d,  $J = 10.9$  Hz, 1H), 4.81 (d,  $J = 12.2$  Hz, 1H), 4.72 – 4.64 (m, 4H), 3.89 – 3.82 (m, 3H), 3.67 (t,  $J = 9.4$  Hz, 1H), 1.36 (d,  $J = 6.2$  Hz, 3H); **<sup>13</sup>C NMR** (176 MHz, CDCl<sub>3</sub>)  $\delta$  138.3, 138.2, 137.8, 128.5, 128.4, 128.4, 128.0, 128.0, 127.9, 127.7, 127.7, 127.7, 106.4 (d,  $J = 221.1$  Hz), 79.6, 79.2, 75.4, 73.7 (d,  $J = 35.2$  Hz), 73.4, 72.6, 70.6 (d,  $J = 2.3$  Hz), 17.9; **<sup>19</sup>F NMR** (471 MHz, CDCl<sub>3</sub>)  $\delta$  -137.07 (d,  $J = 50.6$  Hz); **IR** (thin film, cm<sup>-1</sup>): 3030, 2922, 1721, 1496, 1453, 1363, 1248, 1207, 1184, 1074, 1027, 911, 841, 734, 695; **HRMS (ESI+)** ( $m/z$ ):  $[M+Na]^+$  calcd for C<sub>27</sub>H<sub>29</sub>FNaO<sub>4</sub> 459.1948, found 459.1948;  $[\alpha]_D^{23.6} = +7.66$  ( $c = 1.1$ , CH<sub>2</sub>Cl<sub>2</sub>)

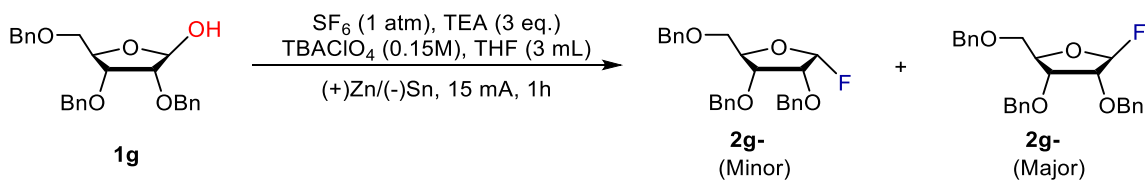

### Synthesis of 2,3,5-Tris-*O*-(phenylmethyl)- $\beta$ -D-ribofuranosyl fluoride (**2g**)

The product was synthesized employing the general procedure. The product was purified by FCC (SiO<sub>2</sub>, pure hexane  $\rightarrow$  30% EtOAc in hexane) to afford **2g** as yellowish oil in average of 94% yield ( $R_{f-\alpha}$  = 0.31 (20% EtOAc/Hex),  $R_{f-\beta}$  = 0.43 (20% EtOAc/Hex)).

|                | 1 <sup>st</sup> Run                        | 2 <sup>nd</sup> Run                        |
|----------------|--------------------------------------------|--------------------------------------------|
| Isolated Yield | 90% (37.9 mg)<br>$\alpha : \beta = 1 : 17$ | 98% (41.3 mg)<br>$\alpha : \beta = 1 : 16$ |

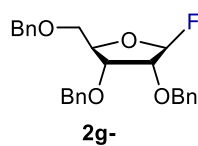

### 2,3,5-Tris-*O*-(phenylmethyl)- $\beta$ -D-ribofuranosyl fluoride (Major product).

**<sup>1</sup>H NMR** (700 MHz, CDCl<sub>3</sub>)  $\delta$  7.38 – 7.27 (m, 15H), 5.69 (d,  $J$  = 63.4 Hz, 1H,  $\beta$ -C<sub>1</sub>-H), 4.67 (s, 2H), 4.61 (d,  $J$  = 12.1 Hz, 1H), 4.56 (d,  $J$  = 13.6 Hz, 2H), 4.48 (d,  $J$  = 11.8 Hz, 1H), 4.44 (dtd,  $J$  = 8.1, 5.1, 2.7 Hz, 1H), 4.14 (ddd,  $J$  = 7.4, 4.5, 2.4 Hz, 1H), 4.00 (t,  $J$  = 4.2 Hz, 1H), 3.70 (dd,  $J$  = 11.0, 3.4 Hz, 1H), 3.60 (dd,  $J$  = 11.0, 5.3 Hz, 1H); **<sup>13</sup>C NMR** (176 MHz, CDCl<sub>3</sub>)  $\delta$  138.1, 137.4, 137.3, 128.5, 128.4, 128.3, 128.1, 128.0, 127.9, 127.6, 127.6, 112.5 (d,  $J$  = 224.4 Hz,  $\beta$ -C<sub>1</sub>), 82.3 (d,  $J$  = 2.6 Hz), 78.9 (d,  $J$  = 30.1 Hz), 73.3, 72.8, 72.8, 70.2; **<sup>19</sup>F NMR** (471 MHz, CDCl<sub>3</sub>)  $\delta$  -115.29 (dt,  $J$  = 63.1, 5.5 Hz,  $\beta$ -C<sub>1</sub>-F); **IR** (thin film, cm<sup>-1</sup>): 3030, 2862, 1726, 1496, 1454, 1358, 1308, 1257, 1208, 1096, 1026, 784, 735, 696; **HRMS (ESI+)** (m/z): [M+Na]<sup>+</sup> calcd for C<sub>26</sub>H<sub>27</sub>FN<sub>4</sub>O<sub>4</sub> 445.1792, found 445.1782; [ $\alpha$ ]<sub>D</sub><sup>24</sup> = +63.9 (c=0.7, CH<sub>2</sub>Cl<sub>2</sub>)

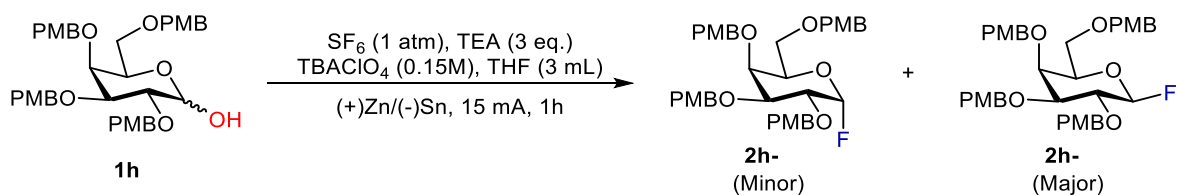

### Synthesis of 2,3,4,6-tetrakis-*O*-[(4-methoxyphenyl)methyl]-*D*-galactopyranosyl fluoride (**2h**)

The product was synthesized employing the general procedure. The product was purified by FCC ( $\text{SiO}_2$ , pure hexane  $\rightarrow$  30% EtOAc in hexane) to afford **2h** as cloudy oil in average of 96% yield ( $R_{f-\alpha} = 0.35$  (30% EtOAc/Hex),  $R_{f-\beta} = 0.33$  (30% EtOAc/Hex)).

|                | 1 <sup>st</sup> Run                         | 2 <sup>nd</sup> Run                         |
|----------------|---------------------------------------------|---------------------------------------------|
| Isolated Yield | 97% (64.1 mg)<br>$\alpha : \beta = 1 : 1.2$ | 96% (63.7 mg)<br>$\alpha : \beta = 1 : 1.1$ |

**2,3,4,6-Tetrakis-*O*-[(4-methoxyphenyl)methyl]- $\alpha$ -*D*-galactopyranosyl fluoride** (minor product). <sup>1</sup>H NMR (700 MHz,  $\text{CDCl}_3$ )  $\delta$  7.32 – 7.26 (m, 4H), 7.22 – 7.15 (m, 4H), 6.92 – 6.79 (m, 8H), 5.51 (dd,  $J = 53.7, 2.8$  Hz, 1H), 4.84 (d,  $J = 11.0$  Hz, 1H), 4.77 (d,  $J = 11.5$  Hz, 1H), 4.72 (d,  $J = 11.3$  Hz, 1H), 4.65 (dd,  $J = 13.8, 11.4$  Hz, 2H), 4.49 (d,  $J = 11.0$  Hz, 1H), 4.42 (d,  $J = 11.5$  Hz, 1H), 4.34 (d,  $J = 11.5$  Hz, 1H), 4.04 (t,  $J = 6.5$  Hz, 1H), 4.01 – 3.93 (m, 2H), 3.88 (dd,  $J = 10.1, 2.7$  Hz, 1H), 3.82 (s, 3H), 3.80 (s, 3H), 3.80 (s, 3H), 3.79 (s, 3H), 3.51 – 3.44 (m, 2H); <sup>13</sup>C NMR (176 MHz,  $\text{CDCl}_3$ )  $\delta$  159.3, 159.3, 159.2, 159.2, 130.6, 130.6, 130.2, 129.8, 129.6, 129.5, 129.2, 113.8, 113.7, 106.4 (d,  $J = 225.8$  Hz), 78.2, 75.3 (d,  $J = 23.5$  Hz), 74.4, 73.8, 73.4, 73.1, 72.7, 71.8 (d,  $J = 2.7$  Hz), 68.0, 55.3, 55.3, 55.2; <sup>19</sup>F NMR (564 MHz,  $\text{CDCl}_3$ )  $\delta$  -150.14 (dd,  $J = 53.7, 25.5$  Hz); IR (thin film,  $\text{cm}^{-1}$ ): 2912, 2835, 1611, 1585, 1512, 1463, 1442, 1422, 1362, 1301, 1244, 1172, 1096, 1031, 817, 757, 710, 665; HRMS (ESI+) (m/z):  $[\text{M}+\text{NH}_4]^+$  calcd for  $\text{C}_{38}\text{H}_{47}\text{FNO}_9$  680.3229, found 680.3281;  $[\alpha]_{\text{D}}^{23.3} = +26.9$  ( $c = 0.13$ ,  $\text{CH}_2\text{Cl}_2$ ).

**2,3,4,6-Tetrakis-*O*-[(4-methoxyphenyl)methyl]- $\beta$ -*D*-galactopyranosyl fluoride** (major product). <sup>1</sup>H NMR (700 MHz,  $\text{CDCl}_3$ )  $\delta$  7.28 (d,  $J = 8.6$  Hz, 2H), 7.26 (d,  $J = 6.1$  Hz, 2H), 7.20 (dd,  $J = 8.5, 5.5$  Hz, 4H), 6.87 – 6.85 (m, 6H), 6.83 (d,  $J = 8.6$  Hz, 2H), 5.13 (dd,  $J = 53.2, 7.0$  Hz, 1H), 4.83 (d,  $J = 11.2$  Hz, 1H), 4.76 (d,  $J = 10.7$  Hz, 1H), 4.69 (d,  $J = 10.6$  Hz, 1H), 4.64 (q,  $J = 11.4$  Hz, 2H), 4.52 (d,  $J = 11.3$  Hz, 1H), 4.42 (d,  $J = 11.4$  Hz, 1H), 4.34 (d,  $J = 11.4$  Hz, 1H), 3.91 – 3.85 (m, 1H), 3.82 (d,  $J = 2.7$  Hz, 1H), 3.81 (s, 3H), 3.80 (s, 3H), 3.80 (s, 3H), 3.79 (s, 3H), 3.61 – 3.57 (m, 2H), 3.56 – 3.52 (m, 1H), 3.49 – 3.46 (m, 1H); <sup>13</sup>C NMR (176 MHz,  $\text{CDCl}_3$ )  $\delta$  159.4, 159.3, 159.2, 159.2, 130.5, 130.3, 130.3, 129.8, 129.8, 129.6, 129.2, 113.8, 113.8, 113.8, 113.6, 110.3 (d,  $J = 215.3$  Hz,  $\beta$ -C<sub>1</sub>), 80.7 (d,  $J = 11.3$  Hz), 78.8 (d,  $J = 20.7$  Hz), 74.7, 74.6, 74.1, 73.7 (d,  $J = 4.8$  Hz), 73.2, 72.7, 72.5, 68.1, 55.3, 55.3, 55.2; <sup>19</sup>F NMR (471 MHz,  $\text{CDCl}_3$ )  $\delta$  -138.96 (dd,  $J = 53.0, 13.4$  Hz); IR (thin film,  $\text{cm}^{-1}$ ): 2912, 2835, 1611, 1585, 1512, 1463, 1442, 1422, 1362, 1301, 1244, 1172, 1096, 1031, 817, 756, 710, 664; HRMS (ESI+) (m/z):  $[\text{M}+\text{NH}_4]^+$  calcd for  $\text{C}_{38}\text{H}_{47}\text{FNO}_9$  680.3229, found 680.3281;  $[\alpha]_{\text{D}}^{24} = +39.8$  ( $c = 0.19$ ,  $\text{CH}_2\text{Cl}_2$ ).

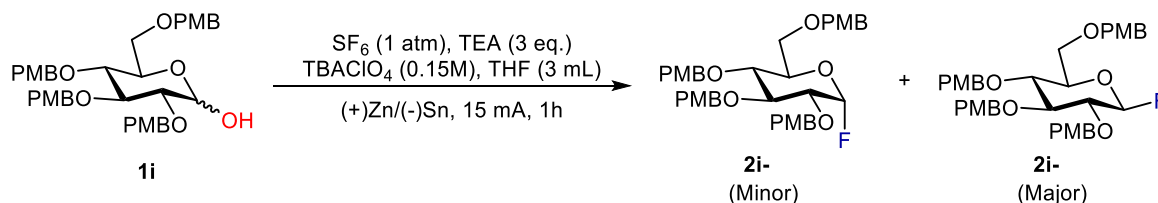

### Synthesis of 2,3,4,6-Tetrakis-*O*-[(4-methoxyphenyl)methyl]-*D*-glucopyranosyl fluoride (**2i**)

The product was synthesized employing the general procedure. The product was purified by FCC (SiO<sub>2</sub>, pure hexane → 30% EtOAc in hexane) to afford **2i** as clear oil in average of 96% yield ( $R_f = 0.33$  (30% EtOAc/Hex)). The NMR spectrum of the product is in a good agreement with our previously published NMR data.<sup>15</sup>

|                | 1 <sup>st</sup> Run                         | 2 <sup>nd</sup> Run                         |
|----------------|---------------------------------------------|---------------------------------------------|
| Isolated Yield | 99% (65.4 mg)<br>$\alpha : \beta = 1 : 1.4$ | 94% (62.3 mg)<br>$\alpha : \beta = 1 : 1.4$ |

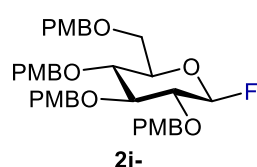

#### 2,3,4,6-Tetrakis-*O*-[(4-methoxyphenyl)methyl]- $\beta$ -*D*-glucopyranosyl fluoride

(Major product, Isolated as  $\alpha : \beta = 1 : 1.4$  mixture).

<sup>1</sup>H NMR (600 MHz, CDCl<sub>3</sub>)  $\delta$  7.35 – 7.20 (m, 14H), 7.10 – 7.01 (m, 4.6H), 6.93 – 6.77 (m, 18.3H), 5.49 (dd,  $J = 53.2, 2.6$  Hz, 1H, C<sub>1</sub>-H <sub>$\alpha$</sub> ), 5.23 (dd,  $J = 52.8, 6.8$  Hz, 1.4H, C<sub>1</sub>-H <sub>$\beta$</sub> ), 4.88 (d,  $J = 10.5$  Hz, 1H), 4.83 (d,  $J = 10.7$  Hz, 1.4H), 4.81 – 4.70 (m, 7H), 4.65 (dd,  $J = 11.1, 4.8$  Hz, 2.4H), 4.58 (dd,  $J = 11.8, 3.3$  Hz, 2.4H), 4.48 (d,  $J = 11.8$  Hz, 1.4H), 4.45 – 4.37 (m, 3.3H), 3.96 – 3.88 (m, 2.4H), 3.84 – 3.77 (m, 27.6H), 3.73 – 3.59 (m, 8.6H), 3.59 – 3.49 (m, 3.7H); <sup>19</sup>F NMR (564 MHz, CDCl<sub>3</sub>)  $\delta$  -138.29 (dd,  $J = 53.0, 12.0$  Hz, 1.4F, C<sub>1</sub>-F <sub>$\beta$</sub> ), -149.54 (dd,  $J = 53.3, 25.7$  Hz, 1F, C<sub>1</sub>-F <sub>$\alpha$</sub> ); IR (thin film, cm<sup>-1</sup>): 2907, 2835, 1611, 1585, 1512, 1463, 1441, 1359, 1302, 1244, 1172, 1083, 1031, 816, 758, 712, 637; HRMS (ESI+) (m/z): [M+Na]<sup>+</sup> calcd for C<sub>38</sub>H<sub>43</sub>FNao<sub>9</sub> 685.2783, found 685.2772; [ $\alpha$ ]<sub>D</sub><sup>24</sup> = +20.7 (c = 0.34, CH<sub>2</sub>Cl<sub>2</sub>).

<sup>15</sup>Kim, S.; Khomutnyk, Y.; Bannykh, A.; Nagorny, P. *Org. Lett.* **2021**, 23, 1, 190-194

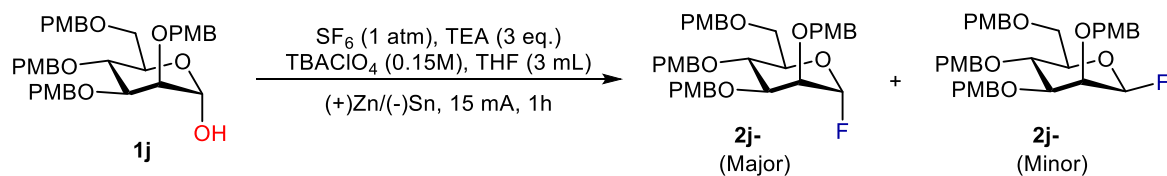

### Synthesis of 2,3,4,6-Tetrakis-*O*-[(4-methoxyphenyl)methyl]-*D*-mannopyranosyl fluoride (**2j**)

The product was synthesized employing the general procedure. The product was purified by FCC ( $\text{SiO}_2$ , pure hexane  $\rightarrow$  10% EtOAc in hexane) to afford **2j** as cloudy oil in average of 96% yield ( $R_{f-\alpha} = 0.53$  (40% EtOAc/Hex),  $R_{f-\beta} = 0.45$  (40% EtOAc/Hex)).

|                | 1 <sup>st</sup> Run                        | 2 <sup>nd</sup> Run                        |
|----------------|--------------------------------------------|--------------------------------------------|
| Isolated Yield | 97% (64.6 mg)<br>$\alpha : \beta = 25 : 1$ | 95% (62.9 mg)<br>$\alpha : \beta = 23 : 1$ |

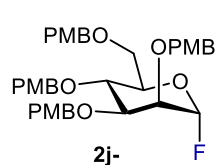

### 2,3,4,6-Tetrakis-*O*-[(4-methoxyphenyl)methyl]- $\alpha$ -*D*-mannopyranosyl fluoride

(Major Product)  $^1\text{H NMR}$  (500 MHz,  $\text{CDCl}_3$ )  $\delta$  7.29 – 7.24 (m, 6H), 7.06 (d,  $J = 8.6$  Hz, 2H), 6.90 – 6.79 (m, 8H), 5.53 (dd,  $J = 50.6, 1.6$  Hz, 1H), 4.75 (dd,  $J = 24.8, 11.2$  Hz, 2H), 4.64 – 4.53 (m, 4H), 4.44 (dd,  $J = 21.7, 11.1$  Hz, 2H), 4.00 – 3.95 (m, 1H), 3.86 (ddd,  $J = 10.0, 4.8, 1.8$  Hz, 1H), 3.80 (dd,  $J = 10.6, 4.1$  Hz, 14H), 3.71 (dd,  $J = 11.0, 4.7$  Hz, 1H), 3.66 (dd,  $J = 10.9, 2.0$  Hz, 1H);  $^{13}\text{C NMR}$  (126 MHz,  $\text{cdcl}_3$ )  $\delta$  159.4, 159.2, 159.2, 159.2, 130.4, 130.4, 130.2, 129.9, 129.6, 129.6, 129.3, 113.8, 113.7, 106.5 (d,  $J = 221.9$  Hz), 78.8, 74.7, 74.2, 74.2, 73.7, 73.1, 73.0, 72.9, 72.8, 72.2, 68.2, 55.3, 55.2, 55.2;  $^{19}\text{F NMR}$  (471 MHz,  $\text{CDCl}_3$ )  $\delta$  -137.88 (d,  $J = 50.6$  Hz); **IR** (thin film,  $\text{cm}^{-1}$ ): 2908, 2835, 1611, 1585, 1512, 1463, 1442, 1422, 1361, 1301, 1244, 1172, 1090, 1030, 950, 816, 756, 711, 667; **HRMS (ESI+)** ( $m/z$ ):  $[\text{M}+\text{Na}]^+$  calcd for  $\text{C}_{38}\text{H}_{43}\text{FNaO}_9$  685.2783, found 685.2753;  $[\alpha]_{\text{D}}^{24} = +7.45$  ( $c = 0.88, \text{CH}_2\text{Cl}_2$ ).



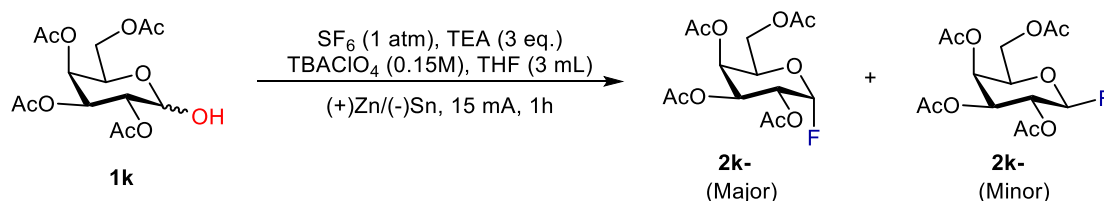

### Synthesis of 2,3,4,6-Tetra-*O*-acetyl- $\beta$ -D-galactopyranosyl fluoride (**2k**)

The product was synthesized employing a procedure for acetylated glycosides. After a work-up, the reaction mixture was subjected to FCC ( $\text{SiO}_2$ , pure hexane  $\rightarrow$  40% EtOAc in hexane) to afford **2k** as yellowish oil in average of 73% yield ( $R_{f-\alpha} = 0.38$  (40% EtOAc/Hex),  $R_{f-\beta} = 0.30$  (40% EtOAc/Hex)).

|                | 1 <sup>st</sup> Run                         | 2 <sup>nd</sup> Run                         |
|----------------|---------------------------------------------|---------------------------------------------|
| Isolated Yield | 73% (25.6 mg)<br>$\alpha : \beta = 1.9 : 1$ | 73% (25.6 mg)<br>$\alpha : \beta = 1.8 : 1$ |

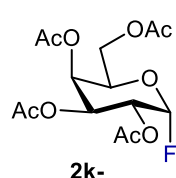

#### 2,3,4,6-Tetra-*O*-acetyl- $\alpha$ -D-galactopyranosyl fluoride (Minor product).

**<sup>1</sup>H NMR** (700 MHz, Chloroform-*d*)  $\delta$  5.80 (d,  $J = 53.3$  Hz, 1H), 5.53 (t,  $J = 2.5$  Hz, 1H), 5.37 (dt,  $J = 10.8, 2.8$  Hz, 1H), 5.19 (ddt,  $J = 23.8, 10.9, 2.6$  Hz, 1H), 4.41 (t,  $J = 6.7$  Hz, 1H), 4.18 – 4.09 (m, 2H), 2.16 (s, 3H), 2.12 (s, 3H), 2.06 (s, 3H), 2.01 (s, 3H); **<sup>13</sup>C NMR** (176 MHz,  $\text{CDCl}_3$ )  $\delta$  170.3, 170.2, 170.0, 169.9, 104.3 (d,  $J = 228.4$  Hz,  $\alpha\text{-C}_1$ ), 68.9 (d,  $J = 3.5$  Hz), 67.5, 67.3, 67.0, 61.3, 20.7, 20.6, 20.6; **<sup>19</sup>F NMR** (564 MHz,  $\text{CDCl}_3$ )  $\delta$  -150.78 (dd,  $J = 53.3, 23.9$  Hz); **IR** (thin film,  $\text{cm}^{-1}$ ): 2921, 2851, 1744, 1369, 1212, 1167, 1104, 1042, 951, 899; **HRMS (ESI+)** ( $m/z$ ):  $[\text{M}+\text{Na}]^+$  calcd for  $\text{C}_{14}\text{H}_{19}\text{FNaO}_9$  373.0911, found 373.0905;  $[\alpha]_{\text{D}}^{25} = +28.1$  ( $c = 0.4$ ,  $\text{CH}_2\text{Cl}_2$ )

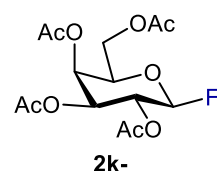

#### 2,3,4,6-Tetra-*O*-acetyl- $\beta$ -D-galactopyranosyl fluoride (Major product).

**<sup>1</sup>H NMR** (700 MHz, Chloroform-*d*)  $\delta$  5.44 – 5.40 (m, 1H), 5.35 – 5.21 (m, 2H), 5.04 (dt,  $J = 10.5, 2.8$  Hz, 1H), 4.24 – 4.18 (m, 2H), 4.05 (t,  $J = 6.6$  Hz, 1H), 2.17 (s, 3H), 2.10 (s, 3H), 2.06 (s, 3H), 2.01 (s, 3H); **<sup>13</sup>C NMR** (176 MHz,  $\text{CDCl}_3$ )  $\delta$  170.6, 170.0, 170.0, 169.3, 107.1 (d,  $J = 218.6$  Hz,  $\beta\text{-C}_1$ ), 71.2 (d,  $J = 4.7$  Hz), 69.9 (d,  $J = 10.6$  Hz), 68.8 (d,  $J = 24.9$  Hz), 66.4, 61.3, 20.7, 20.6, 20.5; **<sup>19</sup>F NMR** (564 MHz,  $\text{CDCl}_3$ )  $\delta$  -141.49 (dd,  $J = 51.0, 12.9$  Hz); **IR** (thin film,  $\text{cm}^{-1}$ ): 2921, 2851, 1744, 1369, 1212, 1167, 1104, 1042, 951, 899; **HRMS (ESI+)** ( $m/z$ ):  $[\text{M}+\text{Na}]^+$  calcd for  $\text{C}_{14}\text{H}_{19}\text{FNaO}_9$  373.0911, found 373.0905;  $[\alpha]_{\text{D}}^{25} = +6.0$  ( $c = 0.4$ ,  $\text{CH}_2\text{Cl}_2$ )

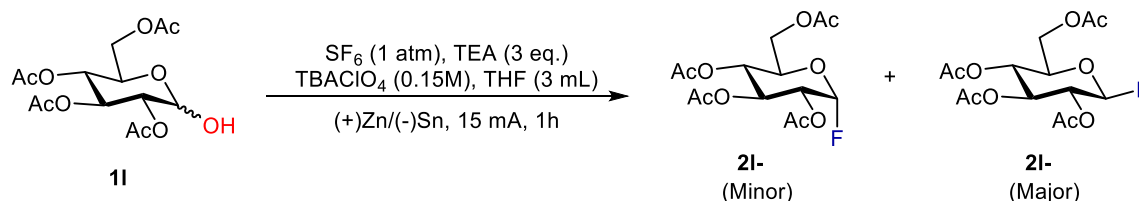

### Synthesis of 2,3,4,6-Tetra-*O*-acetyl-D-glucopyranosyl fluoride (**2I**)

The product was synthesized employing a procedure for acetylated glycosides. After a work-up, the reaction mixture was subjected to FCC (SiO<sub>2</sub>, pure hexane → 50% EtOAc in hexane) to afford **2I** as colorless oil in average of 76% yield ( $R_{f-\alpha} = 0.47$  (50% EtOAc/Hex),  $R_{f-\beta} = 0.43$  (50% EtOAc/Hex)).

|                | 1 <sup>st</sup> Run                         | 2 <sup>nd</sup> Run                         |
|----------------|---------------------------------------------|---------------------------------------------|
| Isolated Yield | 76% (26.7 mg)<br>$\alpha : \beta = 1 : 2.3$ | 75% (26.3 mg)<br>$\alpha : \beta = 1 : 2.5$ |

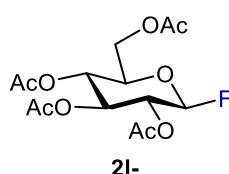

#### 2,3,4,6-Tetra-*O*-acetyl- $\alpha$ -D-glucopyranosyl fluoride (Minor product)

<sup>1</sup>H NMR (700 MHz, CDCl<sub>3</sub>)  $\delta$  5.75 (dd,  $J = 52.8, 2.8$  Hz, 1H), 5.50 (t,  $J = 9.9$  Hz, 1H), 5.16 (t,  $J = 10.0$  Hz, 1H), 4.96 (ddd,  $J = 24.2, 10.2, 2.8$  Hz, 1H), 4.29 (dd,  $J = 12.5, 4.1$  Hz, 1H), 4.19 (ddd,  $J = 10.3, 4.2, 2.2$  Hz, 1H), 4.15 (dd,  $J = 12.5, 2.2$  Hz, 1H), 2.11 (s, 3H), 2.10 (s, 6H), 2.05 (s, 3H), 2.03 (s, 3H); <sup>13</sup>C NMR (176 MHz, CDCl<sub>3</sub>)  $\delta$  170.5, 170.0, 169.9, 169.4, 103.7 (d,  $J = 229.5$  Hz,  $\alpha$ -C<sub>1</sub>), 70.2 (d,  $J = 24.5$  Hz), 69.8 (d,  $J = 4.3$  Hz), 69.4, 67.3, 61.2, 20.7, 20.6, 20.5; <sup>19</sup>F NMR (564 MHz, CDCl<sub>3</sub>)  $\delta$  -149.76 (dd,  $J = 52.8, 24.2$  Hz,  $\alpha$ -C<sub>1</sub>-F); IR (thin film, cm<sup>-1</sup>): 2918, 1743, 1434, 1367, 1208, 1160, 1103, 1033, 904, 779; HRMS (ESI+) (m/z): [M+Na]<sup>+</sup> calcd for C<sub>14</sub>H<sub>19</sub>FNaO<sub>9</sub> 373.0892, found 373.0899

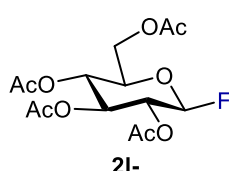

#### 2,3,4,6-Tetra-*O*-acetyl- $\beta$ -D-glucopyranosyl fluoride (Major product)

<sup>1</sup>H NMR (700 MHz, CDCl<sub>3</sub>)  $\delta$  5.36 (ddd,  $J = 52.0, 6.2, 1.8$  Hz, 1H), 5.20 (tt,  $J = 9.4, 4.8$  Hz, 2H), 5.12 – 5.08 (m, 1H), 4.29 – 4.24 (m, 1H), 4.24 – 4.20 (m, 1H), 3.90 (ddd,  $J = 7.5, 4.9, 2.5$  Hz, 1H), 2.10 (s, 3H), 2.10 (s, 3H), 2.04 (s, 3H), 2.03 (s, 3H); <sup>13</sup>C NMR (176 MHz, CDCl<sub>3</sub>)  $\delta$  170.6, 170.0, 169.3, 169.1, 106.2 (d,  $J = 219.6$  Hz,  $\beta$ -C<sub>1</sub>), 72.0 (d,  $J = 3.8$  Hz), 71.8 (d,  $J = 8.3$  Hz), 71.2 (d,  $J = 28.8$  Hz), 67.4, 61.7, 20.7, 20.6; <sup>19</sup>F NMR (564 MHz, CDCl<sub>3</sub>)  $\delta$  -137.24 (dd,  $J = 52.0, 10.4$  Hz,  $\beta$ -C<sub>1</sub>-F), -149.76 (dd,  $J = 52.8, 24.2$  Hz); IR (thin film, cm<sup>-1</sup>): 2918, 1743, 1434, 1367, 1208, 1160, 1103, 1033, 904, 779; HRMS (ESI+) (m/z): [M+Na]<sup>+</sup> calcd for C<sub>14</sub>H<sub>19</sub>FNaO<sub>9</sub> 373.0892, found 373.0899; [ $\alpha$ ]<sub>D</sub><sup>24</sup> = +13.6 (c = 0.5, CH<sub>2</sub>Cl<sub>2</sub>)

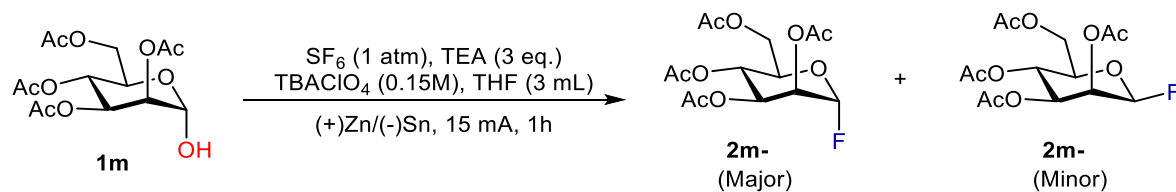

### Synthesis of 2,3,4,6-Tetra-*O*-acetyl-D-mannopyranosyl fluoride (**2m**)

The product was synthesized employing the general procedure. After a work-up, the reaction mixture was subjected to FCC ( $\text{SiO}_2$ , pure hexane  $\rightarrow$  40% EtOAc in hexane) to afford pure **2m** in average of 81% yield as cloudy oil ( $R_f = 0.33$  (40% EtOAc/Hex)). Stereochemistry of the products was confirmed by comparing with previously reported NMR spectra.<sup>16</sup>

|                | 1 <sup>st</sup> Run                        | 2 <sup>nd</sup> Run                        |
|----------------|--------------------------------------------|--------------------------------------------|
| Isolated Yield | 81% (28.4 mg)<br>$\alpha : \beta = 20 : 1$ | 80% (28.1 mg)<br>$\alpha : \beta = 20 : 1$ |

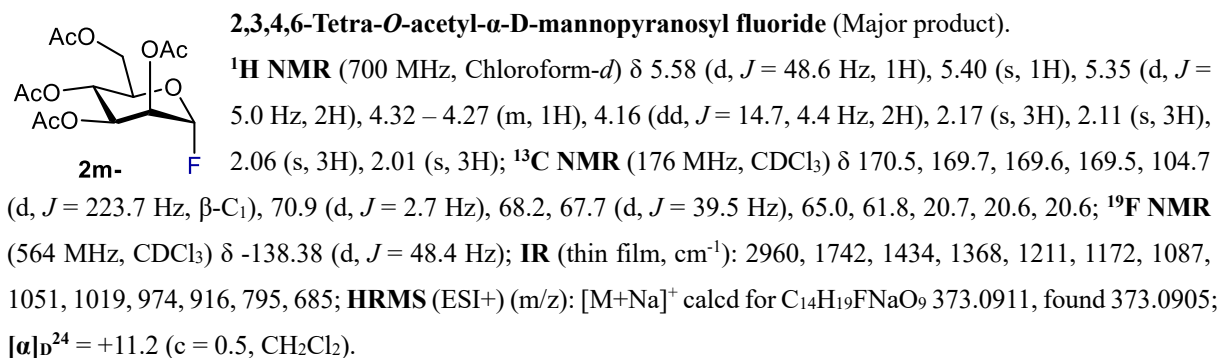

<sup>16</sup> Chambers, R. D.; Sandford, G.; Sparrowhawk, M. E.; Atherton, M. J. *J. Chem. Soc., Perkin Trans. 1*, **1996**, 1941-1944

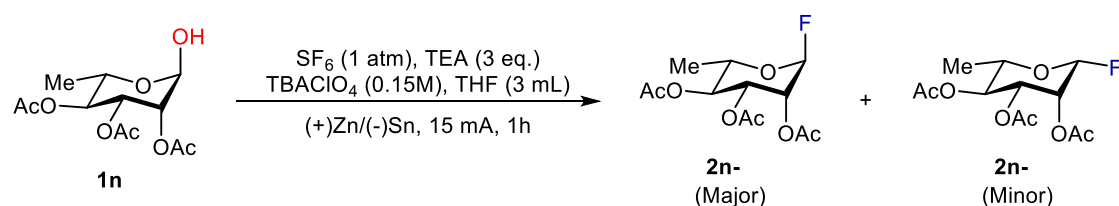

### Synthesis of 2,3,4-tri-*O*-acetyl-L-rhamnopyranosyl fluoride (**2n**)

The product was synthesized employing the general procedure. After a work-up, the reaction mixture was purified by FCC (SiO<sub>2</sub>, pure hexane → 40% EtOAc in hexane) to afford **2n** as colorless oil in average of 79% yield ( $R_f = 0.37$ (30% EtOAc/Hex)). Stereochemistry of the products was confirmed by comparing with previously reported NMR spectra.<sup>17</sup>

|                | 1 <sup>st</sup> Run                        | 2 <sup>nd</sup> Run                        |
|----------------|--------------------------------------------|--------------------------------------------|
| Isolated Yield | 82% (23.8 mg)<br>$\alpha : \beta = 22 : 1$ | 77% (22.5 mg)<br>$\alpha : \beta = 18 : 1$ |

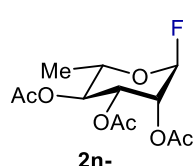

#### 2,3,4-Tri-*O*-acetyl- $\alpha$ -L-rhamnopyranosyl fluoride (Major product)

<sup>1</sup>H NMR (500 MHz, CDCl<sub>3</sub>)  $\delta$  5.49 (dd,  $J = 48.6, 1.9$  Hz, 1H), 5.38 (ddd,  $J = 3.2, 1.9, 0.9$  Hz, 1H), 5.29 (ddd,  $J = 10.2, 3.6, 1.7$  Hz, 1H), 5.12 (t,  $J = 10.0$  Hz, 1H), 4.04 (dq,  $J = 9.9, 6.2$  Hz, 1H), 2.16 (s, 3H), 2.06 (s, 3H), 2.00 (s, 3H), 1.27 (d,  $J = 6.3$  Hz, 3H); <sup>13</sup>C NMR (126 MHz, CDCl<sub>3</sub>)  $\delta$  169.8, 169.8, 169.7, 104.8 (d,  $J = 221.9$  Hz), 70.0, 68.9 (d,  $J = 3.0$  Hz), 68.2 (d,  $J = 1.7$  Hz), 68.0 (d,  $J = 40.3$  Hz), 20.7, 20.7, 20.6, 17.3; <sup>19</sup>F NMR (564 MHz, CDCl<sub>3</sub>)  $\delta$  -137.49 (d,  $J = 49.1$  Hz); IR (thin film, cm<sup>-1</sup>): 2925, 1748, 1605, 1509, 1457, 1369, 1293, 1242, 1214, 1173, 1038, 974, 929, 893, 830, 813, 793, 778, 684

<sup>17</sup>Nishiyama, K.; Esaki, S.; Deguchi, I.; Sugiyama, N.; Kamiya, S. *Biosci. Biotechnol. Biochem.* **1993**, *57*, 107–114

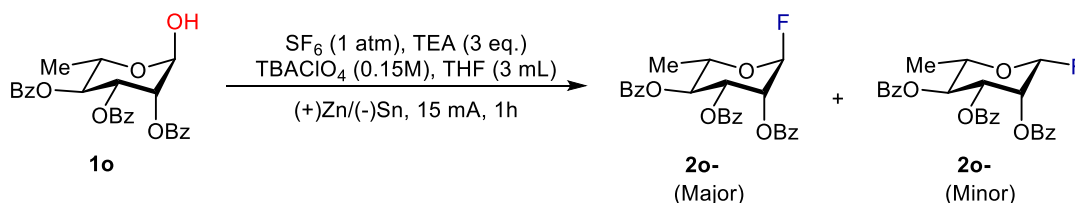

### Synthesis of 2,3,4-tri-*O*-benzoyl-L-rhamnopyranosyl fluoride (**2o**)

The product was synthesized employing the general procedure. After a work-up, the reaction mixture was purified by FCC (SiO<sub>2</sub>, pure hexane → 30% EtOAc in hexane) to afford **2o** as cloudy syrup in average of 84% yield ( $R_{f-\alpha} = 0.52$  (30% EtOAc/Hex),  $R_{f-\beta} = 0.46$  (30% EtOAc/Hex)).

|                | 1 <sup>st</sup> Run                        | 2 <sup>nd</sup> Run                        |
|----------------|--------------------------------------------|--------------------------------------------|
| Isolated Yield | 86% (41.2 mg)<br>$\alpha : \beta = 20 : 1$ | 82% (39.1 mg)<br>$\alpha : \beta = 21 : 1$ |

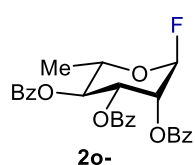

#### 2,3,4-Tri-*O*-benzoyl- $\alpha$ -L-rhamnopyranosyl fluoride

**<sup>1</sup>H NMR** (700 MHz, CDCl<sub>3</sub>)  $\delta$  8.10 (dd,  $J = 8.3, 1.3$  Hz, 2H), 8.00 – 7.97 (m, 2H), 7.83 (dd,  $J = 8.4, 1.4$  Hz, 2H), 7.63 (tt,  $J = 8.8, 1.3$  Hz, 1H), 7.55 – 7.52 (m, 3H), 7.52 – 7.49 (m, 2H), 7.43 (tt,  $J = 7.4, 1.3$  Hz, 1H), 7.42 – 7.38 (m, 2H), 5.87 – 5.81 (m, 2.5H, C<sub>4</sub>-H + C<sub>2</sub>-H + 1/2 C<sub>1</sub>-H), 5.76 (d,  $J = 1.8$  Hz, 0.5H, 1/2 C<sub>1</sub>-H), 5.74 (t,  $J = 9.9$  Hz, 1H, C<sub>3</sub>-H), 4.39 (dq,  $J = 9.9, 6.2$  Hz, 1H), 1.43 (d,  $J = 6.2$  Hz, 3H); **<sup>13</sup>C NMR** (176 MHz, cdcl<sub>3</sub>)  $\delta$  165.6, 165.4, 165.3, 133.7, 133.5, 133.3, 130.0, 129.8, 129.7, 129.0, 128.9, 128.9, 128.7, 128.5, 128.3, 104.9 (d,  $J = 222.4$  Hz,  $\alpha$ -C<sub>1</sub>-F), 70.7, 69.2 (d,  $J = 2.7$  Hz), 69.1 (d,  $J = 1.0$  Hz), 68.9 (d,  $J = 40.6$  Hz), 17.6; **<sup>19</sup>F NMR** (564 MHz, CDCl<sub>3</sub>)  $\delta$  -137.24 (d,  $J = 48.8$  Hz); **IR** (thin film, cm<sup>-1</sup>): 2985, 1724, 1601, 1584, 1451, 1315, 1276, 1258, 1173, 1091, 1068, 1026, 973, 910, 851, 793, 705, 685; **HRMS (ESI+)** (m/z): [M-F]<sup>+</sup> calcd for C<sub>27</sub>H<sub>23</sub>O<sub>7</sub><sup>+</sup> 459.1438, found 459.1427; [ $\alpha$ ]<sub>D</sub><sup>23.9</sup> = +166.9 (c (w/v%) = 4.15, CH<sub>2</sub>Cl<sub>2</sub>)

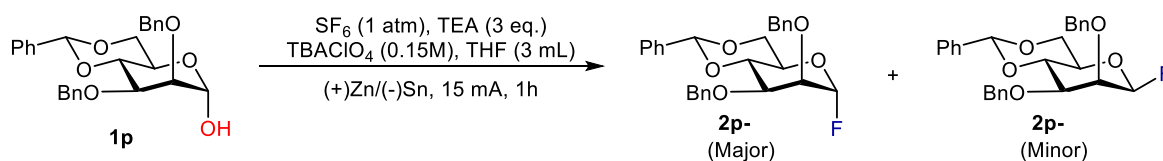

### Synthesis of 2,3-bis-*O*-(phenylmethyl)-4,6-*O*-[(*R*)-phenylmethylene]-*D*-mannopyranosyl fluoride (**2p**)

The product was synthesized employing the general procedure. The product was purified by FCC (SiO<sub>2</sub>, pure hexane → 20% EtOAc in hexane) to afford **2p** as cloudy oil in average of 96% yield ( $R_{f-\alpha} = 0.44$  (20% EtOAc/Hex)). Stereochemistry of the products was determined by comparing with previously reported NMR spectra.<sup>18</sup>

|                | 1 <sup>st</sup> Run                        | 2 <sup>nd</sup> Run                        |
|----------------|--------------------------------------------|--------------------------------------------|
| Isolated Yield | 97% (43.9 mg)<br>$\alpha : \beta = 24 : 1$ | 94% (42.2 mg)<br>$\alpha : \beta = 28 : 1$ |

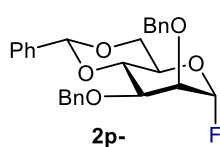

### 2,3-Bis-*O*-(phenylmethyl)-4,6-*O*-[(*R*)-phenylmethylene]- $\alpha$ -*D*-mannopyranosyl fluoride (major product).

<sup>1</sup>H NMR (700 MHz, CDCl<sub>3</sub>)  $\delta$  7.51 (d,  $J = 7.1$  Hz, 2H), 7.41 – 7.28 (m, 13H), 5.65 (s, 1H), 5.50 (d,  $J = 49.6$  Hz, 1H), 4.89 (d,  $J = 12.0$  Hz, 2H), 4.74 – 4.68 (m, 2H), 4.33 – 4.27 (m, 2H), 3.99 – 3.92 (m, 3H), 3.87 (td,  $J = 10.3, 2.0$  Hz, 1H); <sup>13</sup>C NMR (176 MHz, CDCl<sub>3</sub>)  $\delta$  138.3, 137.6, 137.4, 128.9, 128.5, 128.4, 128.2, 128.1, 128.1, 127.7, 127.6, 126.1, 107.0 (d,  $J = 223.7$  Hz), 101.6, 78.3, 75.5 (d,  $J = 2.5$  Hz), 75.0, 74.8, 74.2, 73.5, 68.3, 66.1 (d,  $J = 2.4$  Hz); <sup>19</sup>F NMR (471 MHz, CDCl<sub>3</sub>)  $\delta$  -137.06 (d,  $J = 49.7$  Hz); IR (thin film, cm<sup>-1</sup>): 2919, 1454, 1372, 1313, 1214, 1166, 1099, 1054, 1006, 965, 925, 799, 735, 696; HRMS (ESI<sup>+</sup>) (m/z): [M+Na]<sup>+</sup> calcd for C<sub>27</sub>H<sub>27</sub>FNao<sub>5</sub> 473.1692, found 473.1729; [ $\alpha$ ]<sub>D</sub><sup>23</sup> = -17.4 (c = 0.6, CH<sub>2</sub>Cl<sub>2</sub>).

<sup>18</sup>Lee, Y. J.; Baek, J. Y.; Lee, B.-Y.; Kang, S. S.; Park, H.-S.; Jeon, H. B.; Kim, K. S. Carbohydrate Research. **2006**. 341(10). 1708-1716

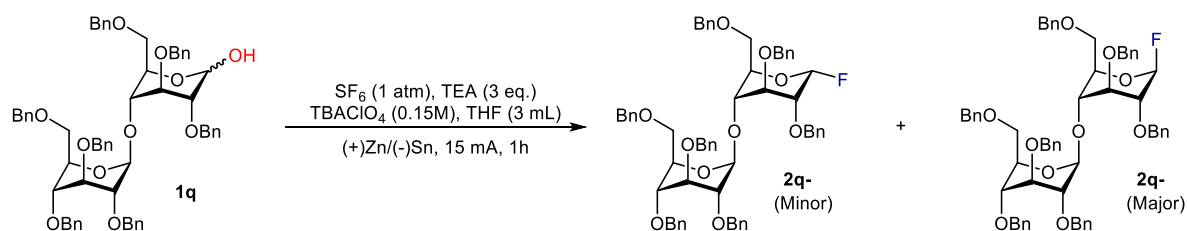

### Synthesis of 2,3,6-Tris-O-(phenylmethyl)-4-O-[2,3,4,6-tetrakis-O-(phenylmethyl)- $\beta$ -D-glucopyranosyl]-D-glucopyranosyl fluoride (2q)

The product was synthesized employing the general procedure. The product was purified by FCC (SiO<sub>2</sub>, pure hexane  $\rightarrow$  30% EtOAc in hexane) to afford **2q** as white solid in average of 84% yield ( $R_{f-\alpha}$  = 0.58 (30% EtOAc/Hex),  $R_{f-\beta}$  = 0.57 (30% EtOAc/Hex)).

|                | 1 <sup>st</sup> Run                         | 2 <sup>nd</sup> Run                         |
|----------------|---------------------------------------------|---------------------------------------------|
| Isolated Yield | 80% (78.1 mg)<br>$\alpha : \beta = 1 : 3.4$ | 88% (85.8 mg)<br>$\alpha : \beta = 1 : 3.2$ |

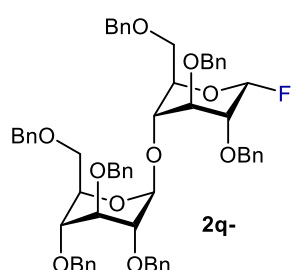

### 2,3,6-Tris-O-(phenylmethyl)-4-O-[2,3,4,6-tetrakis-O-(phenylmethyl)- $\alpha$ -D-glucopyranosyl]-D-glucopyranosyl fluoride (minor product).

**<sup>1</sup>H NMR** (700 MHz, CDCl<sub>3</sub>)  $\delta$  7.40 (d,  $J$  = 6.5 Hz, 2H), 7.33 – 7.20 (m, 31H), 7.19 (d,  $J$  = 7.4 Hz, 2H), 5.48 (dd,  $J$  = 53.4, 2.7 Hz, 1H,  $\alpha$ -C<sub>1</sub>-H), 5.12 (dd,  $J$  = 11.4, 2.0 Hz, 1H), 4.89 – 4.86 (m, 1H), 4.83 – 4.72 (m, 6H), 4.63 (dd,  $J$  = 11.9, 2.0 Hz, 1H), 4.56 (d,  $J$  = 11.5 Hz, 2H), 4.44 (dd,  $J$  = 12.3, 2.0 Hz, 1H), 4.39 (ddd,  $J$  = 11.7, 6.9, 2.8 Hz, 3H), 4.07 – 4.03 (m, 1H), 3.90 – 3.84 (m, 2H), 3.80 (dd,  $J$  = 10.1, 2.2 Hz, 1H), 3.73 (d,  $J$  = 10.9 Hz, 1H), 3.61 (t,  $J$  = 8.8 Hz, 1H), 3.58 – 3.55 (m, 1H), 3.48 (ddd,  $J$  = 25.5, 19.6, 10.3 Hz, 4H), 3.39 – 3.35 (m, 1H), 3.33 – 3.29 (m, 1H); **<sup>13</sup>C NMR** (176 MHz, CDCl<sub>3</sub>)  $\delta$  139.2, 138.6, 138.5, 138.3, 138.3, 137.9, 137.6, 128.5, 128.4, 128.4, 128.4, 128.3, 128.2, 128.1, 128.0, 128.0, 127.9, 127.8, 127.8, 127.8, 127.8, 127.7, 127.6, 127.6, 127.3, 127.2, 105.8 (d,  $J$  = 226.8 Hz,  $\alpha$ -C<sub>1</sub>), 102.5, 84.9, 82.7, 79.8, 78.2 (d,  $J$  = 24.3 Hz), 78.0, 75.6, 75.6, 75.4, 75.2, 75.0, 74.8, 73.8, 73.3, 72.6 (d,  $J$  = 4.2 Hz), 69.0, 69.0, 67.1; **<sup>19</sup>F NMR** (471 MHz, CDCl<sub>3</sub>)  $\delta$  -149.55 (dd,  $J$  = 53.4, 25.8 Hz); **IR** (thin film, cm<sup>-1</sup>): 1497, 1453, 1361, 1072, 1029, 1005, 908, 753, 731, 695, 665; **HRMS (ESI+)** ( $m/z$ ): [M+NH<sub>4</sub>]<sup>+</sup> calcd for C<sub>61</sub>H<sub>67</sub>FNO<sub>10</sub> 992.4738, found 992.4733; [ $\alpha$ ]<sub>D</sub><sup>23.6</sup> = +23.1 ( $c$  = 0.23, CH<sub>2</sub>Cl<sub>2</sub>)

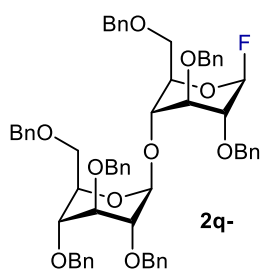

**2,3,6-Tris-O-(phenylmethyl)-4-O-[2,3,4,6-tetrakis-O-(phenylmethyl)-β-D-glucopyranosyl]-β-D-glucopyranosyl fluoride (major product).**

**<sup>1</sup>H NMR** (700 MHz, CDCl<sub>3</sub>) δ 7.37 (d, *J* = 5.2 Hz, 2H), 7.34 – 7.22 (m, 31H), 7.19 (d, *J* = 7.3 Hz, 2H), 5.25 (dd, *J* = 53.5, 6.5 Hz, 1H, β-C<sub>1</sub>-H), 5.05 (d, *J* = 11.4 Hz, 1H), 4.89 (d, *J* = 10.9 Hz, 1H), 4.81 (d, *J* = 10.6 Hz, 2H), 4.75 (dd, *J* = 17.7, 9.3 Hz, 4H), 4.69 (d, *J* = 11.2 Hz, 1H), 4.58 (dd, *J* = 17.0, 11.4 Hz, 2H), 4.50 (d, *J* = 7.9 Hz, 1H), 4.47 – 4.39 (m, 3H), 4.13 (t, *J* = 8.9 Hz, 1H), 3.84 (dd, *J* = 11.1, 3.4 Hz, 1H), 3.72 – 3.48 (m, 8H), 3.39 (t, *J* = 8.5 Hz, 1H), 3.30 (dd, *J* = 10.4, 4.0 Hz, 1H); **<sup>13</sup>C NMR** (176 MHz, CDCl<sub>3</sub>) δ 138.9, 138.5, 138.4, 138.4, 138.2, 137.8, 137.8, 128.4, 128.4, 128.4, 128.3, 128.3, 128.2, 128.1, 128.1, 127.9, 127.8, 127.8, 127.8, 127.8, 127.8, 127.7, 127.7, 127.6, 127.6, 127.5, 127.4, 127.3, 109.5 (d, *J* = 215.9 Hz, β-C<sub>1</sub>), 102.3, 84.9, 82.7, 81.3 (d, *J* = 10.3 Hz), 80.5 (d, *J* = 23.0 Hz), 77.9, 75.8, 75.6, 75.0, 74.9 (d, *J* = 3.7 Hz), 74.8, 74.7, 74.3, 73.4, 73.3, 68.9, 67.7; **<sup>19</sup>F NMR** (471 MHz, CDCl<sub>3</sub>) δ -135.75 (dd, *J* = 53.5, 12.3 Hz); **IR** (thin film, cm<sup>-1</sup>): 1497, 1453, 1361, 1072, 1029, 1005, 908, 753, 731, 695, 665; **HRMS (ESI+)** (*m/z*): [M+NH<sub>4</sub>]<sup>+</sup> calcd for C<sub>61</sub>H<sub>67</sub>FNO<sub>10</sub> 992.4738, found 992.4733; **[α]<sub>D</sub><sup>23</sup>** = +25.9 (*c* = 1.1, CH<sub>2</sub>Cl<sub>2</sub>)



**d. Summary of  $\alpha$ : $\beta$  ratio for 1a-q and 2a-q****Table S7.** Initial and final  $\alpha$ : $\beta$  ratios of the starting materials 1a-q and products 2a-q

| Substrate | Initial dr of <b>1a-q</b> determined by $^1\text{H}$ NMR | dr of <b>2a-q</b> determined by $^{19}\text{F}$ NMR |
|-----------|----------------------------------------------------------|-----------------------------------------------------|
| <b>a</b>  | alpha only                                               | 1:1.6                                               |
| <b>b</b>  | 4.8:1                                                    | 1:1.5                                               |
| <b>c</b>  | alpha only                                               | 22:1                                                |
| <b>d</b>  | 5.5:1                                                    | 1:2.6                                               |
| <b>e</b>  | 2.7:1                                                    | 2.3:1                                               |
| <b>f</b>  | alpha only                                               | 19:1                                                |
| <b>g</b>  | beta only                                                | 1:17                                                |
| <b>h</b>  | 3.4:1                                                    | 1:1.2                                               |
| <b>i</b>  | 3:1                                                      | 1:1.4                                               |
| <b>j</b>  | alpha only                                               | 24:1                                                |
| <b>k</b>  | 4.2:1                                                    | 1.9:1                                               |
| <b>l</b>  | 5:1                                                      | 1:2.4                                               |
| <b>m</b>  | alpha only                                               | 20:1                                                |
| <b>n</b>  | alpha only                                               | 20:1                                                |
| <b>o</b>  | 6.8:1                                                    | 21:1                                                |
| <b>p</b>  | alpha only                                               | 26:1                                                |
| <b>q</b>  | 1.9:1                                                    | 1:3.3                                               |

### e. Comparison with DAST method

| Product   | Our method                     | DAST method            |                                         |
|-----------|--------------------------------|------------------------|-----------------------------------------|
|           |                                | $\alpha:\beta$ of SM   | Yield                                   |
| <b>2a</b> | 94% ( $\alpha:\beta = 1:1.6$ ) | $\alpha:\beta = 1.7:1$ | 91% ( $\alpha:\beta = 3:5$ )            |
| <b>2b</b> | 98% ( $\alpha:\beta = 1:1.5$ ) | $\alpha:\beta = 1.7:1$ | 89% ( $\alpha:\beta = 5:1$ )            |
| <b>2c</b> | 95% ( $\alpha:\beta = 22:1$ )  | $\alpha$ only          | 91% ( $\alpha$ only)                    |
| <b>2d</b> | 98% ( $\alpha:\beta = 1:2.6$ ) | -                      | -                                       |
| <b>2e</b> | 95% ( $\alpha:\beta = 2.3:1$ ) | $\alpha:\beta$ mixture | 100% ( $\alpha:\beta$ mixture)          |
| <b>2f</b> | 93% ( $\alpha:\beta = 19:1$ )  | -                      | -                                       |
| <b>2g</b> | 94% ( $\alpha:\beta = 1:17$ )  | $\alpha:\beta$ mixture | 95% ( $\alpha:\beta = 1:19$ to $1:99$ ) |
| <b>2h</b> | 96% ( $\alpha:\beta = 1:1.2$ ) | $\alpha:\beta$ mixture | 93% ( $\alpha:\beta$ mixture)           |
| <b>2i</b> | 96% ( $\alpha:\beta = 1:1.4$ ) | -                      | -                                       |
| <b>2j</b> | 96% ( $\alpha:\beta = 24:1$ )  | -                      | -                                       |
| <b>2k</b> | 73% ( $\alpha:\beta = 1.9:1$ ) | -                      | -                                       |
| <b>2l</b> | 76% ( $\alpha:\beta = 1:2.4$ ) | $\alpha:\beta = 1:2$   | 92% ( $\alpha:\beta = 3:1$ )            |
| <b>2m</b> | 81% ( $\alpha:\beta = 20:1$ )  | -                      | -                                       |
| <b>2n</b> | 79% ( $\alpha:\beta = 3:1$ )   | -                      | -                                       |
| <b>2o</b> | 84% ( $\alpha:\beta = 21:1$ )  | -                      | -                                       |
| <b>2p</b> | 96% ( $\alpha:\beta = 26:1$ )  | -                      | -                                       |
| <b>2q</b> | 84% ( $\alpha:\beta = 1:3.3$ ) | -                      | -                                       |

#### References:

**2a, 2b, 2c:** Zeng, J.; Vedachalam, S.; Xiang, S.; Liu, X.-W. *Org. Lett.* **2011**, 13, 1, 42-45

**2e:** Guan, X.; Chaffey, P. K.; Zeng, C.; Greene, E. R.; Chen, L.; Drake, M. R.; Chen, C.; Groobman, A.; Resch, M. G.; Himmel, M. E.; Beckham, G. T.; Tan, Z. *Chem. Sci.* **2015**, 6, 7185

**2g:** Ginisty, M.; Gravier-Pelletier, C.; Merrer, Y. L. *Tetrahedron: Asymmetry.* **2006**, 17, 142-150

**2h:** Li, X.; Wu, P.; Cheng, S.; Lv, X. *J. Med. Chem.* **2021**, 55, 6, 2702-2710

**2l:** Zagrobelny, M.; Olsen, C. E.; Pentzold, S.; Fürstenberg-Hägg, J.; Jørgensen, K.; Bak, S.; Møller, B. L.; Motawia, M. S. *Insect Biochemistry and Molecular Biology.* **2014**, 44, 44-53

## f. Large Scale Batch Synthesis

### 5 Gram Scale Synthesis

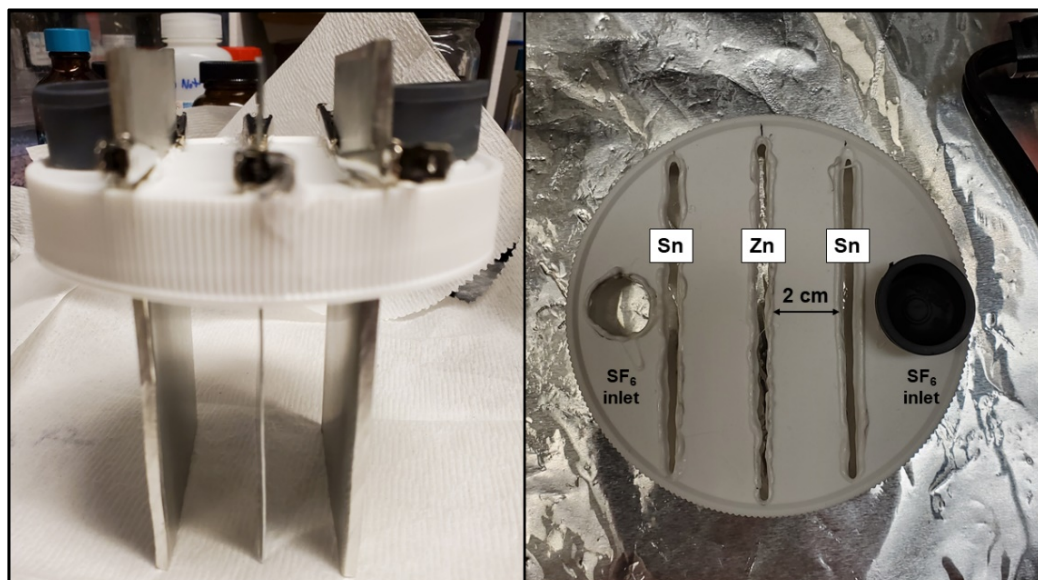

Figure S4. Experimental setup adopted from Baran Group's Work<sup>19</sup>

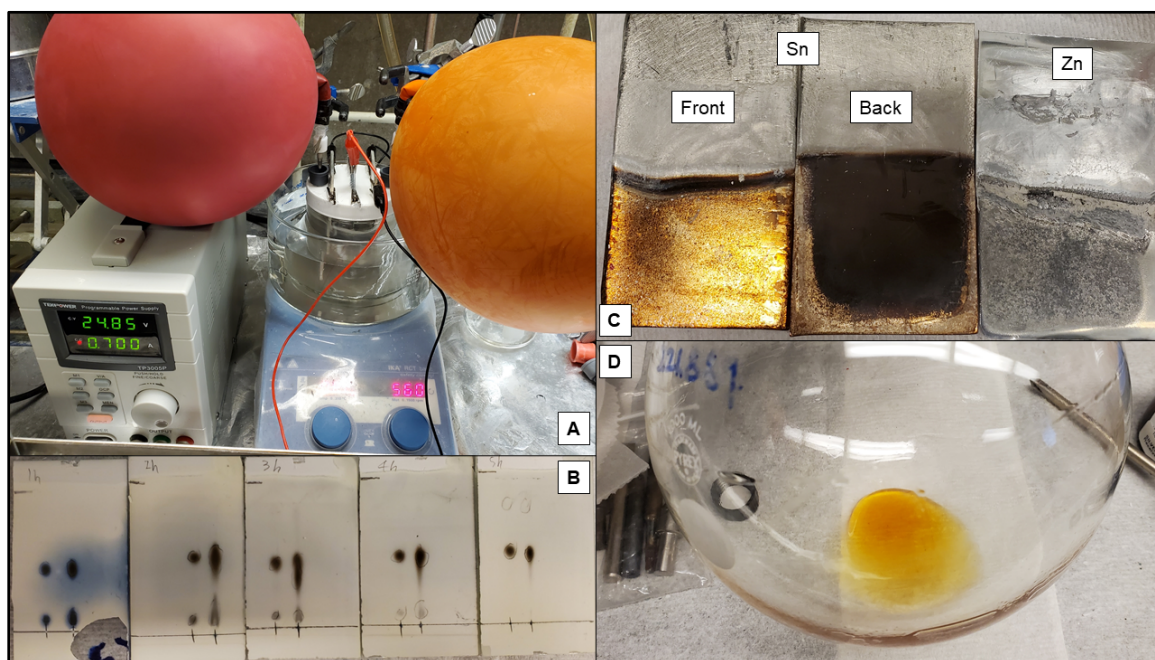

Figure S5. (A) Reaction setup (B) Reaction progress monitored by TLC (C) Electrodes after the reaction (D) Isolated product

<sup>19</sup>Hu, P.; Peters, B. K.; Malapit, C. A.; Vantourout, J. C.; Wang, P.; Li, J.; Mele, L.; Echeverria, P.-G.; Minter, S. D.; Baran, P. S. *J. Am. Chem. Soc.* **2020**, *142*, 50, 20979-20986

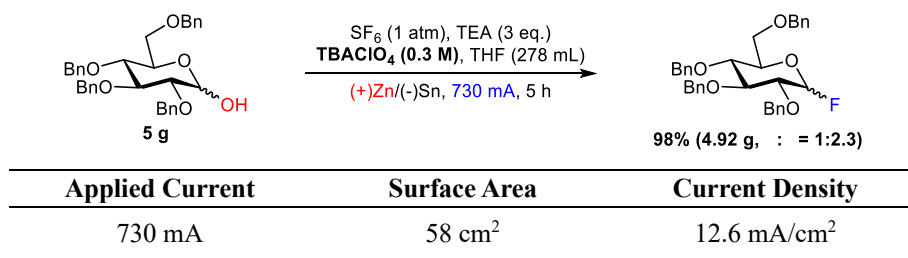

To achieve high current density, the experimental setup was adopted from Baran group's large scale setup (**Fig. SI-4**).<sup>19</sup> Electrodes were prepared by cutting off tin plate (3.2 mm thickness, 5.8 cm x 10 cm x 2) and zinc plate (0.5 mm thickness, 6.0 cm x 10 cm) and 5.0 cm height of the electrodes were submerged in the solution. Due to the voltage limit (31 V) of the DC power supply, the concentration of electrolyte was doubled (0.3 M). Into an oven dried glass jar containing a stir bar, 2,3,4,6-tetrakis-*O*-(phenylmethyl)-D-glucopyranoside **1a** (9.25 mmol, 1.0 equiv.), tetrabutylammonium perchlorate (83.4 mmol, 0.3 M) were dissolved in dry THF (278 mL). After the addition of triethylamine (27.7 mmol, 3.0 equiv.), the reaction was placed inside a water bath (to relieve the heat generated during electrolysis) and stirred until the solution became homogeneous. The reaction was then sparged with SF<sub>6</sub> balloons for 1 minute before the electric current was applied, and then the rest of the reaction. The electric current was applied for 6 hours, and then the reaction mixture was diluted with 300 mL of ethyl acetate. The diluted mixture was then washed with 1N HCl (250 mL x 3), NaHCO<sub>3</sub> (250 mL x 1), water (250 mL x 5), and brine (250 mL x 1). The extracted organic layer was dried with Na<sub>2</sub>SO<sub>4</sub> and concentrated *in vacuo*, which was subjected to FCC to afford 2,3,4,6-tetrakis-*O*-(phenylmethyl)-D-glucopyranosyl fluoride **2a** in 98 % yield (4.92 g,  $\alpha : \beta = 1 : 2.3$ ) as yellow syrup.

## IV. Cyclic Voltammetry Studies

### General information

Cyclic voltammetry studies were performed with the Pine WaveNow<sup>XV</sup> Potentiostat/Galvanostat. All experiments were measured under slight argon stream. SF<sub>6</sub> was added by sparging SF<sub>6</sub> gas to the solution for 1 minute. Electrodes were polished with 1000-grit sandpaper and cleaned by sonicating in acetone, and they were dried under high vacuum before use. All electrolytes were dried under high vacuum before use. THF was prepared from Innovative Technology PureSolv solvent drying system and dry acetonitrile was purchased from Alfa Aesar. All solvents were degassed with argon before use.

#### a. Identifying half reduction potential of SF<sub>6</sub>

Scan range: -3.0 V to 0.0 V (-3.1 V to -0.5 V is shown on the graph after voltage reference with Fc<sup>+</sup>/Fc)

Scan rates: 20 mV/s

Electrolyte: TBAClO<sub>4</sub> (0.1M) / Solvent: acetonitrile (12 mL)

Working electrode: 0.635 mm diameter Pt wire (0.6 cm submerged)

Counter electrode: Pt plate (0.8 cm<sup>2</sup>)

Reference electrode: Ag/AgCl (voltage is referenced to ferrocene [0.001 M])

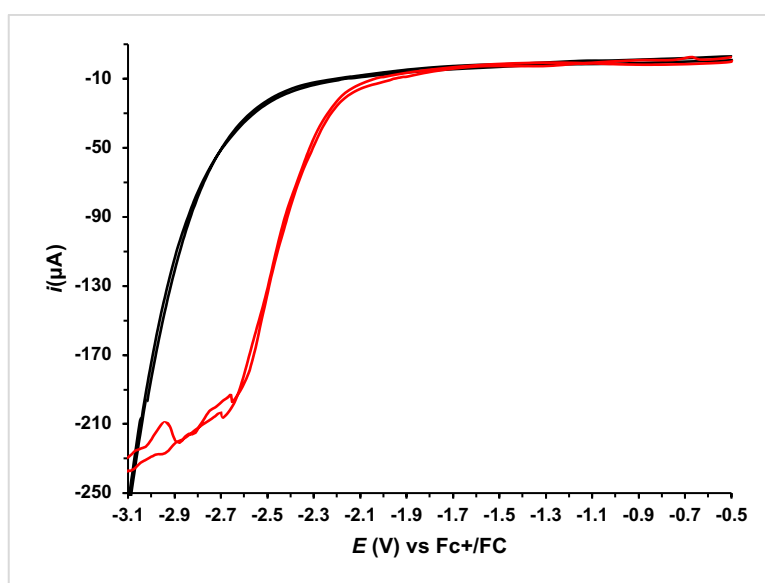

**Figure S6.** Blank is shown in black line and the reduction of SF<sub>6</sub> is shown in red line. Voltage was corrected by ferrocene (0.001 M)

We first attempted to measure the half reduction potential of SF<sub>6</sub> by adopting the CV experimental set-up from Magnier group.<sup>20</sup> The voltammogram shows  $E_{\text{red}1/2} = -2.44$  V (vs. Fc<sup>+</sup>/Fc).

Half reduction potential of SF<sub>6</sub> reference to SCE: -1.99 V vs. SCE

<sup>20</sup>Bouvet, S.; Pegot, B.; Sengmany, S.; Gall, E. L.; Leonel, E.; Goncalves, A.-M.; Magnier, E. *Beilstein J. Org. Chem.* **2020**, *16*, 2948-2953

### b. SF<sub>6</sub> at multiple scan rate

Scan range: -2.0 V to 0.0 V

Scan rates (in chronological order):

1) 50 mV/s 2) 100 mV/s 3) 25 mV/s 4) 75 mV/s 5) 200 mV/s

Electrolyte: TBAClO<sub>4</sub> (0.15M) / Solvent: THF (12 mL)

Working electrode: 1.5 mm diameter Sn wire (0.6 cm submerged)

Counter electrode: 2.0 mm diameter Zn wire (1.5 cm submerged)

Reference electrode: Ag/AgCl

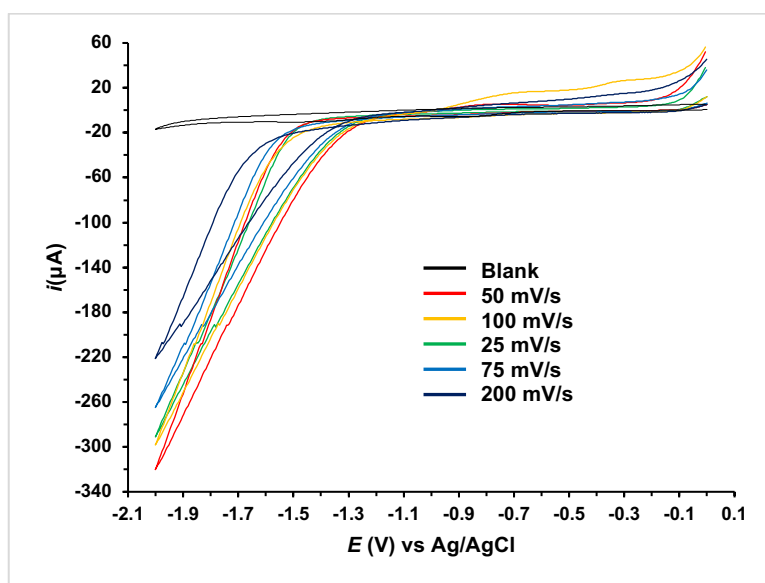

**Figure S7.** Reduction of SF<sub>6</sub> with Zn as sacrificial anode at multiple scan rates.

The voltammogram shows the decrease of cathodic current in the chronological order of the scans. It suggests the increased internal resistance from either a) electrode passivation or b) accumulation of salt formed from solvated Zn cation.

Scan range: -2.0 V to 0.0 V

Scan rates (in chronological order):

1) 50 mV/s 2) 100 mV/s 3) 25 mV/s 4) 75 mV/s 5) 200 mV/s

Electrolyte: TBAClO<sub>4</sub> (0.15M) / Solvent: THF (12 mL)

Working electrode: 1.5 mm diameter Sn wire (0.6 cm submerged)

Counter electrode: Pt plate (0.8 cm<sup>2</sup>)

Reference electrode: Ag/AgCl

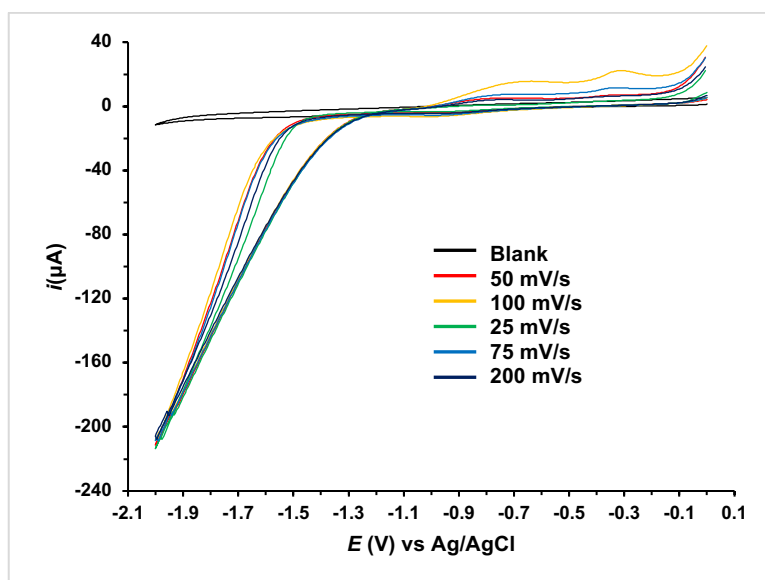

**Figure S8.** Reduction of SF<sub>6</sub> with Pt as anode at multiple scan rates.

Pt anode is resistant to galvanic corrosion and does not dissociate Pt cation under electric current. As expected with Pt as anode, the voltammogram shows consistent current throughout the entire CV experiment. This result supports that the decrease of cathodic current in previous CV experiment is caused by Zn sacrificial anode.

### c. SF<sub>6</sub> + NEt<sub>3</sub> at multiple scan rate

Scan range: -2.0 V to 0.0 V

Scan rates (in chronological order):

1) 50 mV/s 2) 100 mV/s 3) 25 mV/s 4) 75 mV/s 5) 200 mV/s

Electrolyte: TBAClO<sub>4</sub> (0.15M) / Solvent: THF (12 mL)

Working electrode: 1.5 mm diameter Sn wire (0.6 cm submerged)

Counter electrode: 2.0 mm diameter Zn wire (1.5 cm submerged)

Reference electrode: Ag/AgCl

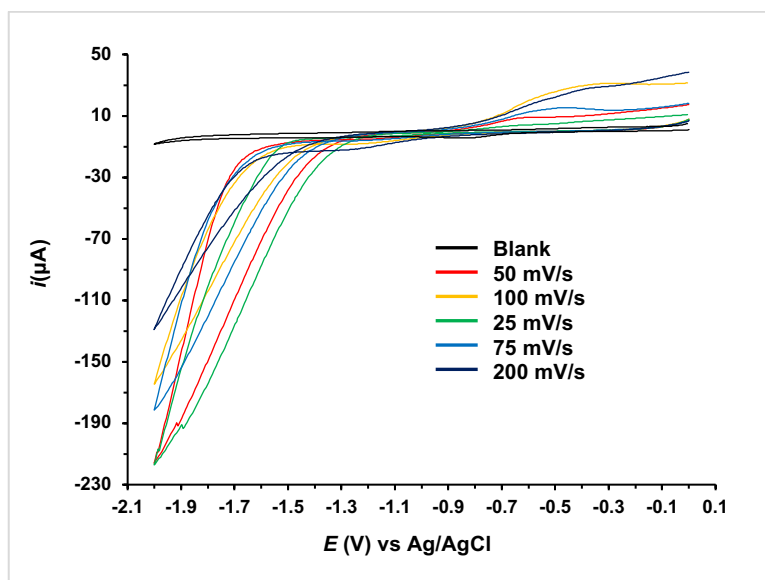

**Figure S9.** Reduction of SF<sub>6</sub> in the presence of NEt<sub>3</sub> with Zn as sacrificial anode at multiple scan rates. [NEt<sub>3</sub>] = 99 mM

In the presence of triethylamine, the cathodic current is now dependent on the scan rate. Slower scan rate allows more diffusion time for amine base to either scavenge the reduced SF<sub>6</sub> material or promote the solvation of Zn cation. This maintains the internal resistance fairly stable, which enhances the cathodic current compared to faster scan rate.



Scan range: -2.0 V to 0.0 V

Scan rates (in chronological order):

1) 50 mV/s 2) 100 mV/s 3) 25 mV/s 4) 75 mV/s 5) 200 mV/s

Electrolyte: TBAClO<sub>4</sub> (0.15M) / Solvent: THF (12 mL)

Working electrode: 1.5 mm diameter Sn wire (0.6 cm submerged)

Counter electrode: Pt plate (0.8 cm<sup>2</sup>)

Reference electrode: Ag/AgCl

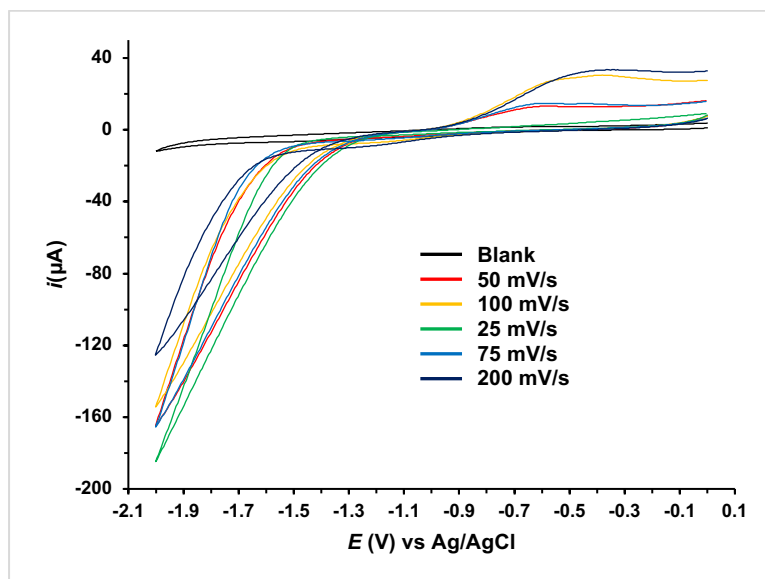

**Figure S10.** Reduction of SF<sub>6</sub> in the presence of NEt<sub>3</sub> with Pt as anode at multiple scan rates. [NEt<sub>3</sub>] = 99 mM

With Pt as anode, the voltammogram still shows enhanced cathodic current under slower scan rate. The result supports that the amine base scavenges reduced SF<sub>6</sub> material (S<sub>n</sub>F<sub>m</sub> or F<sup>-</sup>), which can maintain the internal resistance stable.

#### d. SF<sub>6</sub> + glycoside at multiple scan rate

Glycoside: 2,3,4,6-tetrakis-*O*-(phenylmethyl)-*D*-glucopyranoside (**1b**)

Scan range: -2.0 V to 0.0 V

Scan rates (in chronological order):

1) 50 mV/s 2) 100 mV/s 3) 25 mV/s 4) 75 mV/s 5) 200 mV/s

Electrolyte: TBAClO<sub>4</sub> (0.15M) / Solvent: THF (12 mL)

Working electrode: 1.5 mm diameter Sn wire (0.6 cm submerged)

Counter electrode: 2.0 mm diameter Zn wire (1.5 cm submerged)

Reference electrode: Ag/AgCl

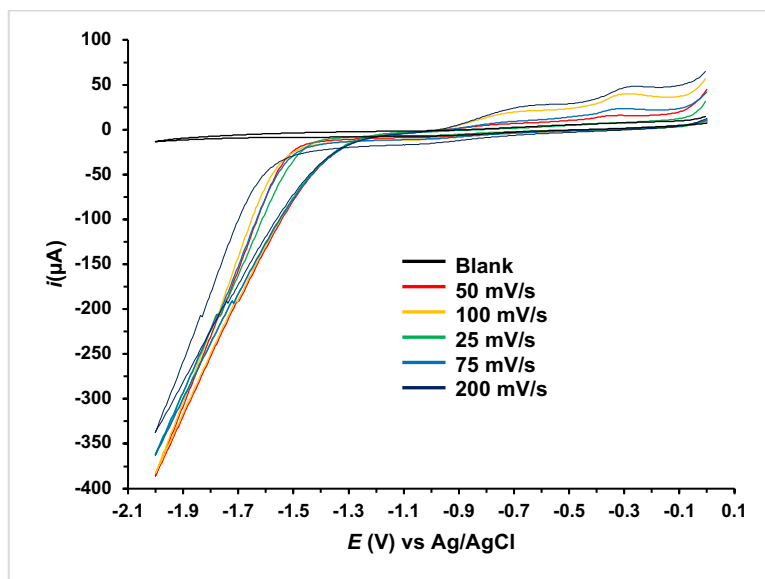

**Figure S11.** Reduction of SF<sub>6</sub> in the presence of glycoside substrate with Zn as sacrificial anode. [1b] = 33 mM.

In the presence of SF<sub>6</sub> and glycoside substrate, the voltammogram is consistently showing the decrease of cathodic current in chronological order of the scanning. This result suggests that deoxofluorination of glycoside is a chemical reaction process which is not catalyzed by electrolysis.

**e. SF<sub>6</sub> + glycoside +NEt<sub>3</sub> at multiple scan rate**

Glycoside: 2,3,4,6-tetrakis-*O*-(phenylmethyl)-*D*-glucopyranoside (**1b**)

Scan range: -2.0 V to 0.0 V

Scan rates (in chronological order):

1) 50 mV/s 2) 100 mV/s 3) 25 mV/s 4) 75 mV/s 5) 200 mV/s

Electrolyte: TBAClO<sub>4</sub> (0.15M) / Solvent: THF (12 mL)

Working electrode: 1.5 mm diameter Sn wire (0.6 cm submerged)

Counter electrode: 2.0 mm diameter Zn wire (1.5 cm submerged)

Reference electrode: Ag/AgCl

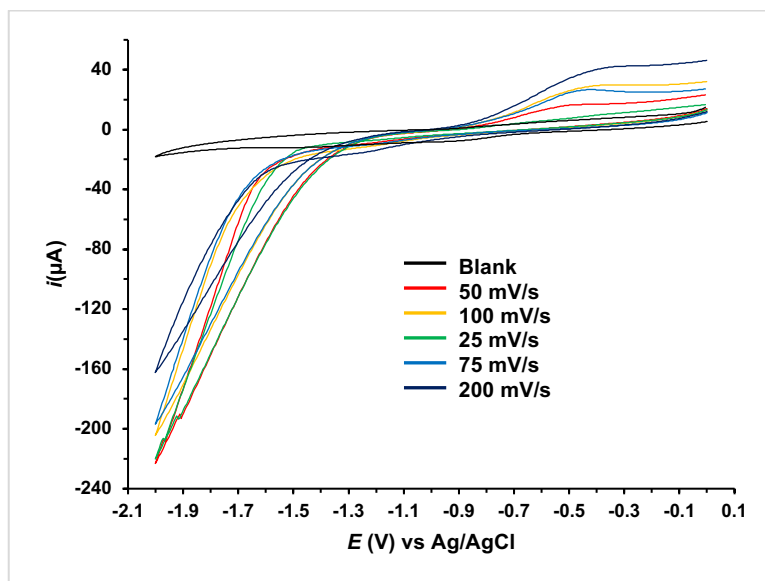

**Figure S12.** Reduction of SF<sub>6</sub> under standard reaction condition. [**1b**] = 33 mM, [NEt<sub>3</sub>] = 99 mM

The CV experiment under standard reaction condition shows the enhancement of cathodic current under slower scan rate again because the amine base is present in the solution.

## V. Additional Experiments

### a. Electric Current On/Off Experiment

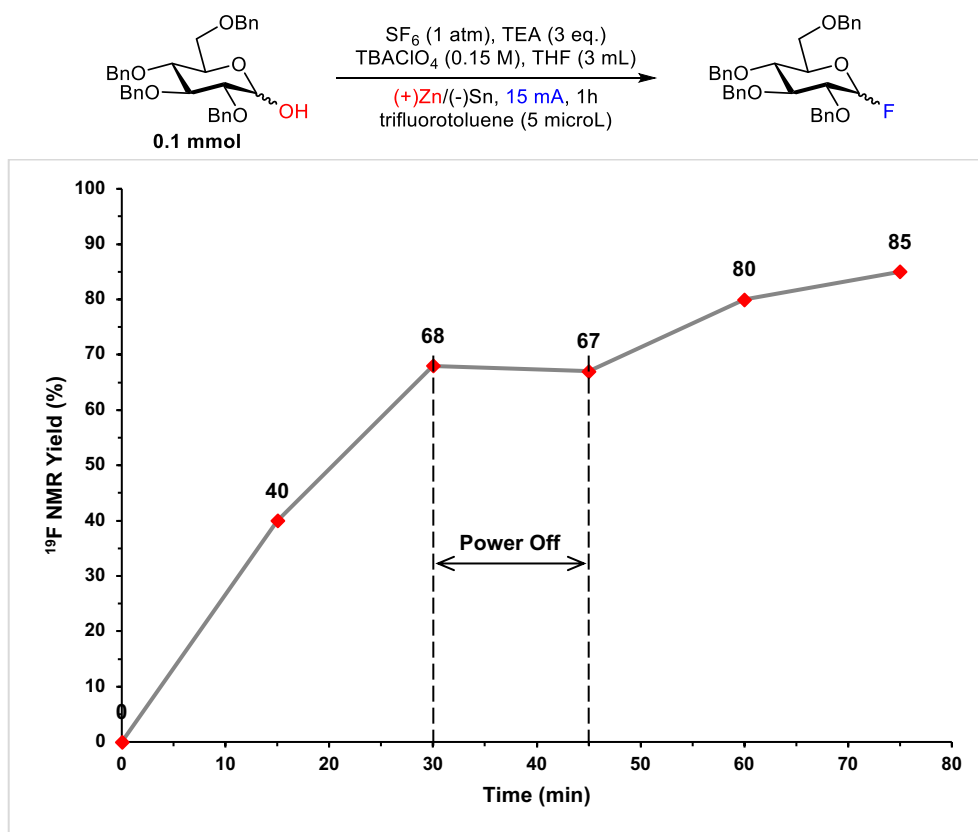

Figure S13. Electric current On/Off experiment

An oven-dried 1 dram vial was charged with 2,3,4,6-tetrakis-*O*-(phenylmethyl)-*D*-glucopyranoside **1a** (0.1 mmol, 1 equiv.) and tetrabutylammonium perchlorate (0.45 mmol, 0.15 M). The vial containing the mixture was sealed with PTFE/Silicone septum cap and was further dried under high vacuum for 5 minutes. Into the sealed vial, THF (3 mL), triethylamine (0.3 mmol, 3 equiv.), and  $\alpha,\alpha,\alpha$ -trifluorotoluene (5 microL) were added, and the vial was stirred until the mixture became homogeneous. The mixture was sparged with a balloon containing SF<sub>6</sub> gas for 30 seconds. After the sparging was done, the valve of the balloon was adjusted to sparge small bubbles and left open until the reaction was stopped. Cathode and anode were connected to DC power supply and the reaction was stirred at high rpm. The reaction progress was monitored by taking an aliquot of sample (0.2 mL) every 15 minutes.

30 minutes after the start of reaction, the electric current was shut off and then a sample was taken out. 15 minutes after, another aliquot of sample was taken out, and then the electric current was applied again.

The result is showing that the reaction proceeds only when the electric current is applied, which means that the active fluorinating agent formed *in situ* is consumed right away and does not accumulate.

## b. Control Experiment with ZnF<sub>2</sub>

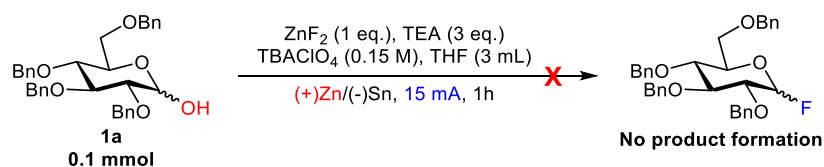

An oven-dried 1 dram vial was charged with 2,3,4,6-tetrakis-*O*-(phenylmethyl)-D-glucopyranoside **1a** (0.1 mmol, 1 equiv.), zinc(II) fluoride (0.1 mmol, 1 equiv.), and tetrabutylammonium perchlorate (0.45 mmol, 0.15 M). The vial containing the mixture was sealed with PTFE/Silicone septum cap and was further dried under high vacuum for 5 minutes. Into the sealed vial, THF (3 mL) and triethylamine (0.3 mmol, 3 equiv.) were added. The mixture was stirred until everything, except ZnF<sub>2</sub>, became homogeneous. Sn cathode and Zn anode were connected to DC power supply and the reaction was stirred at high rpm for 1 hour. The color of the reaction turned from clear to black, and the electric current dropped from 15 mA to 3 mA after the voltage reached the limit of DC power supply (31 V). <sup>1</sup>H and <sup>19</sup>F NMR of crude and worked-up reaction did not show any formation of fluorinated product.

## c. PPh<sub>3</sub> Quenching Experiment

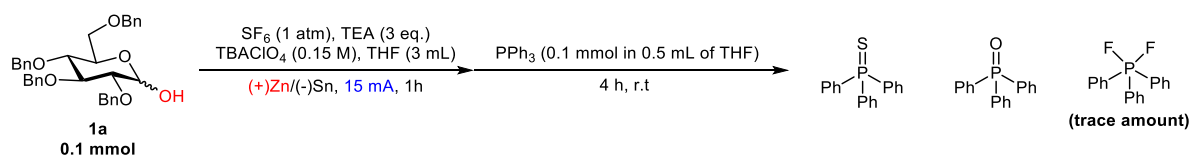

2,3,4,6-tetrakis-*O*-(phenylmethyl)-D-glucopyranoside **1a** was subjected to a standard reaction. After the electric current was shut off, an aliquot of crude reaction was taken out, and then PPh<sub>3</sub> solution (0.1 mmol in 0.5 mL of THF) was injected into the reaction vial. The mixture was then stirred for 4 hours, and then the samples were taken out. All samples were subjected to <sup>19</sup>F and <sup>31</sup>P NMR experiments and were compared with each other and with the NMR spectra from our photocatalytic reaction.<sup>21</sup> Careful examination of <sup>19</sup>F and <sup>31</sup>P NMR spectrum of electrocatalytic reaction showed the formation of S=PPh<sub>3</sub> and O=PPh<sub>3</sub> just like photocatalytic reaction. However, F<sub>2</sub>PPh<sub>3</sub> is formed in trace amount unlike photocatalytic reaction, which suggests that elemental fluorine or fluoride anion is scavenged by triethylamine or zinc cations.

<sup>21</sup>Kim, S.; Khomutnyk, Y.; Bannykh, A.; Nagorny, P. *Org. Lett.* **2021**, 23, 1, 190-194

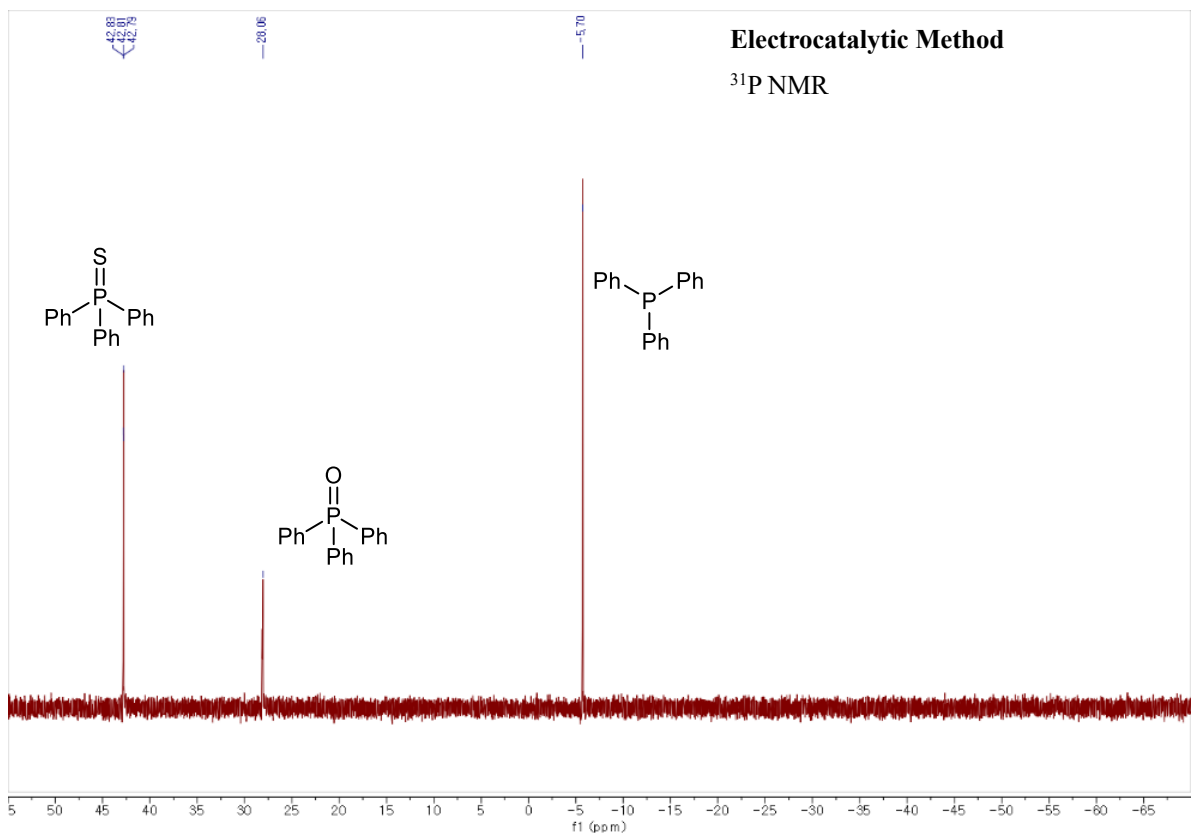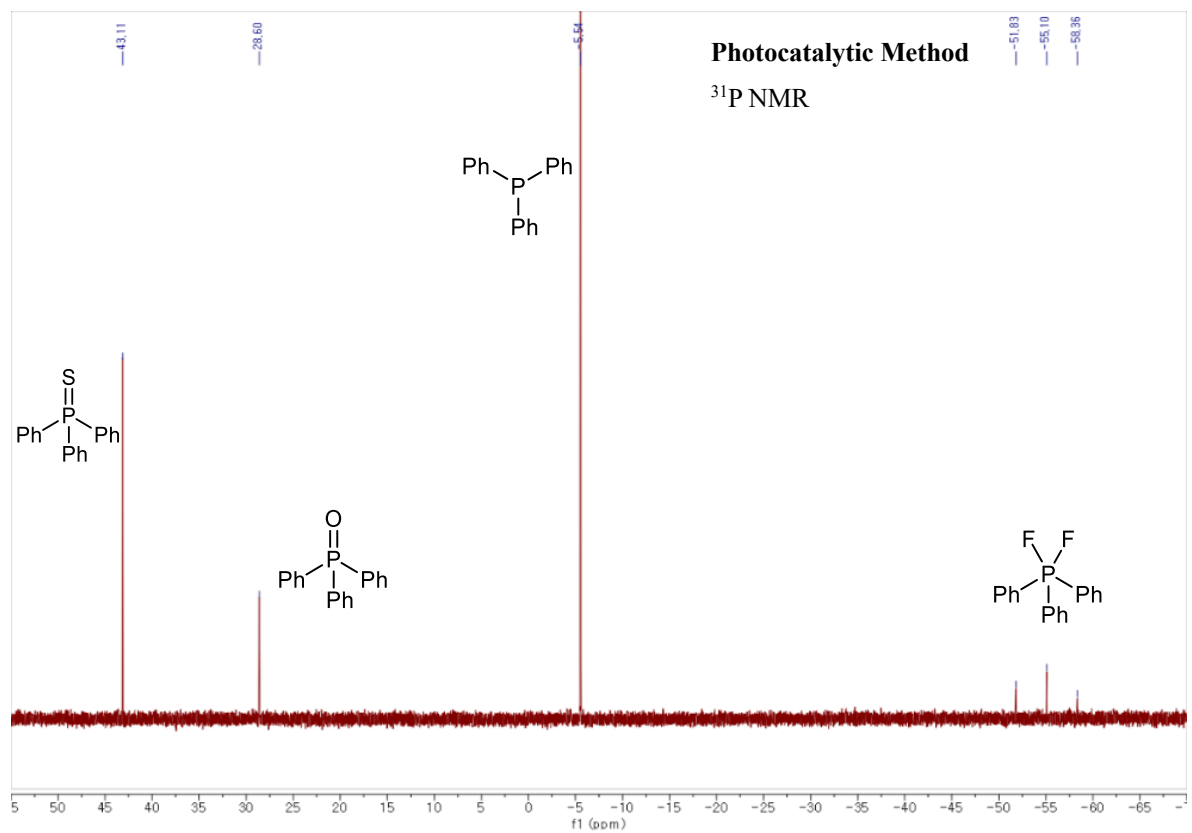

**Figure S14.** <sup>31</sup>P NMR spectra of PPh<sub>3</sub> quenching experiment.



# 2,3,4,6-Tetrakis-O-(phenylmethyl)- $\beta$ -D-galactopyranosyl fluoride (2a- $\beta$ , Major diastereomer)

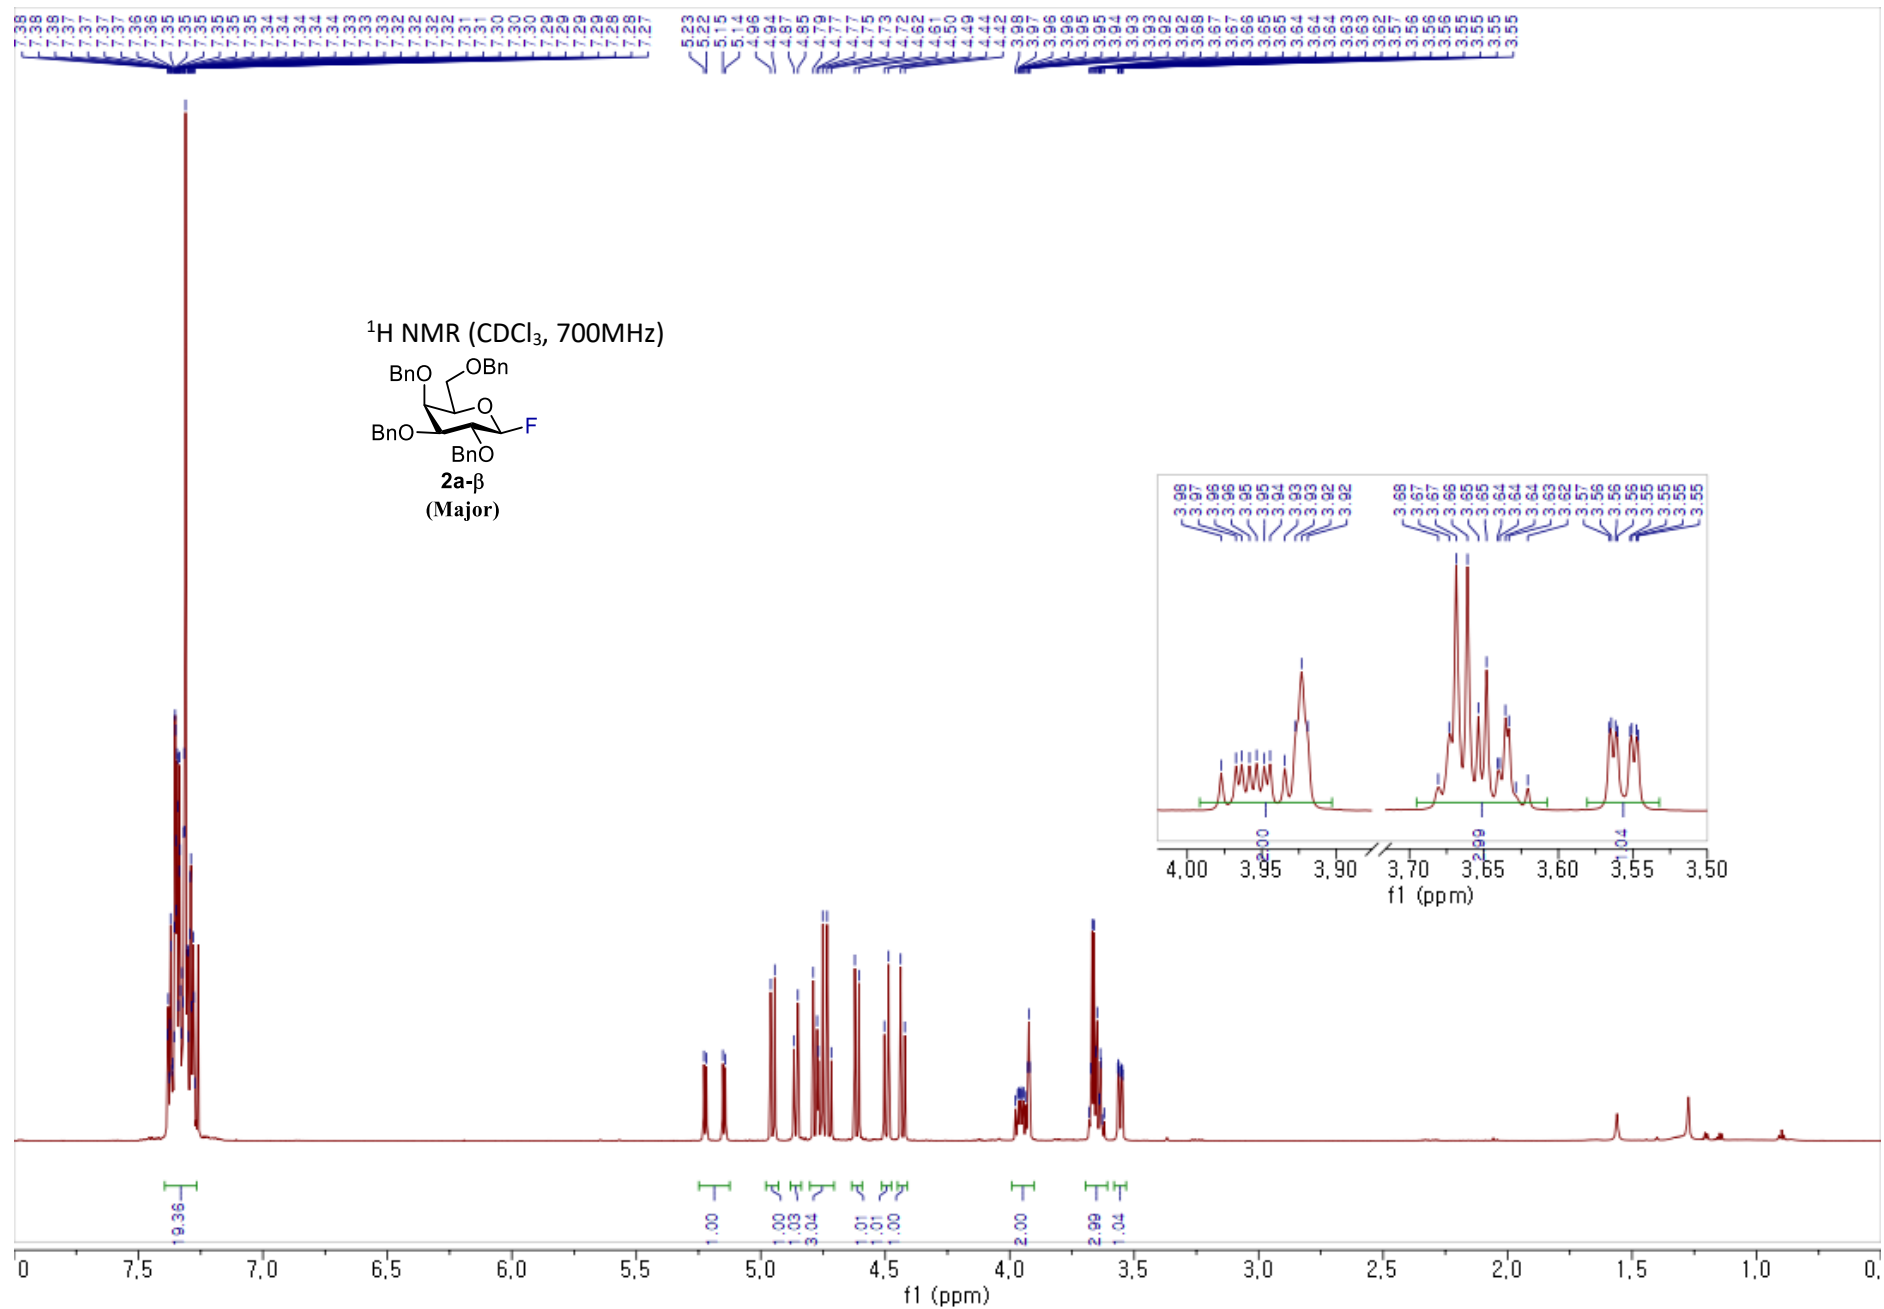





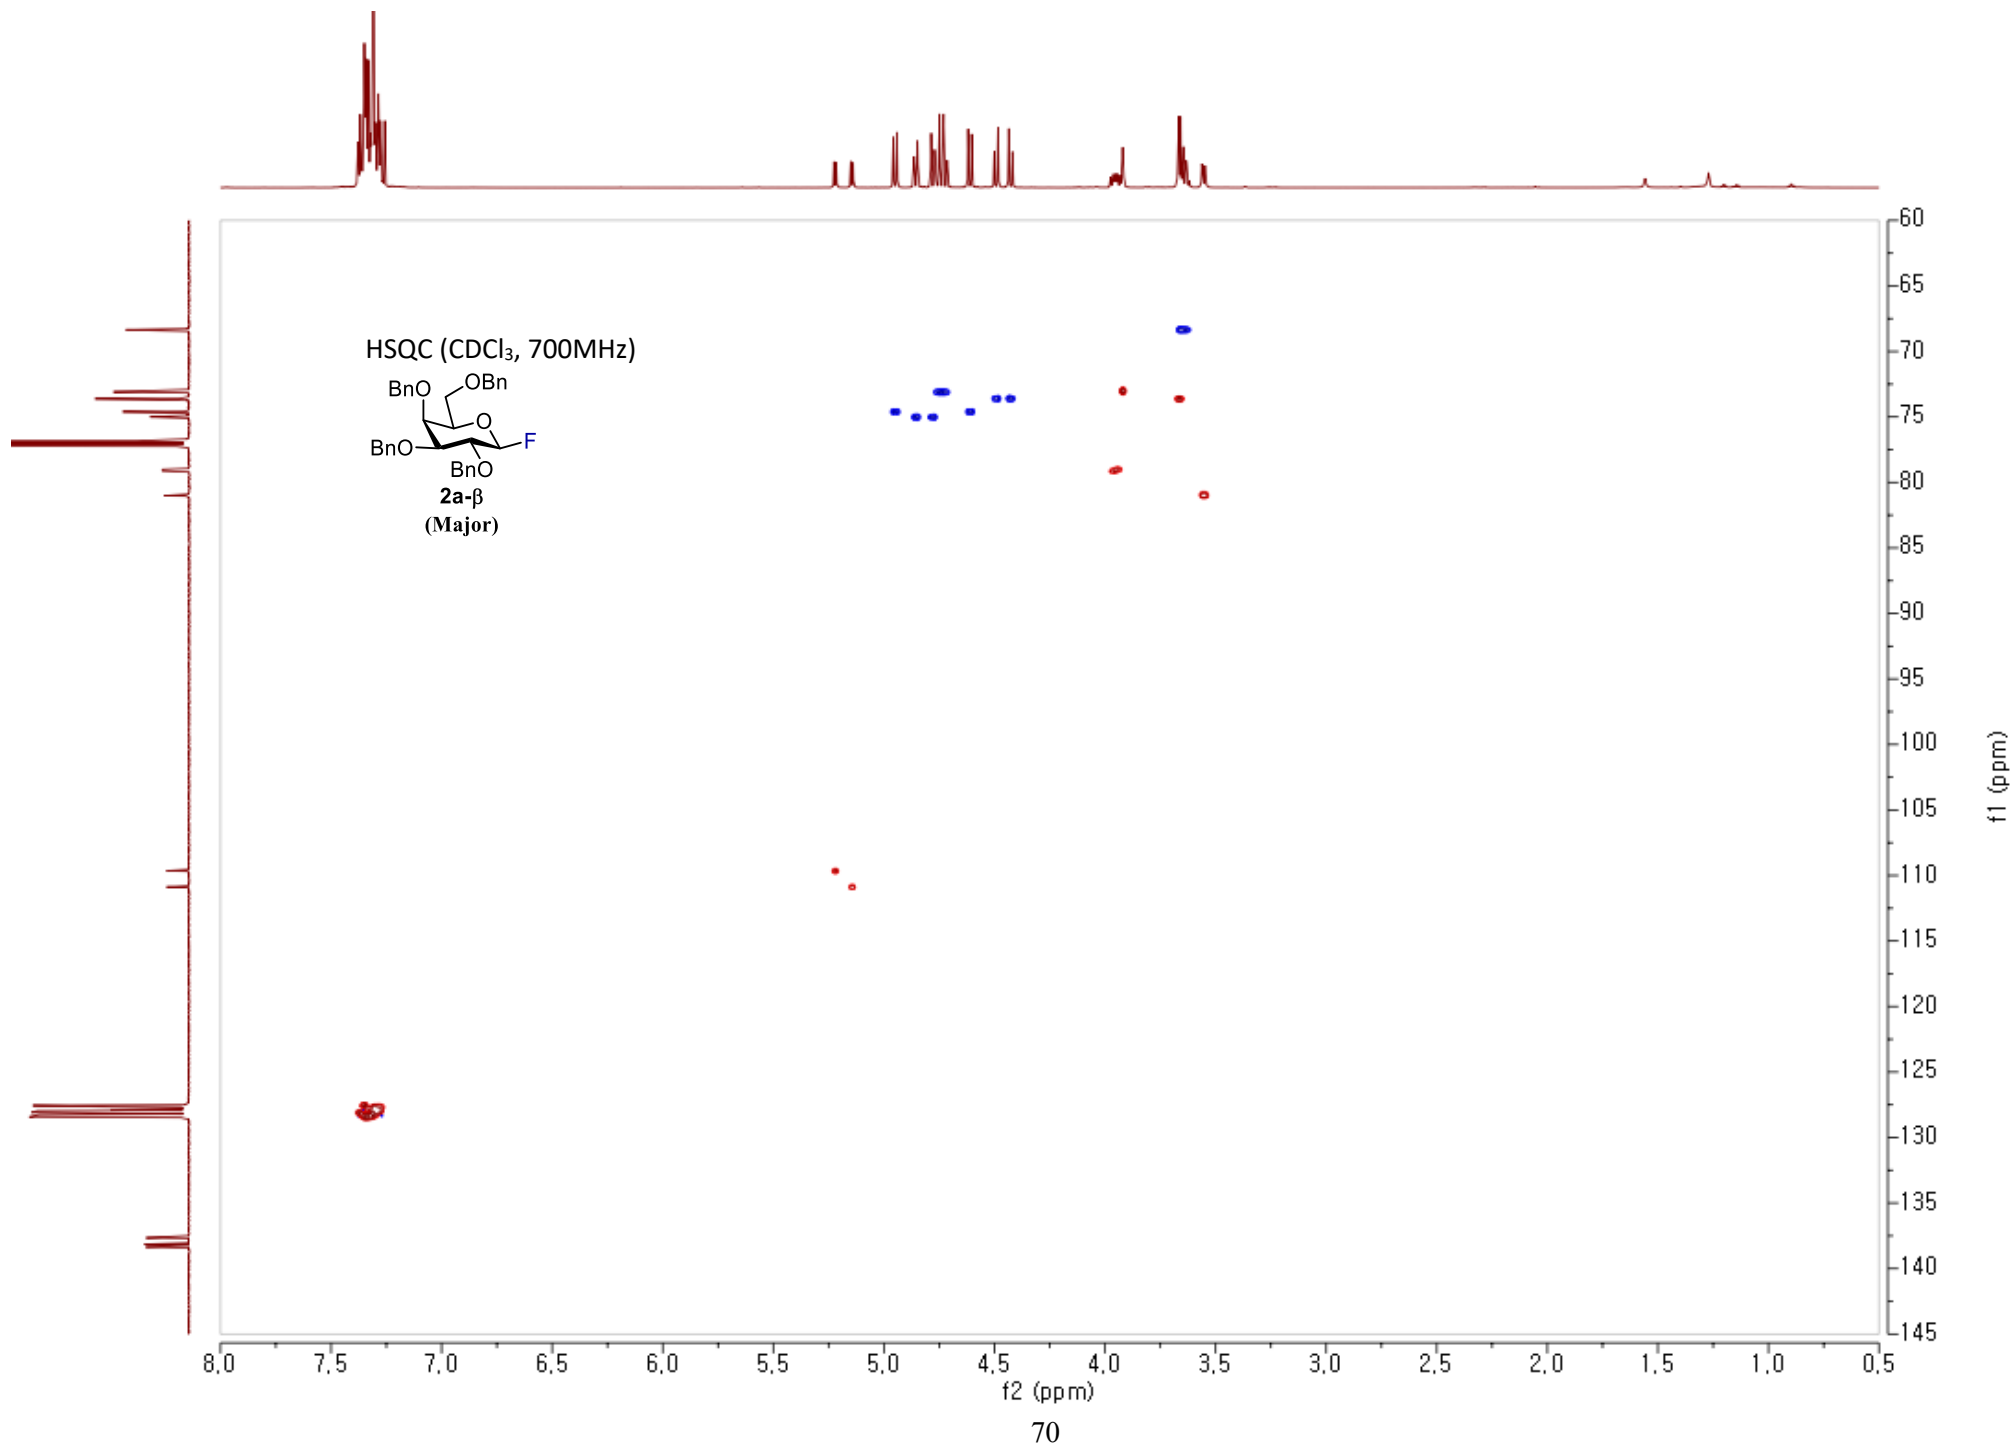

# 2,3,4,6-Tetrakis-O-(phenylmethyl)- $\alpha$ -D-galactopyranosyl fluoride (2a- $\alpha$ , Minor diastereomer)

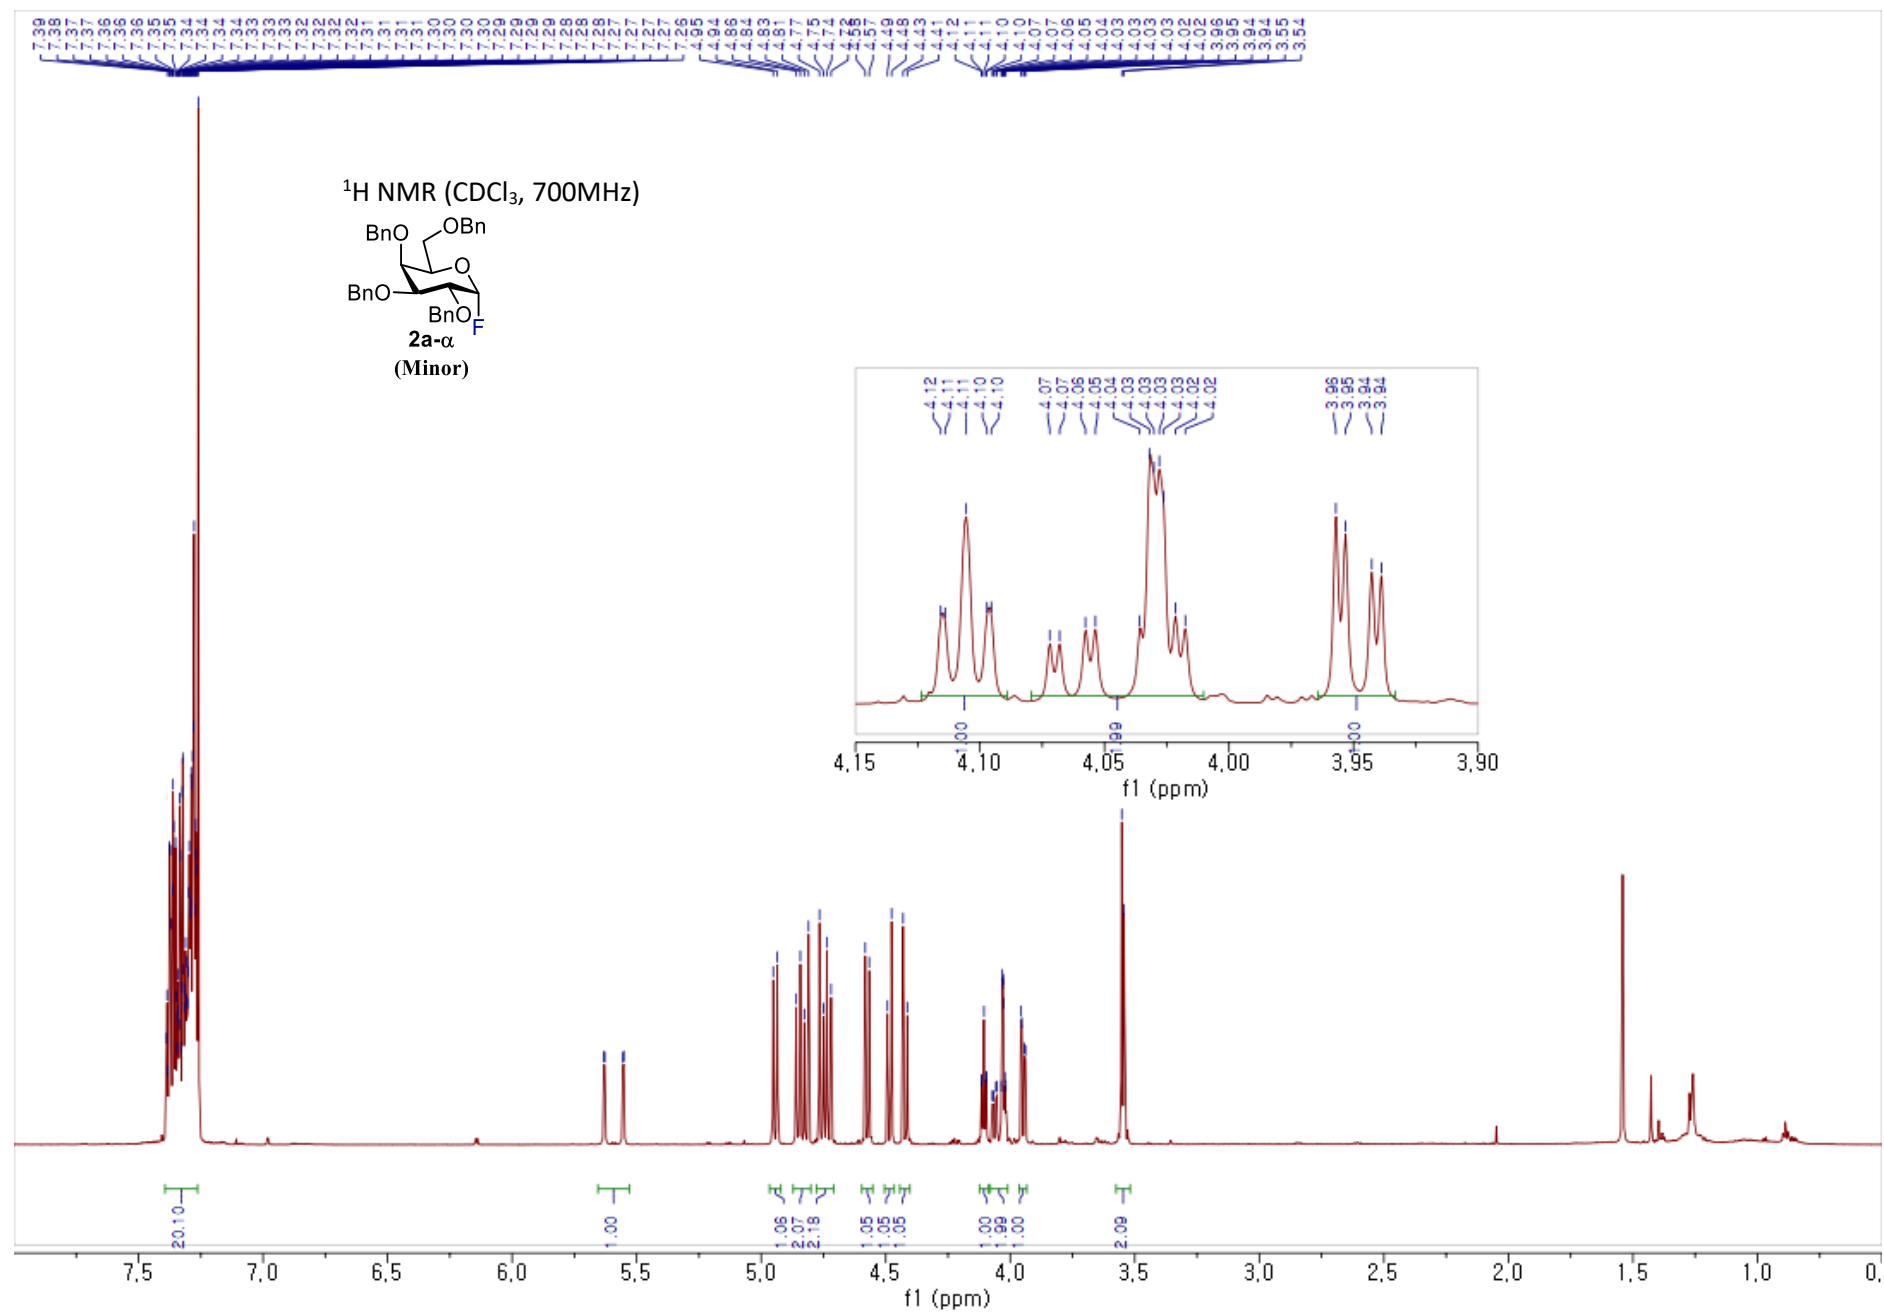

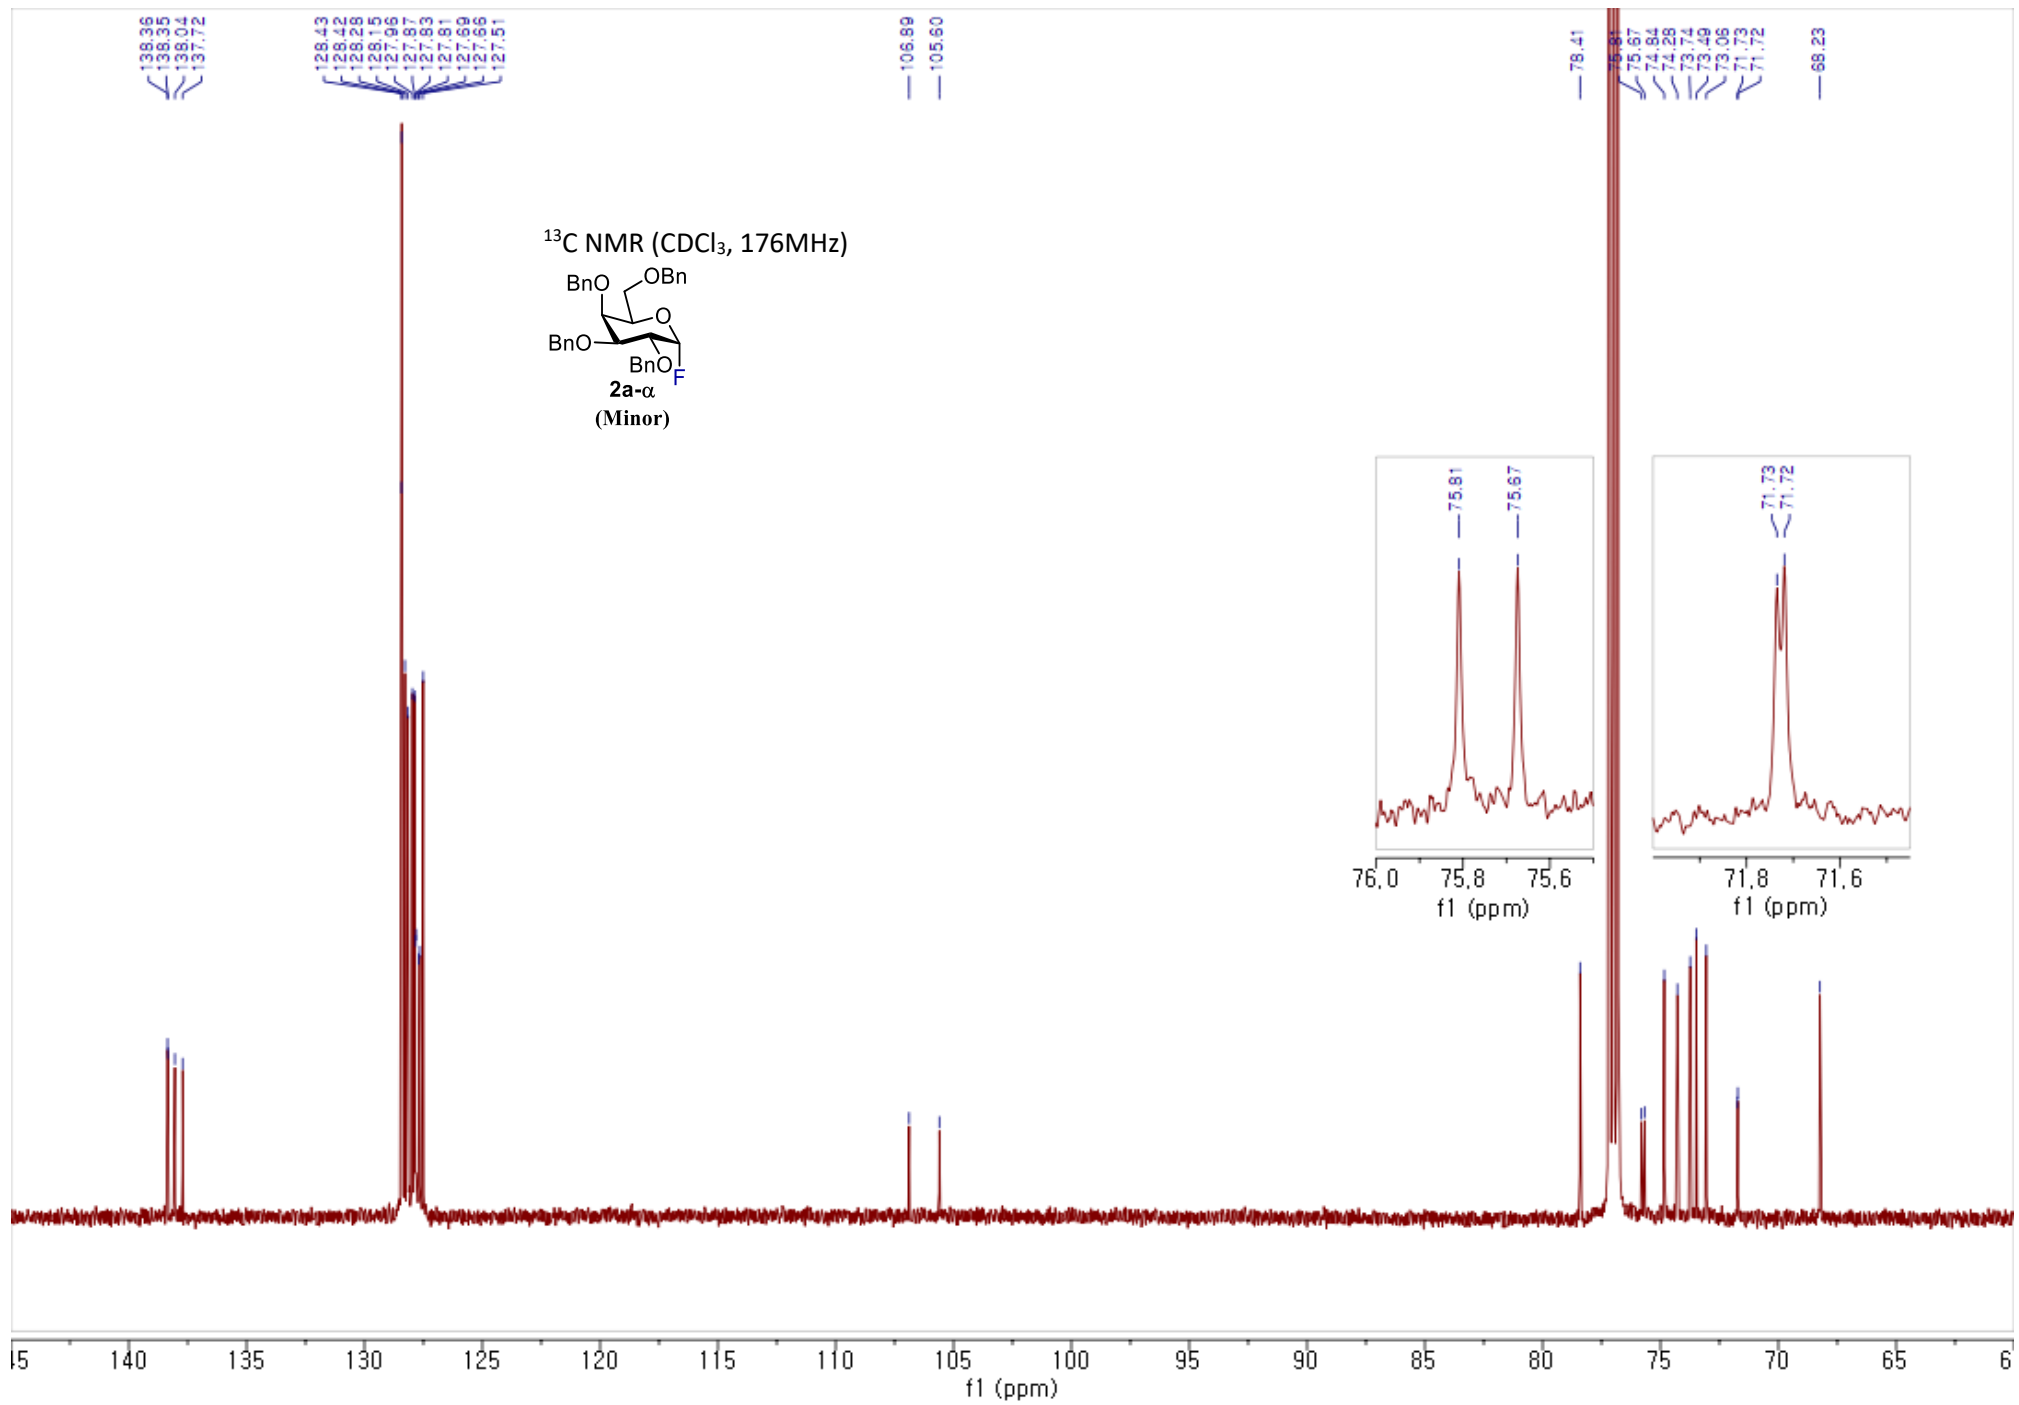

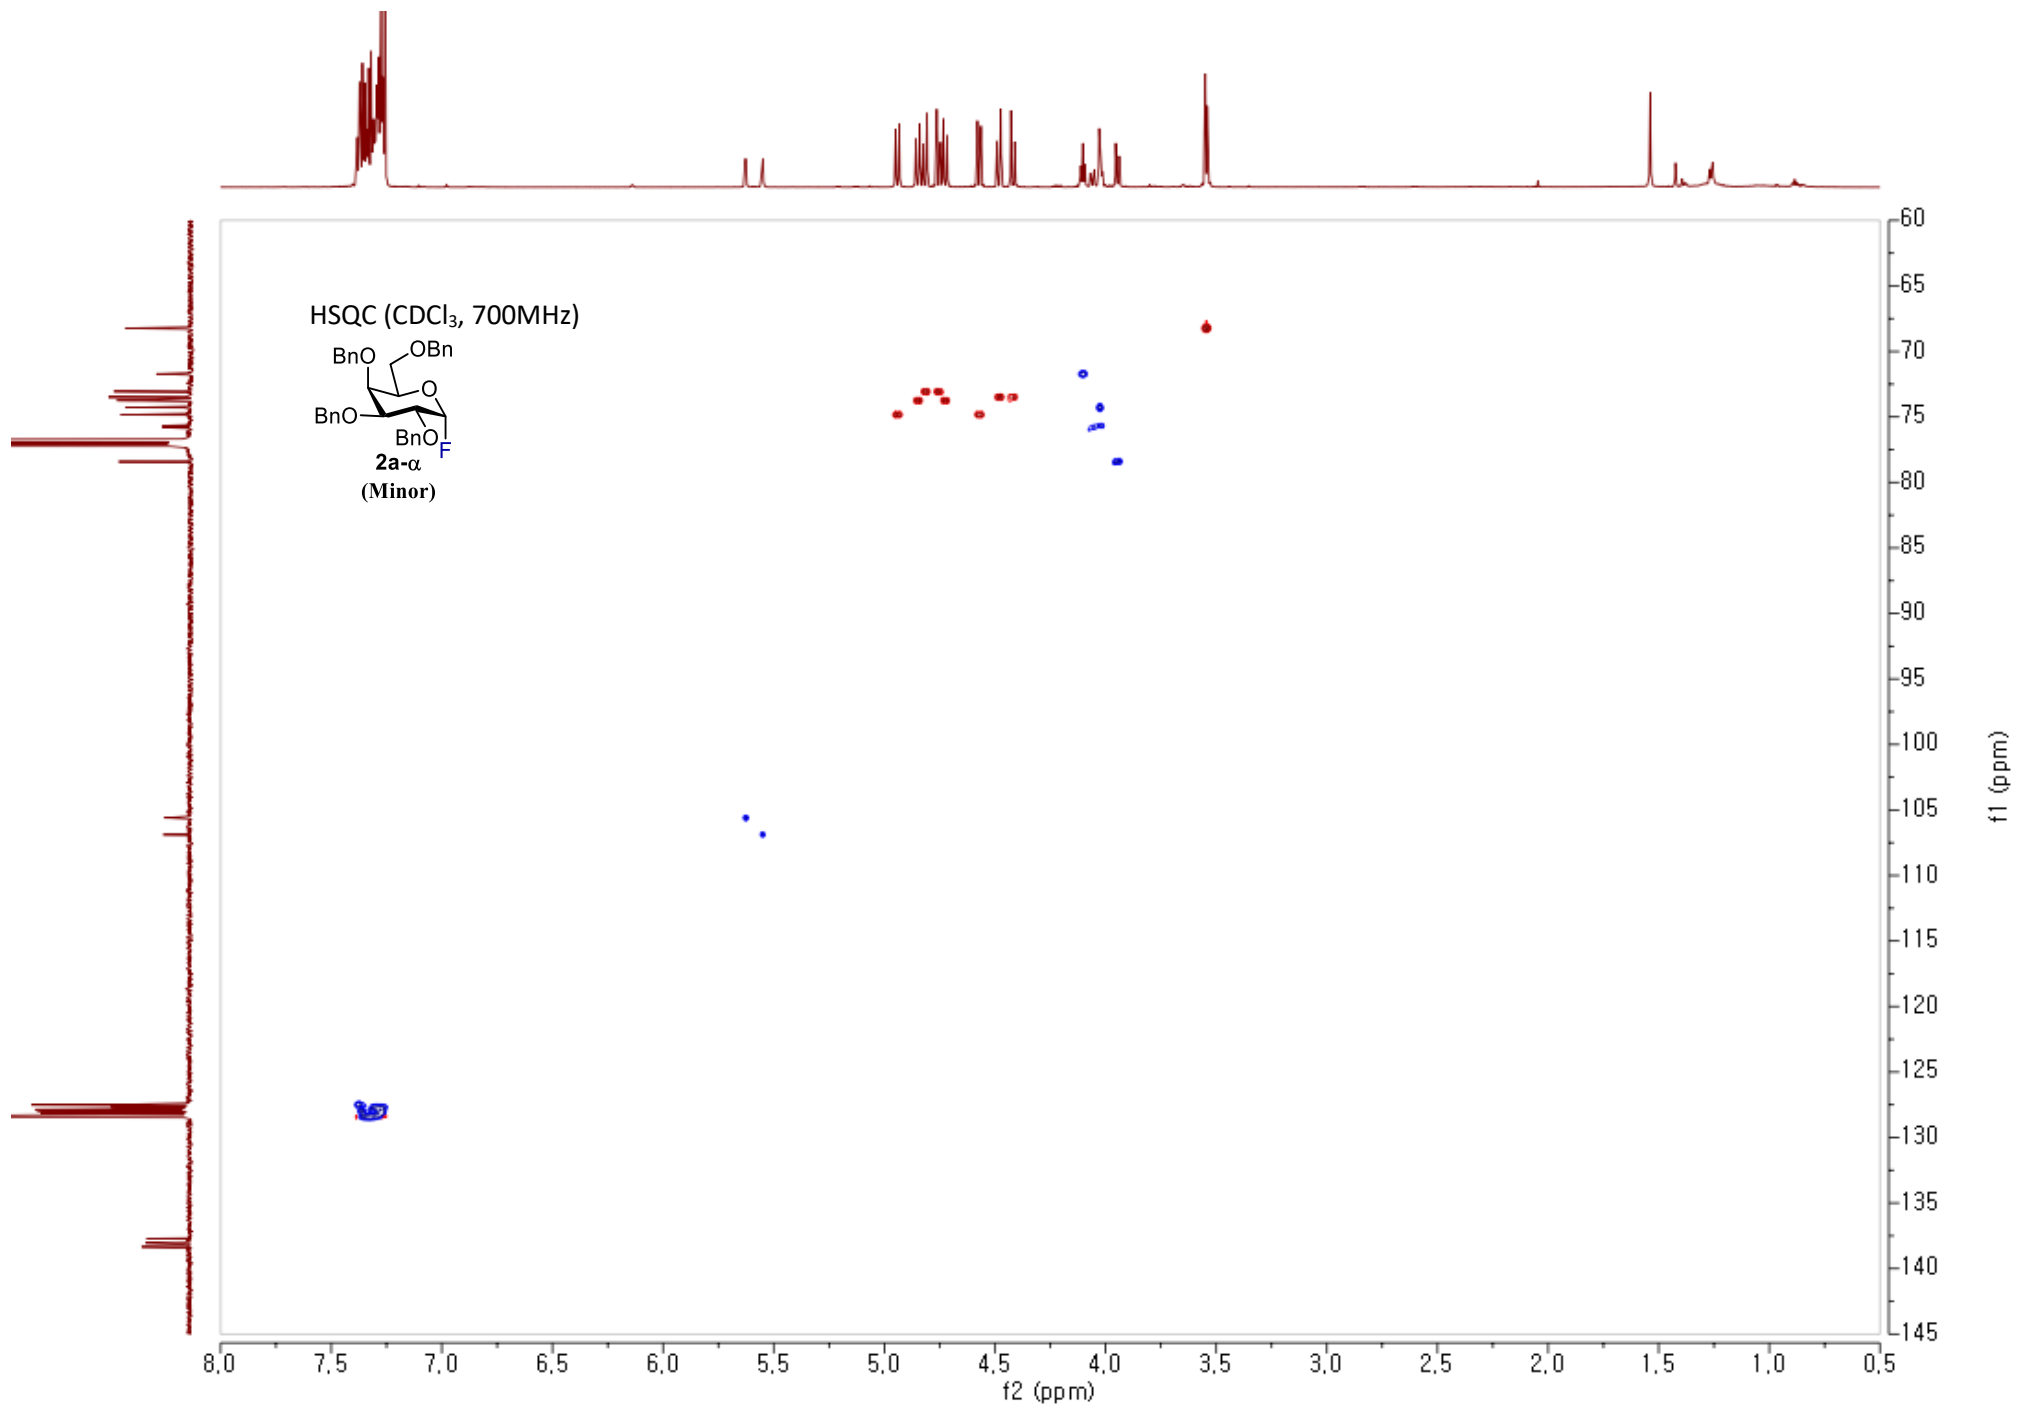

After Work-Up

$^{19}\text{F}$  NMR ( $\text{CDCl}_3$ , 564 MHz)

138.88  
138.91  
138.98  
139.00

150.10  
150.15  
150.20  
150.24

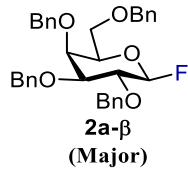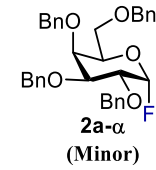

1.67

1.00

32 -133 -134 -135 -136 -137 -138 -139 -140 -141 -142 -143 -144 -145 -146 -147 -148 -149 -150 -151 -152 -153 -154 -155 -156 -1

f1 (ppm)

After Purification

$^{19}\text{F}$  NMR ( $\text{CDCl}_3$ , 564 MHz)

88.88  
88.82  
88.76  
88.70  
88.64  
150.06  
150.11  
150.16  
150.20

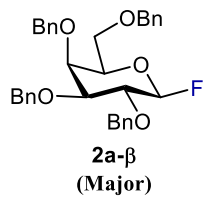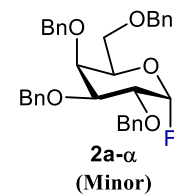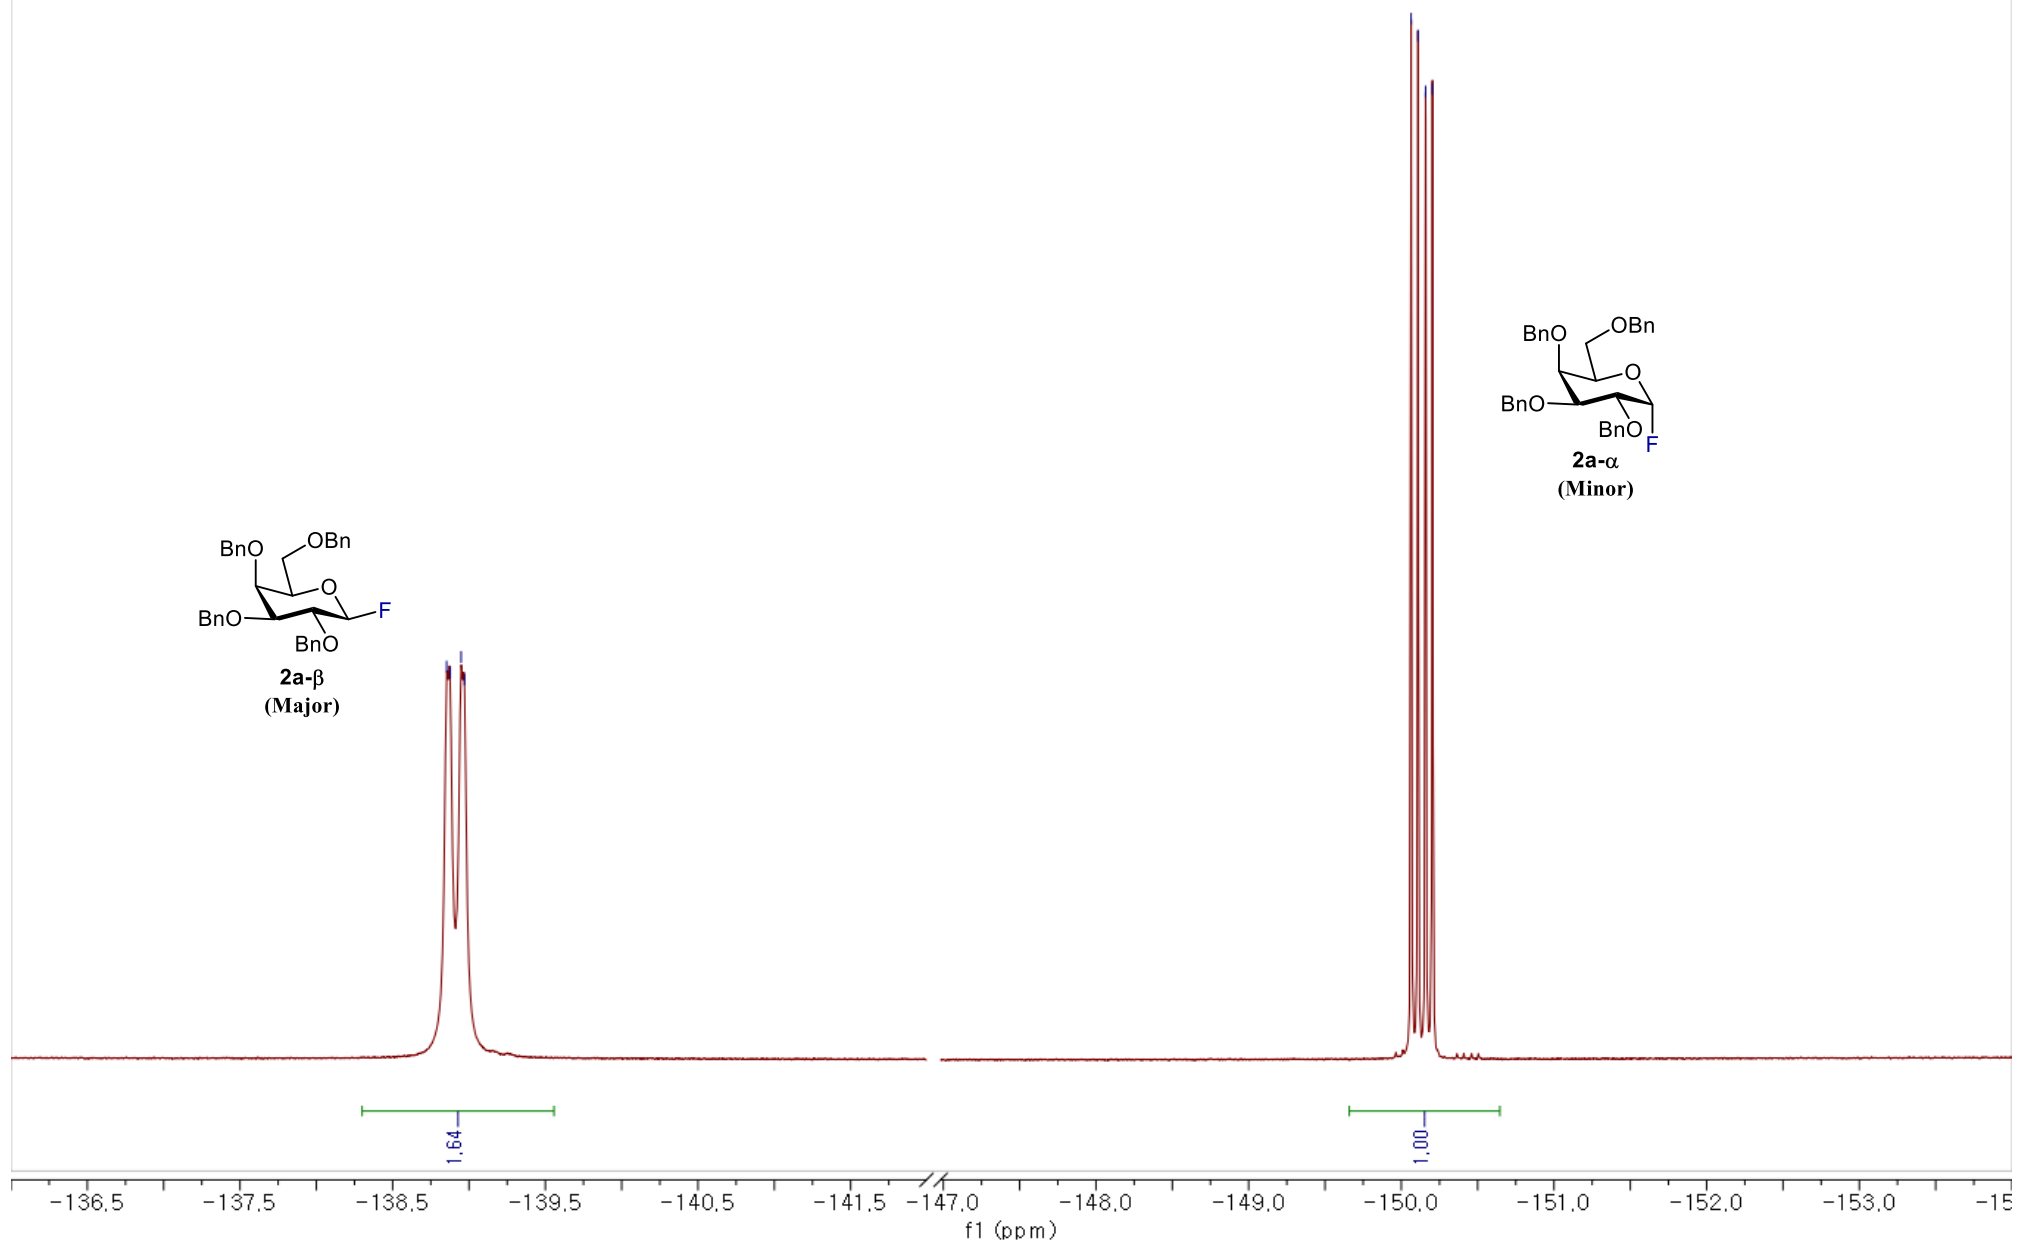

<sup>1</sup>H NMR (CDCl<sub>3</sub>, 600MHz)

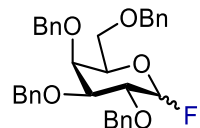

**2a**  
( $\alpha,\beta$ -mix)

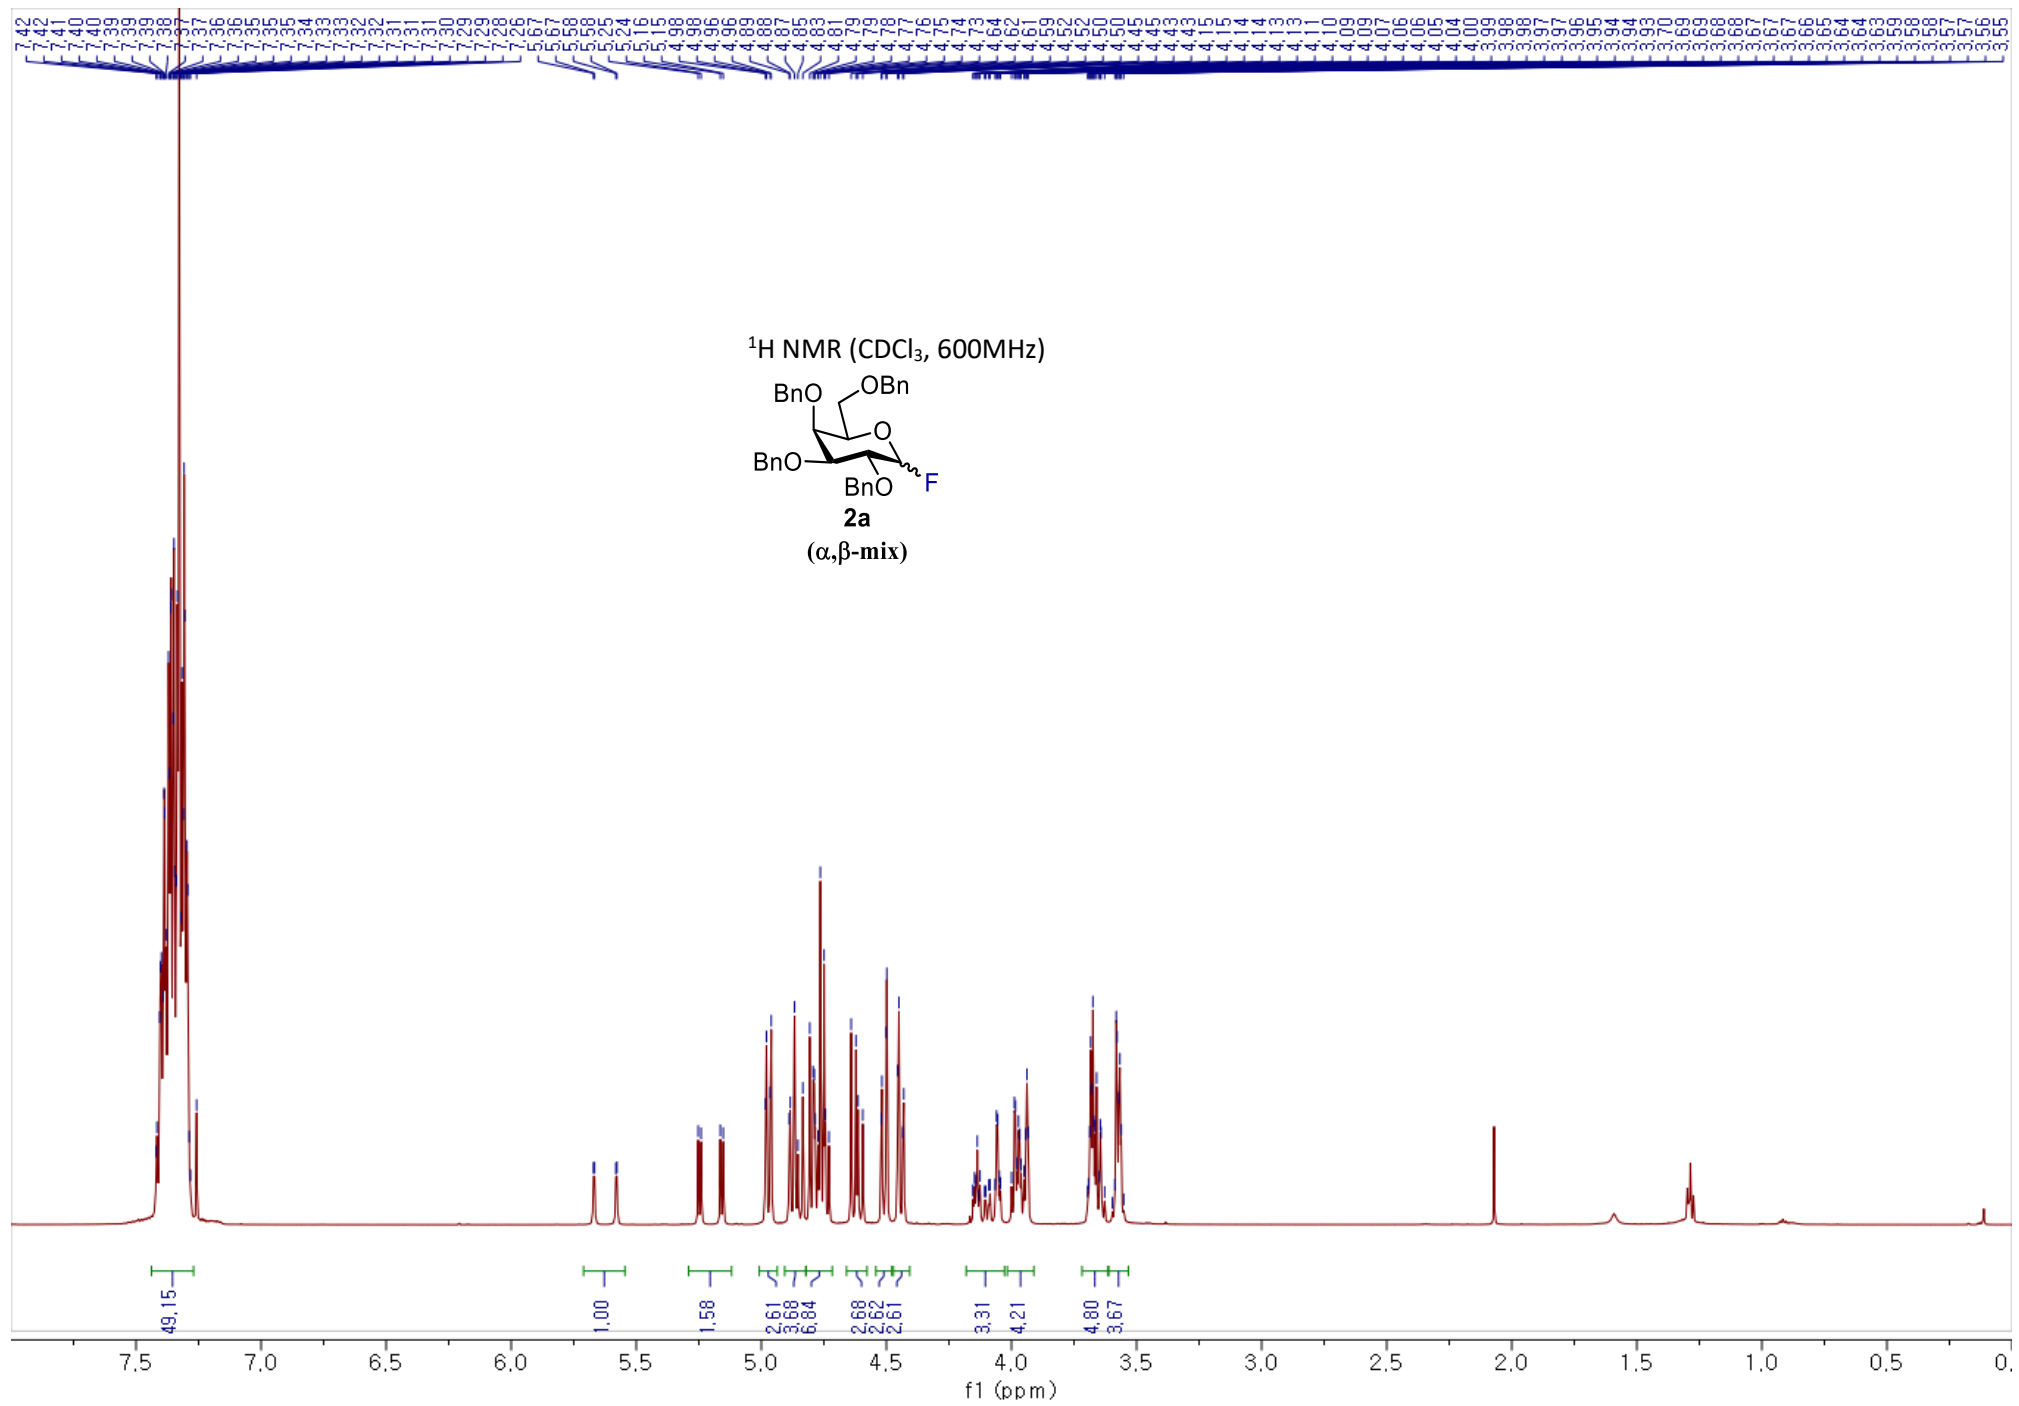



**2,3,4,6-Tetrakis-O-(phenylmethyl)-D-glucopyranosyl fluoride (2b, Isolated as  $\alpha : \beta = 1 : 1.4$ )**

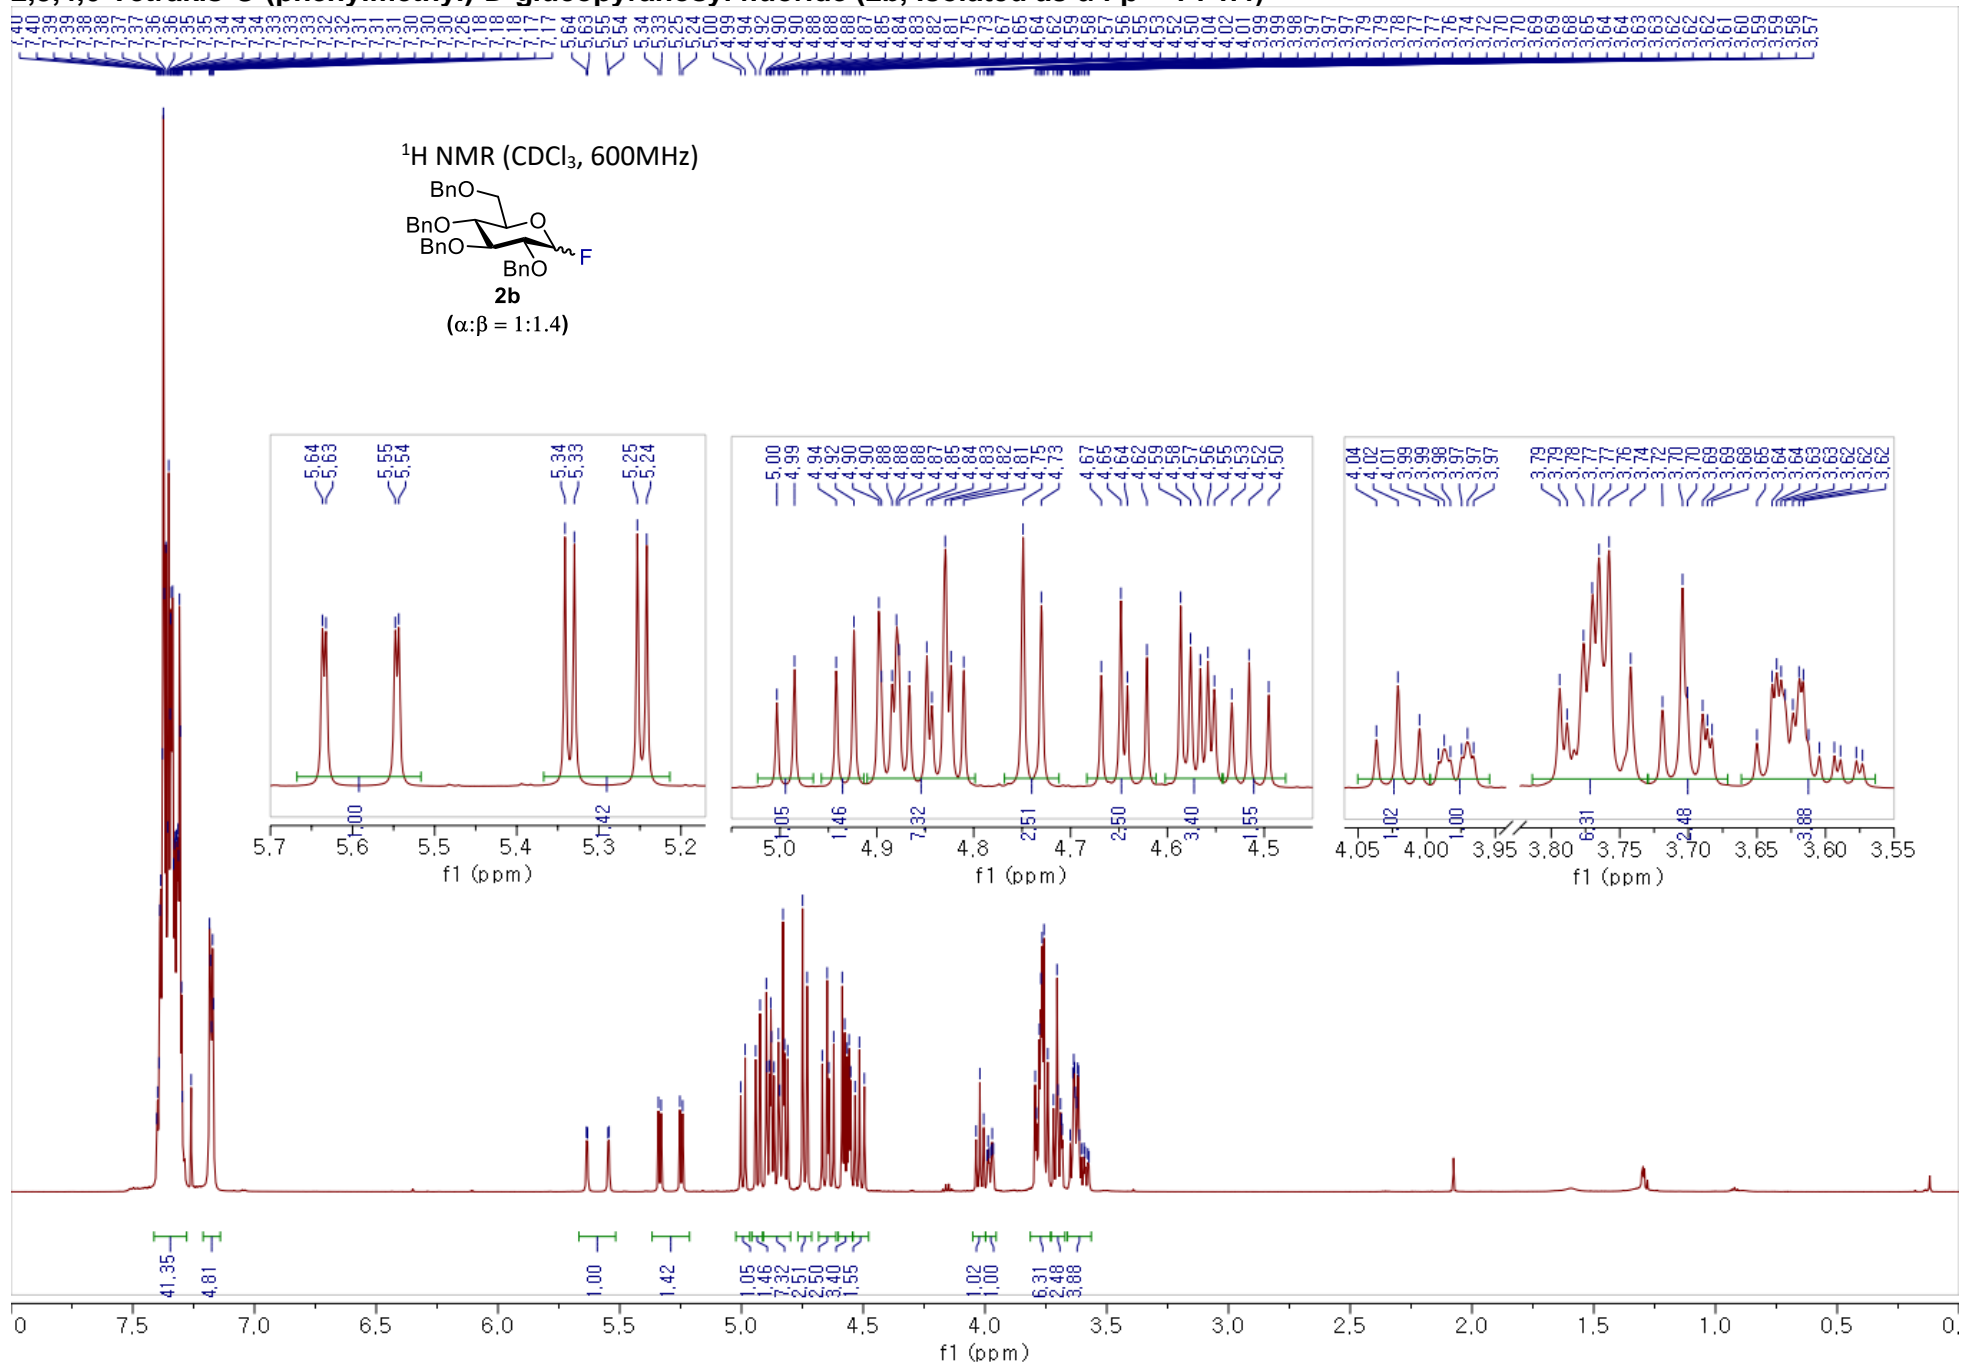

After Work-up

$^{19}\text{F}$  NMR ( $\text{CDCl}_3$ , 564 MHz)

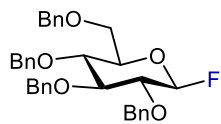

**2b- $\beta$**   
**(Major)**

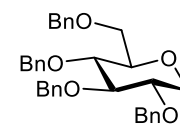

**2b- $\alpha$**   
**(Minor)**

138.07  
138.09  
138.16  
138.19

149.46  
149.51  
149.56  
149.60

1.51

1.00

30 -131 -132 -133 -134 -135 -136 -137 -138 -139 -140 -141 -142 -143 -144 -145 -146 -147 -148 -149 -150 -151 -152 -153 -154 -155 -156 -1

f1 (ppm)

After Purification  
<sup>19</sup>F NMR (CDCl<sub>3</sub>, 564 MHz)

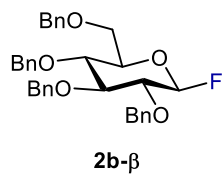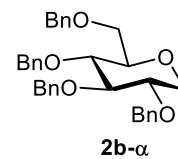

138.00  
138.02  
138.10  
138.12

149.42  
149.46  
149.51  
149.56

1.46

1.00

30 -131 -132 -133 -134 -135 -136 -137 -138 -139 -140 -141 -142 -143 -144 -145 -146 -147 -148 -149 -150 -151 -152 -153 -154 -155 -156 -1

f1 (ppm)

4,6-Tetrakis-O-(phenylmethyl)- $\alpha$ -D-Mannopyranosyl fluoride (2c- $\alpha$ , Major diastereomer)

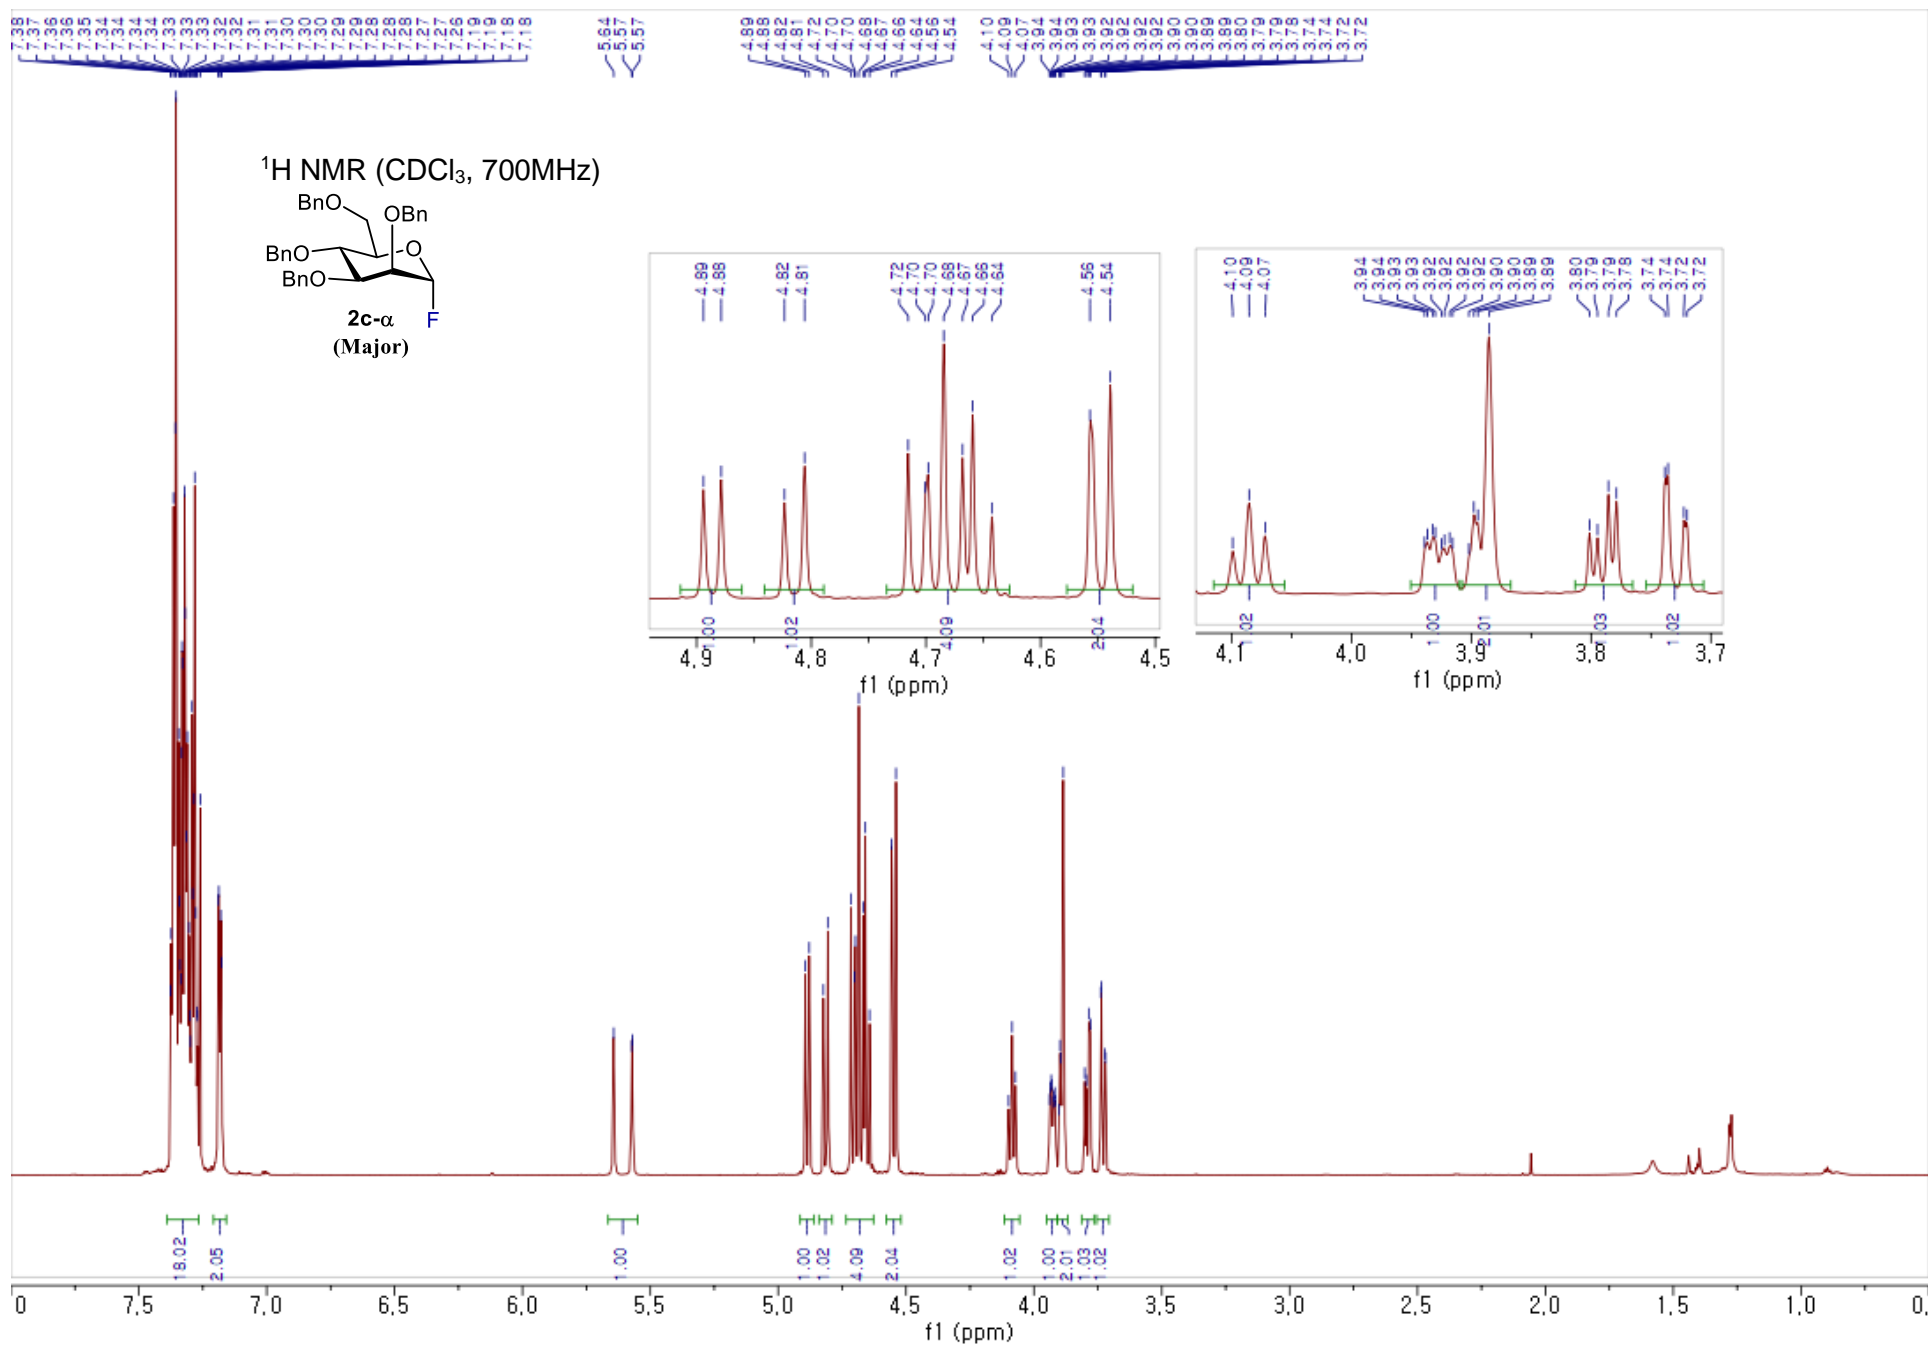

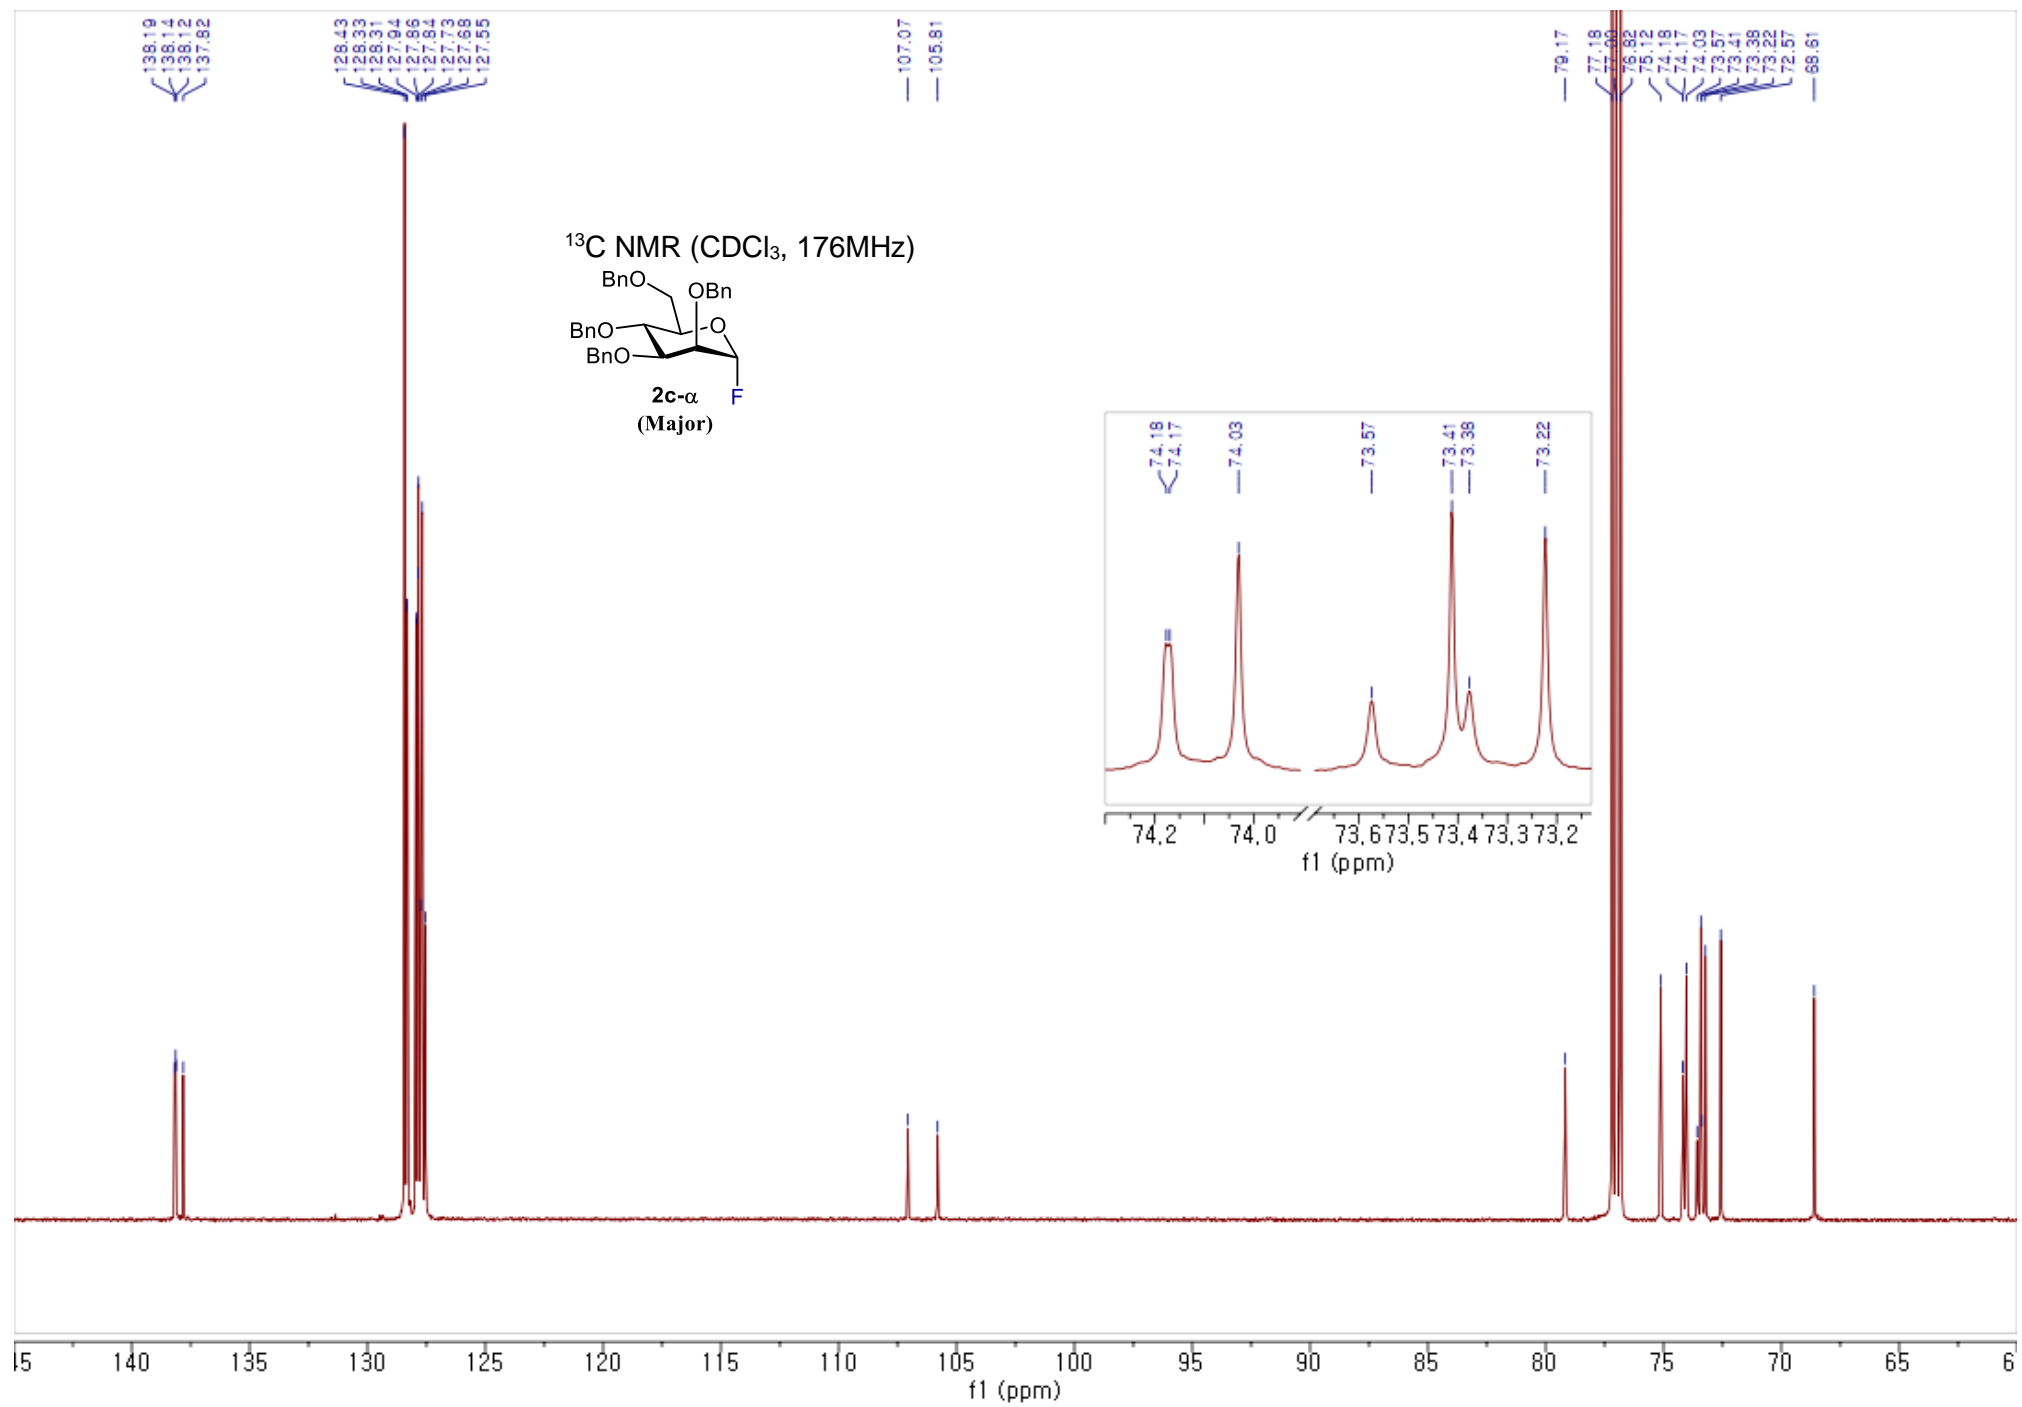

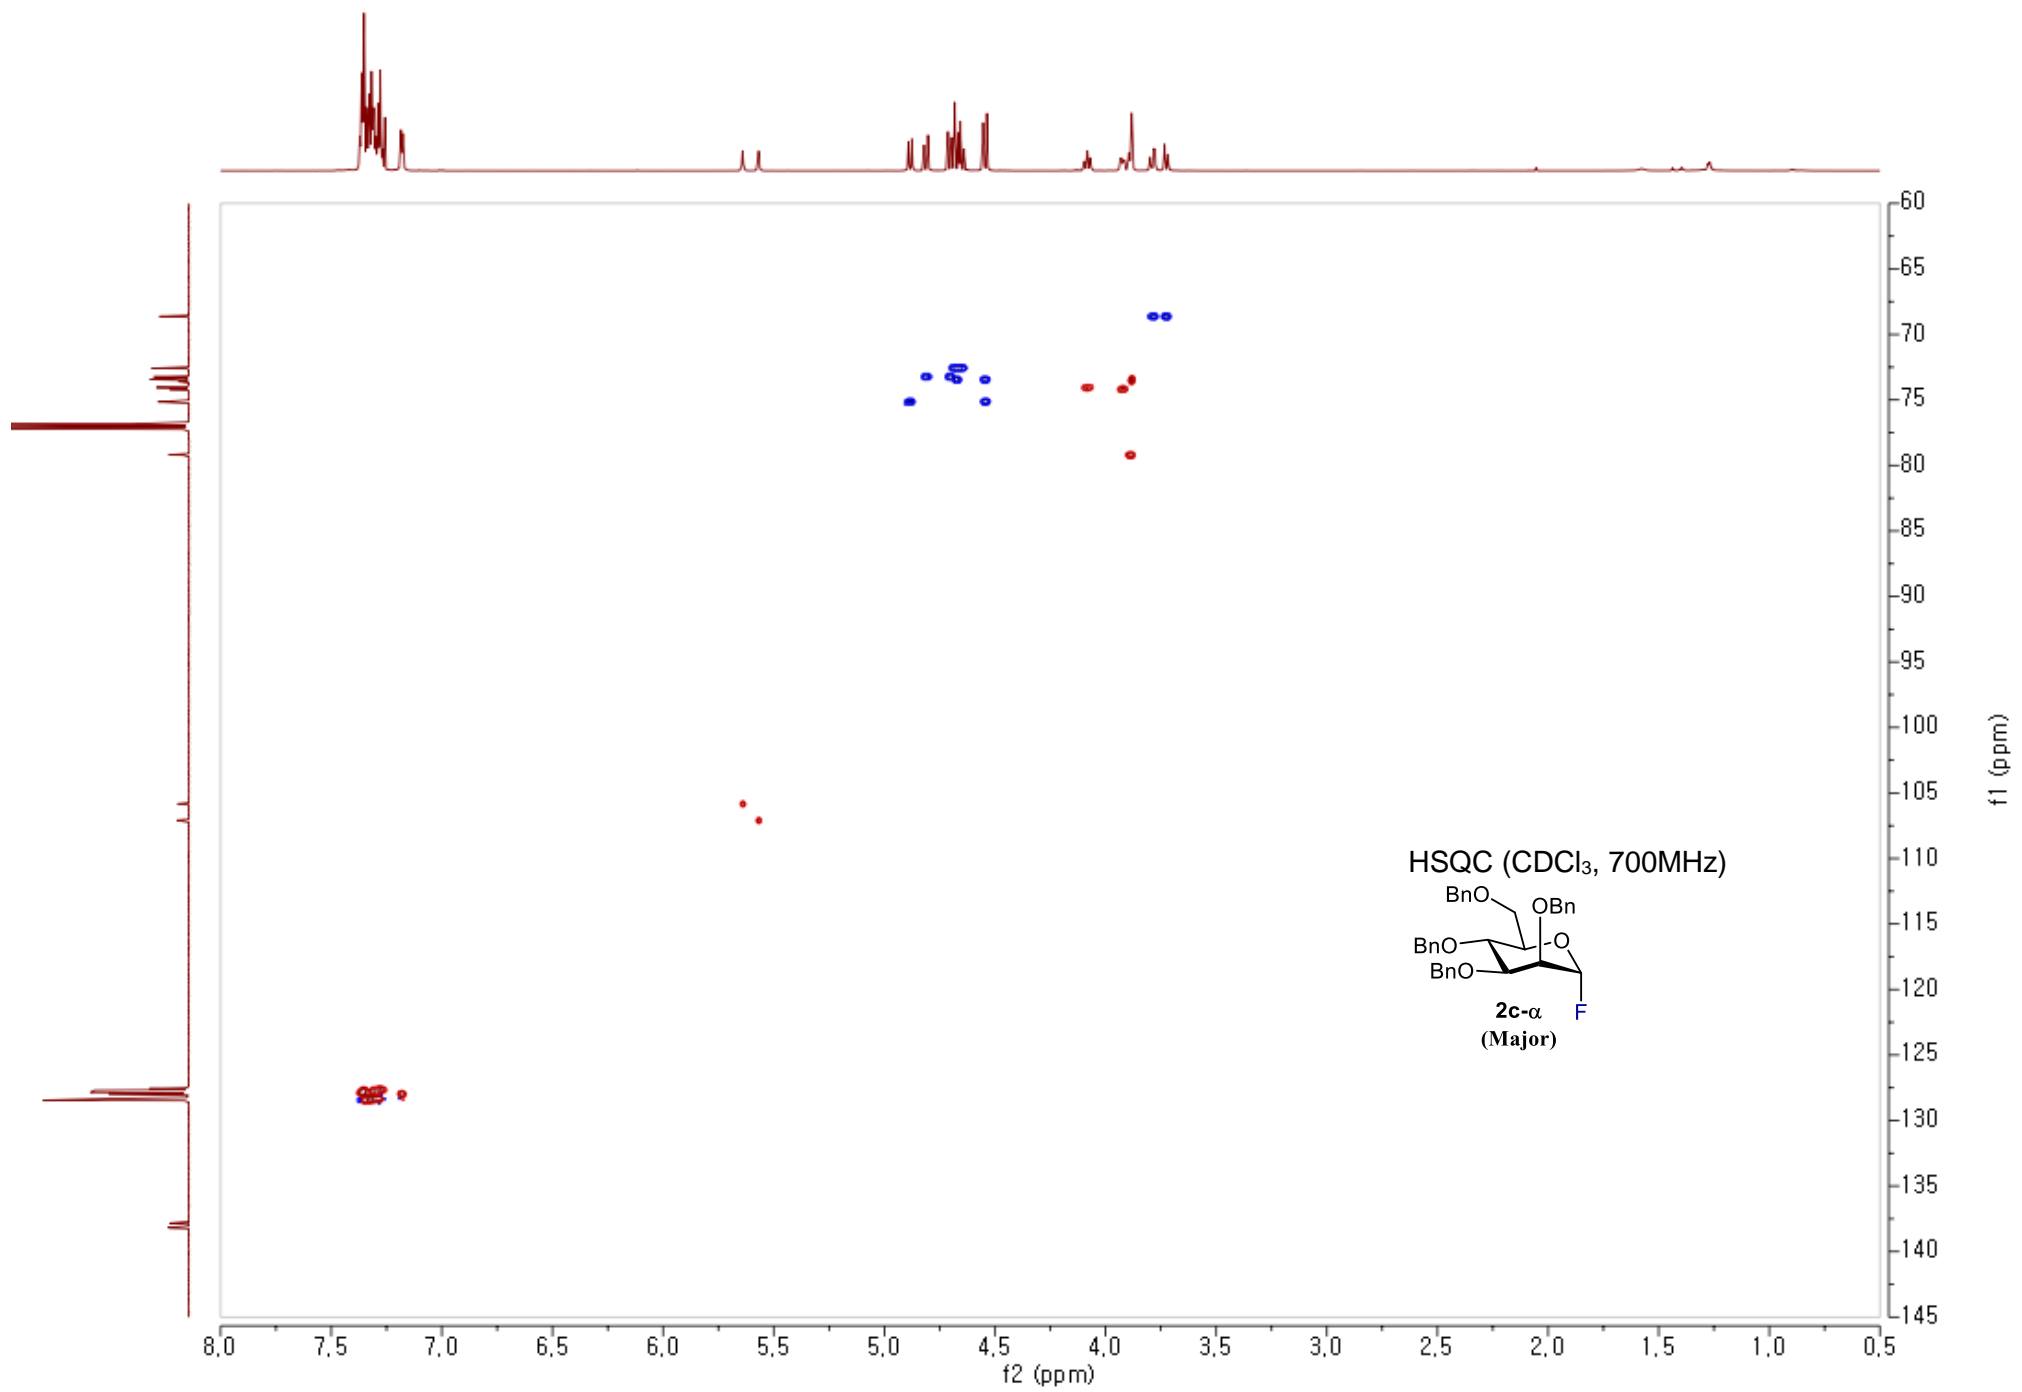

After Work-up  
 $^{19}\text{F}$  NMR ( $\text{CDCl}_3$ , 564 MHz)

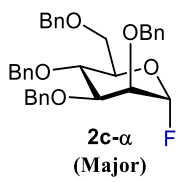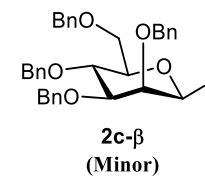

-138.02  
-138.11

-140.92  
-140.94  
-141.01  
-141.03

22.21

1.00

f1 (ppm)

After Purification

$^{19}\text{F}$  NMR ( $\text{CDCl}_3$ , 564 MHz)

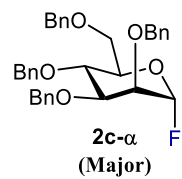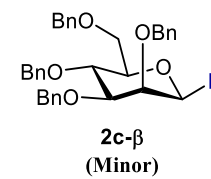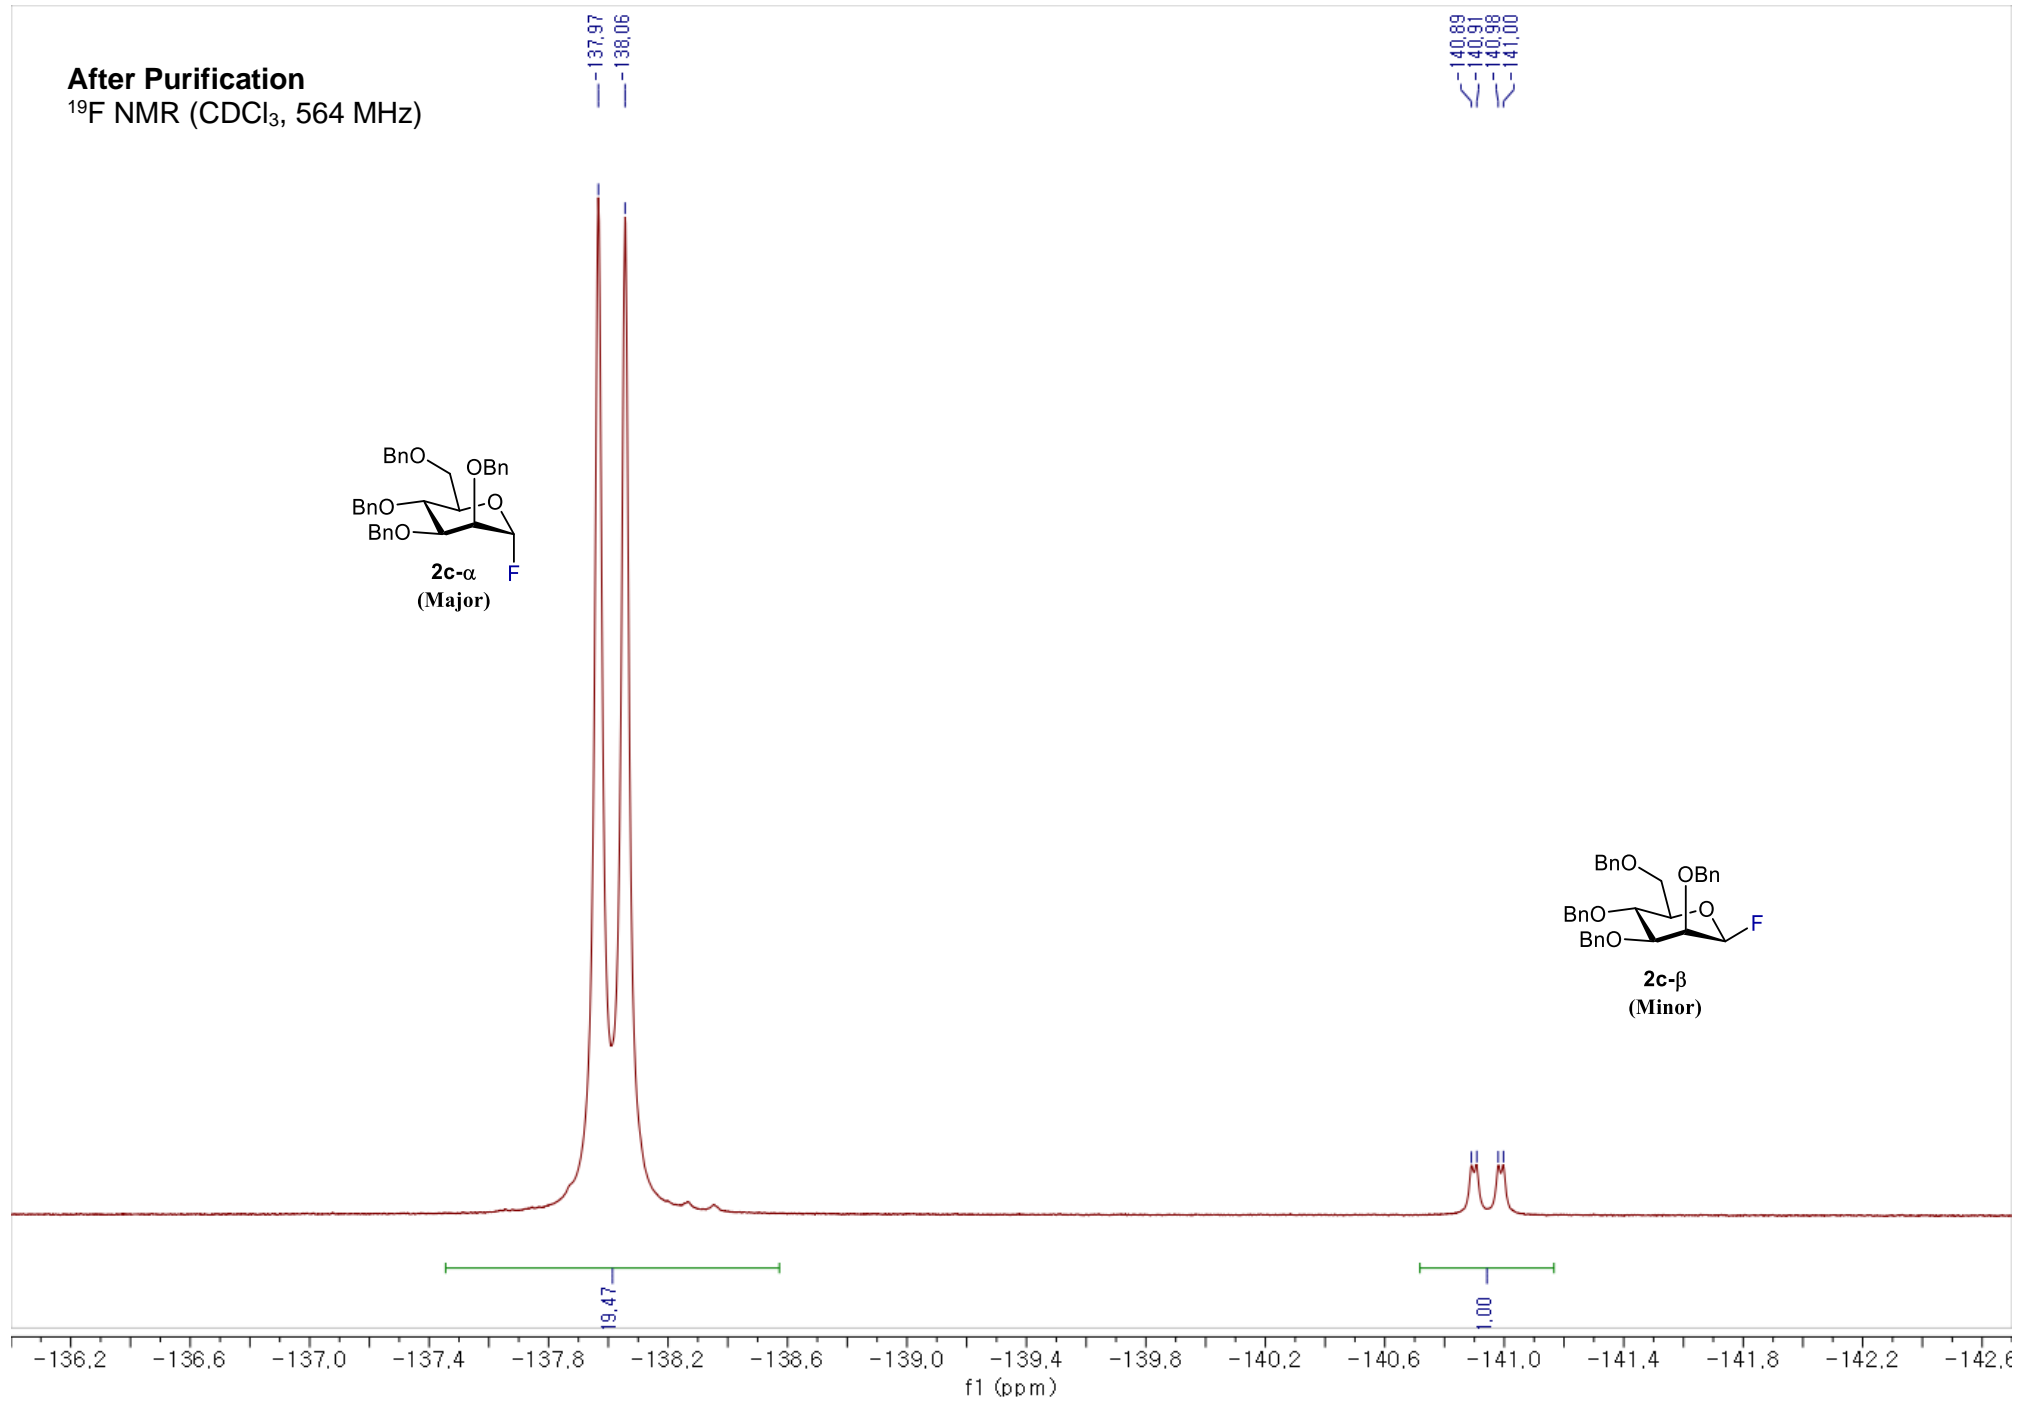



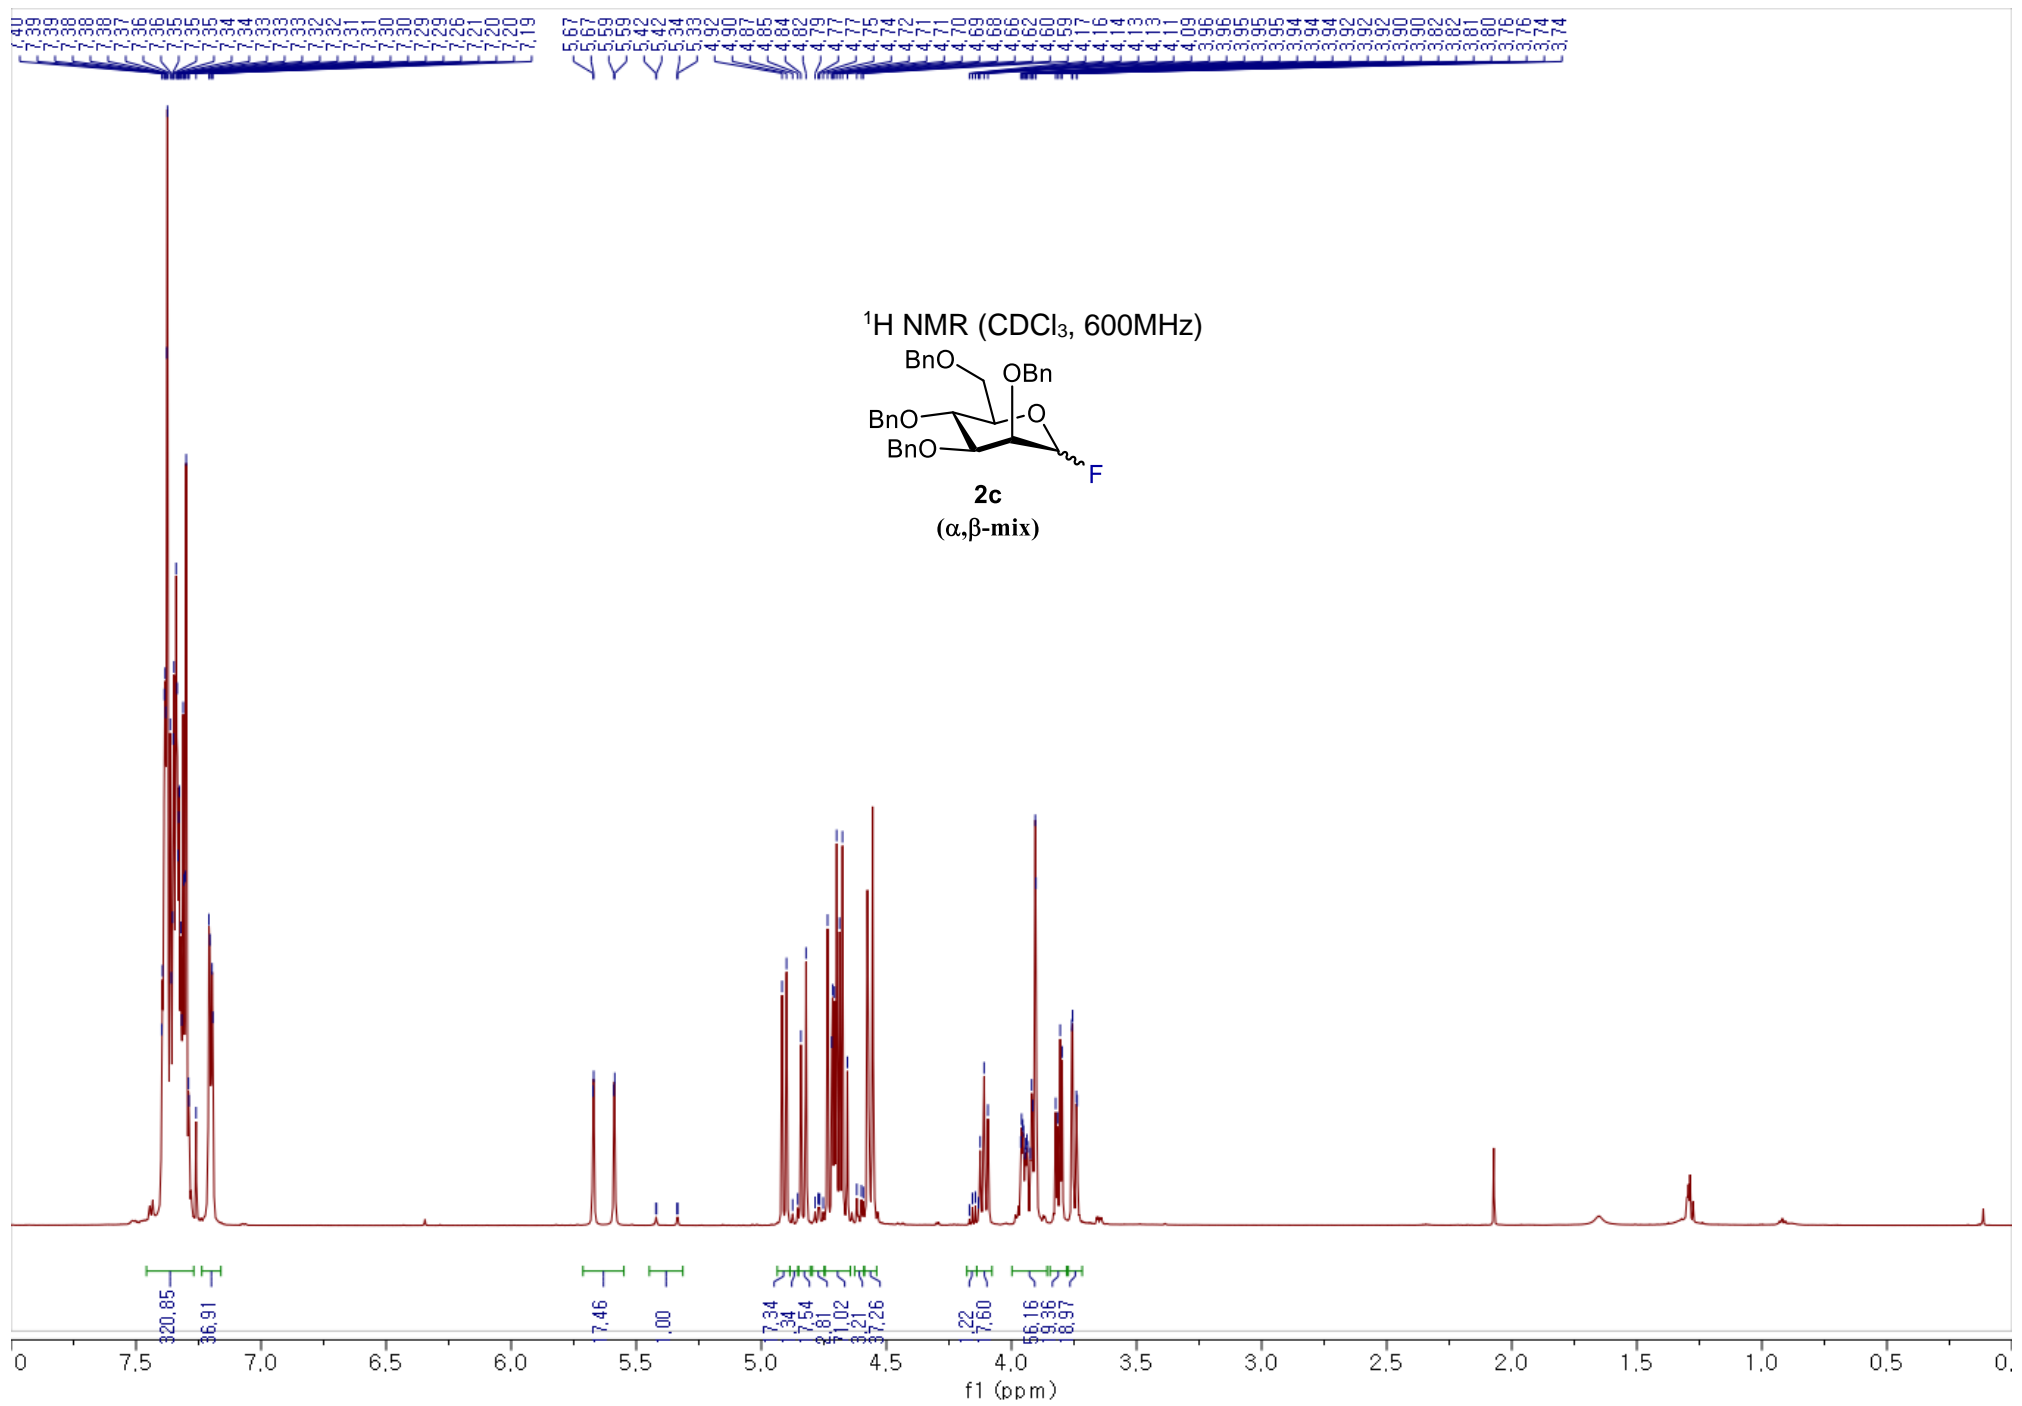

2,3,4-tris-O-(phenylmethyl)-D-xylopyranosyl fluoride (2d, Isolated as  $\alpha : \beta = 1 : 2.4$  mixture)

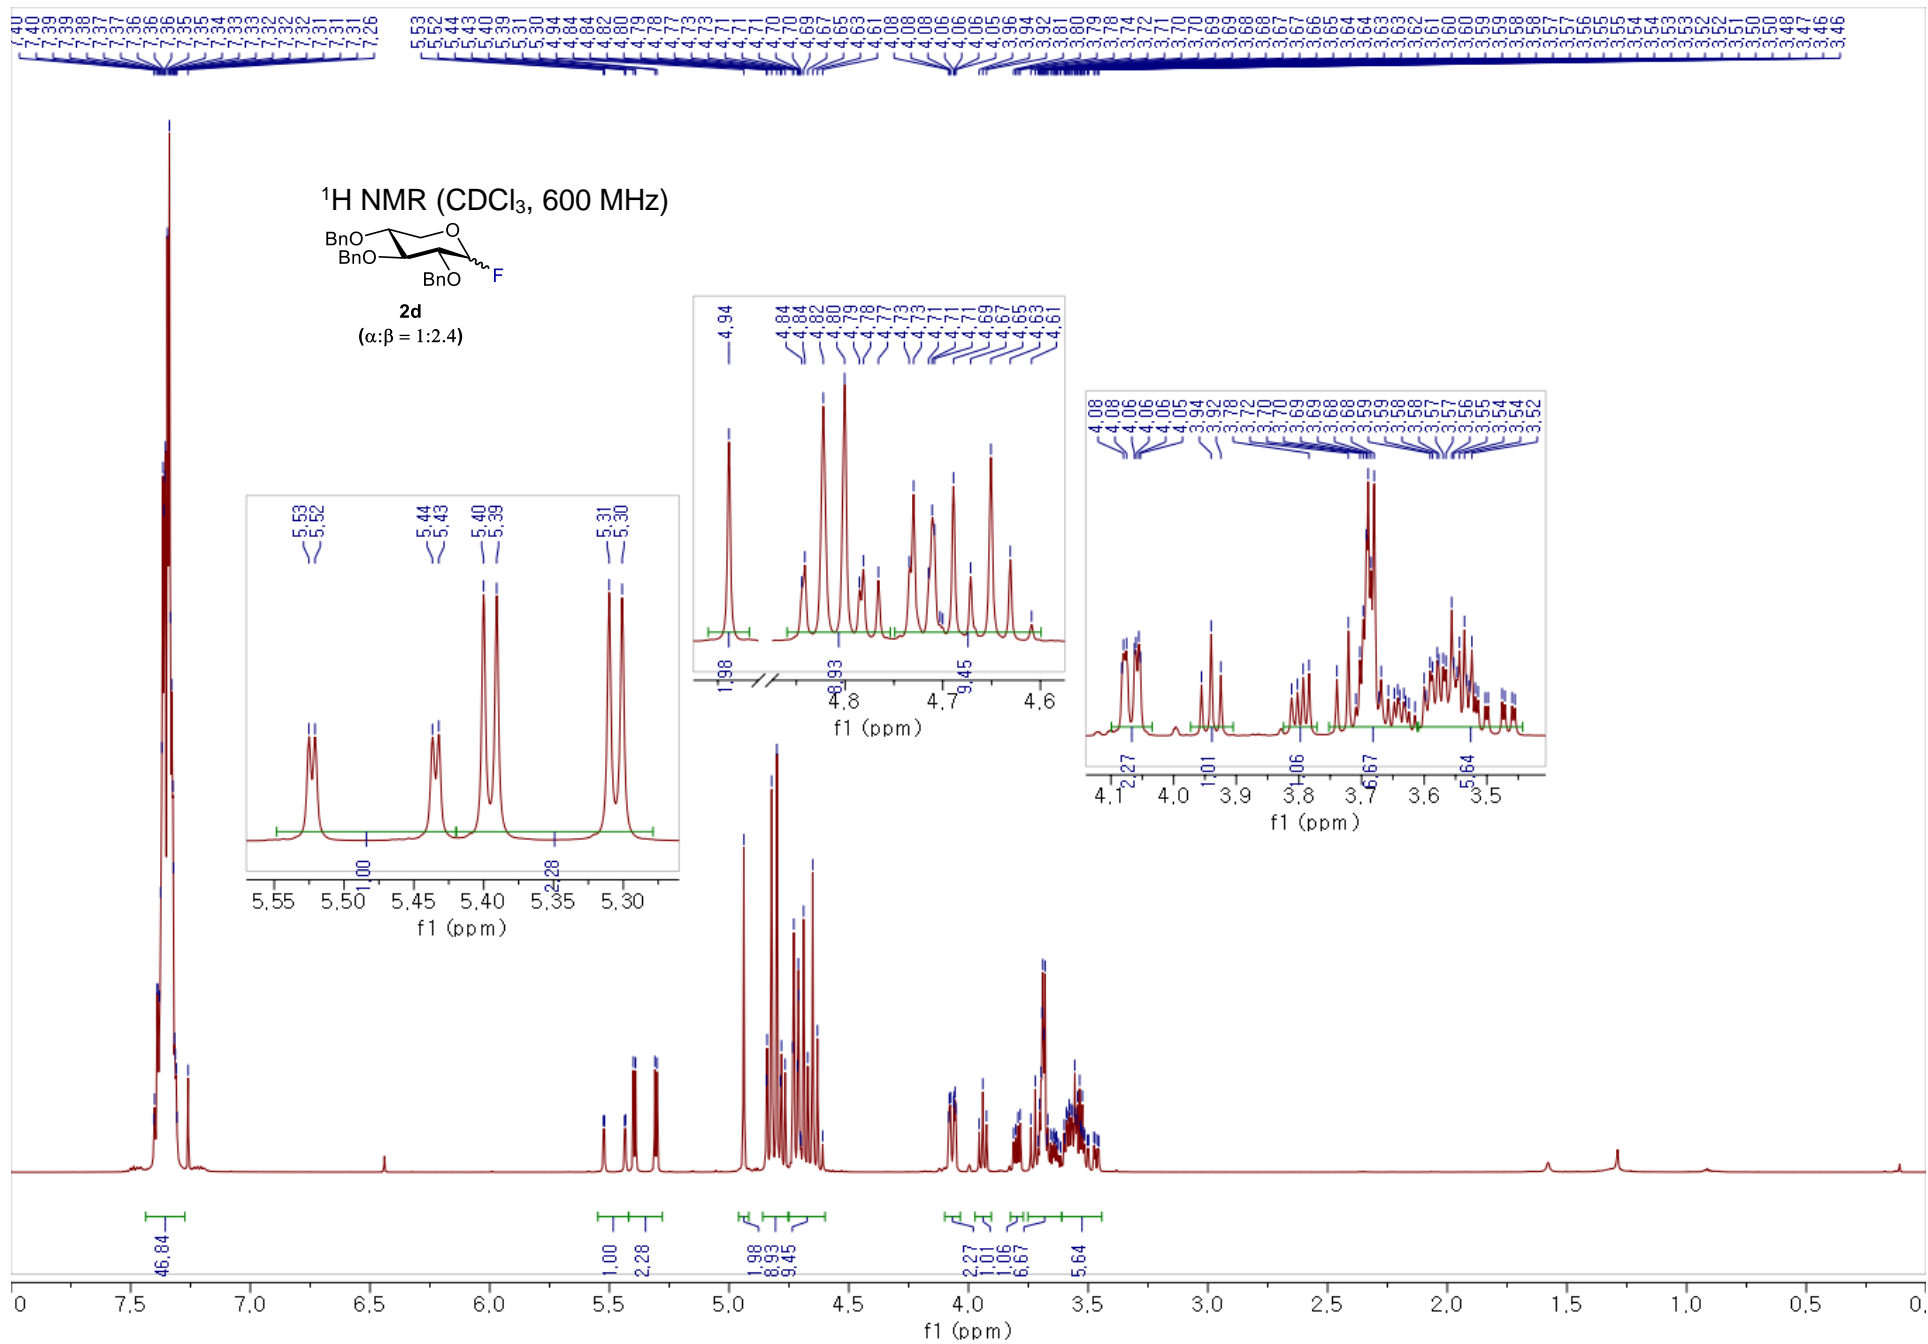

After Work-up  
<sup>19</sup>F NMR (CDCl<sub>3</sub>, 564 MHz)

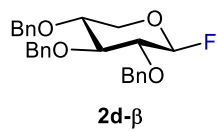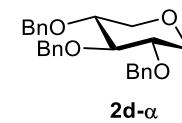

134.49  
134.51  
134.59  
134.61

151.01  
151.06  
151.11  
151.15

2.75

1.00

f1 (ppm)

After Purification  
<sup>19</sup>F NMR (CDCl<sub>3</sub>, 564 MHz)

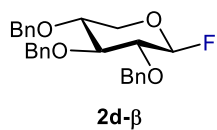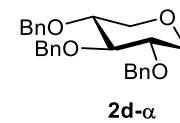

134.45  
134.47  
134.55  
134.57

150.97  
151.02  
151.07  
151.11

2.64

1.00

-131.5 -132.5 -133.5 -134.5 -135.5 -136.5 -137.5 -148.0 -149.0 -150.0 -151.0 -152.0 -153.0 -15

f1 (ppm)

4-Tris-O-(phenylmethyl)- $\alpha$ -L-fucopyranosyl fluoride (2e- $\alpha$ , Major diastereomer)

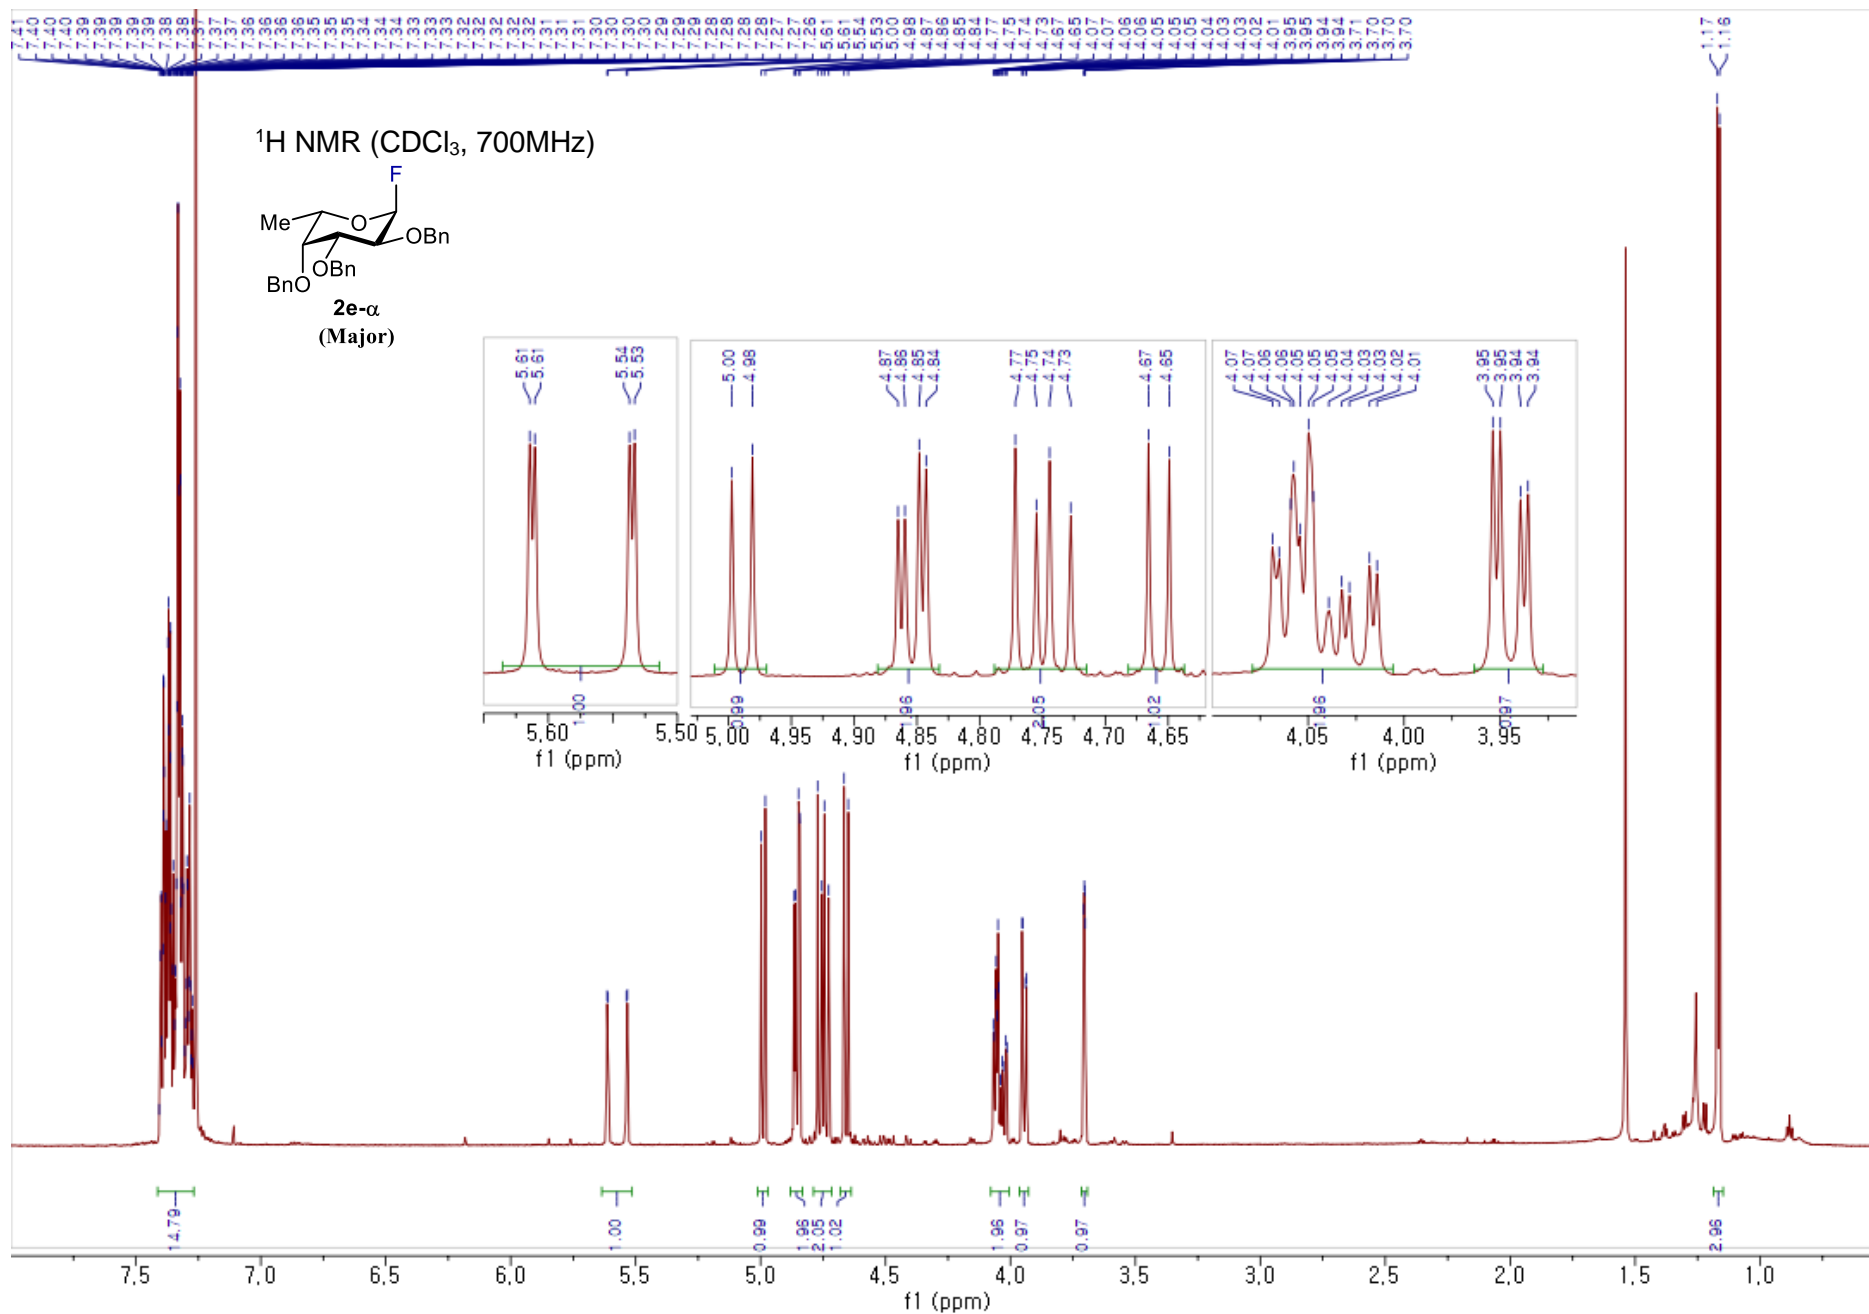

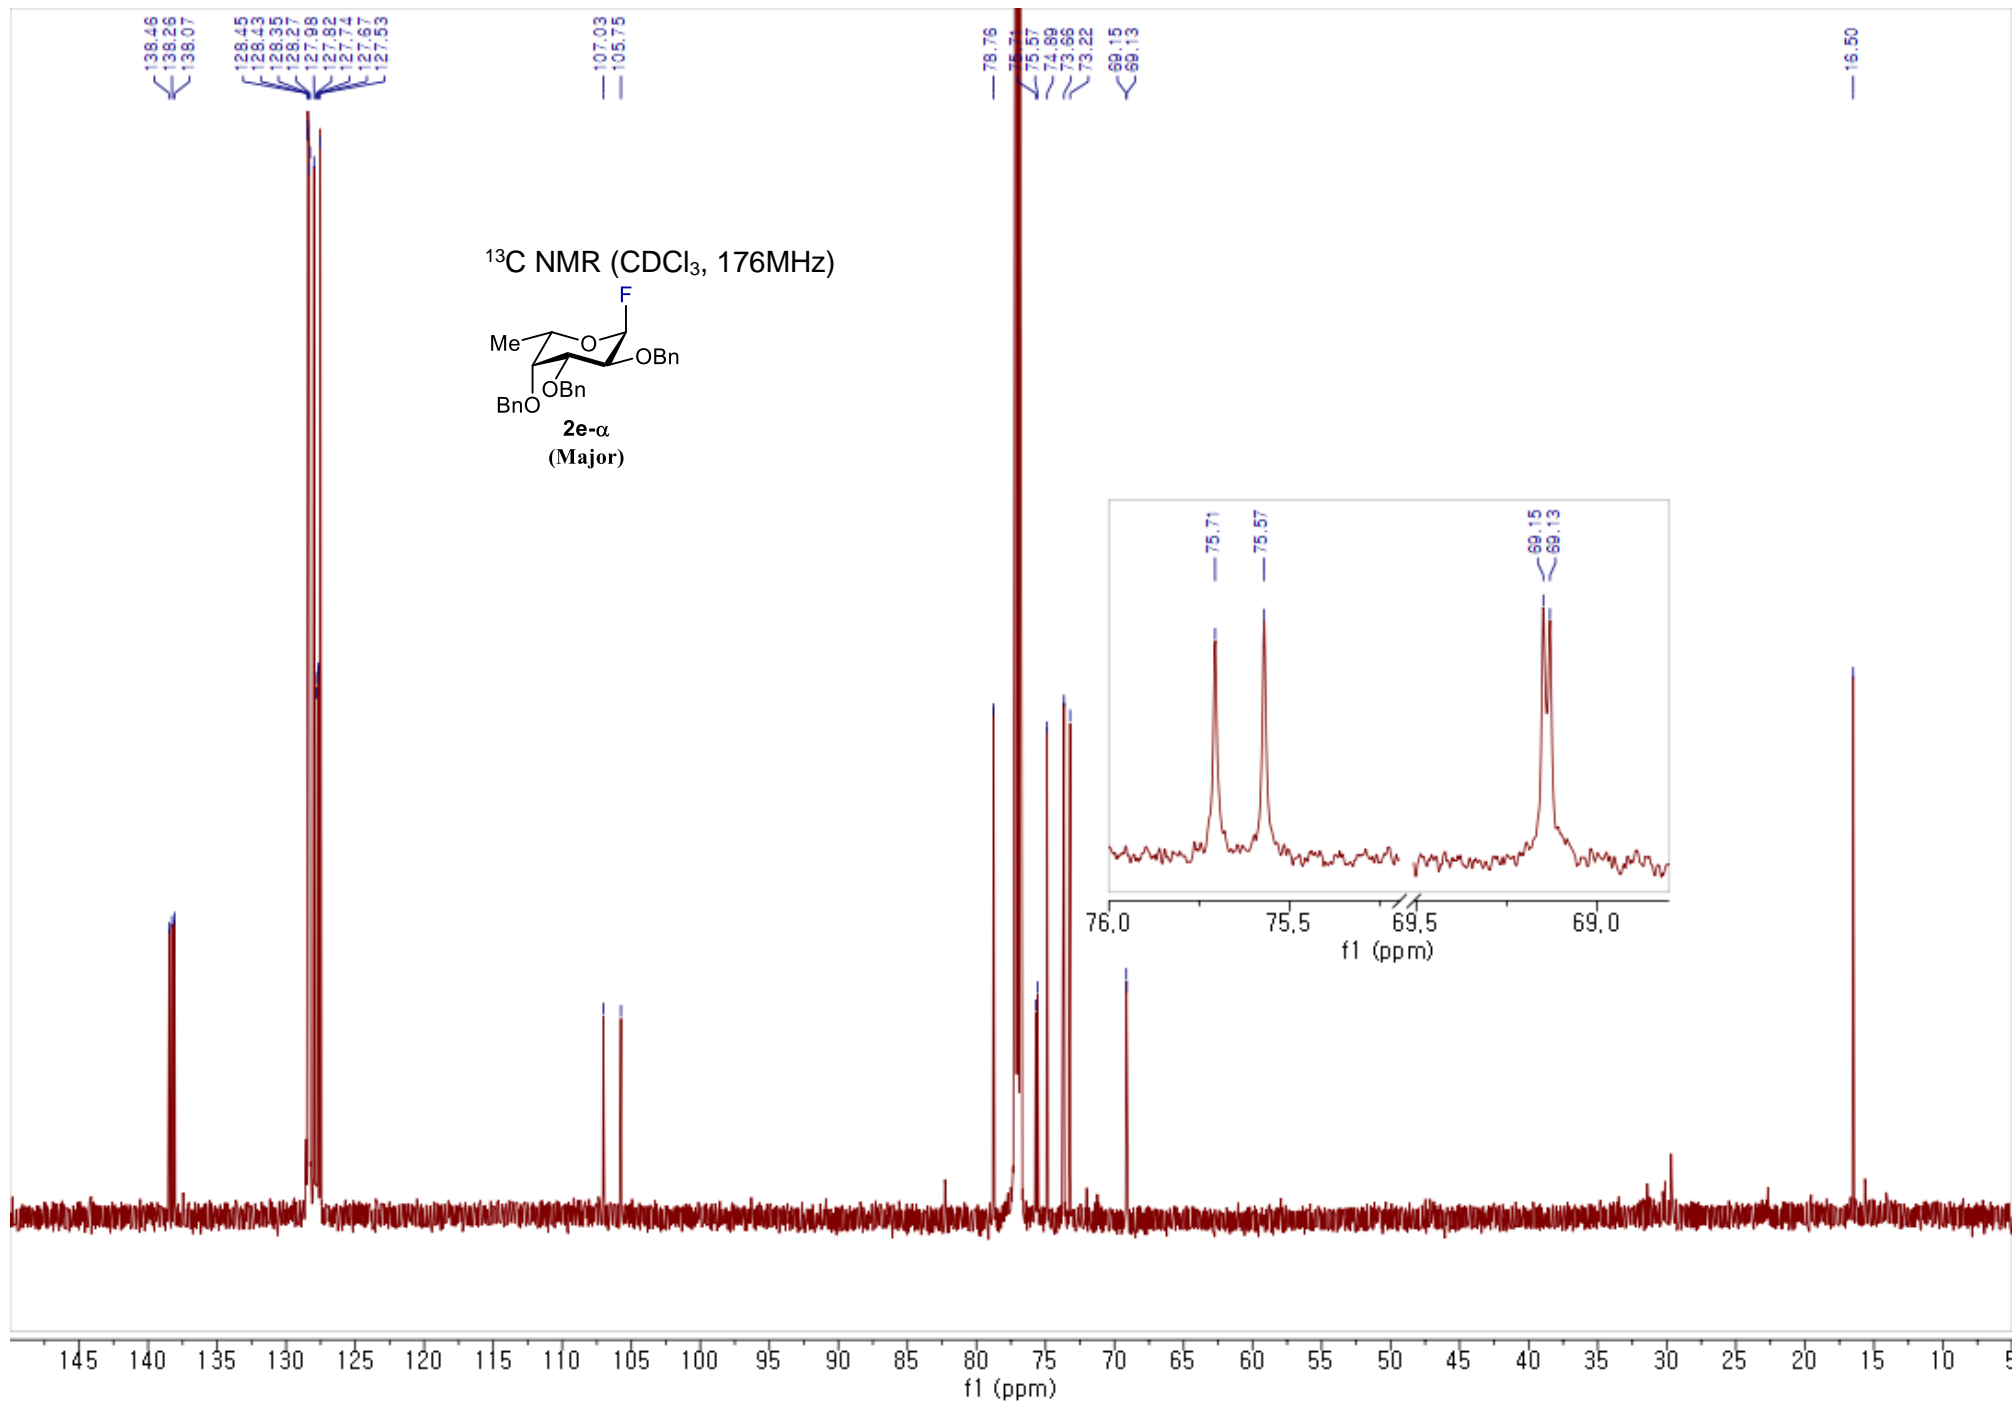

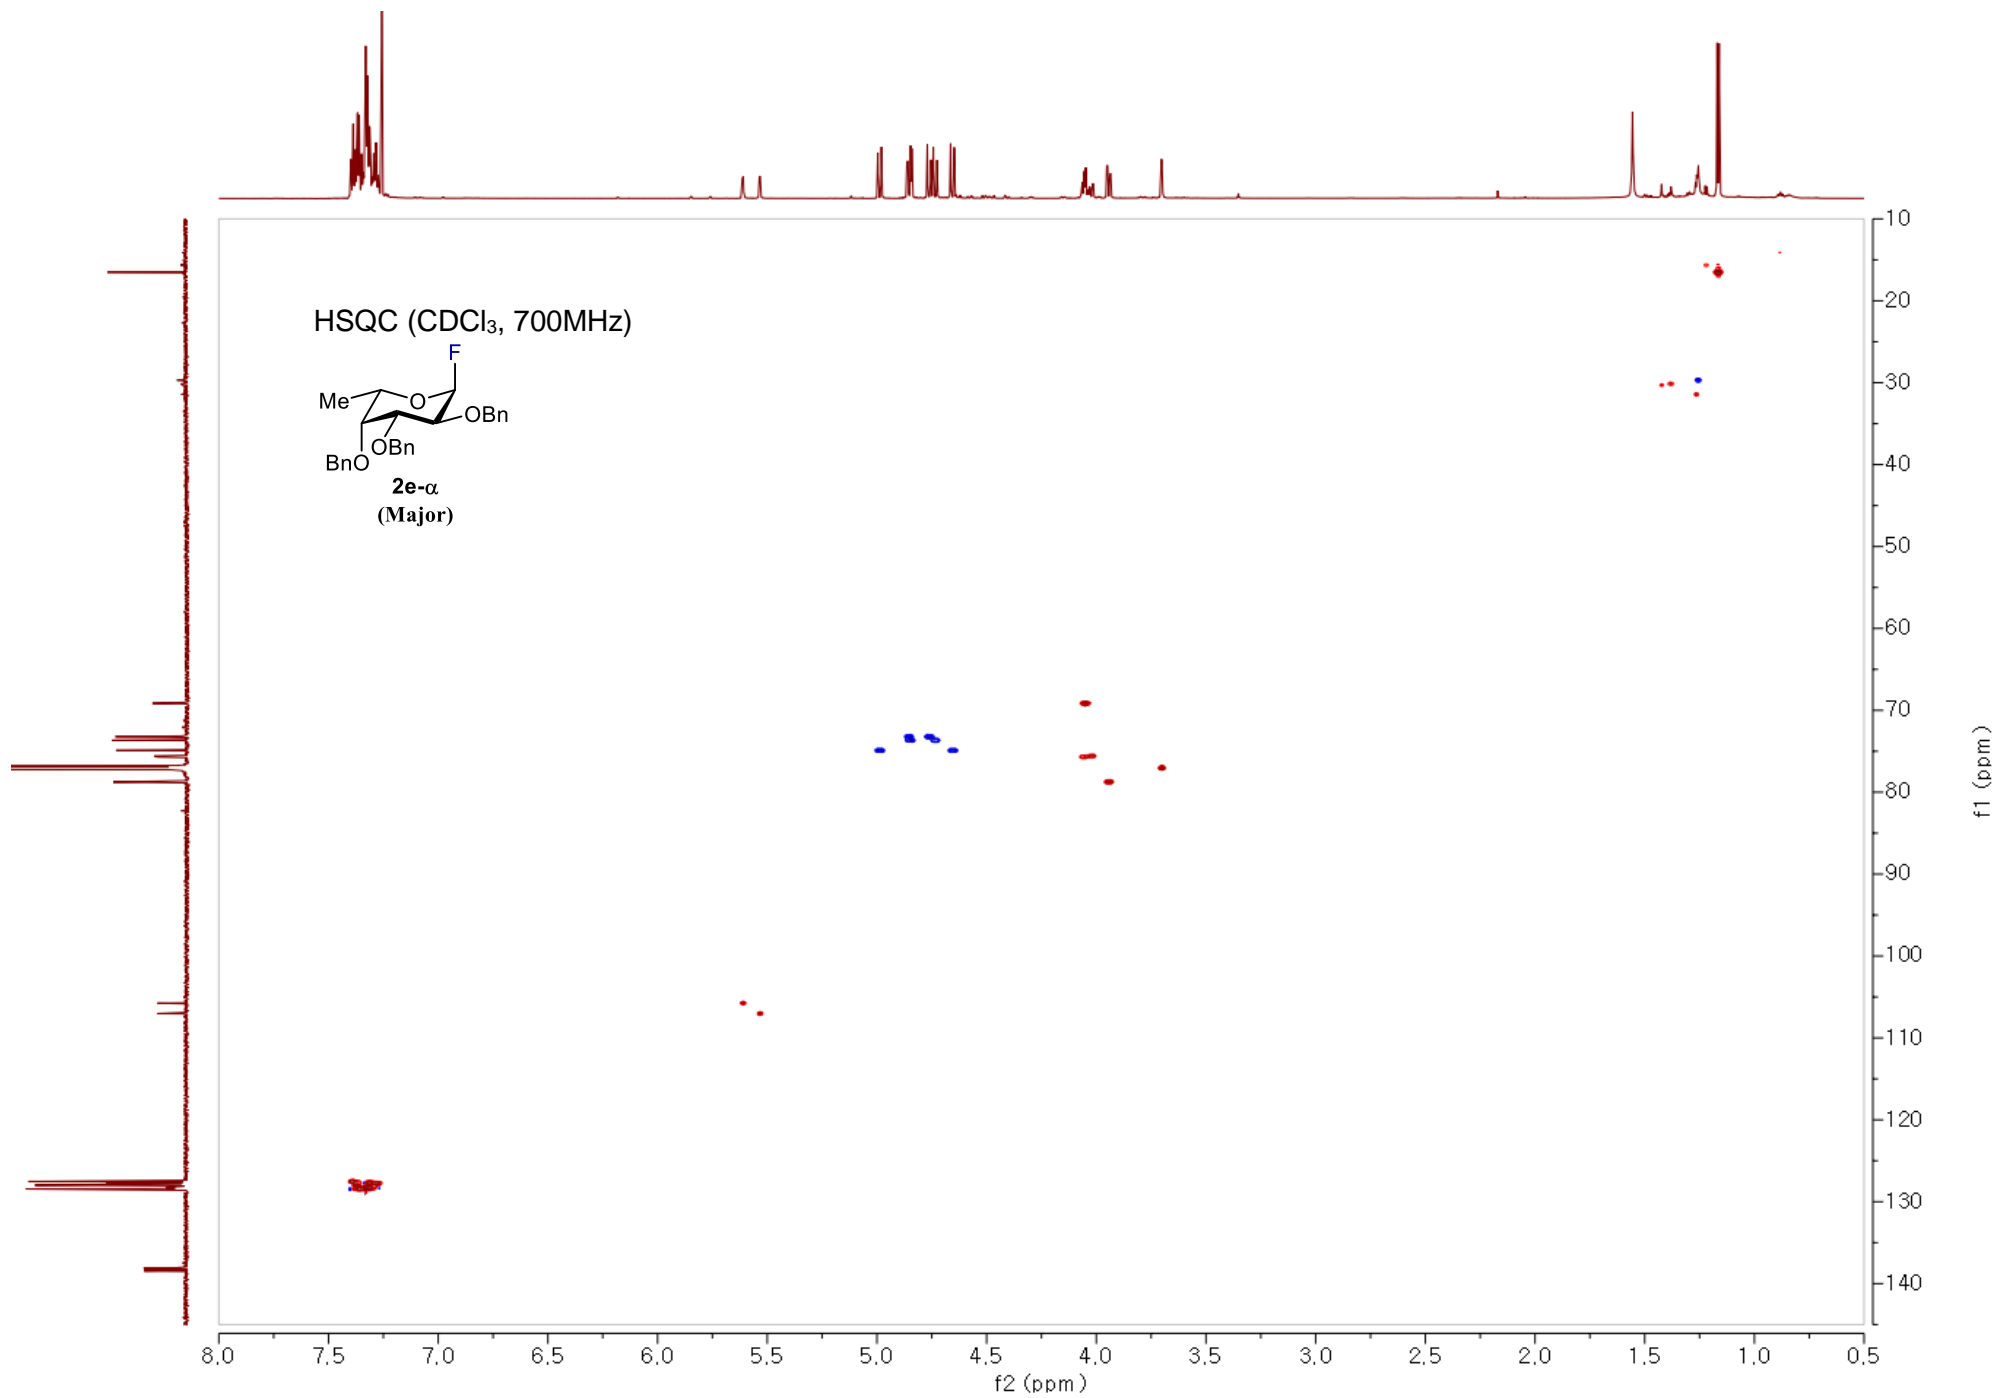





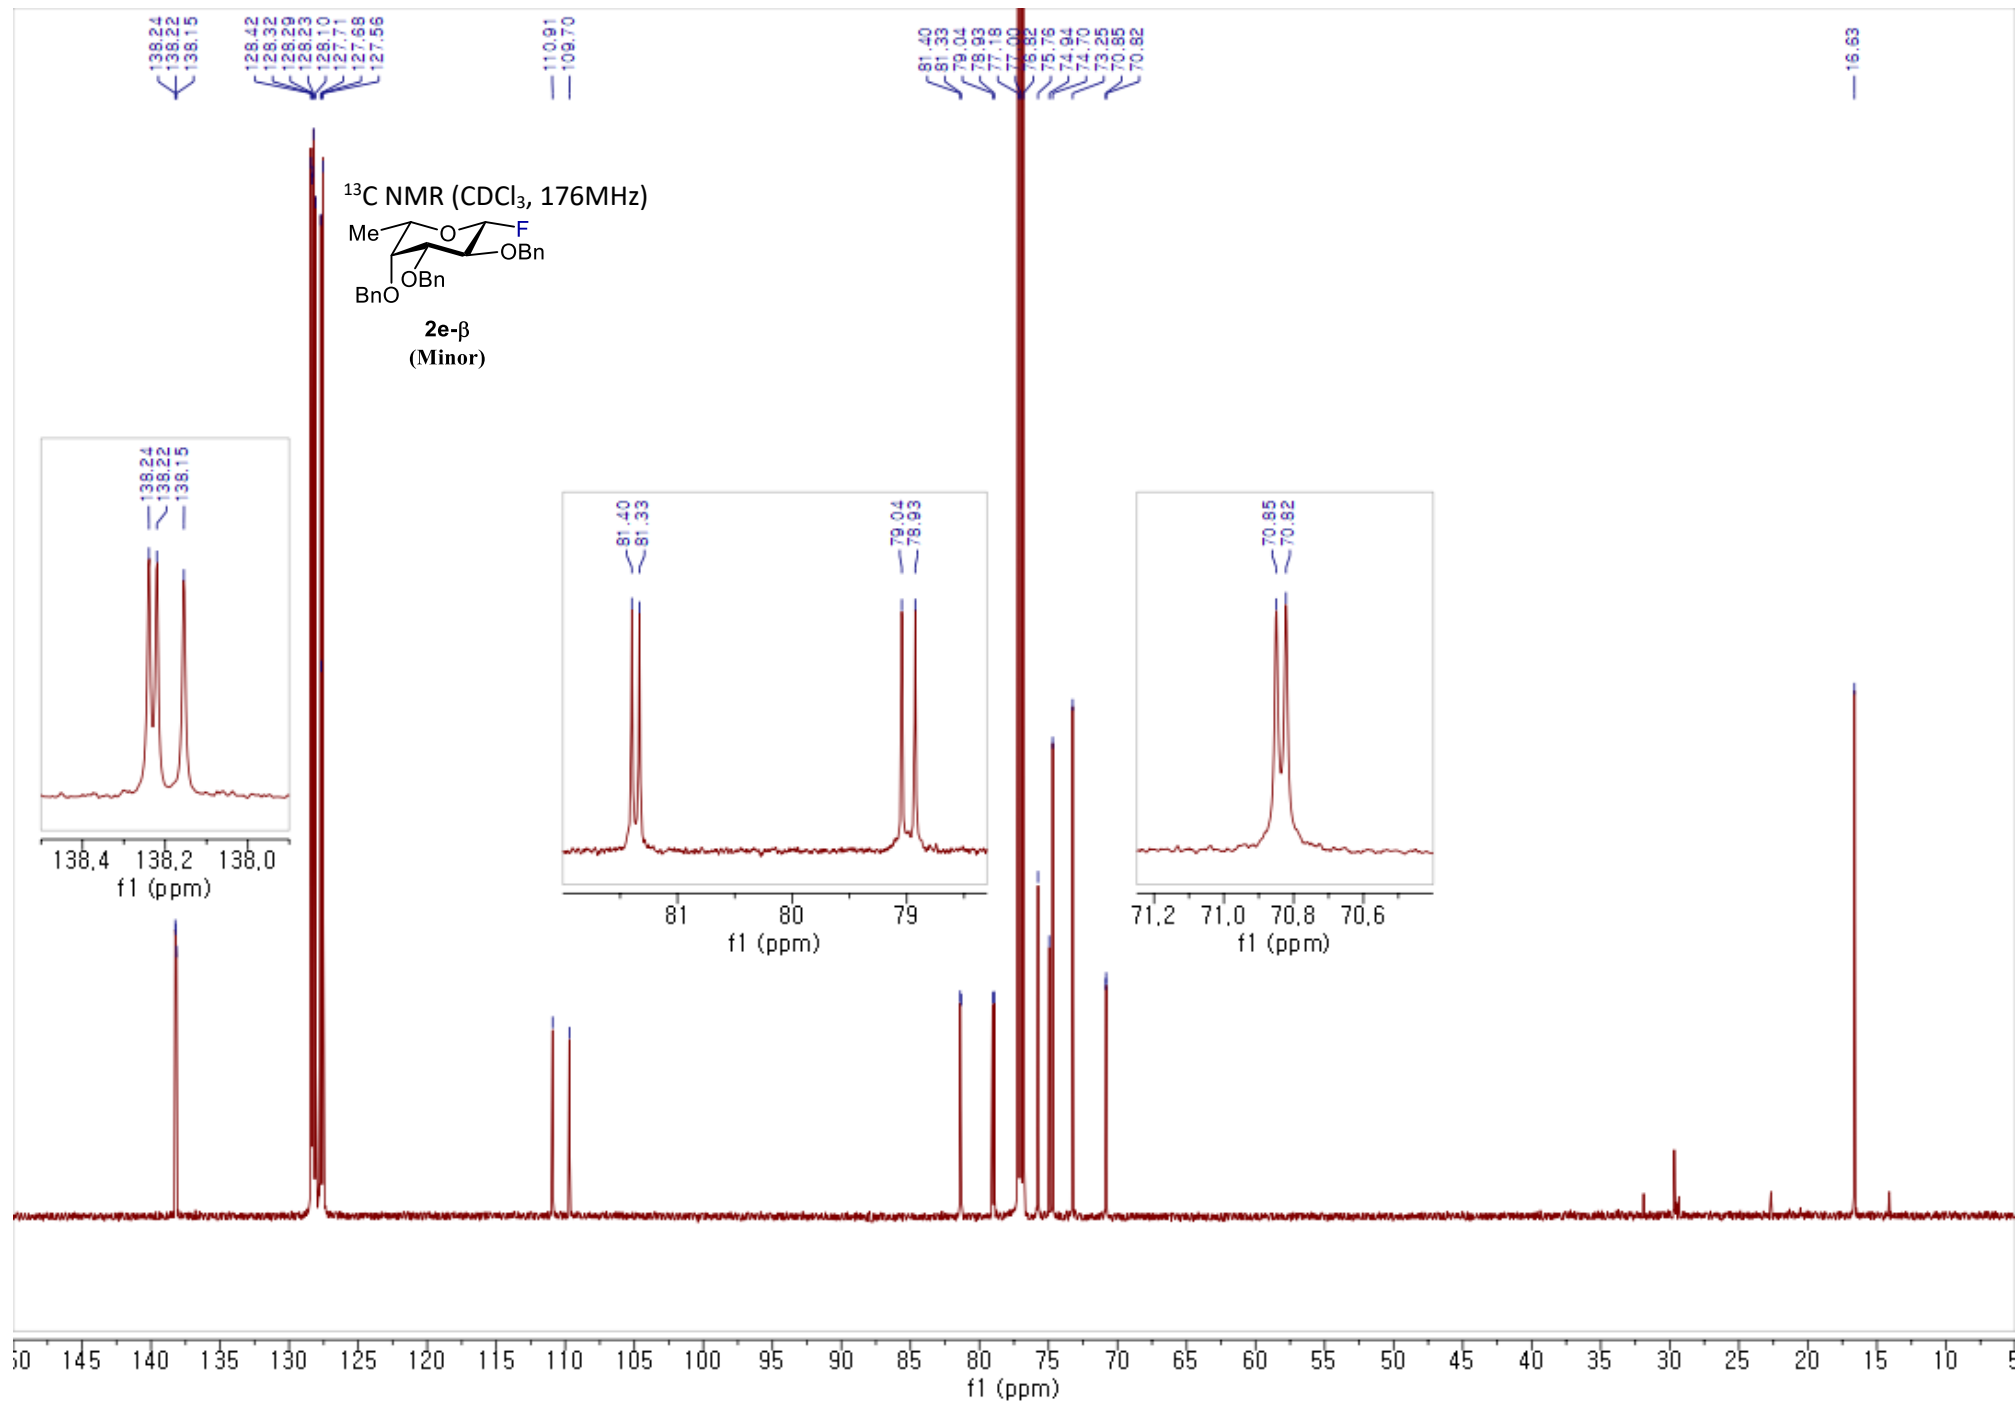

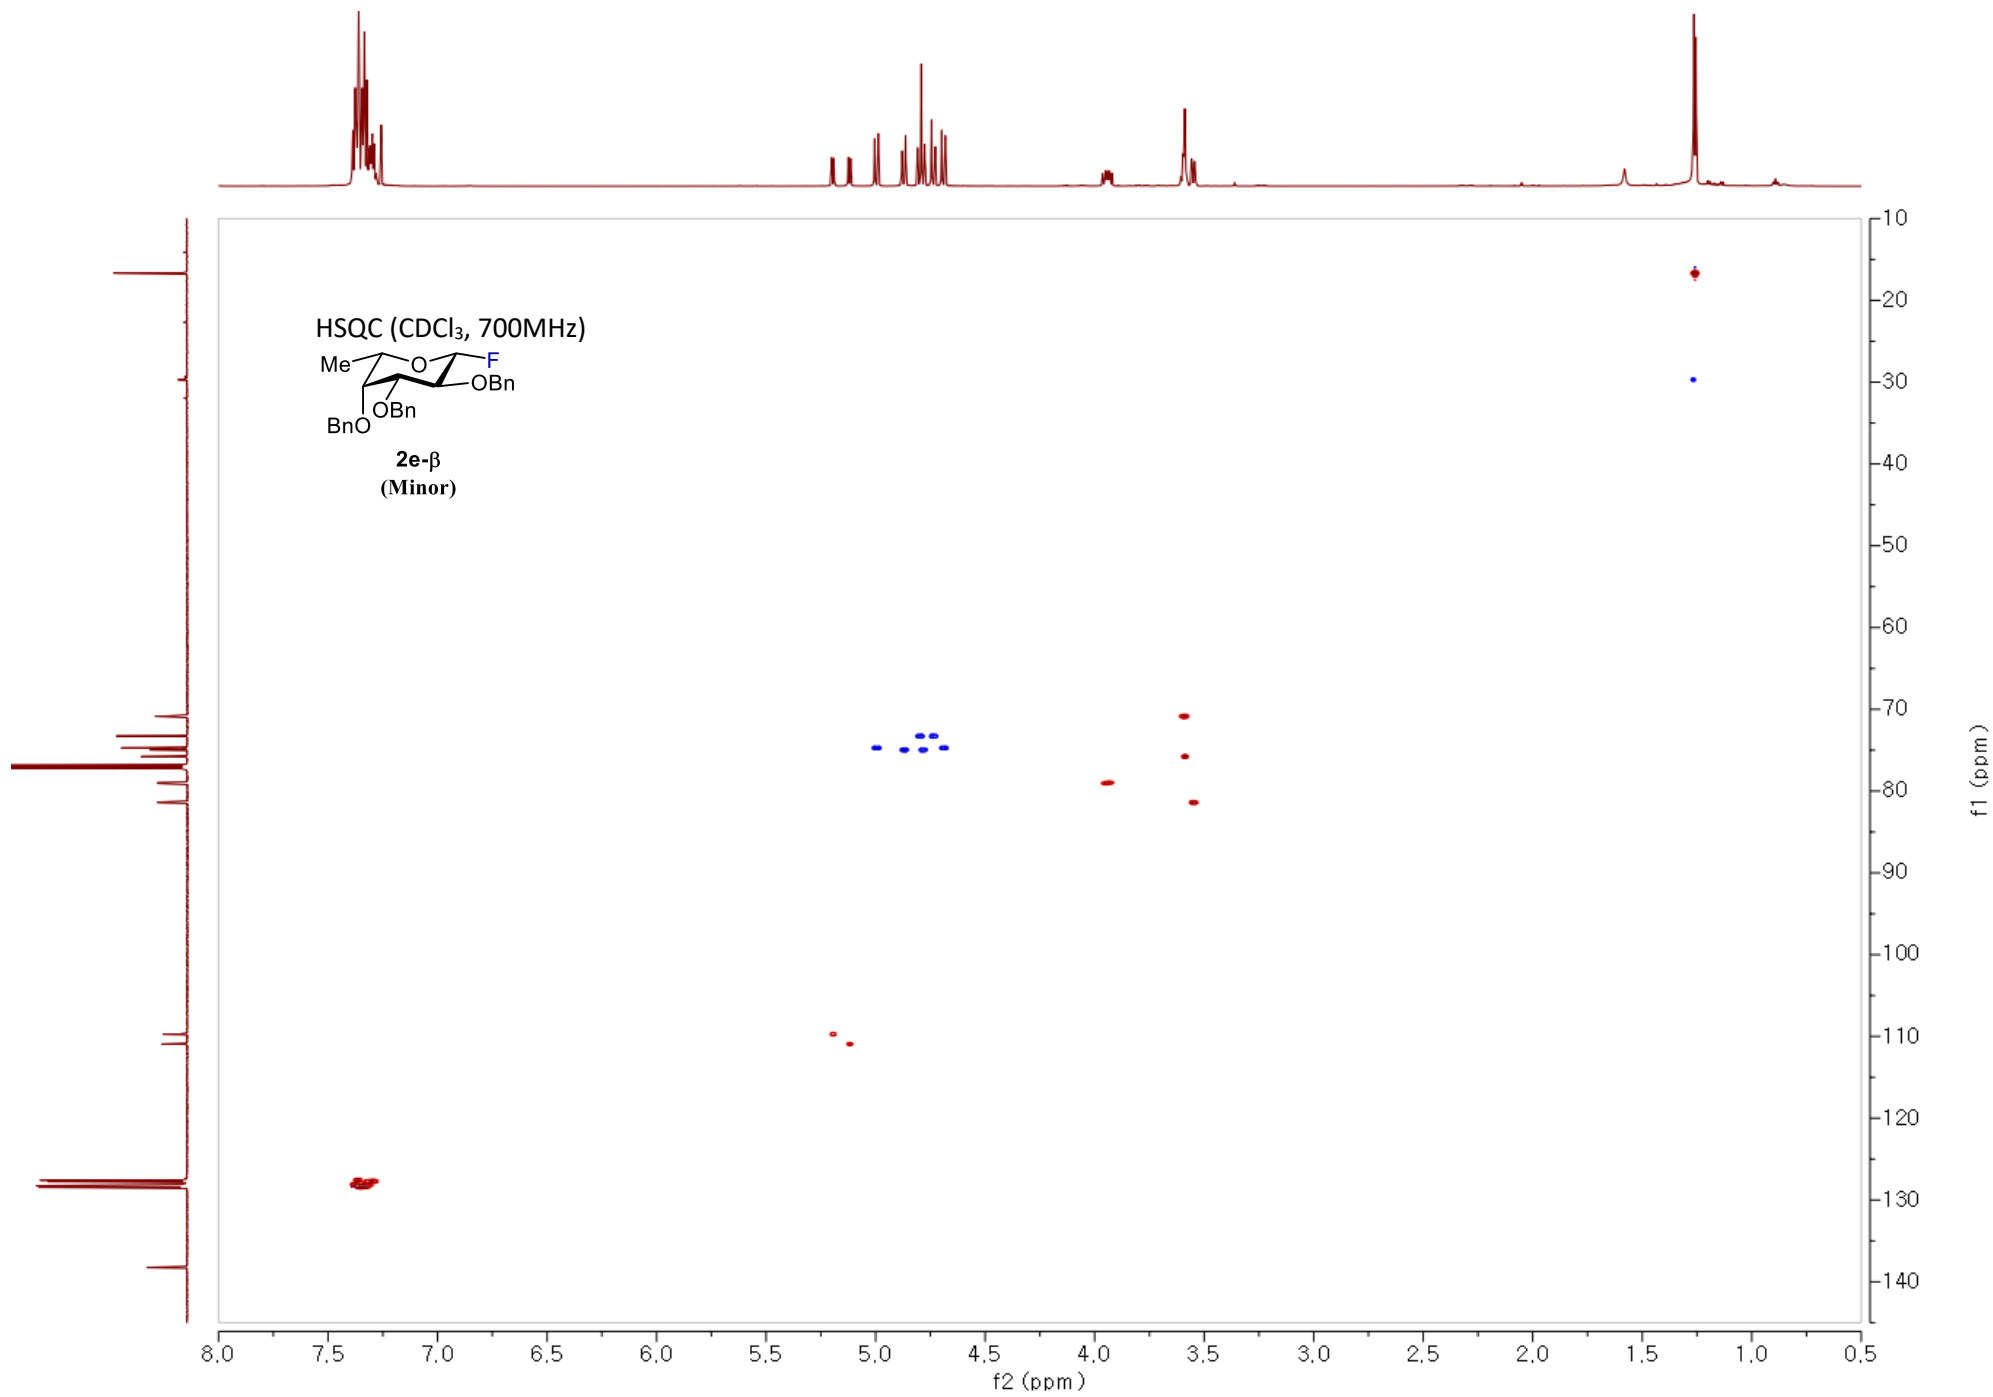

After Work-up

$^{19}\text{F}$  NMR ( $\text{CDCl}_3$ , 564MHz)

139.10  
139.19  
139.20  
139.22

149.64  
149.68  
149.73  
149.78

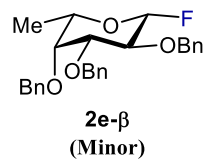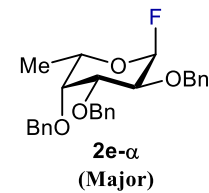

6.0 -136.5 -137.0 -137.5 -138.0 -138.5 -139.0 -139.5 -140.0 -140.5 -141.0 -141.5 -147.0 -148.0 -149.0 -150.0 -151.0 -152.0 -15

f1 (ppm)

95

1.00

1.86

After Purification

$^{19}\text{F}$  NMR ( $\text{CDCl}_3$ , 564MHz)

139.08  
139.10  
139.17  
139.19

149.61  
149.66  
149.71  
149.75

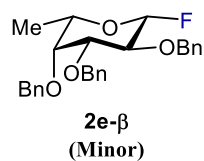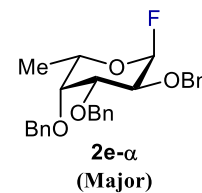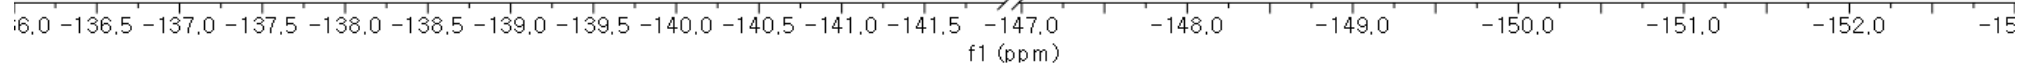

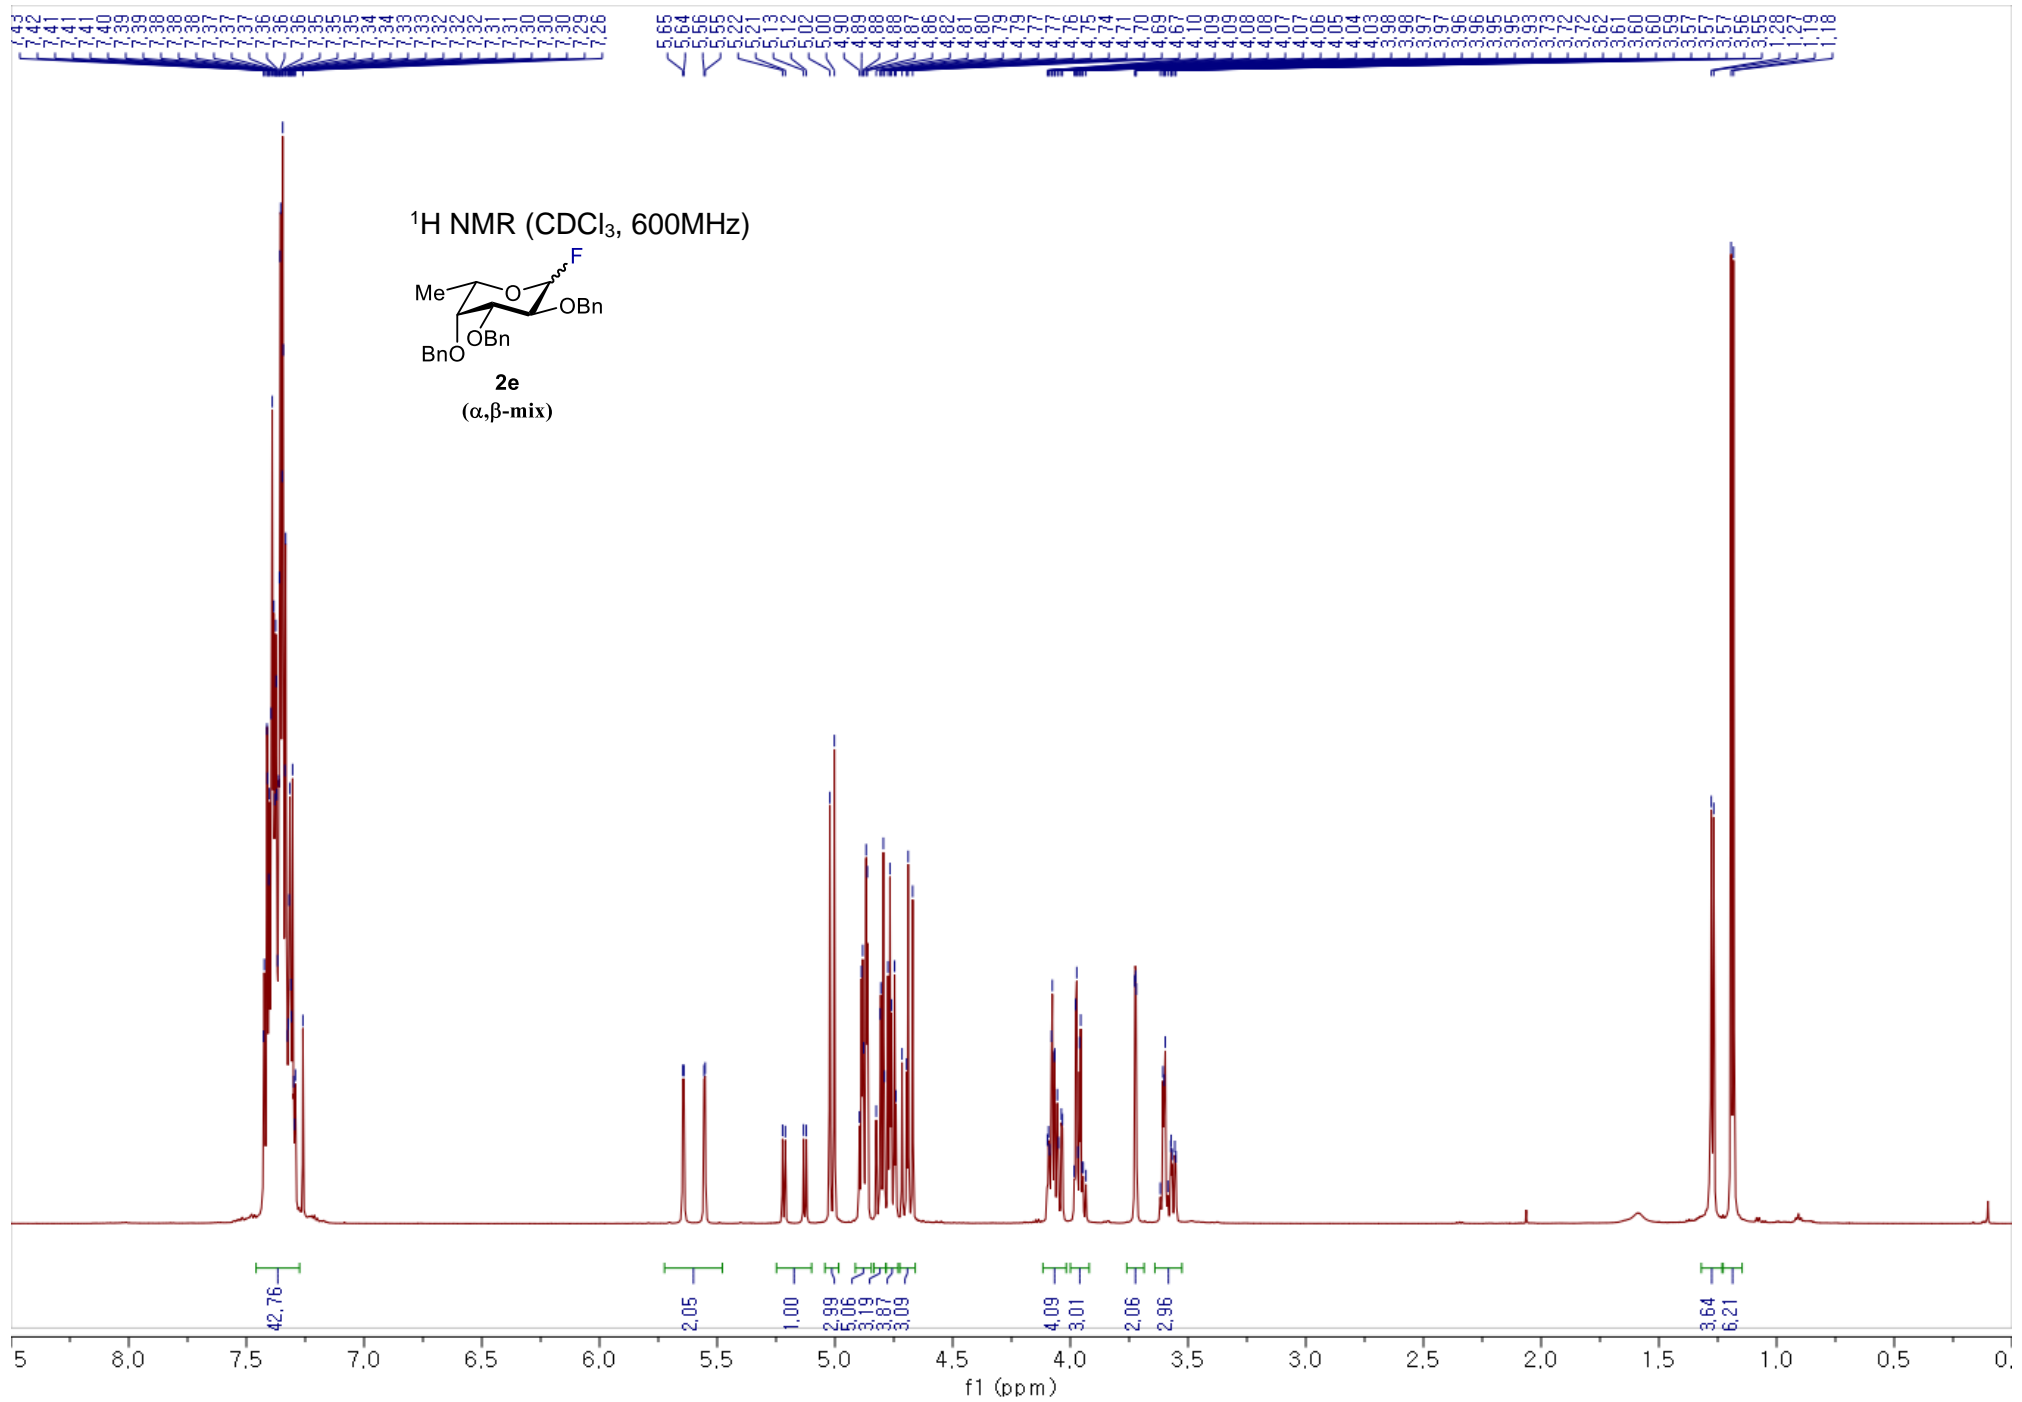

# 2,3,4-Tris-O-(phenylmethyl)- $\alpha$ -L-rhamnopyranosyl fluoride (2f- $\alpha$ , Major diastereomer)

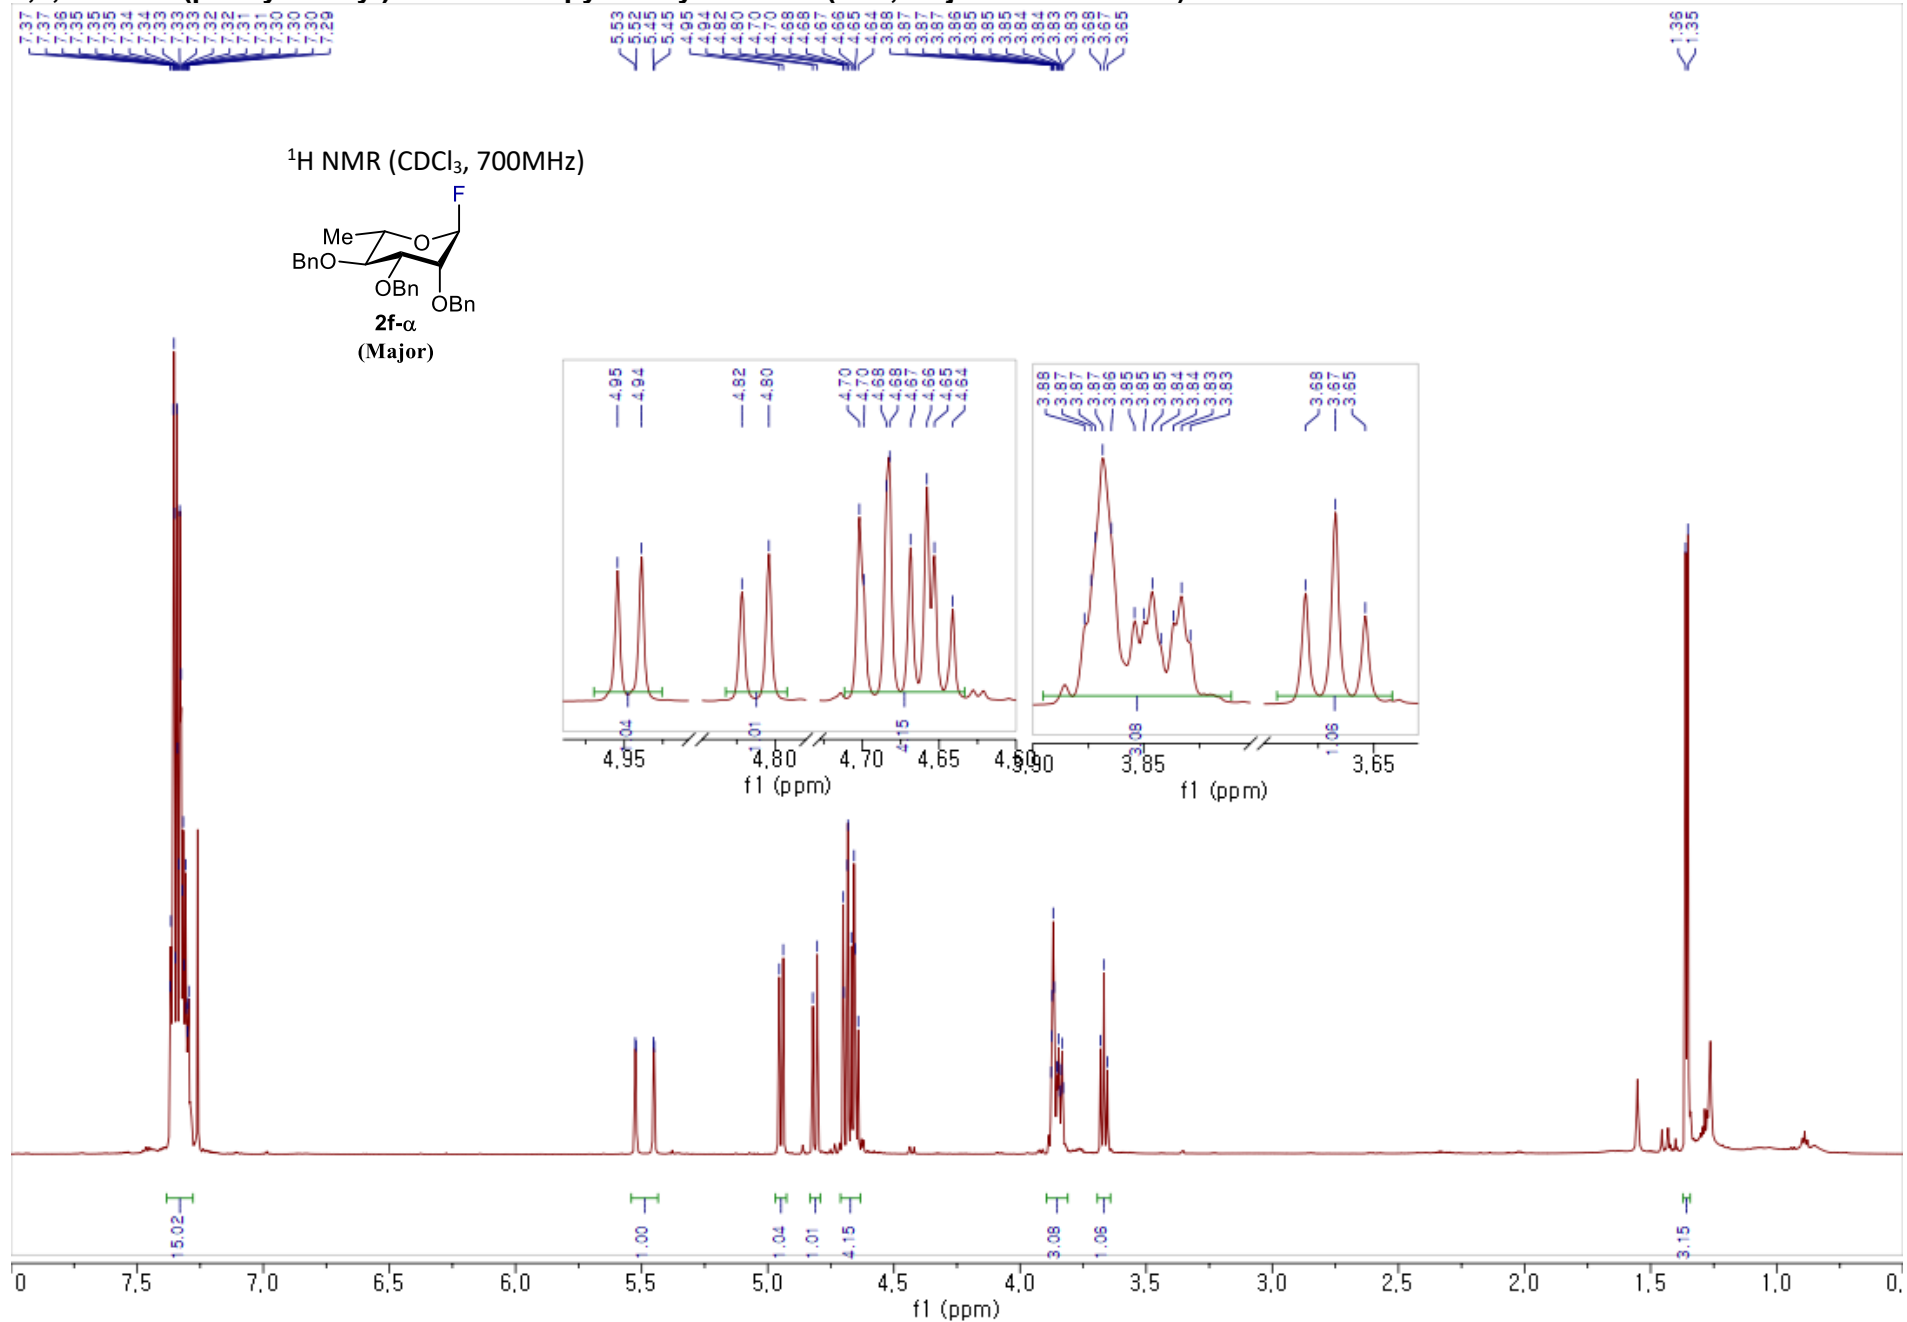

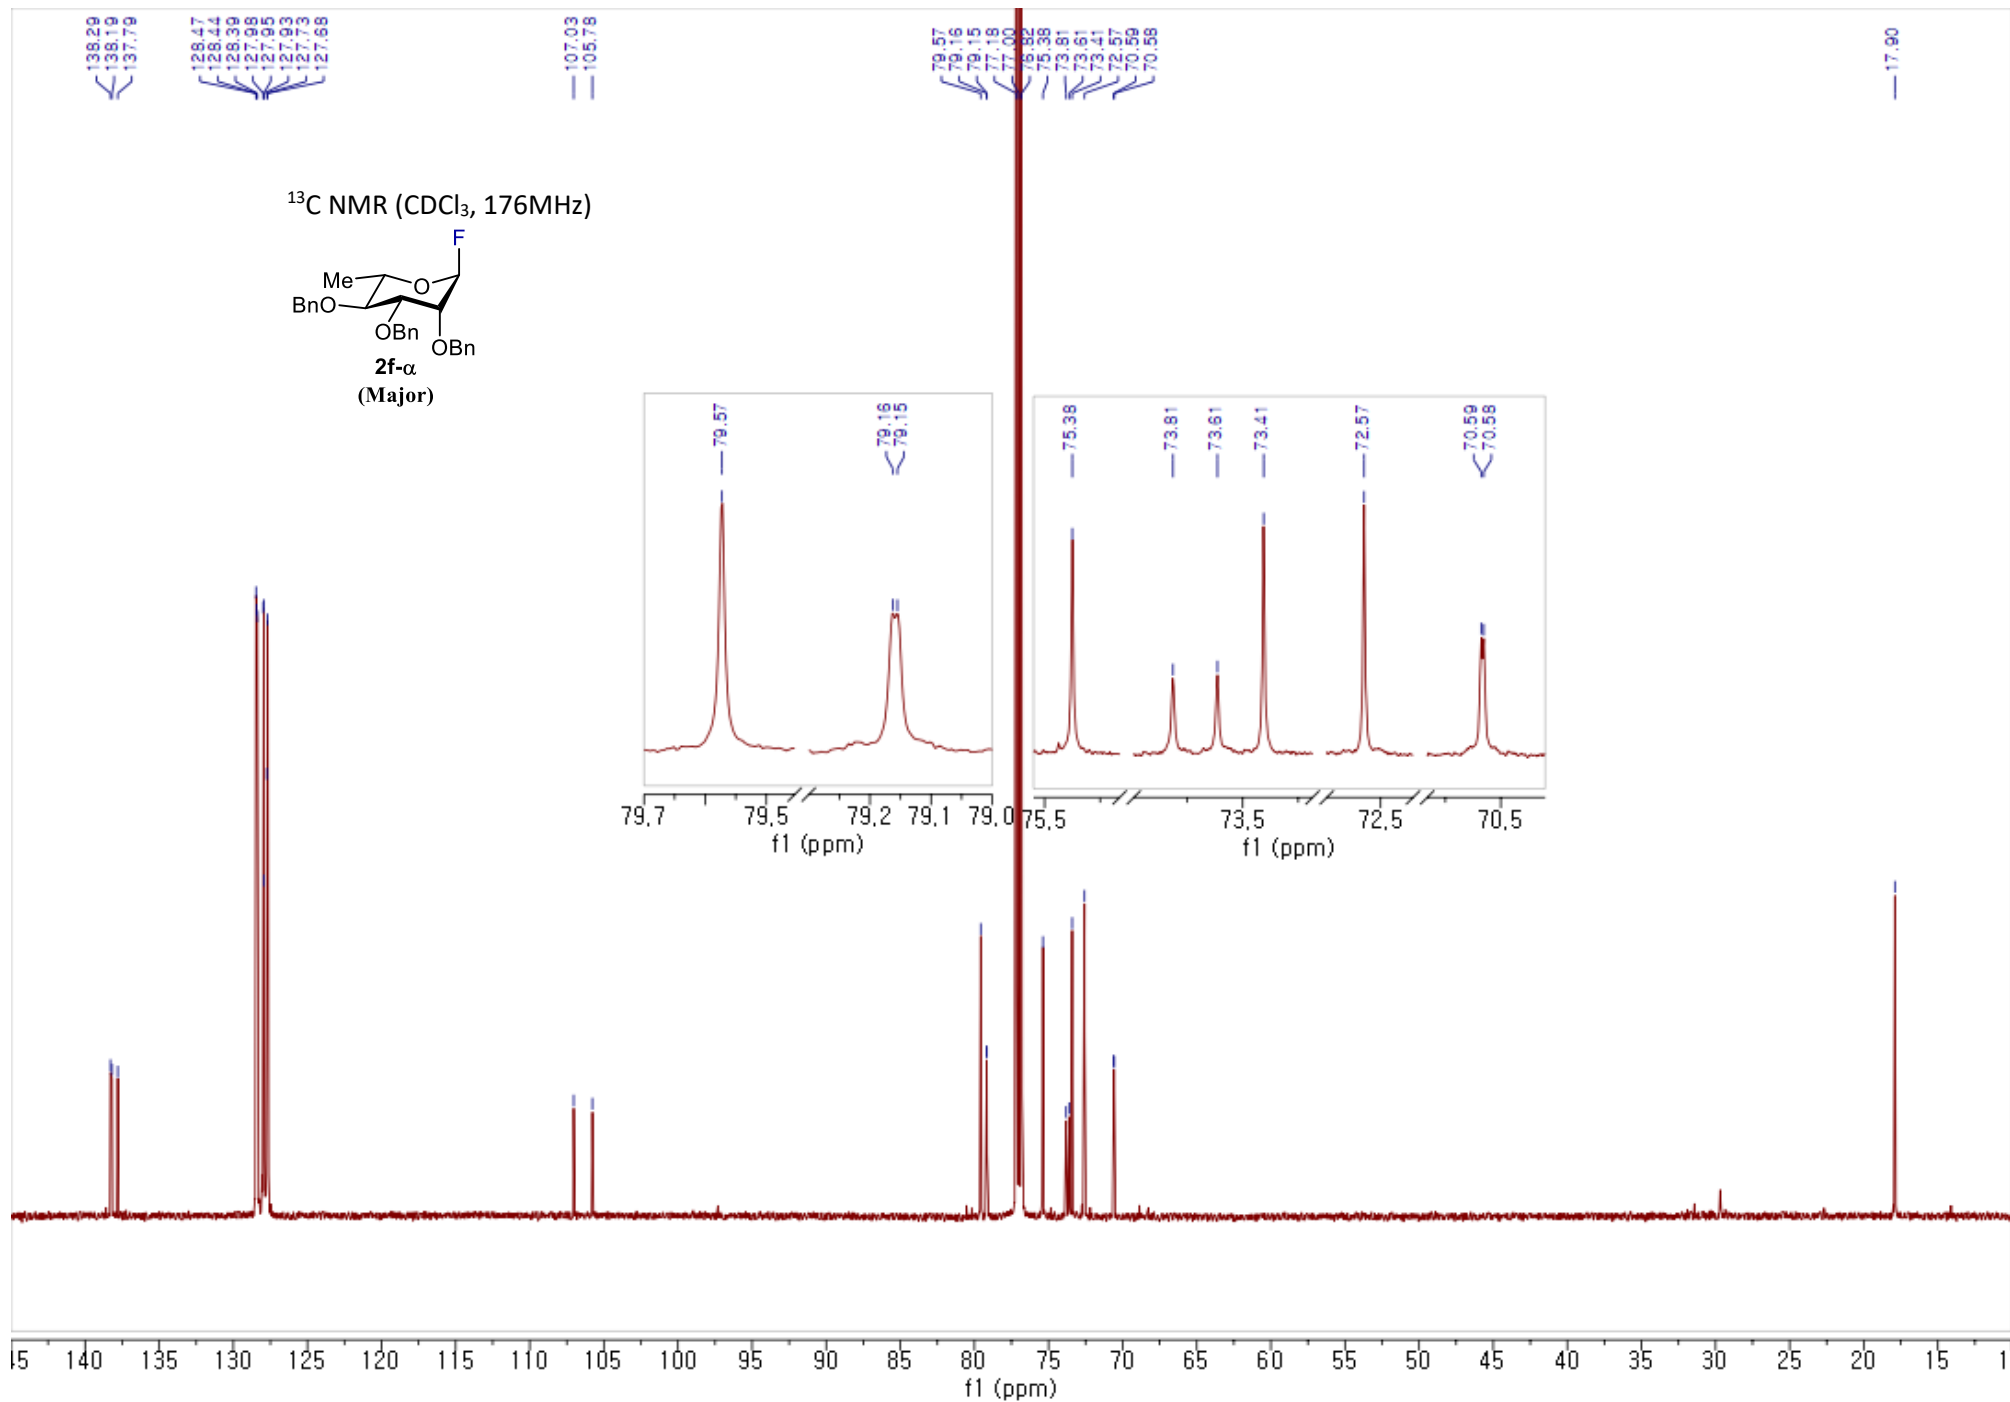

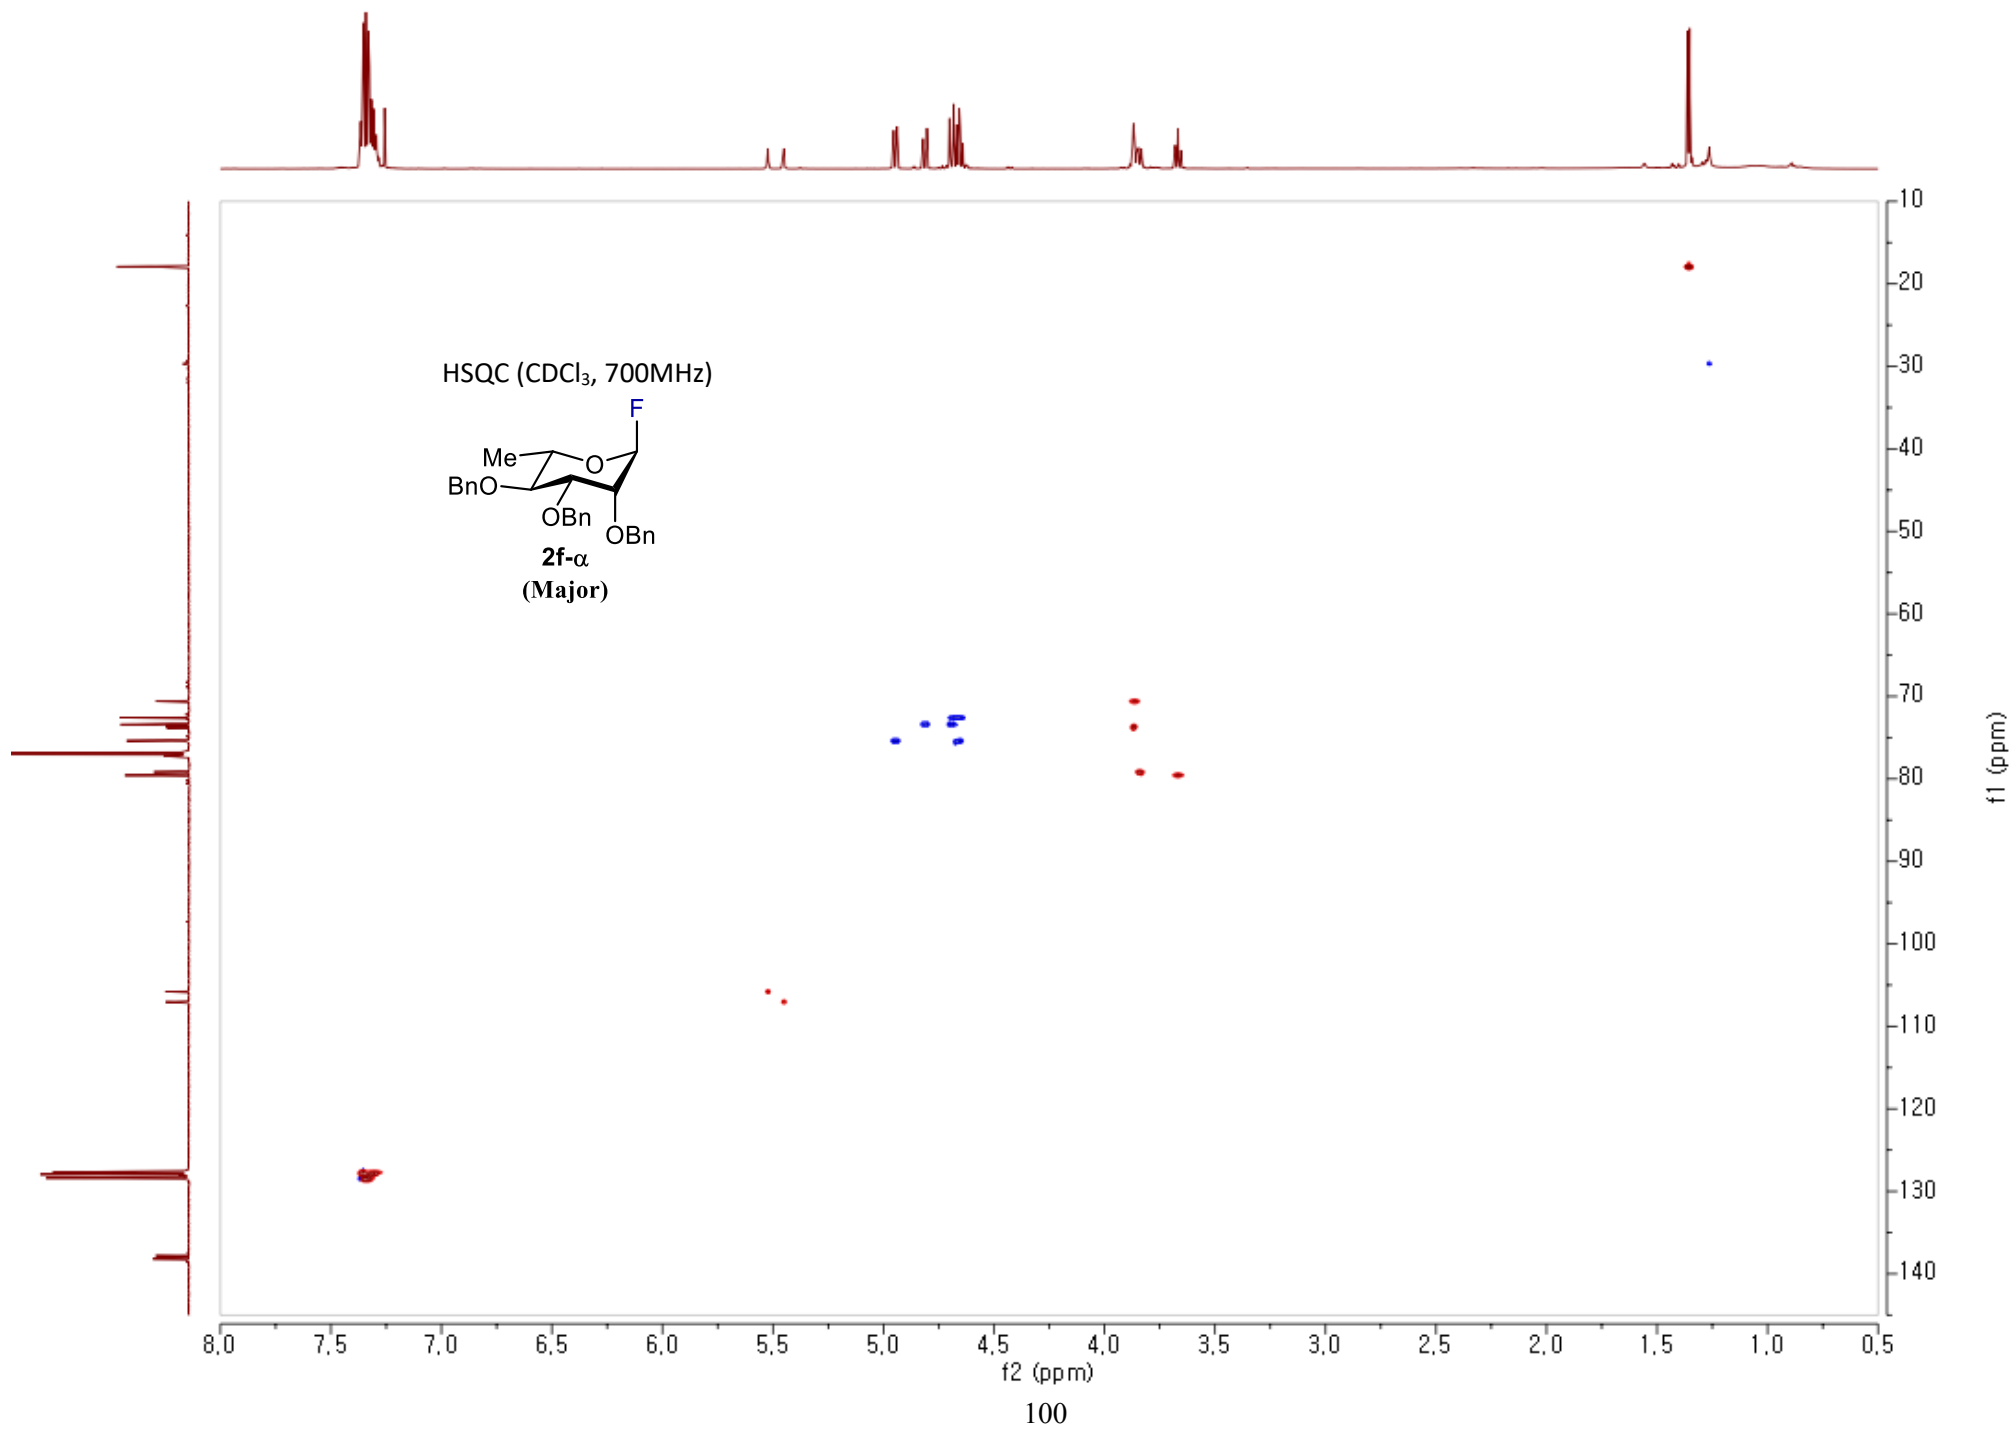



After Work-up  
<sup>19</sup>F NMR (CDCl<sub>3</sub>, 564 MHz)

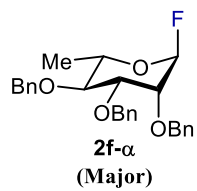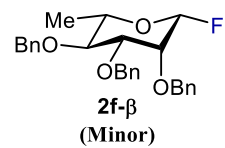

-137.02  
-137.11

-143.30  
-143.31  
-143.38  
-143.39

21.93

1.00

-135.5 -136.0 -136.5 -137.0 -137.5 -138.0 -138.5 -141.5 -142.0 -142.5 -143.0 -143.5 -144.0 -144.5 -14

f1 (ppm)

After Purification  
<sup>19</sup>F NMR (CDCl<sub>3</sub>, 564 MHz)

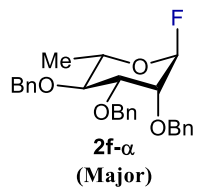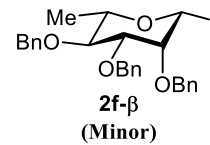

136.99  
137.08

142.95  
143.05  
143.15  
143.25

18.40

1.00

-135.5 -136.0 -136.5 -137.0 -137.5 -138.0 -138.5 -142.0 -142.5 -143.0 -143.5 -144.0 -144.5 -14

f1 (ppm)

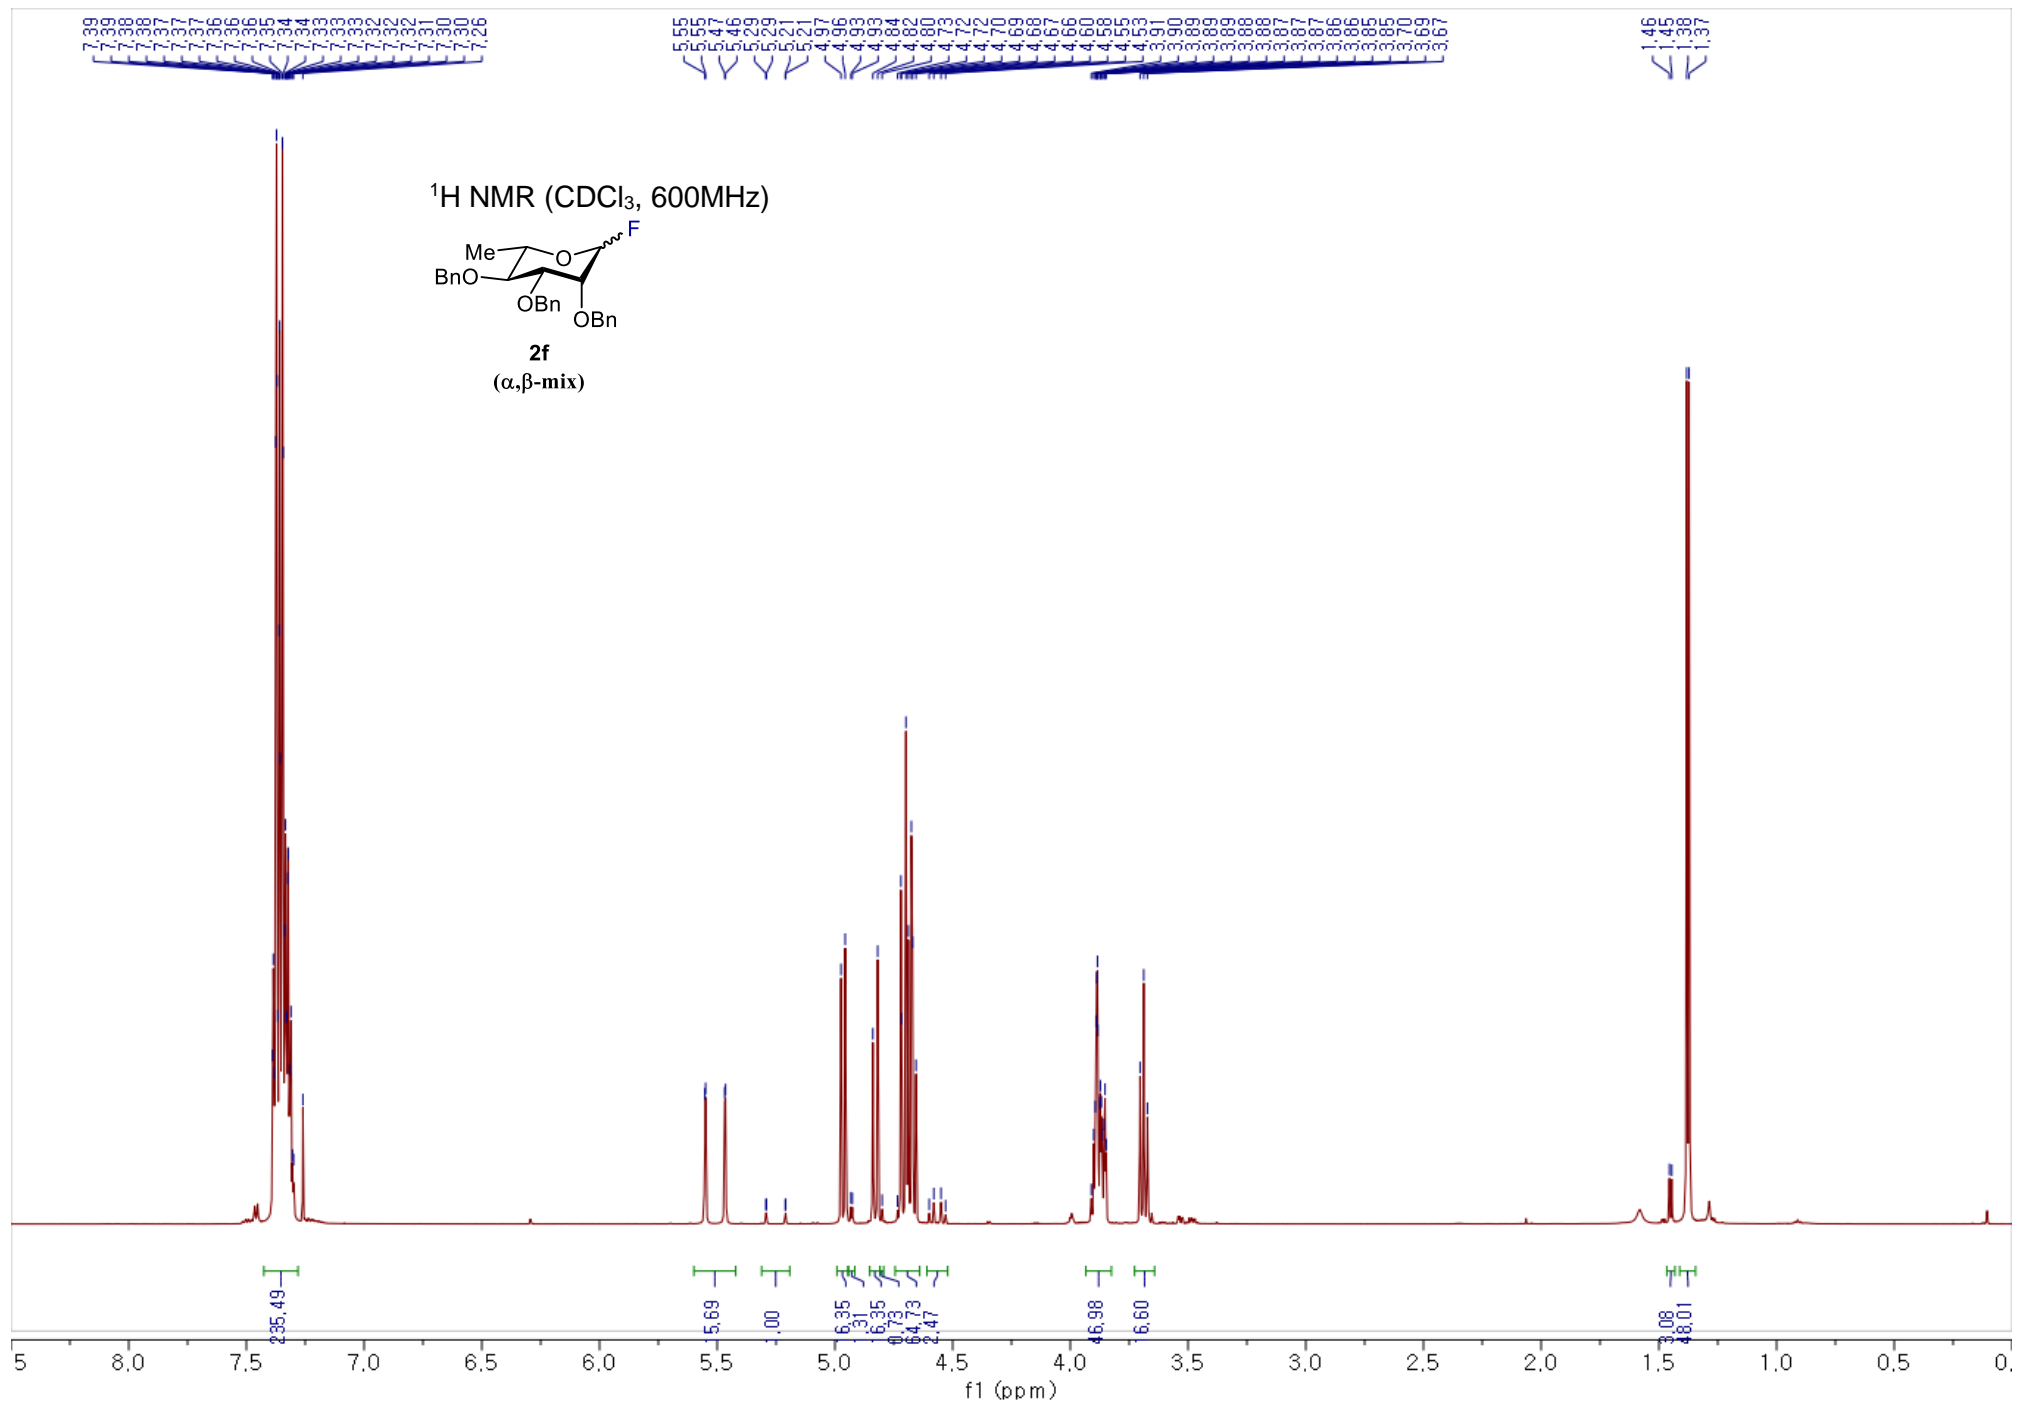

# 2,3,5-Tris-O-(phenylmethyl)- $\beta$ -D-ribofuranosyl fluoride (2g- $\beta$ , Major diastereomer)

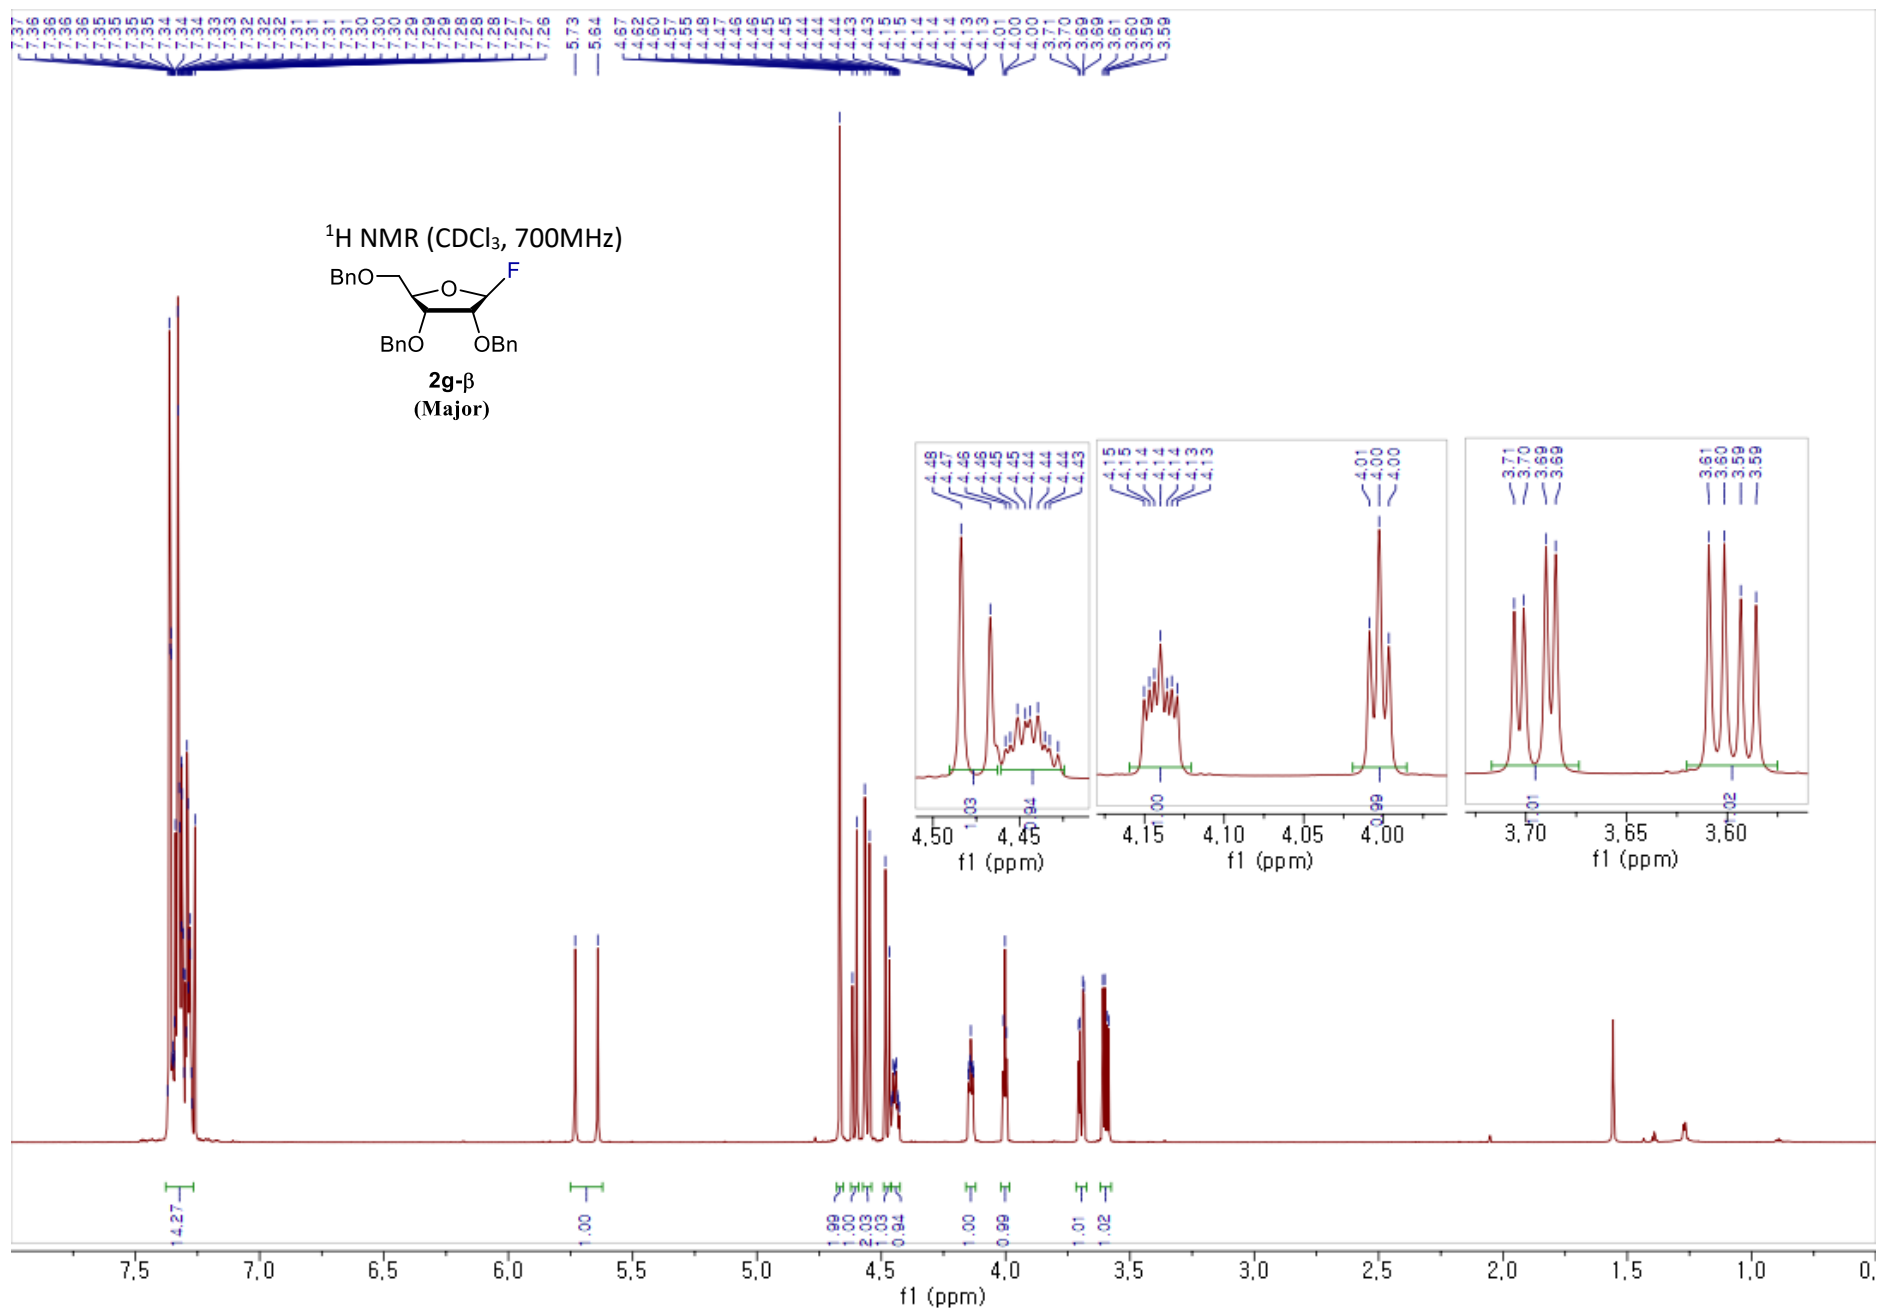

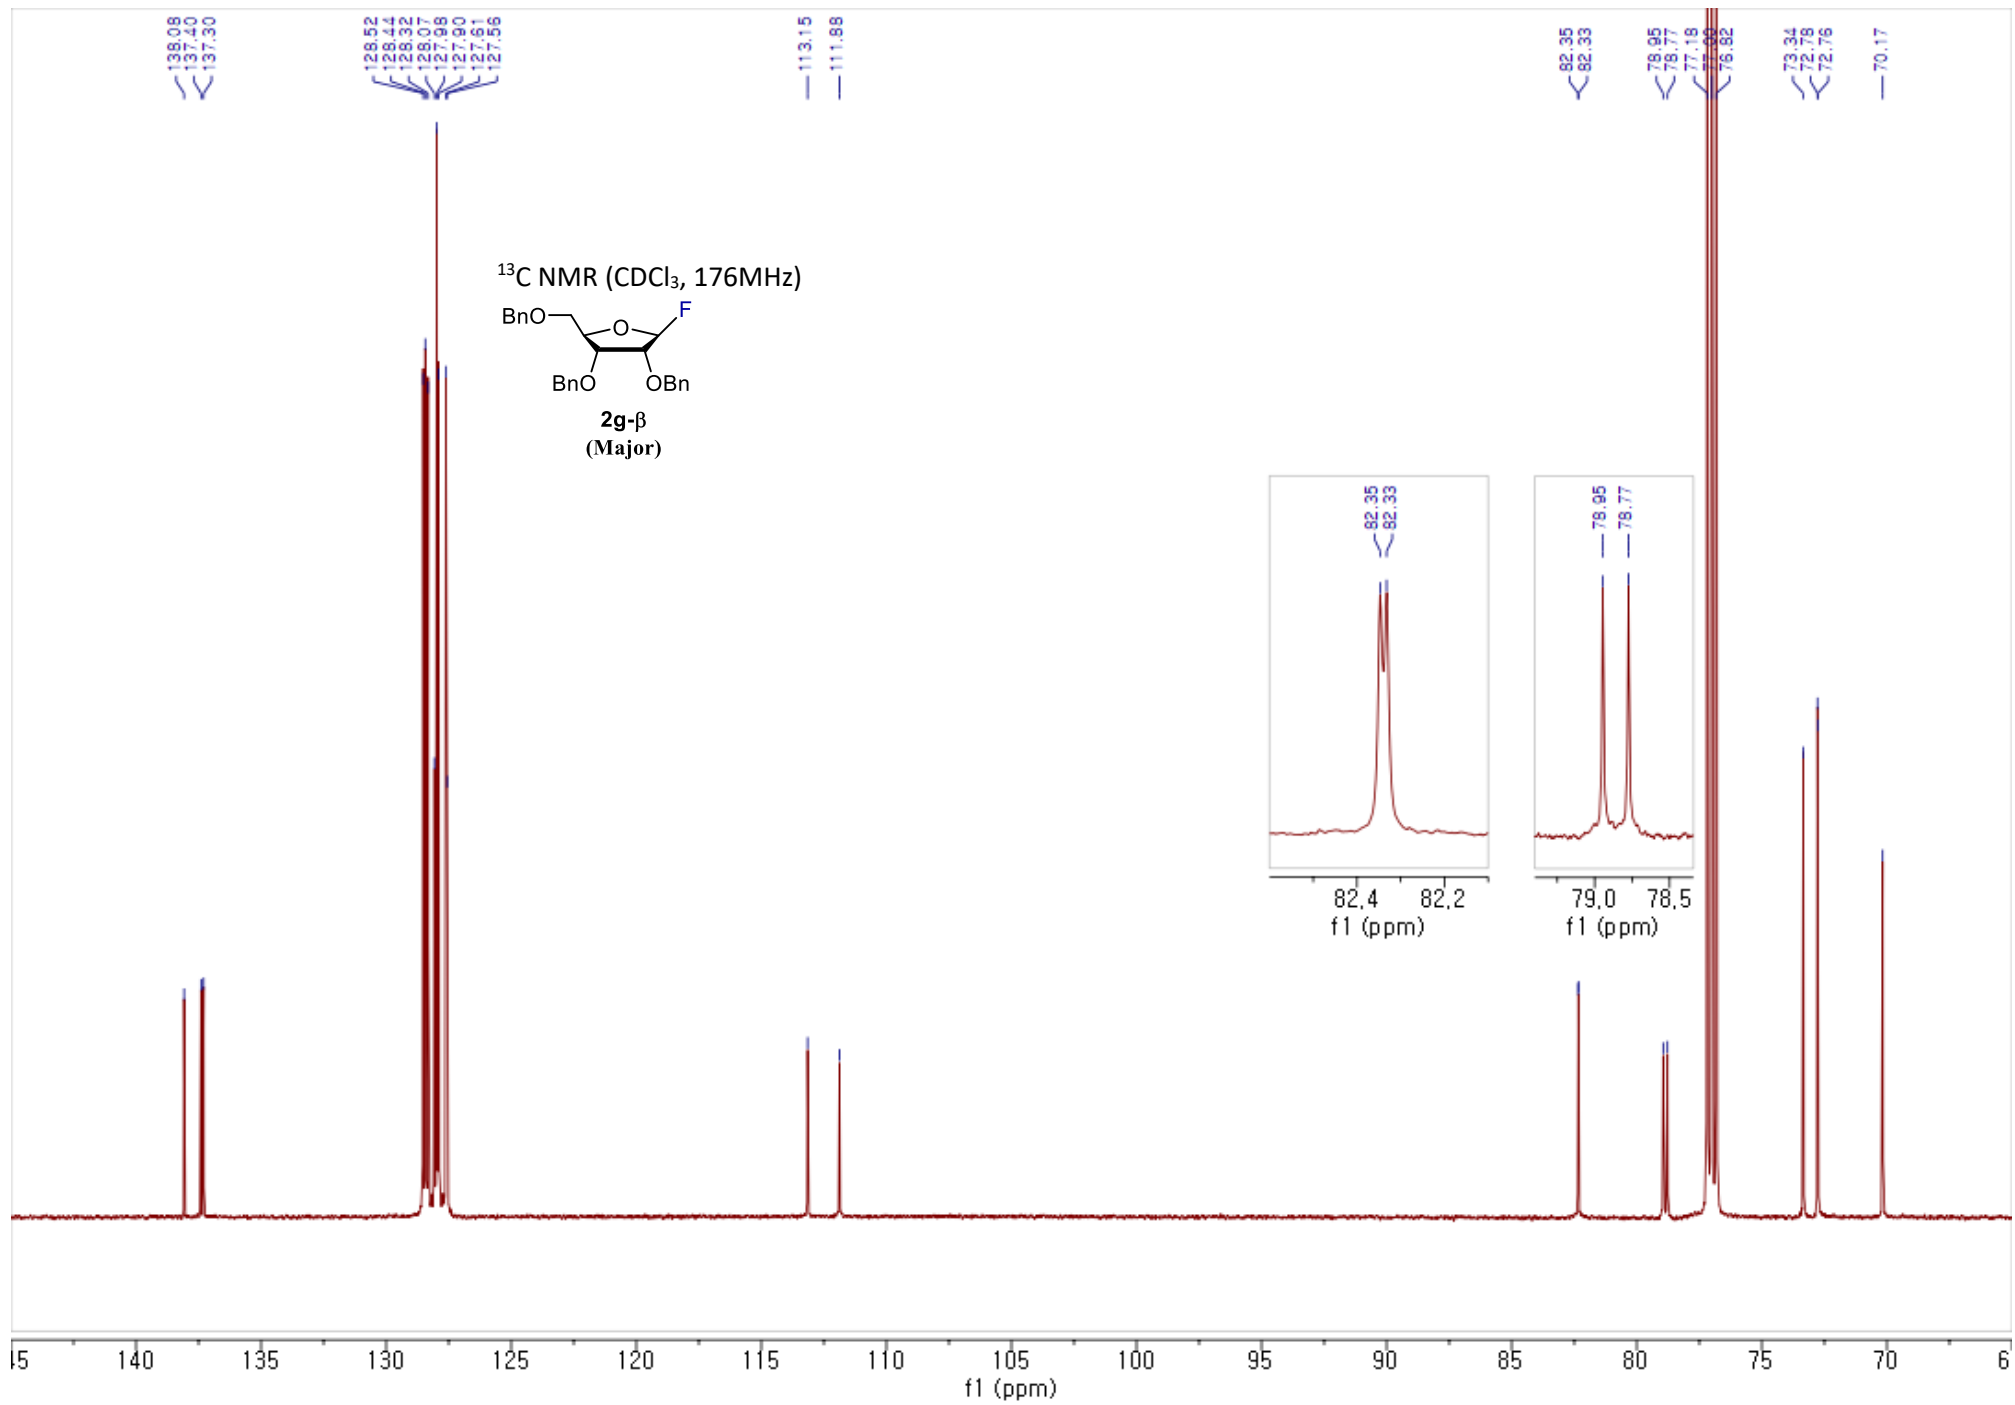

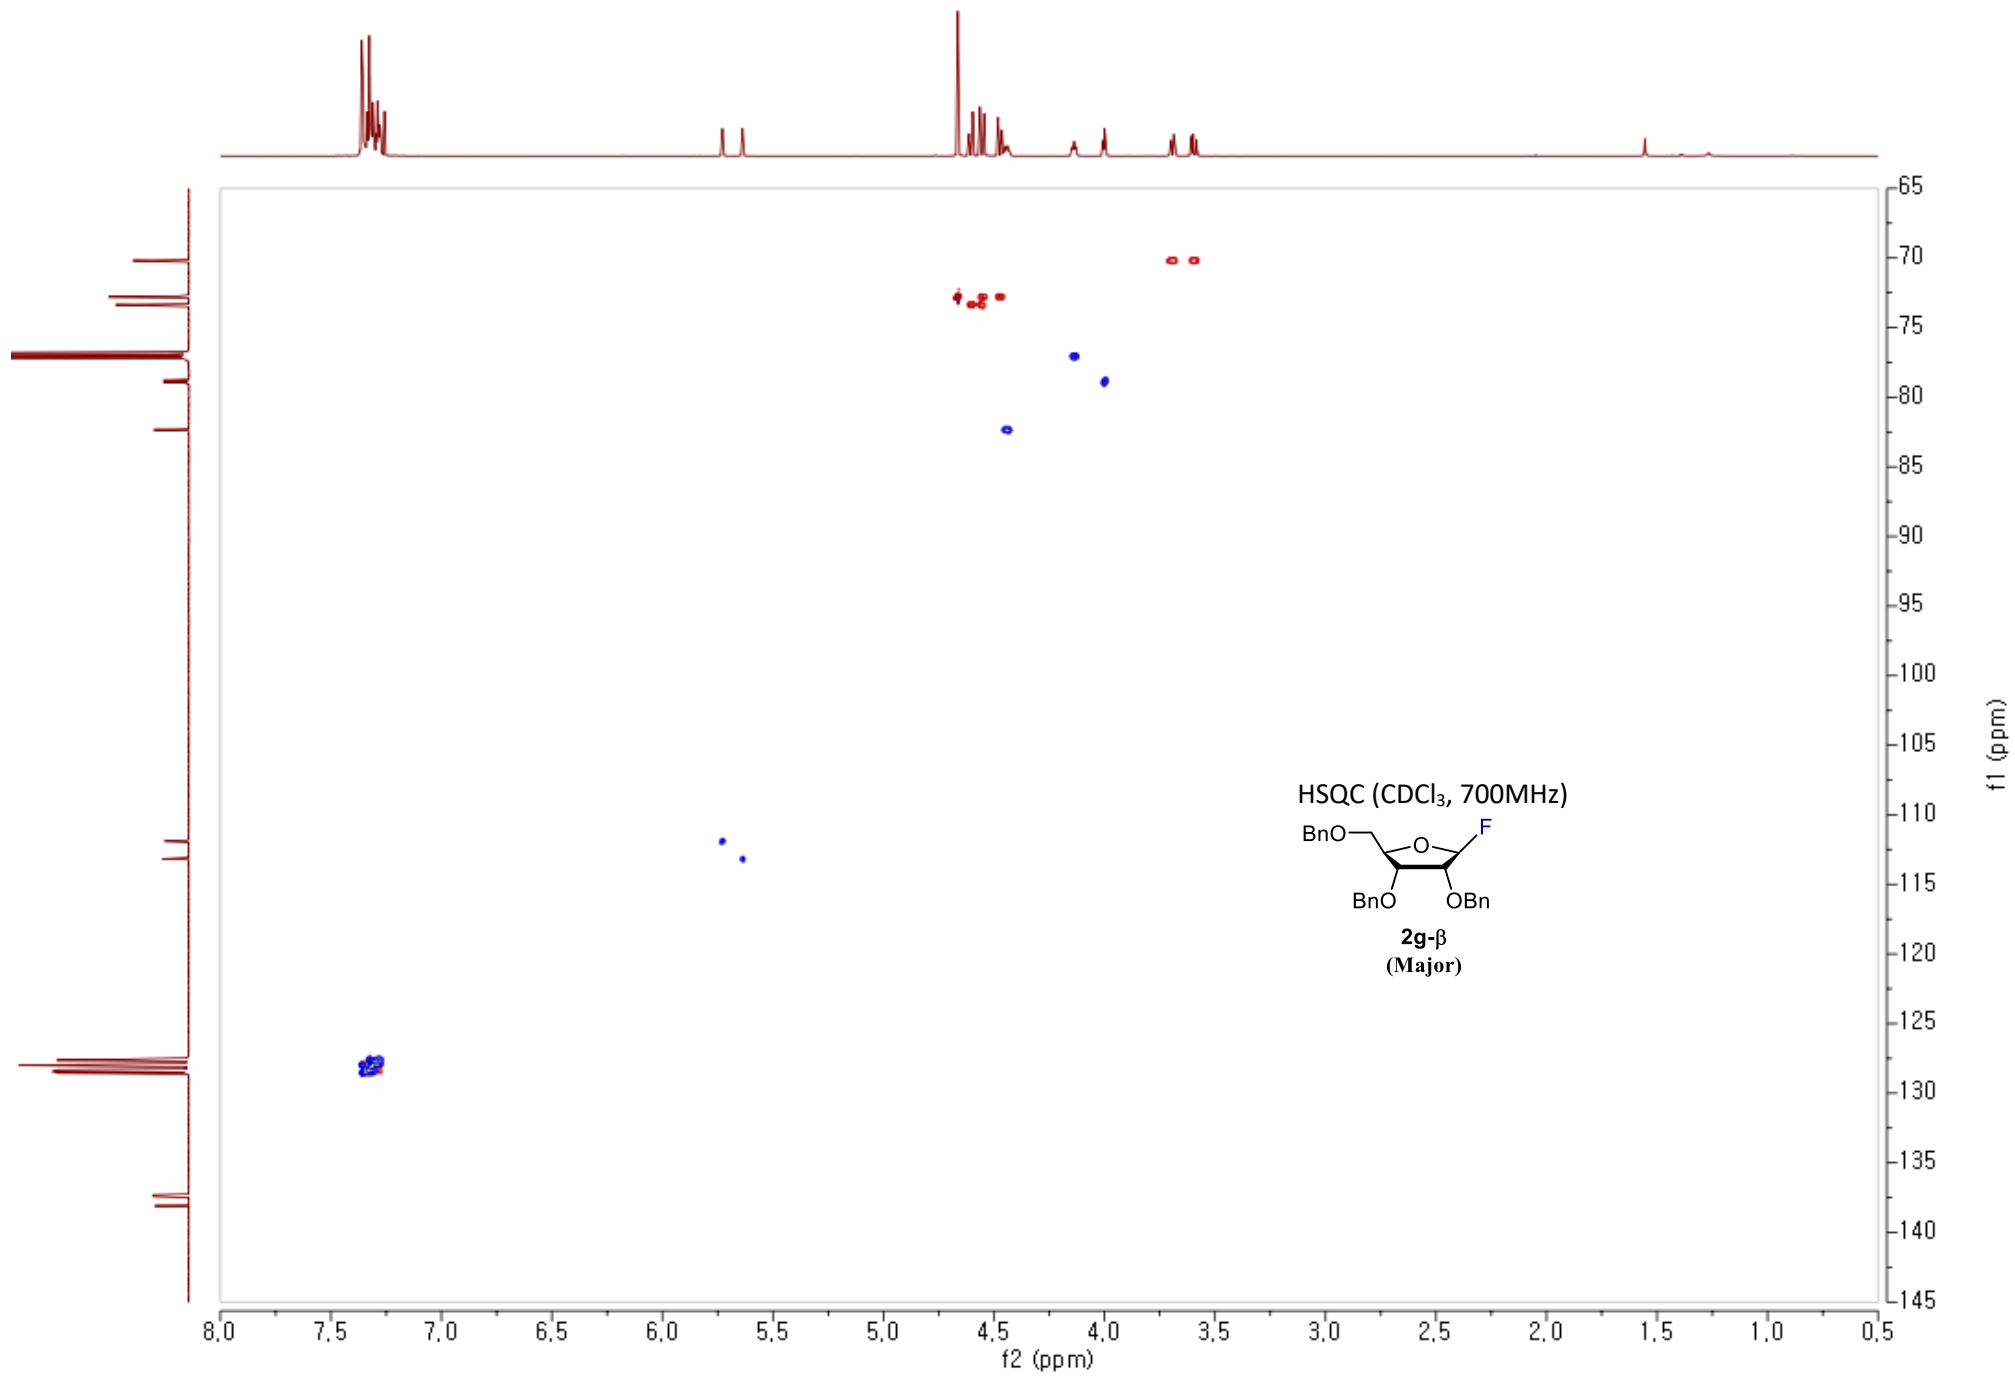

After Work-up  
<sup>19</sup>F NMR (CDCl<sub>3</sub>, 564 MHz)

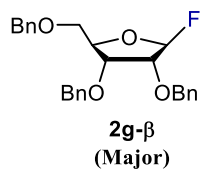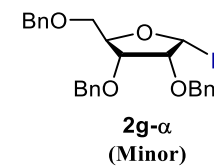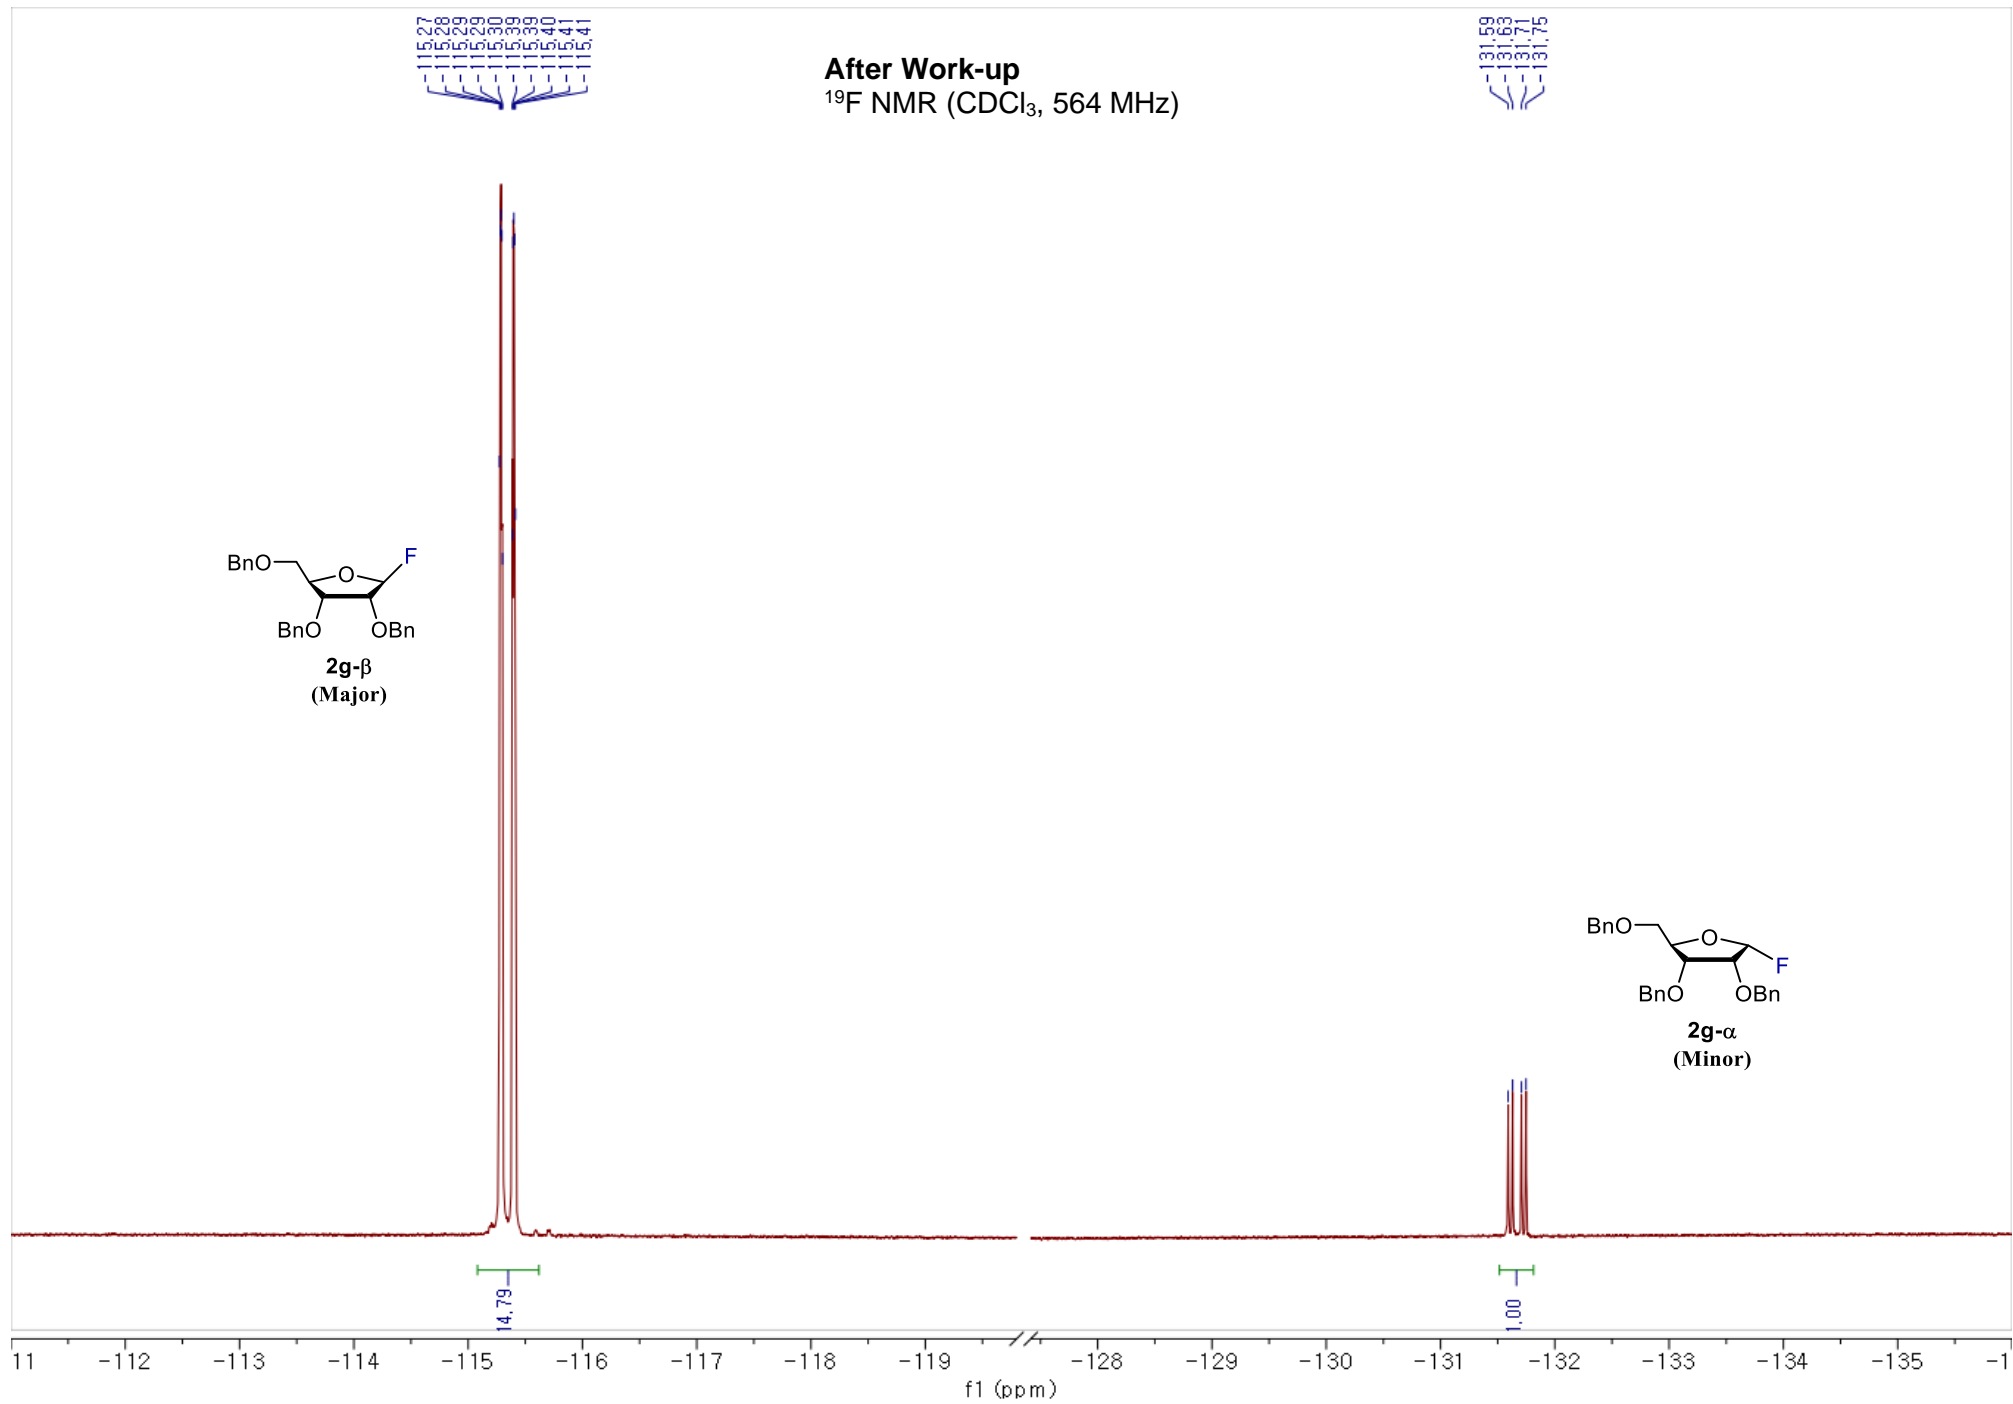





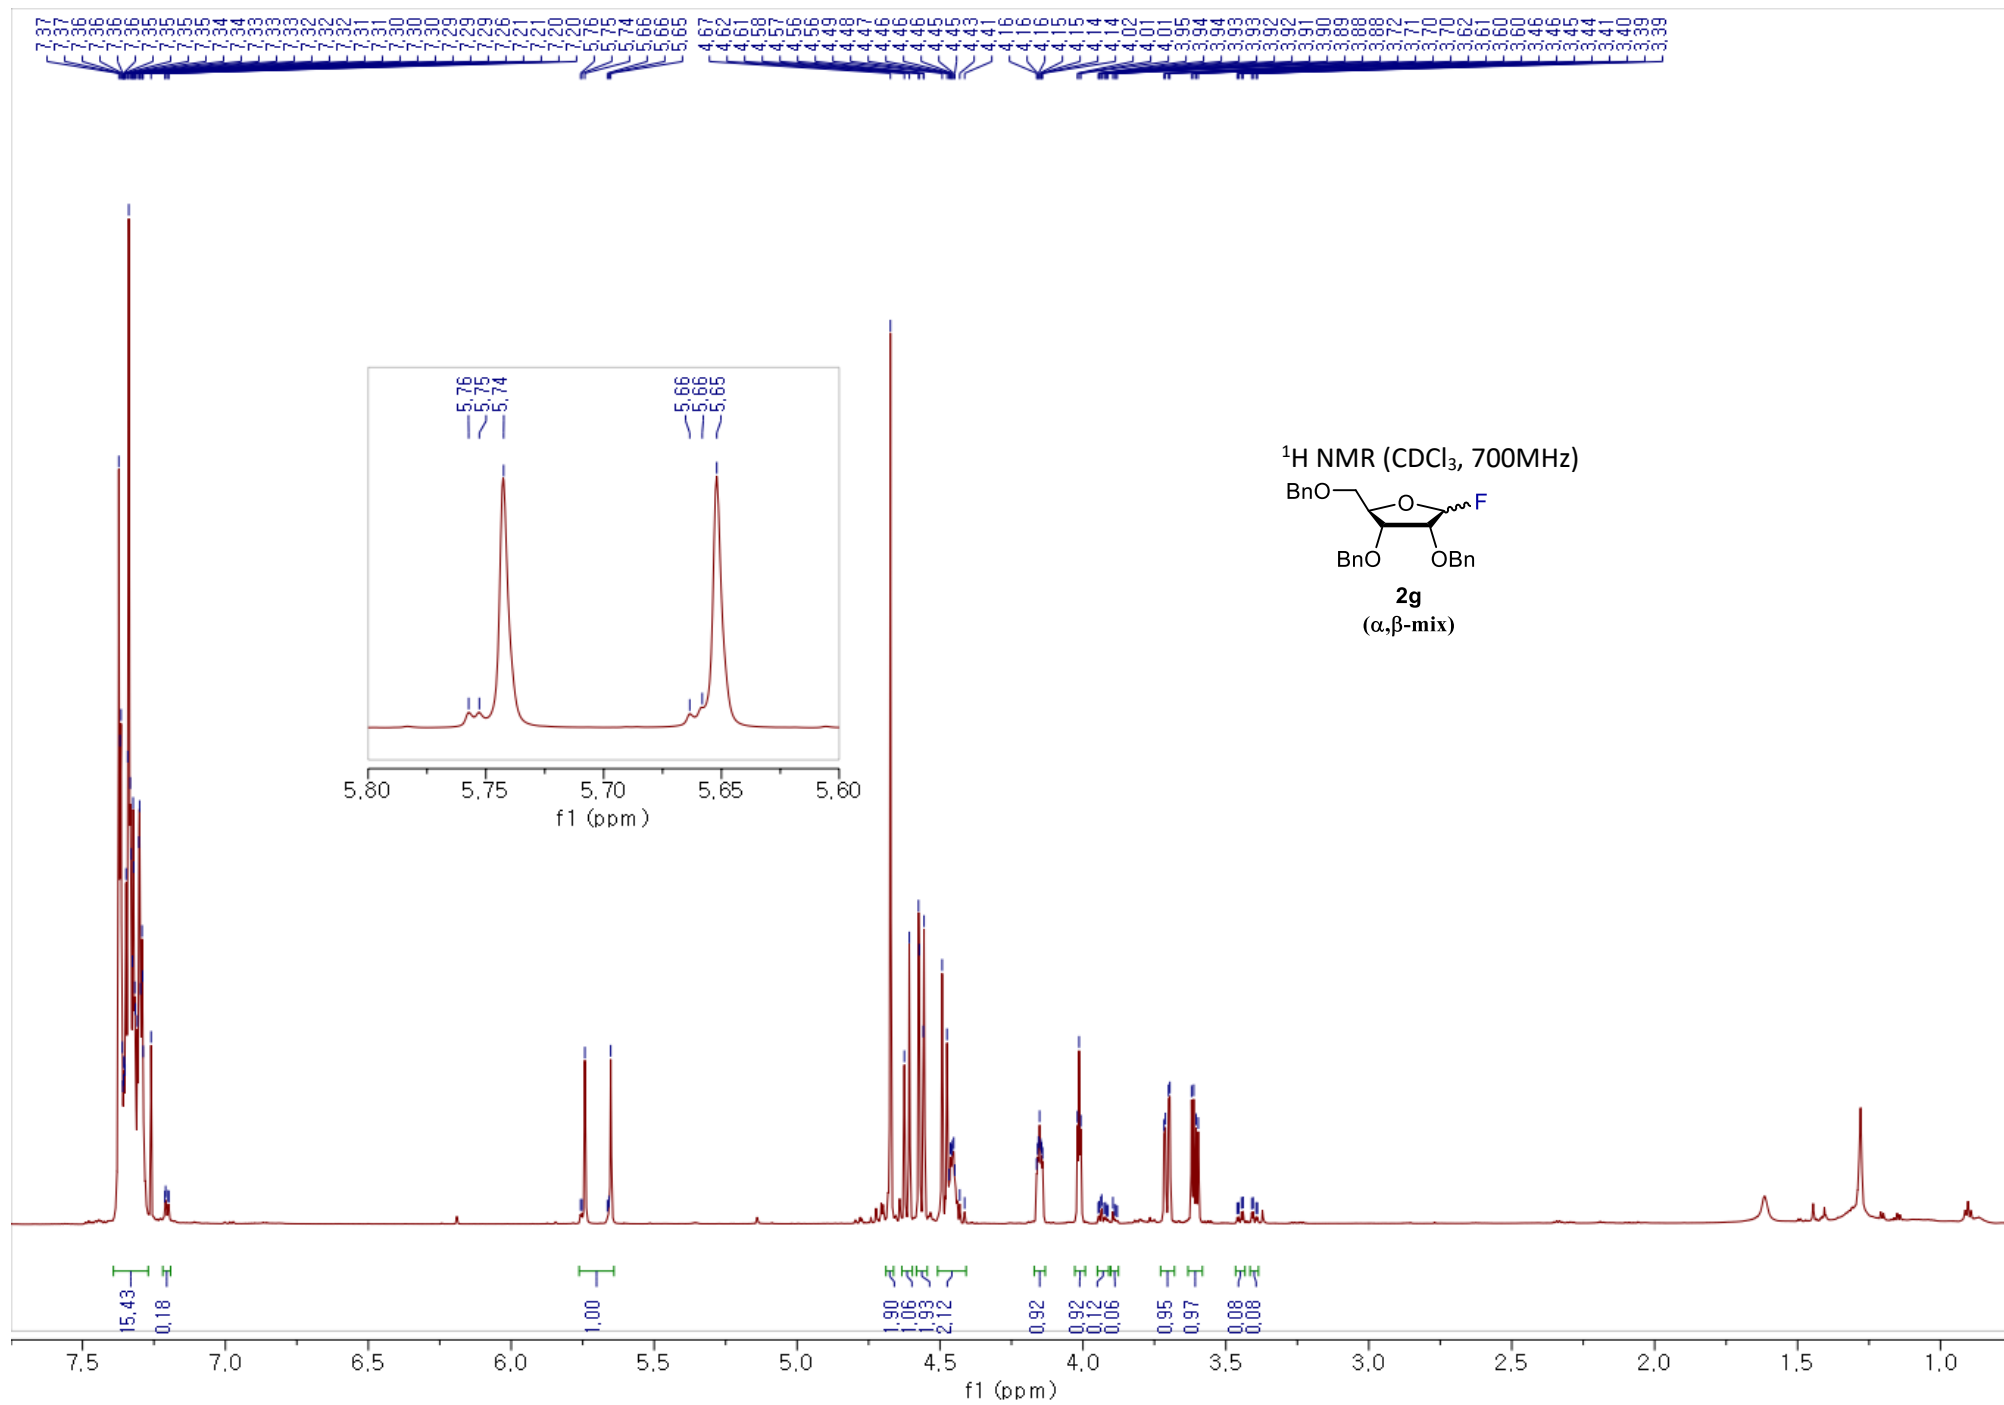

2,3,4,6-Tetrakis-O-[(4-methoxyphenyl)methyl]-β-D-galactopyranosyl fluoride (2h-β, Major diastereomer)

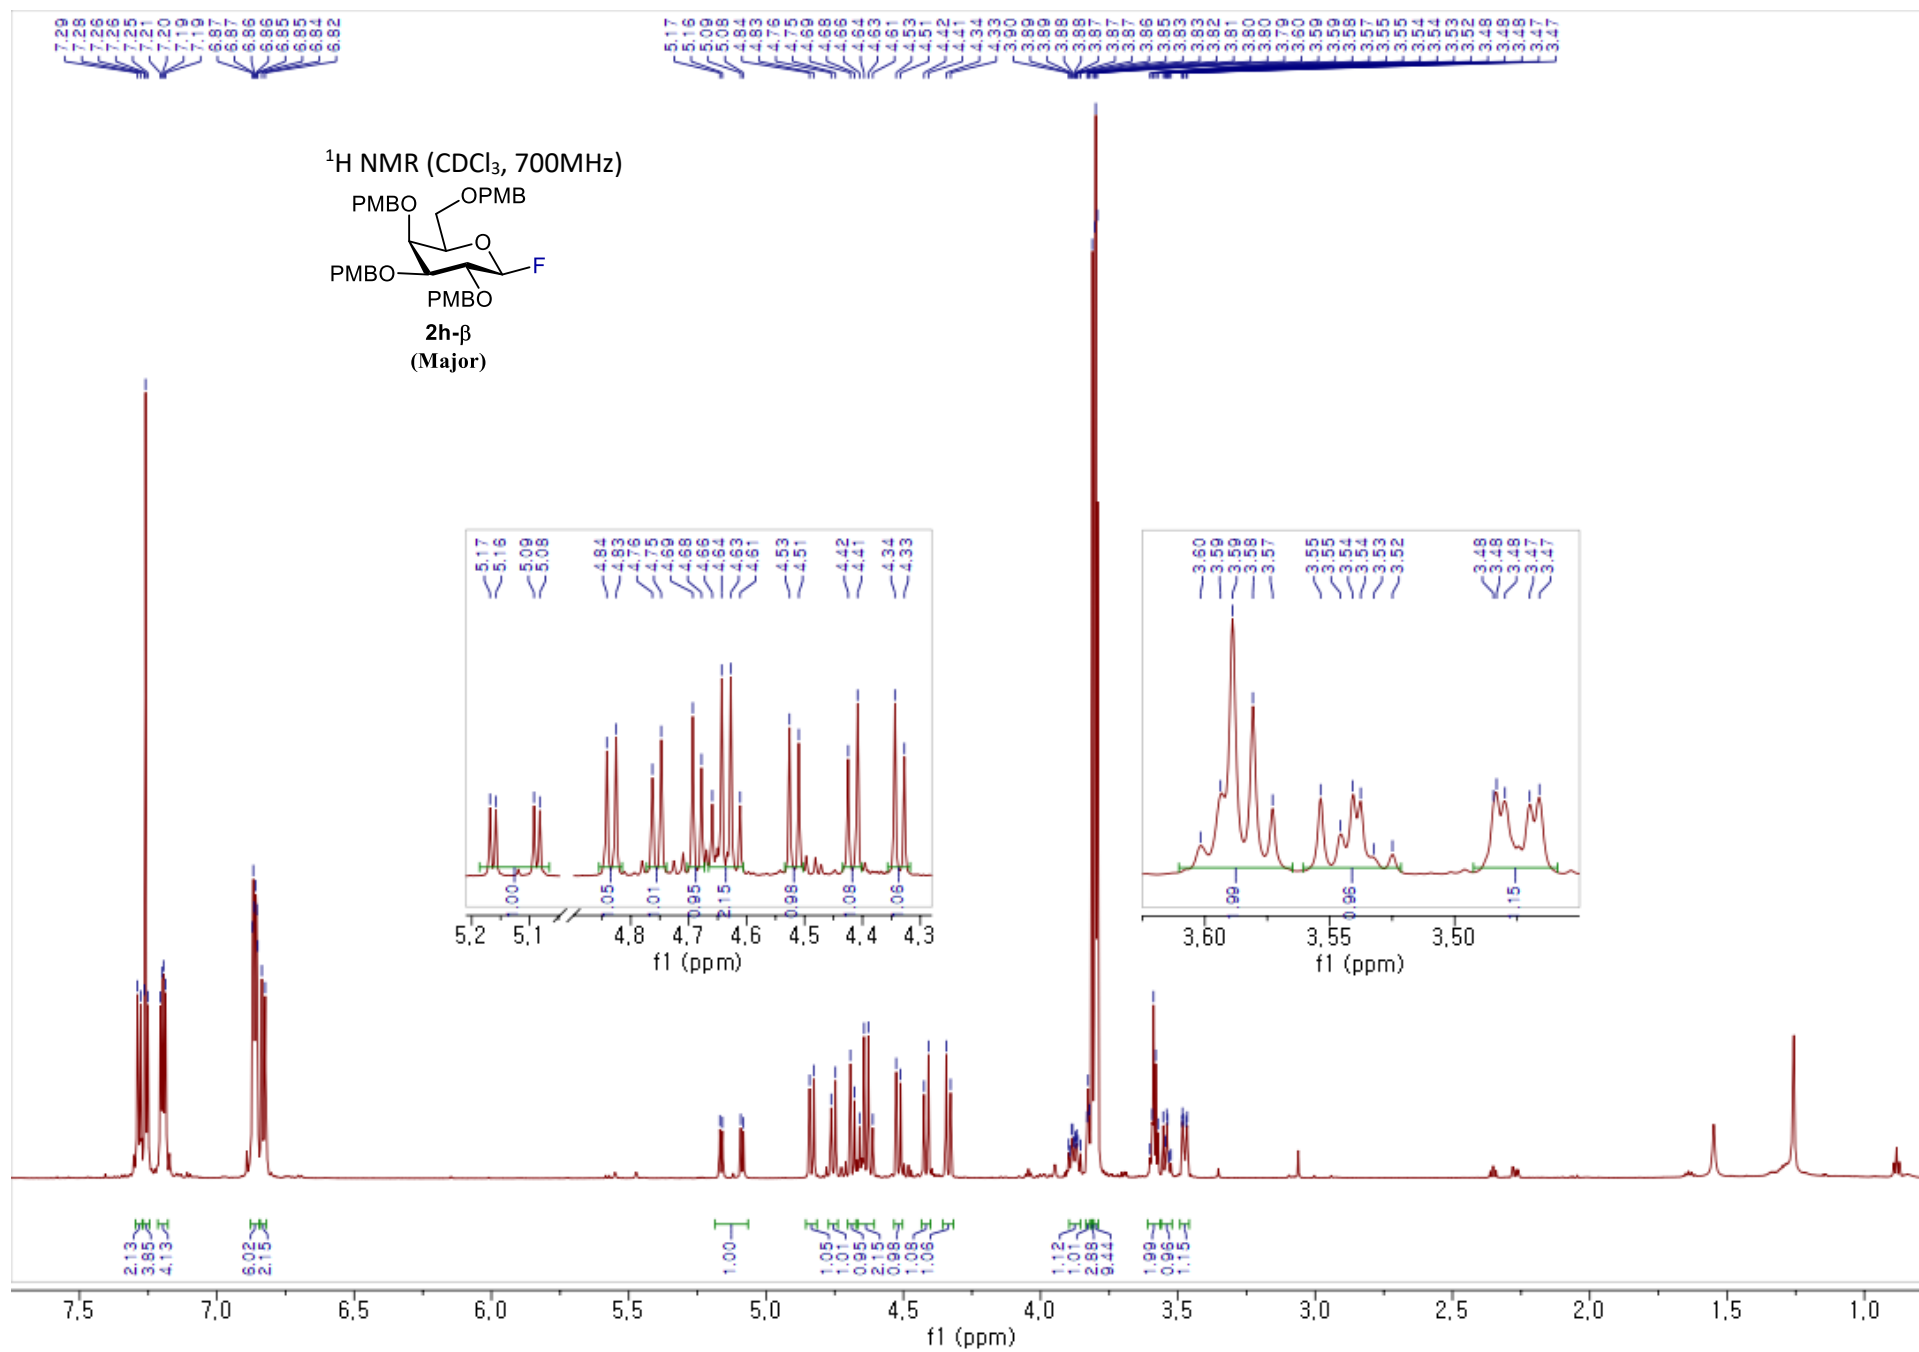

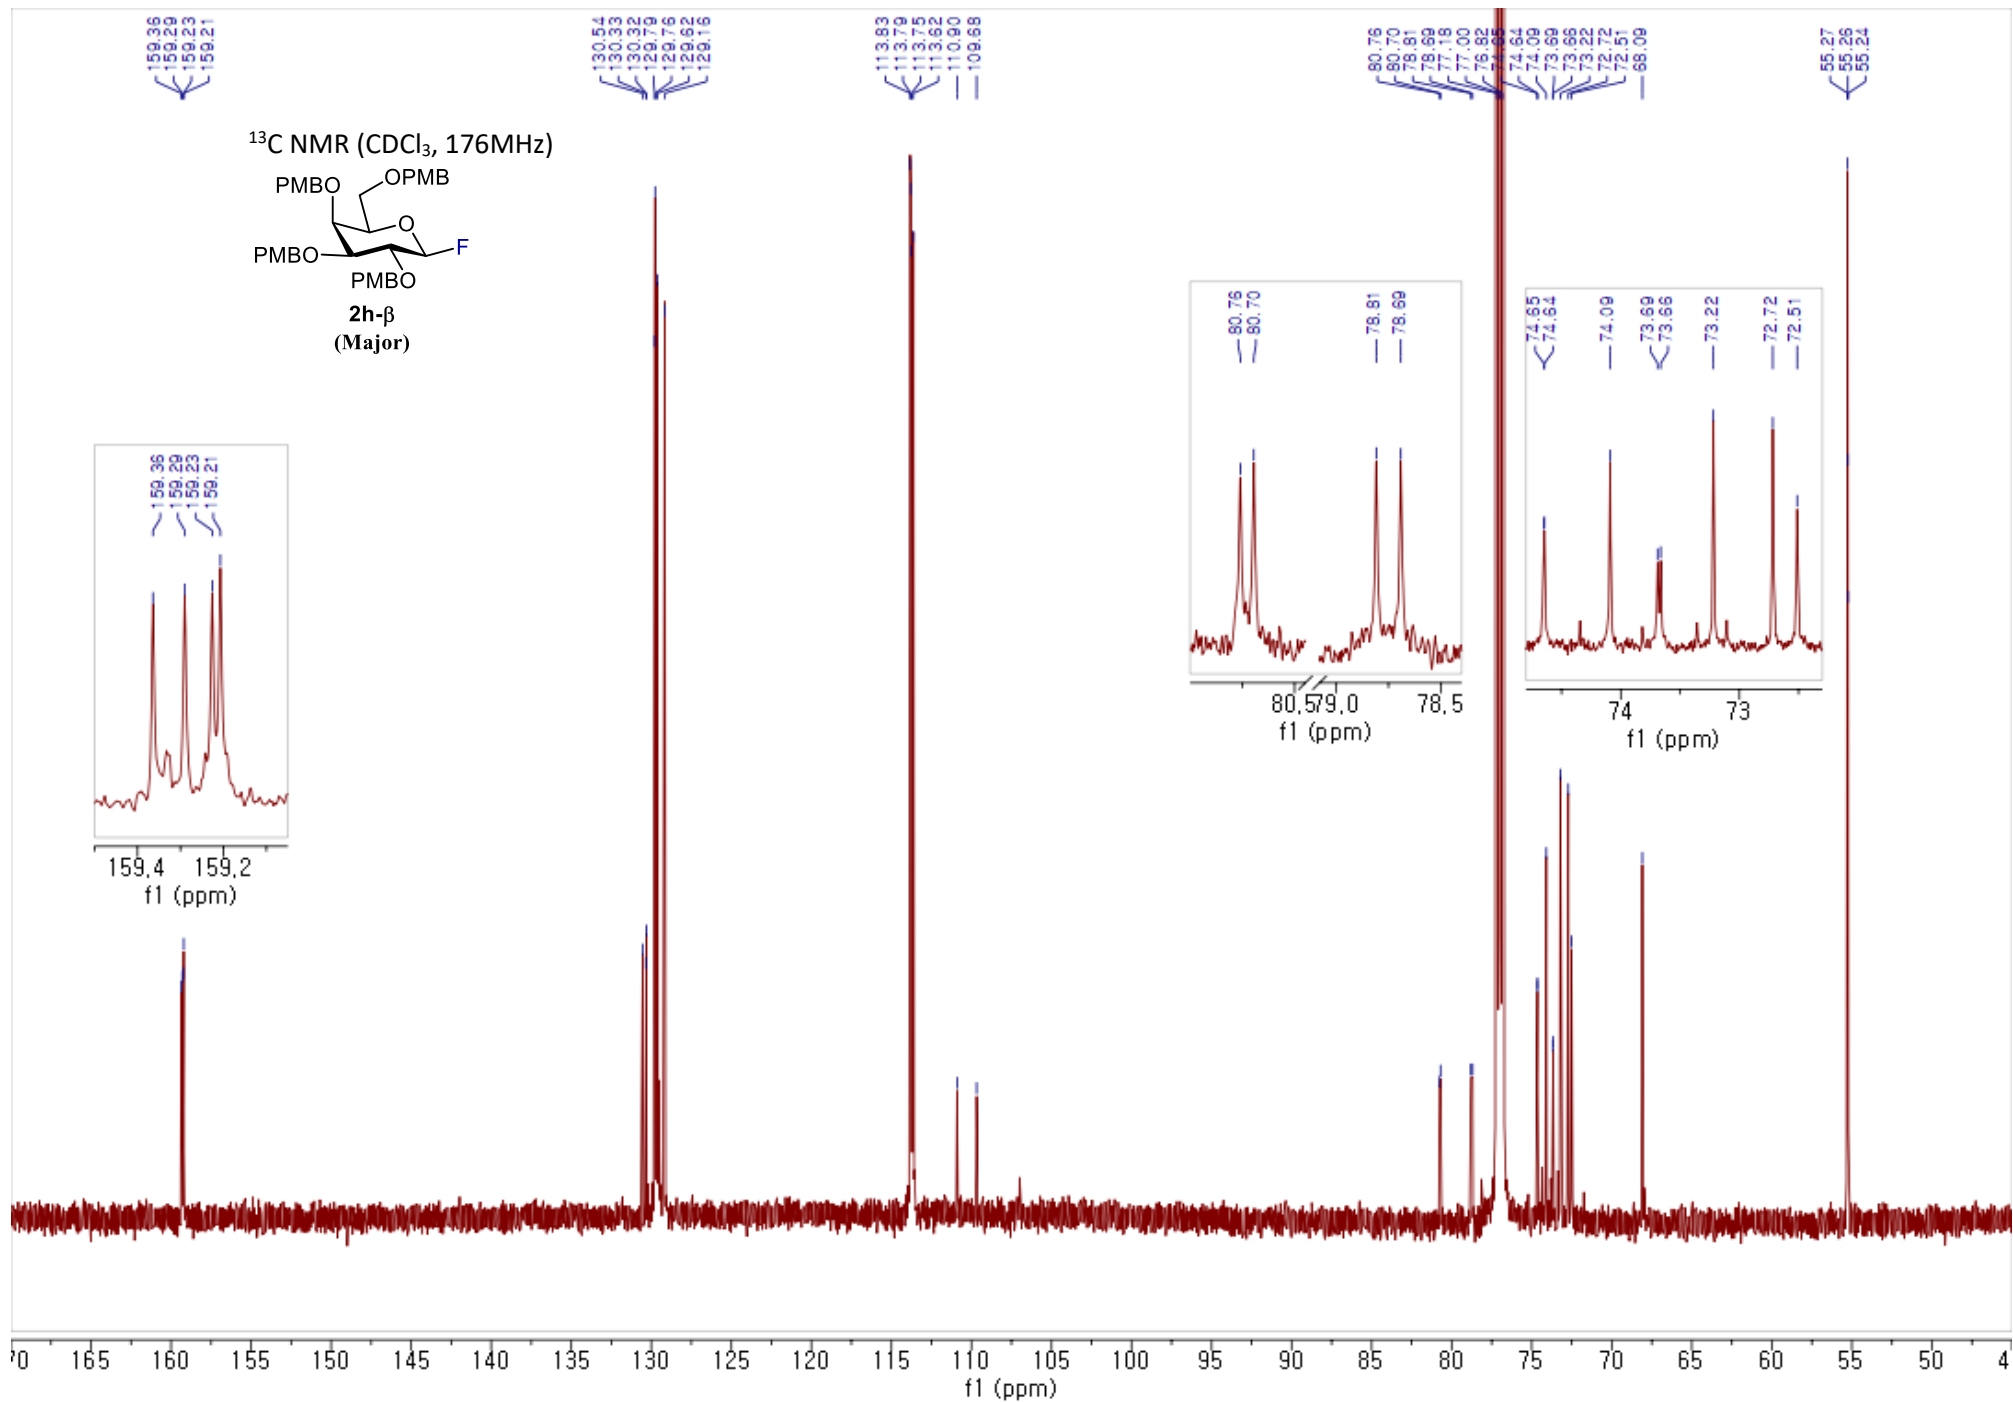

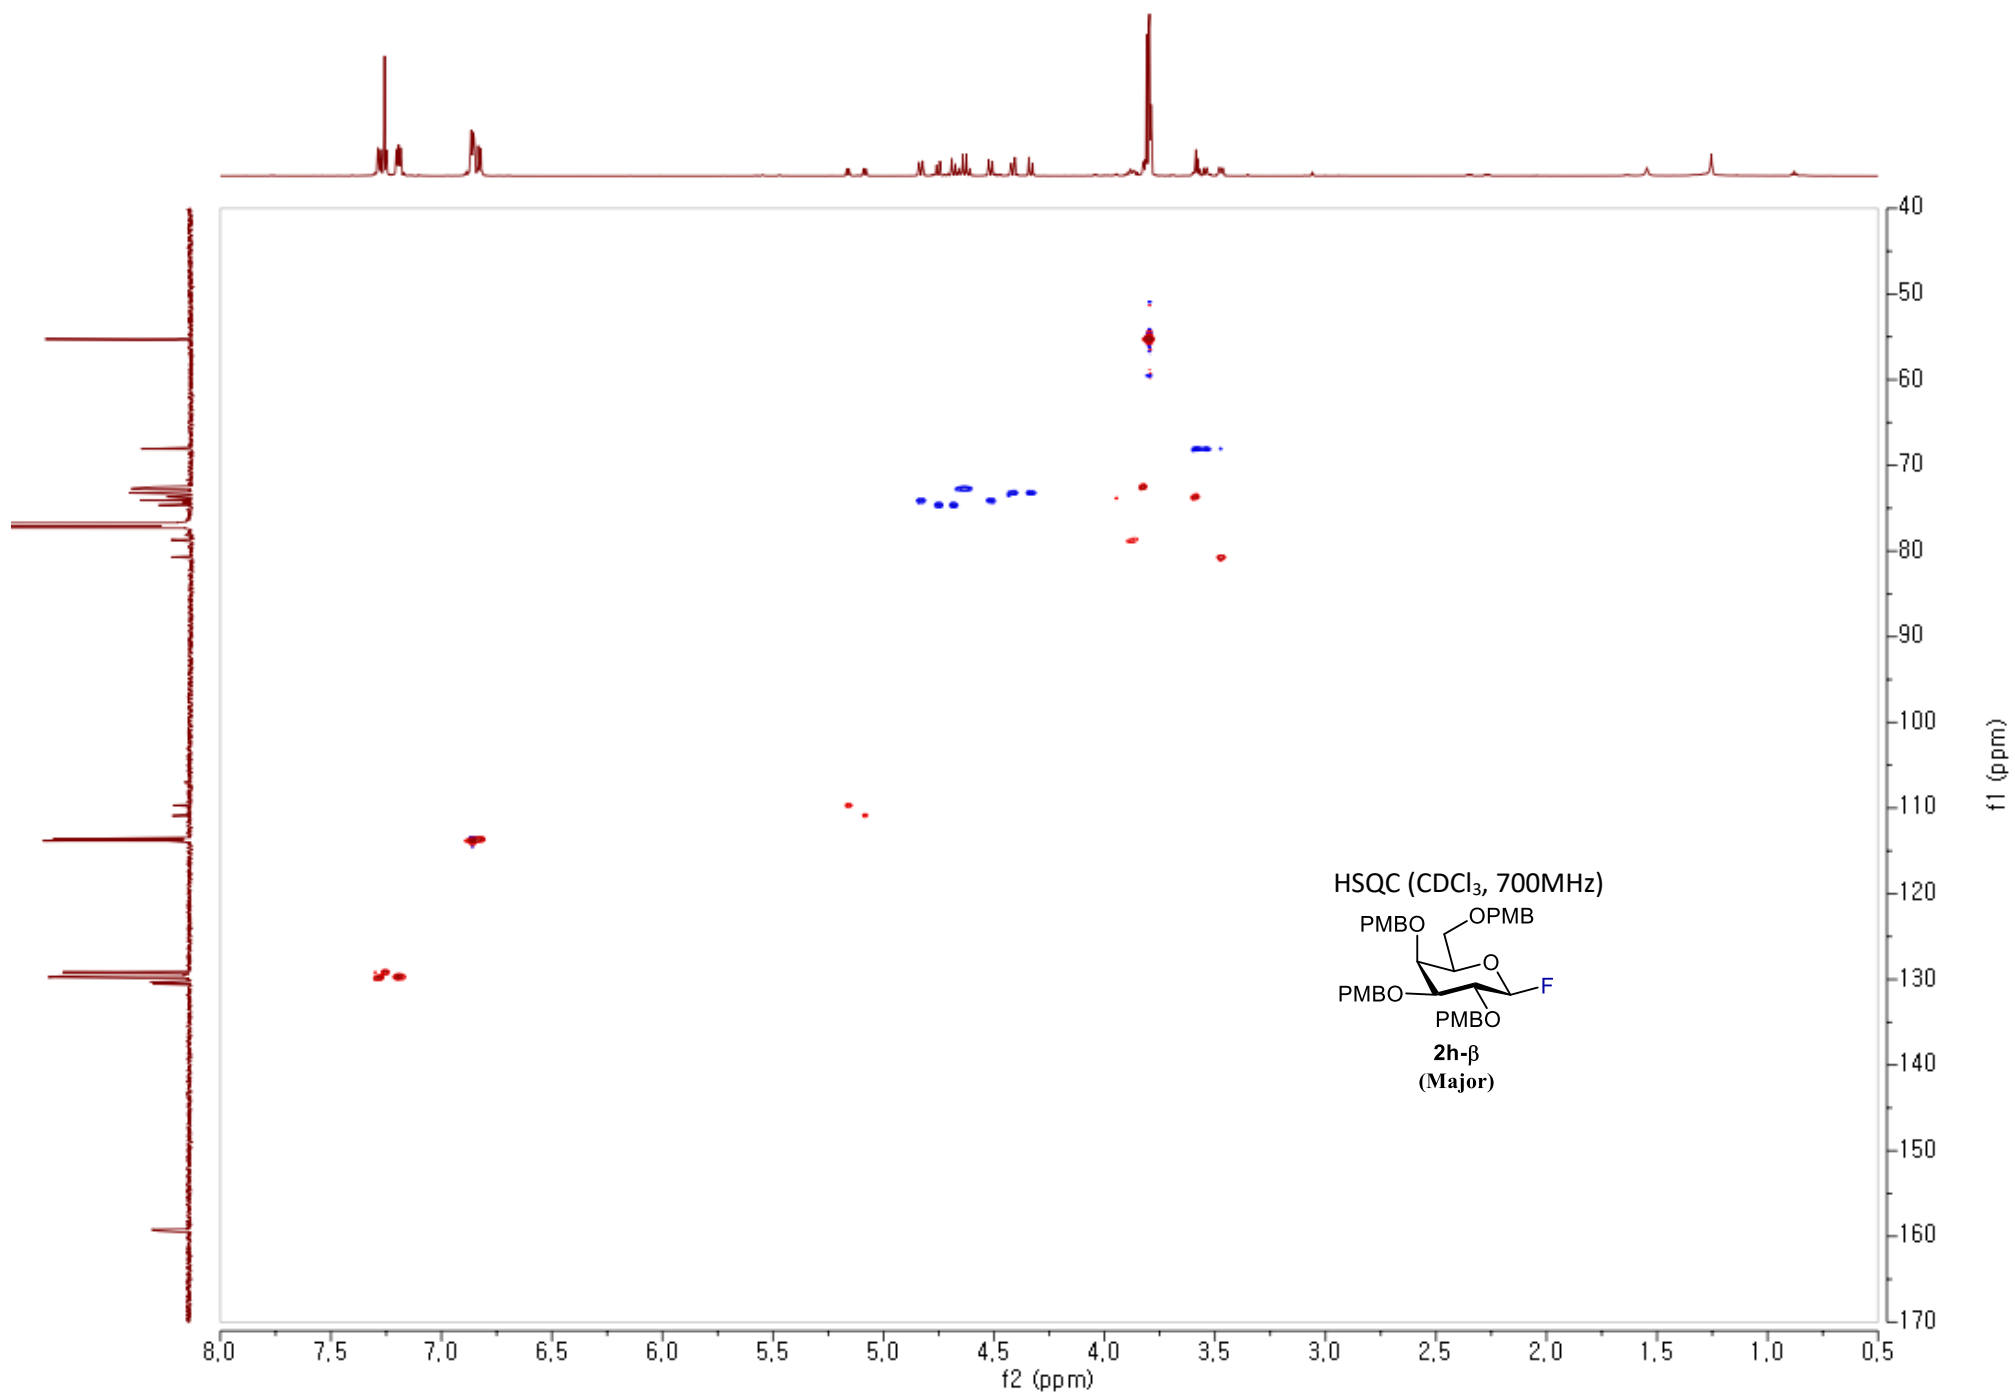

2,3,4,6-Tetrakis-O-[(4-methoxyphenyl)methyl]- $\alpha$ -D-galactopyranosyl fluoride (2h- $\alpha$ , Minor diastereomer)

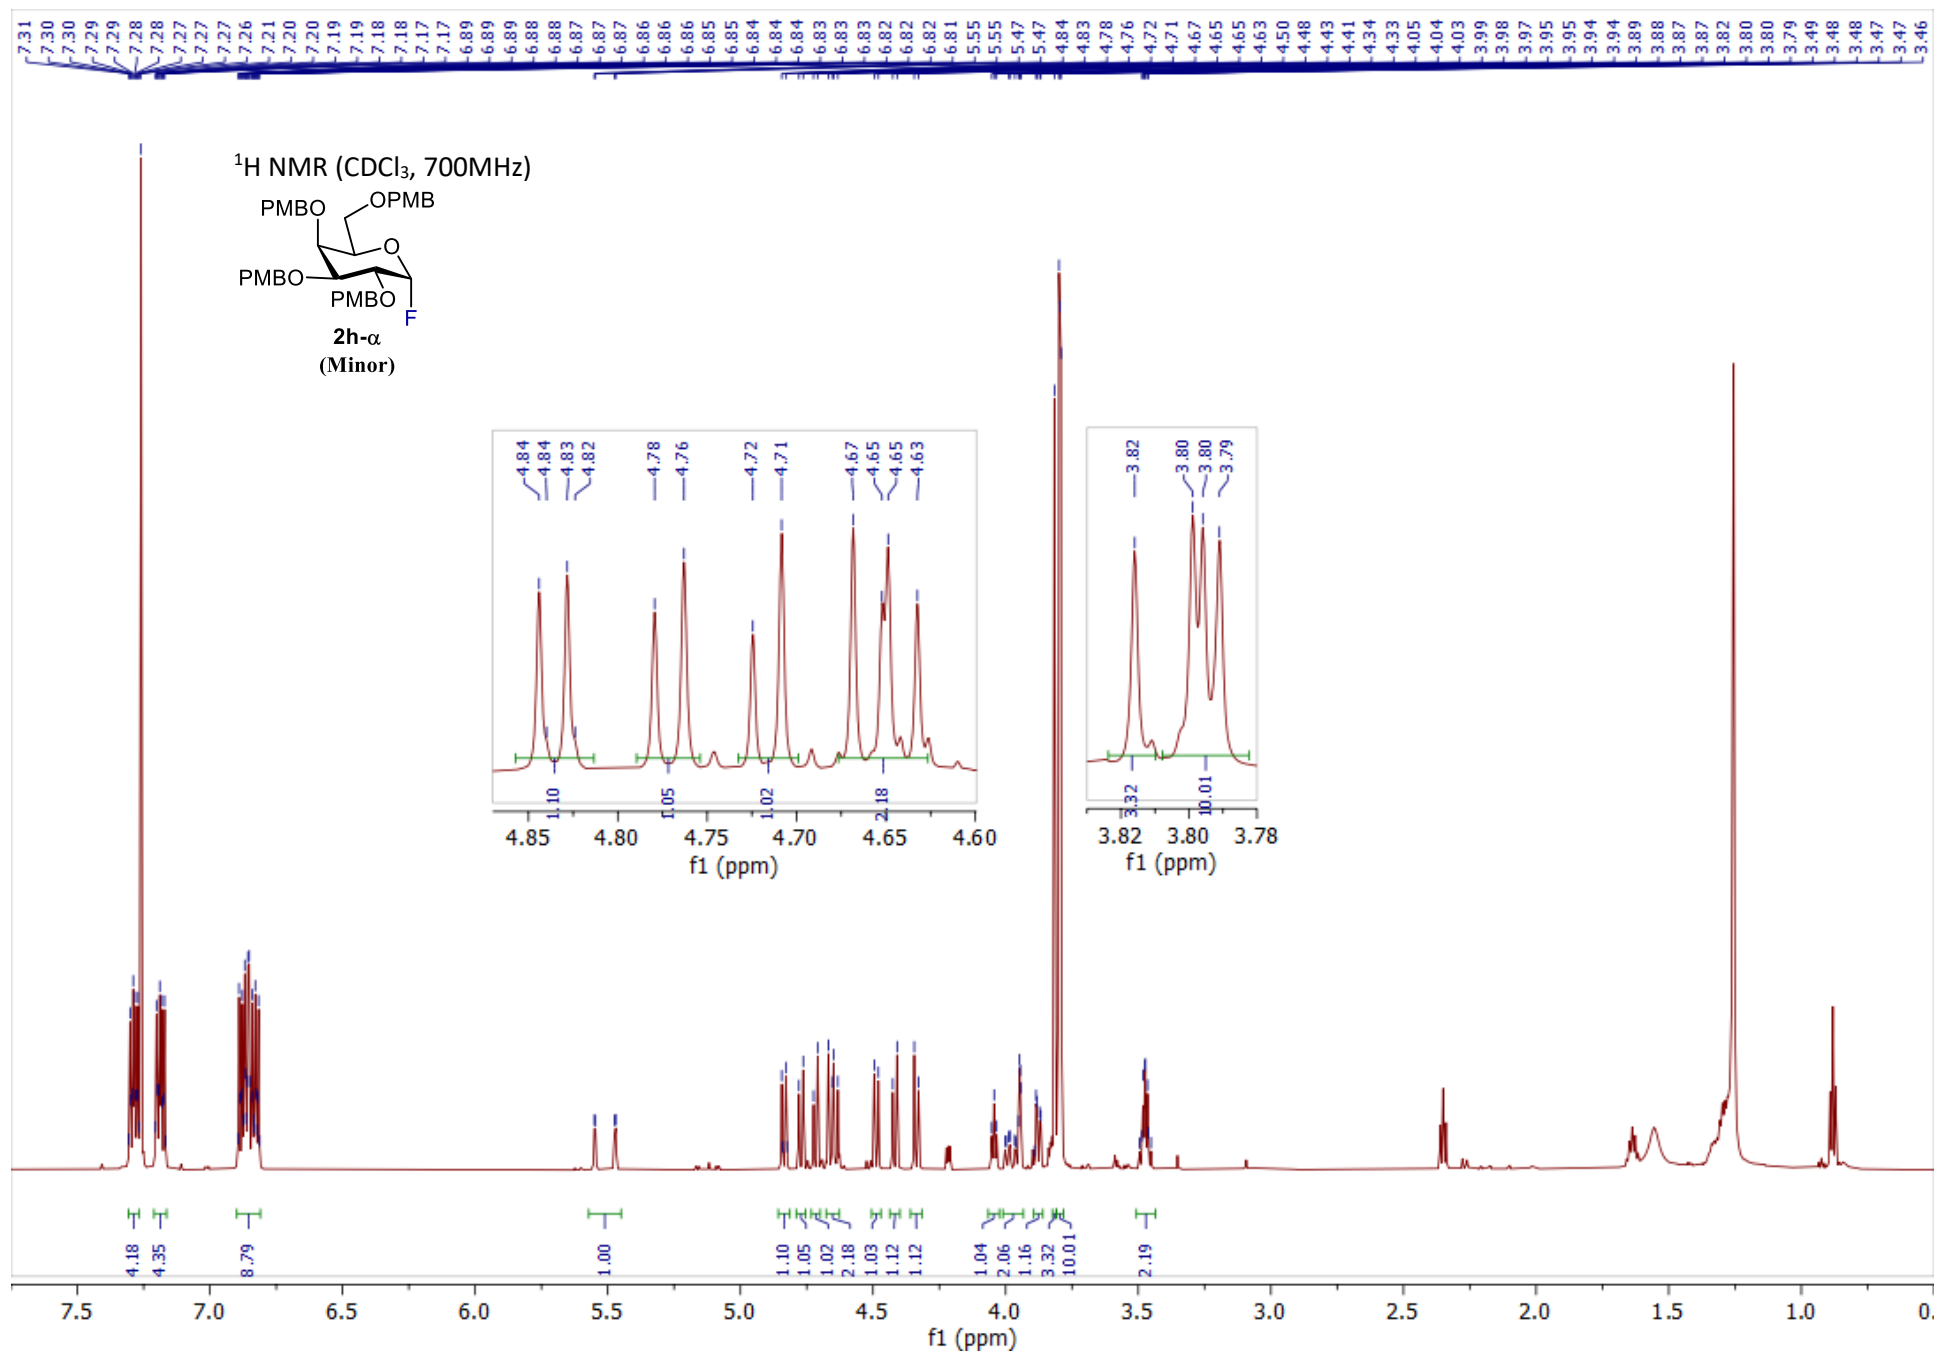

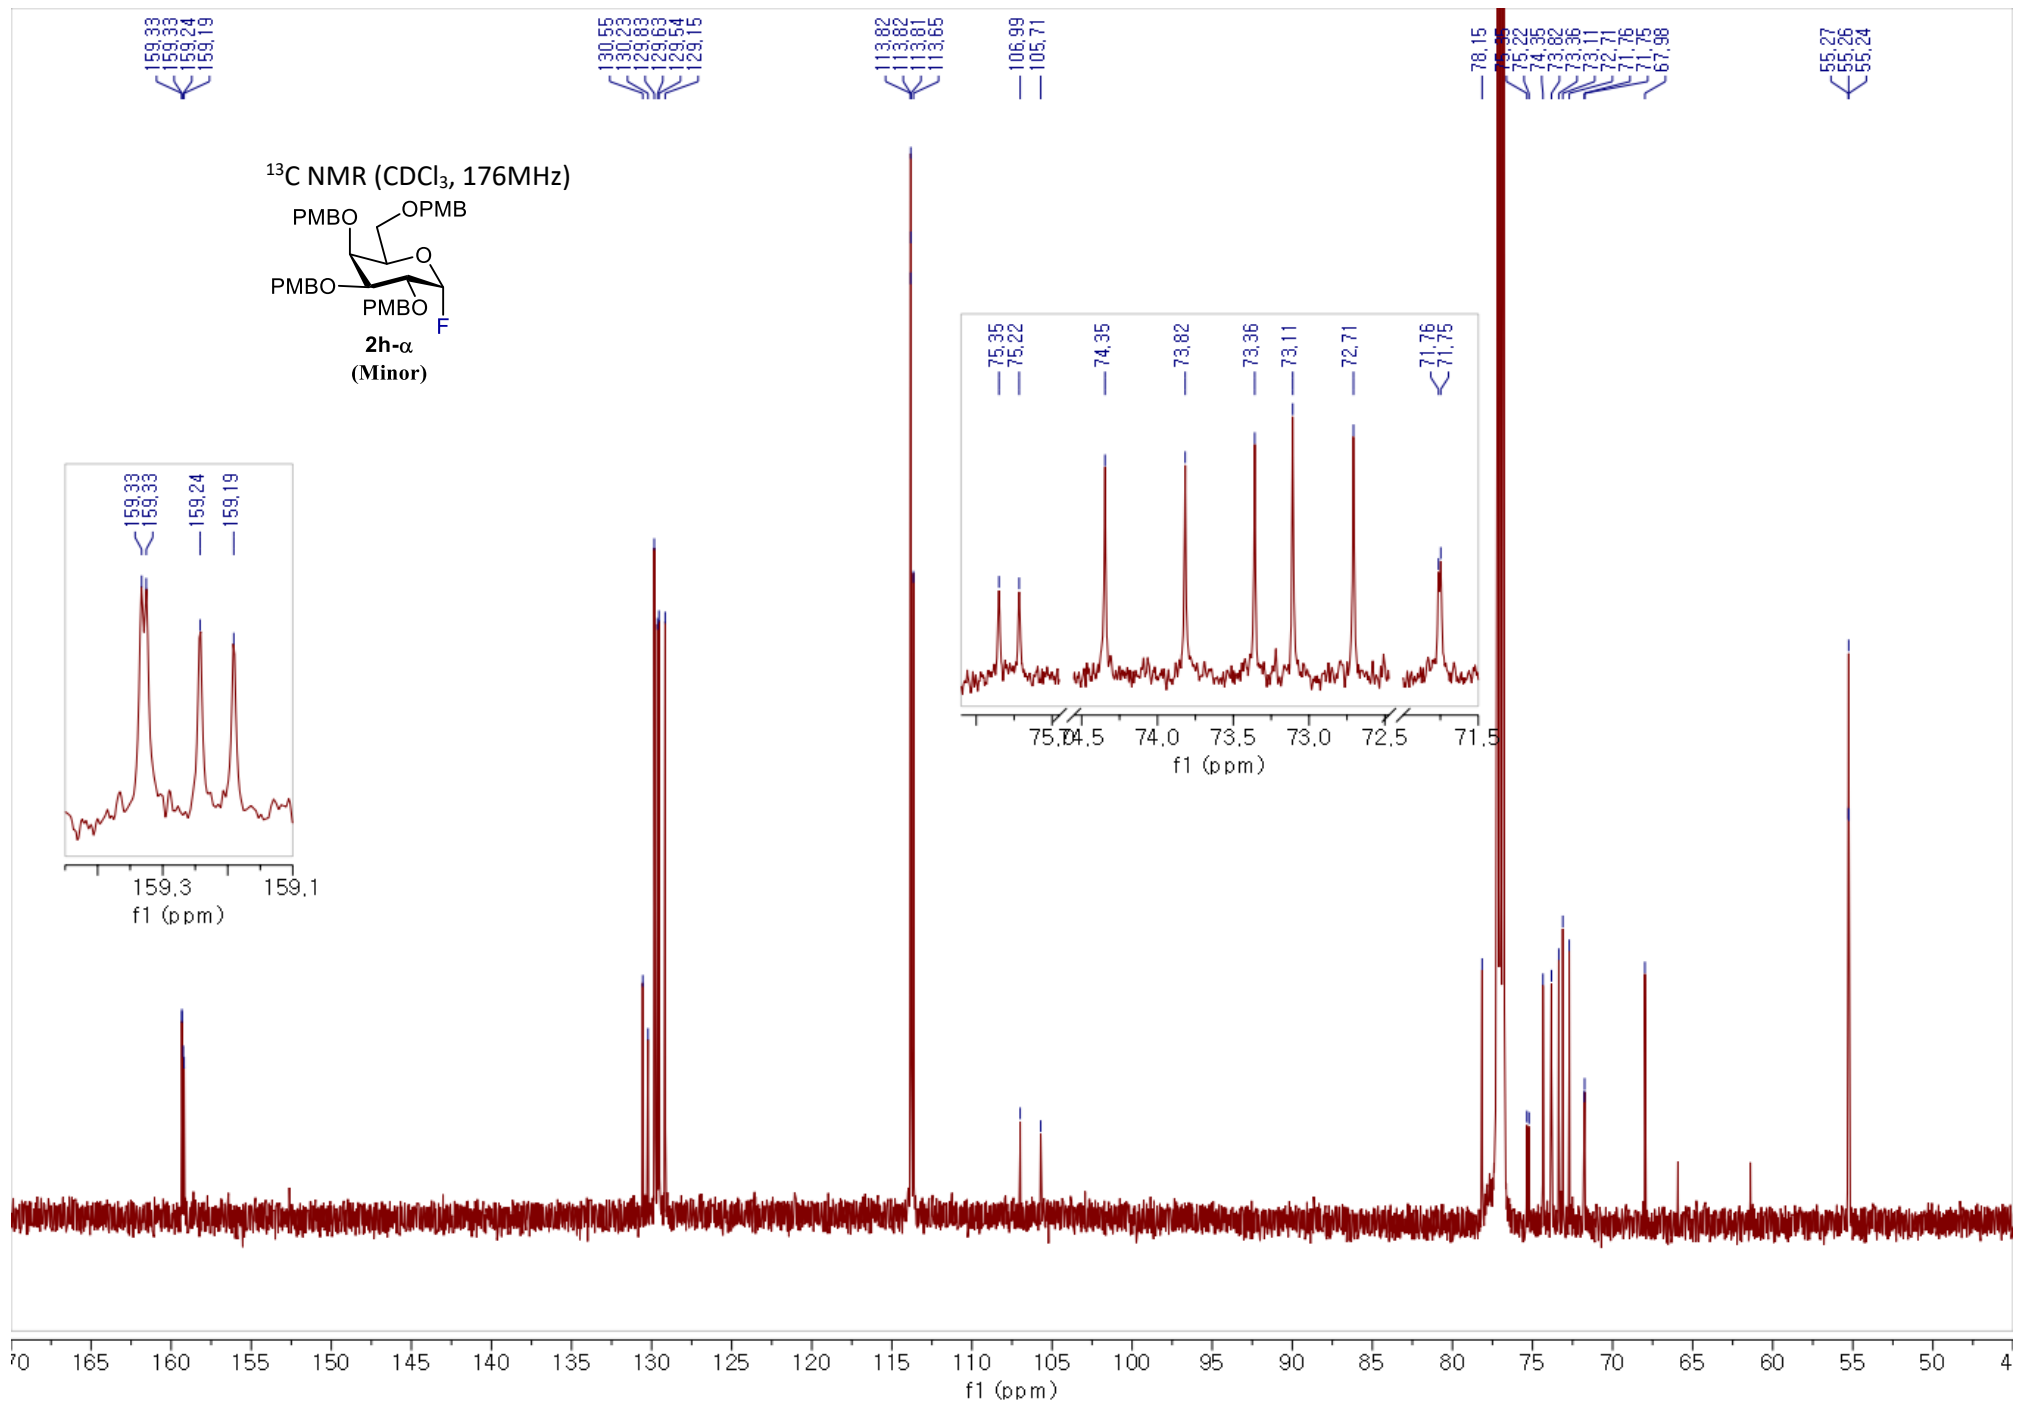

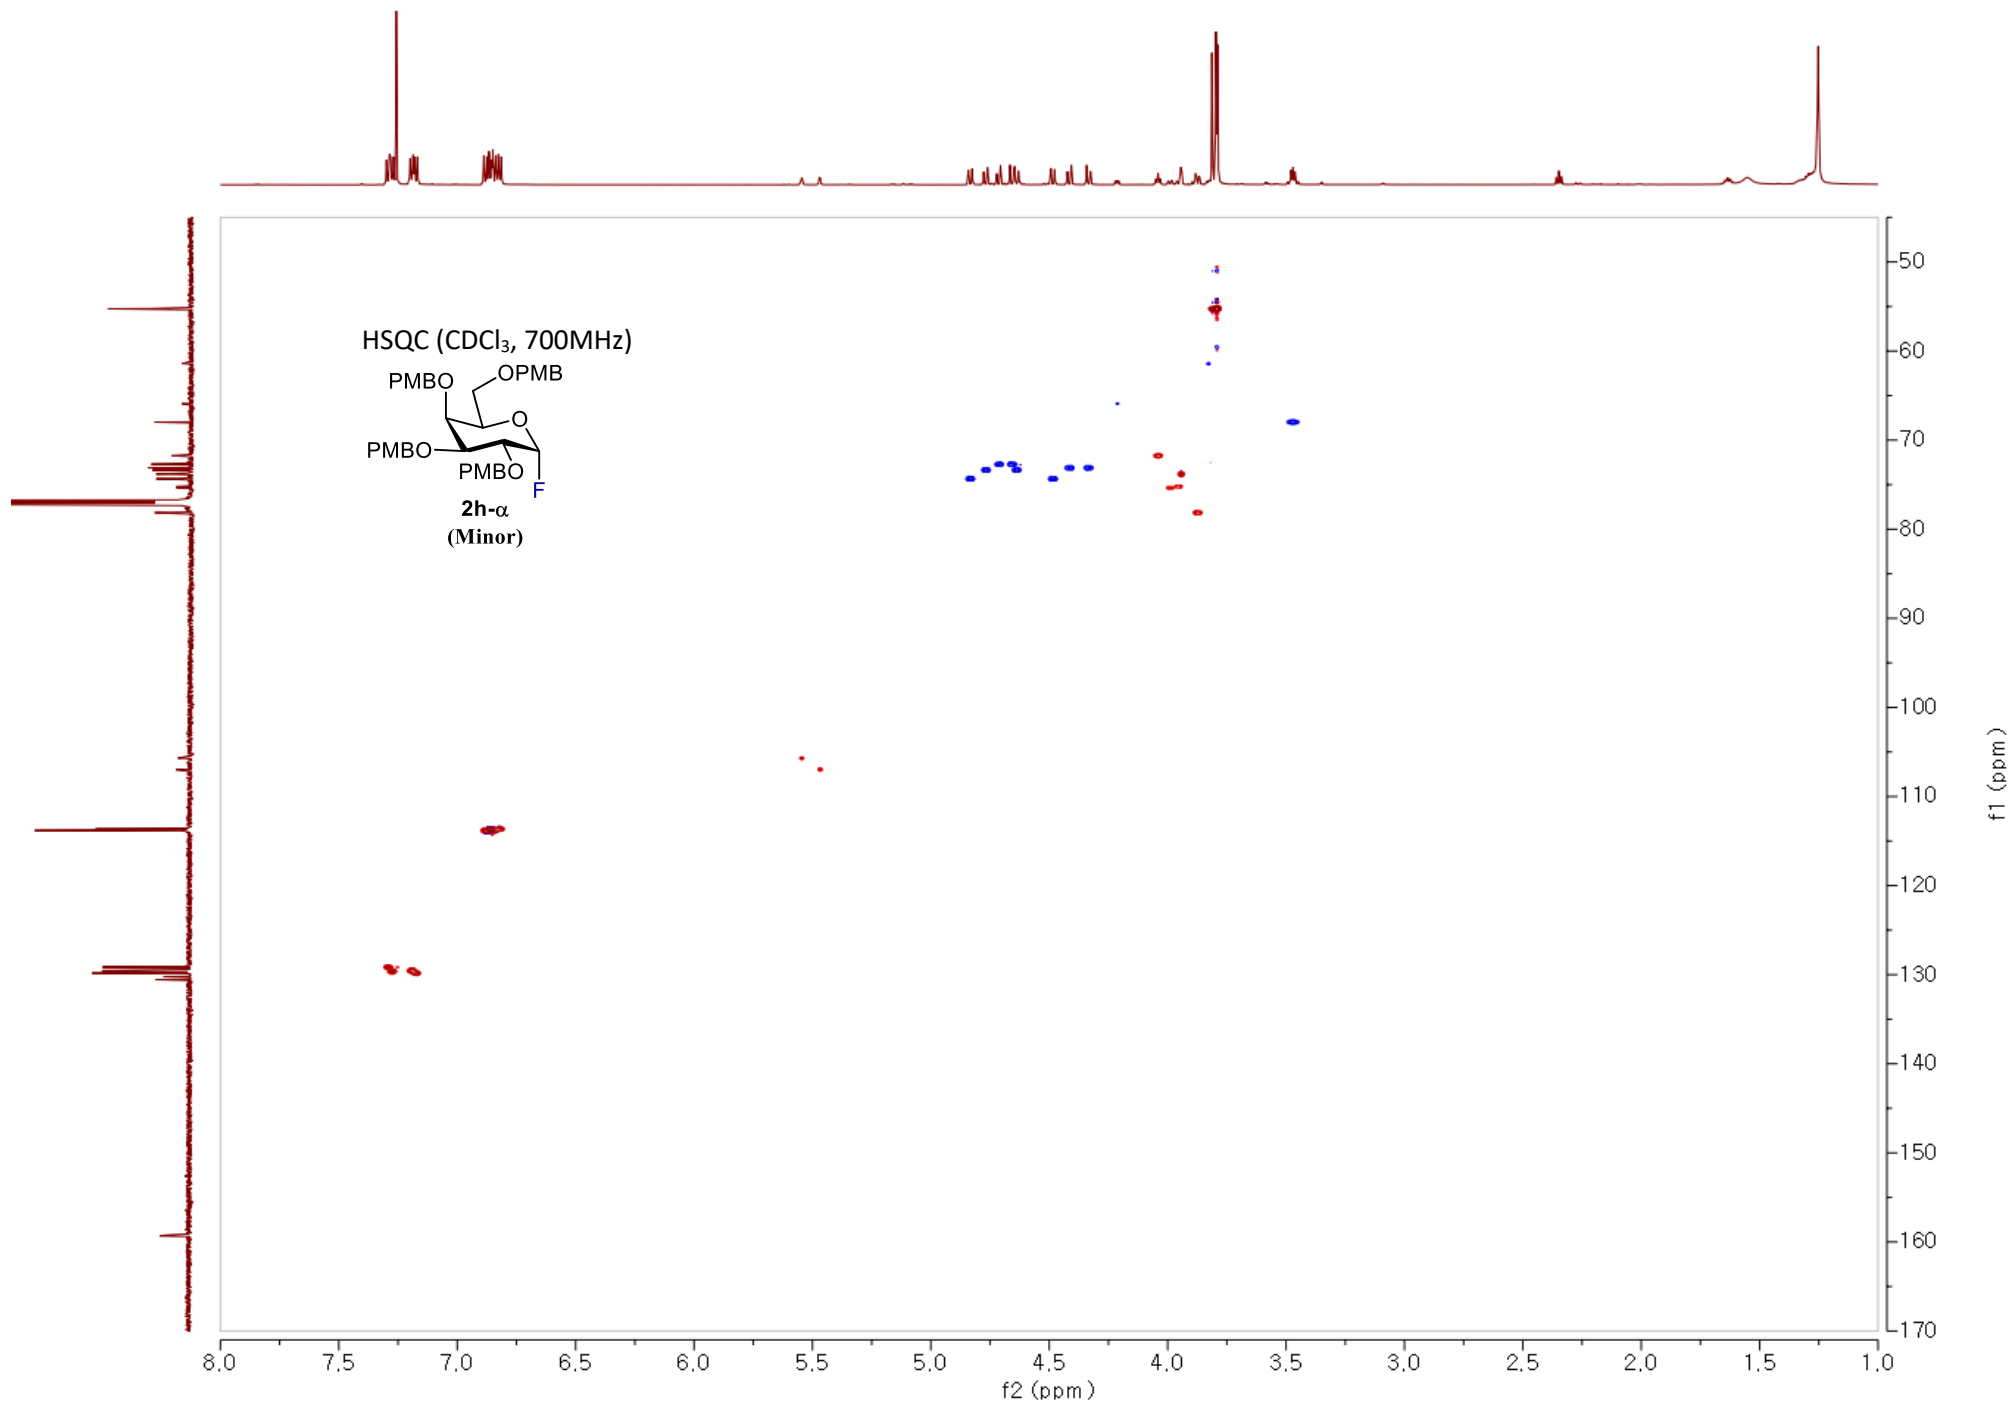

After Work-up  
 $^{19}\text{F}$  NMR ( $\text{CDCl}_3$ , 564 MHz)

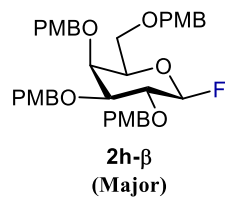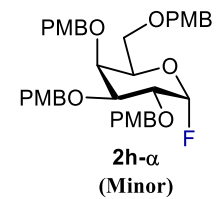

138.97  
138.99  
138.99  
138.97  
138.99

150.11  
150.16  
150.21  
150.26

1.26

1.00

f1 (ppm)



After Purification  
<sup>19</sup>F NMR (CDCl<sub>3</sub>, 564 MHz)

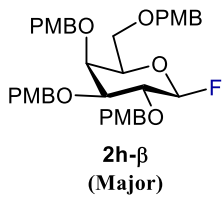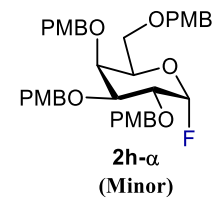

138.95  
138.97  
138.94  
138.95  
138.97

150.07  
150.11  
150.16  
150.21

1.14

1.00

-136 -137 -138 -139 -140 -141 -142 -143 -144 -145 -146 -147 -148 -149 -150 -151 -152 -153 -154 -1

f1 (ppm)

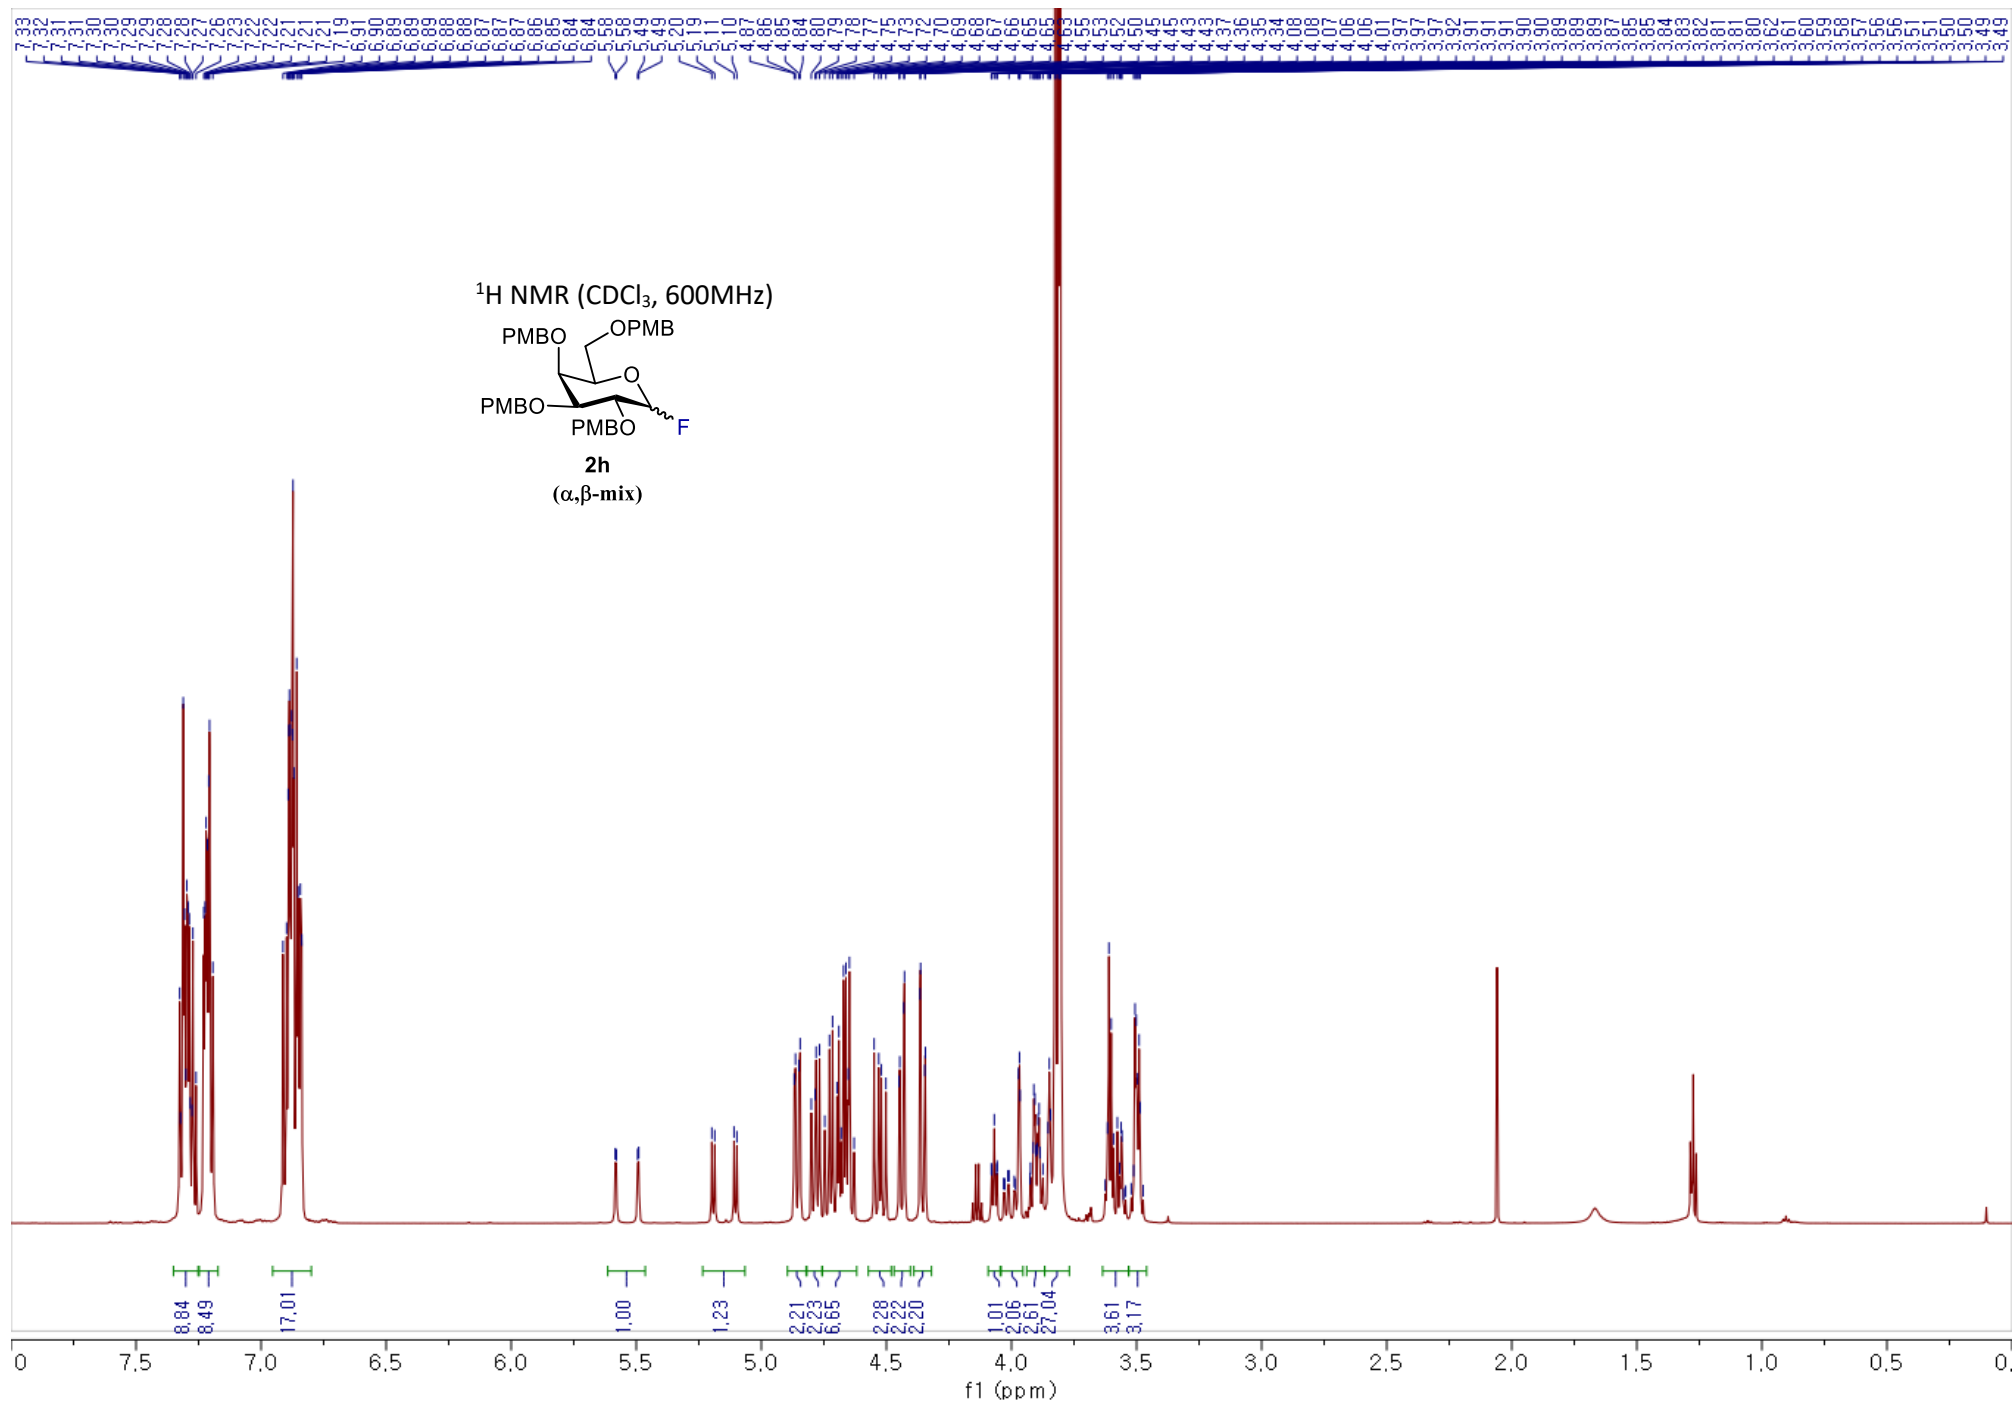

2,3,4,6-Tetrakis-O-[(4-methoxyphenyl)methyl]- $\beta$ -D-glucopyranosyl fluoride (2i, Isolated as  $\alpha : \beta = 1 : 1.4$  mixture)

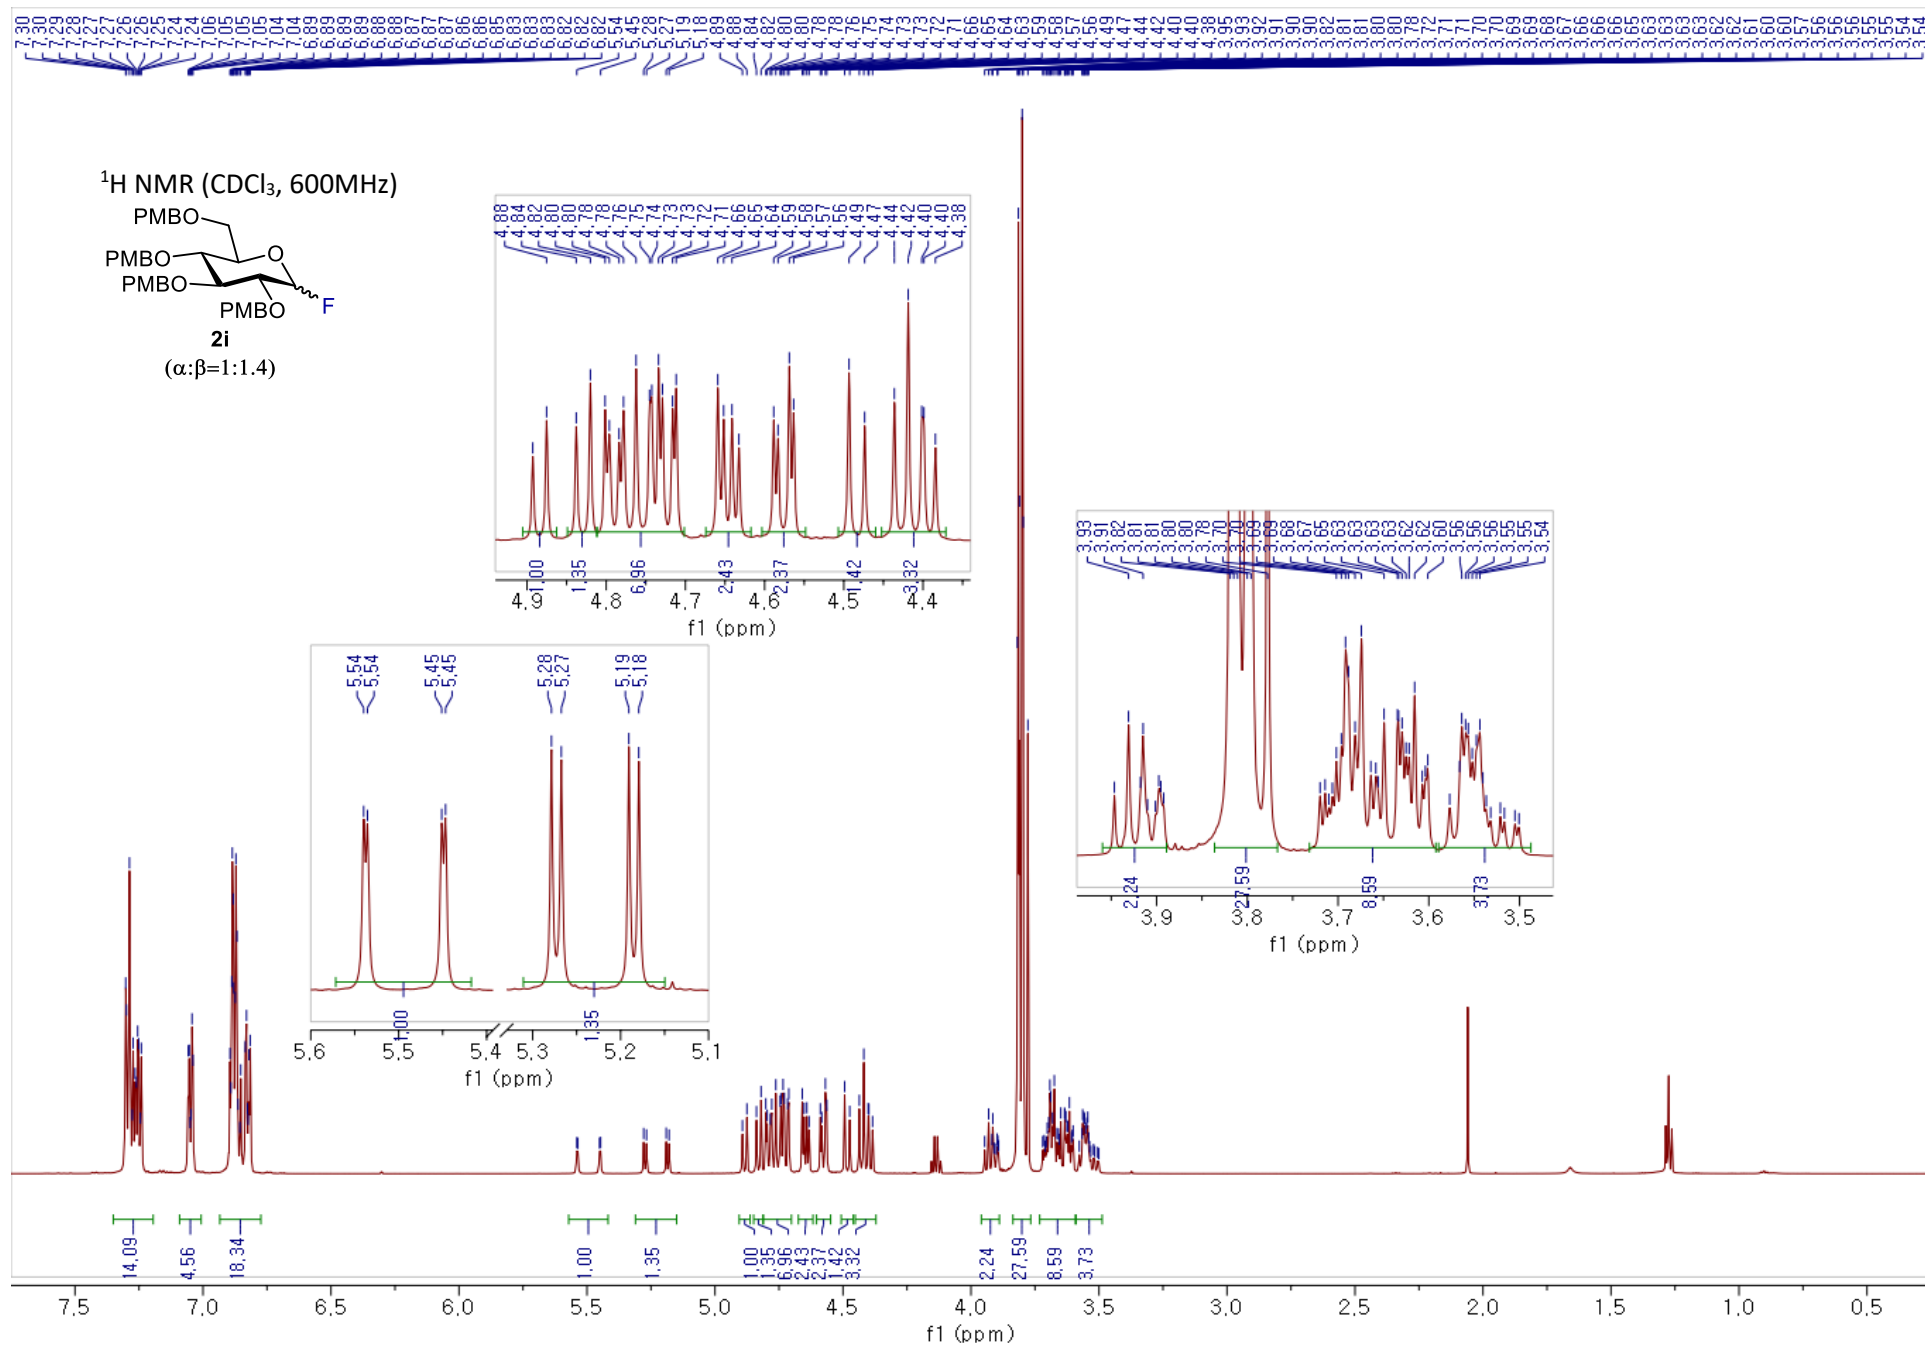

After Work-up  
 $^{19}\text{F}$  NMR ( $\text{CDCl}_3$ , 564 MHz)

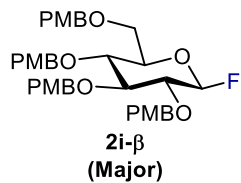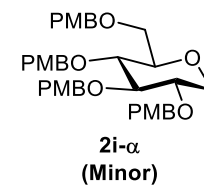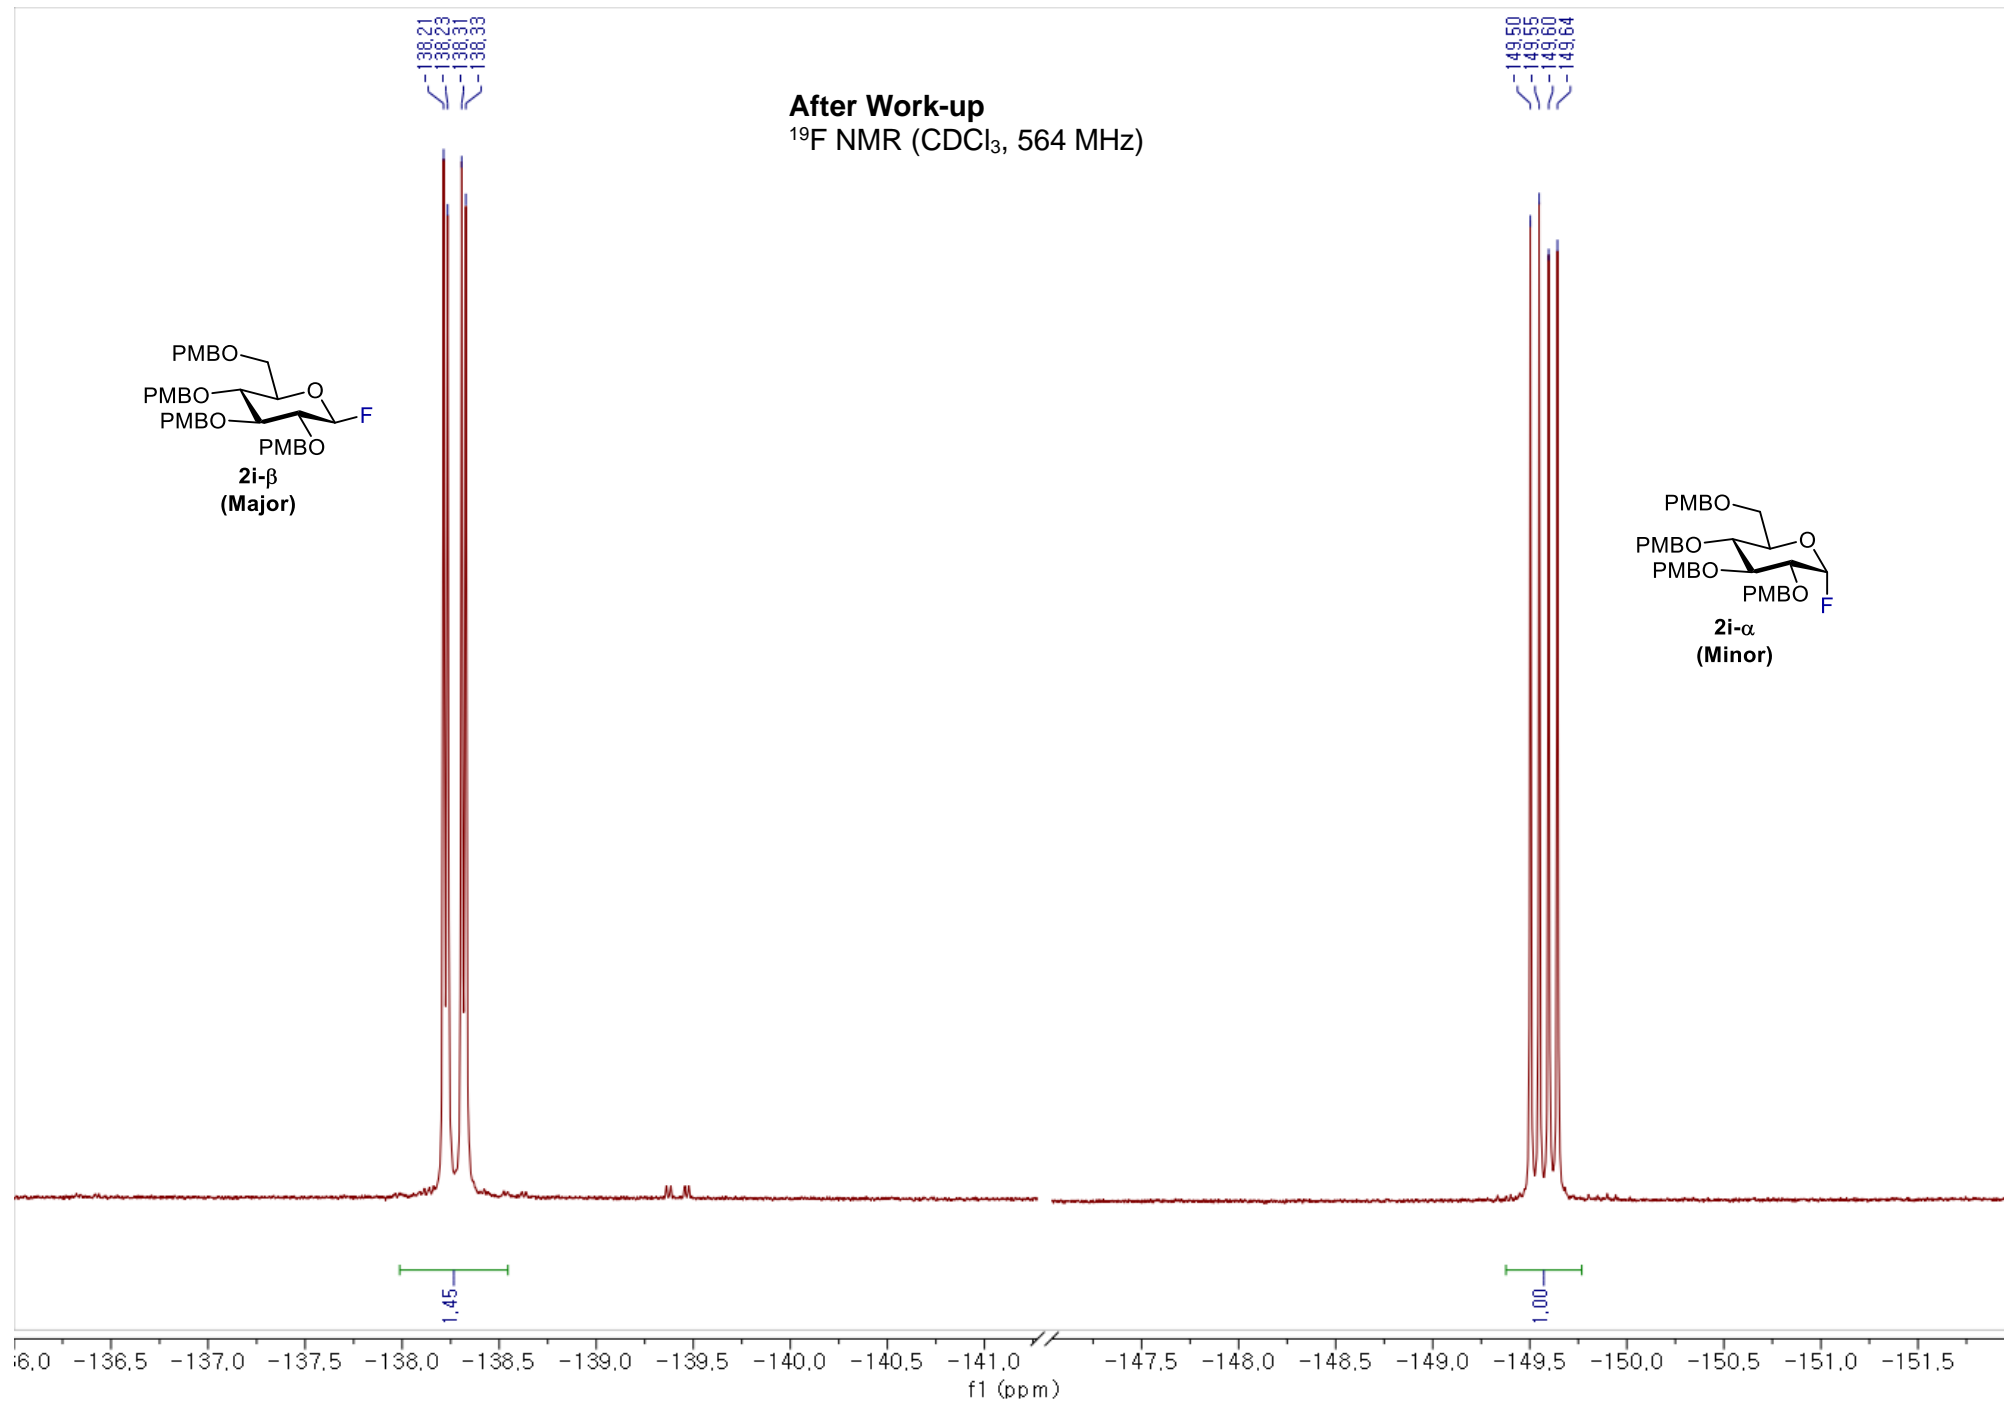

After Purification  
<sup>19</sup>F NMR (CDCl<sub>3</sub>, 564 MHz)

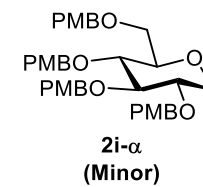

138.23  
138.25  
138.32  
138.35

149.47  
149.52  
149.57  
149.61

1.43

1.00

16.0 -136.5 -137.0 -137.5 -138.0 -138.5 -139.0 -139.5 -140.0 -140.5 -141.0 -141.5 -147.0 -147.5 -148.0 -148.5 -149.0 -149.5 -150.0 -150.5 -151.0 -151.5  
f1 (ppm)

2,3,4,6-Tetrakis-O-[(4-methoxyphenyl)methyl]- $\alpha$ -D-mannopyranosyl fluoride (2j- $\alpha$ , Major diastereomer)

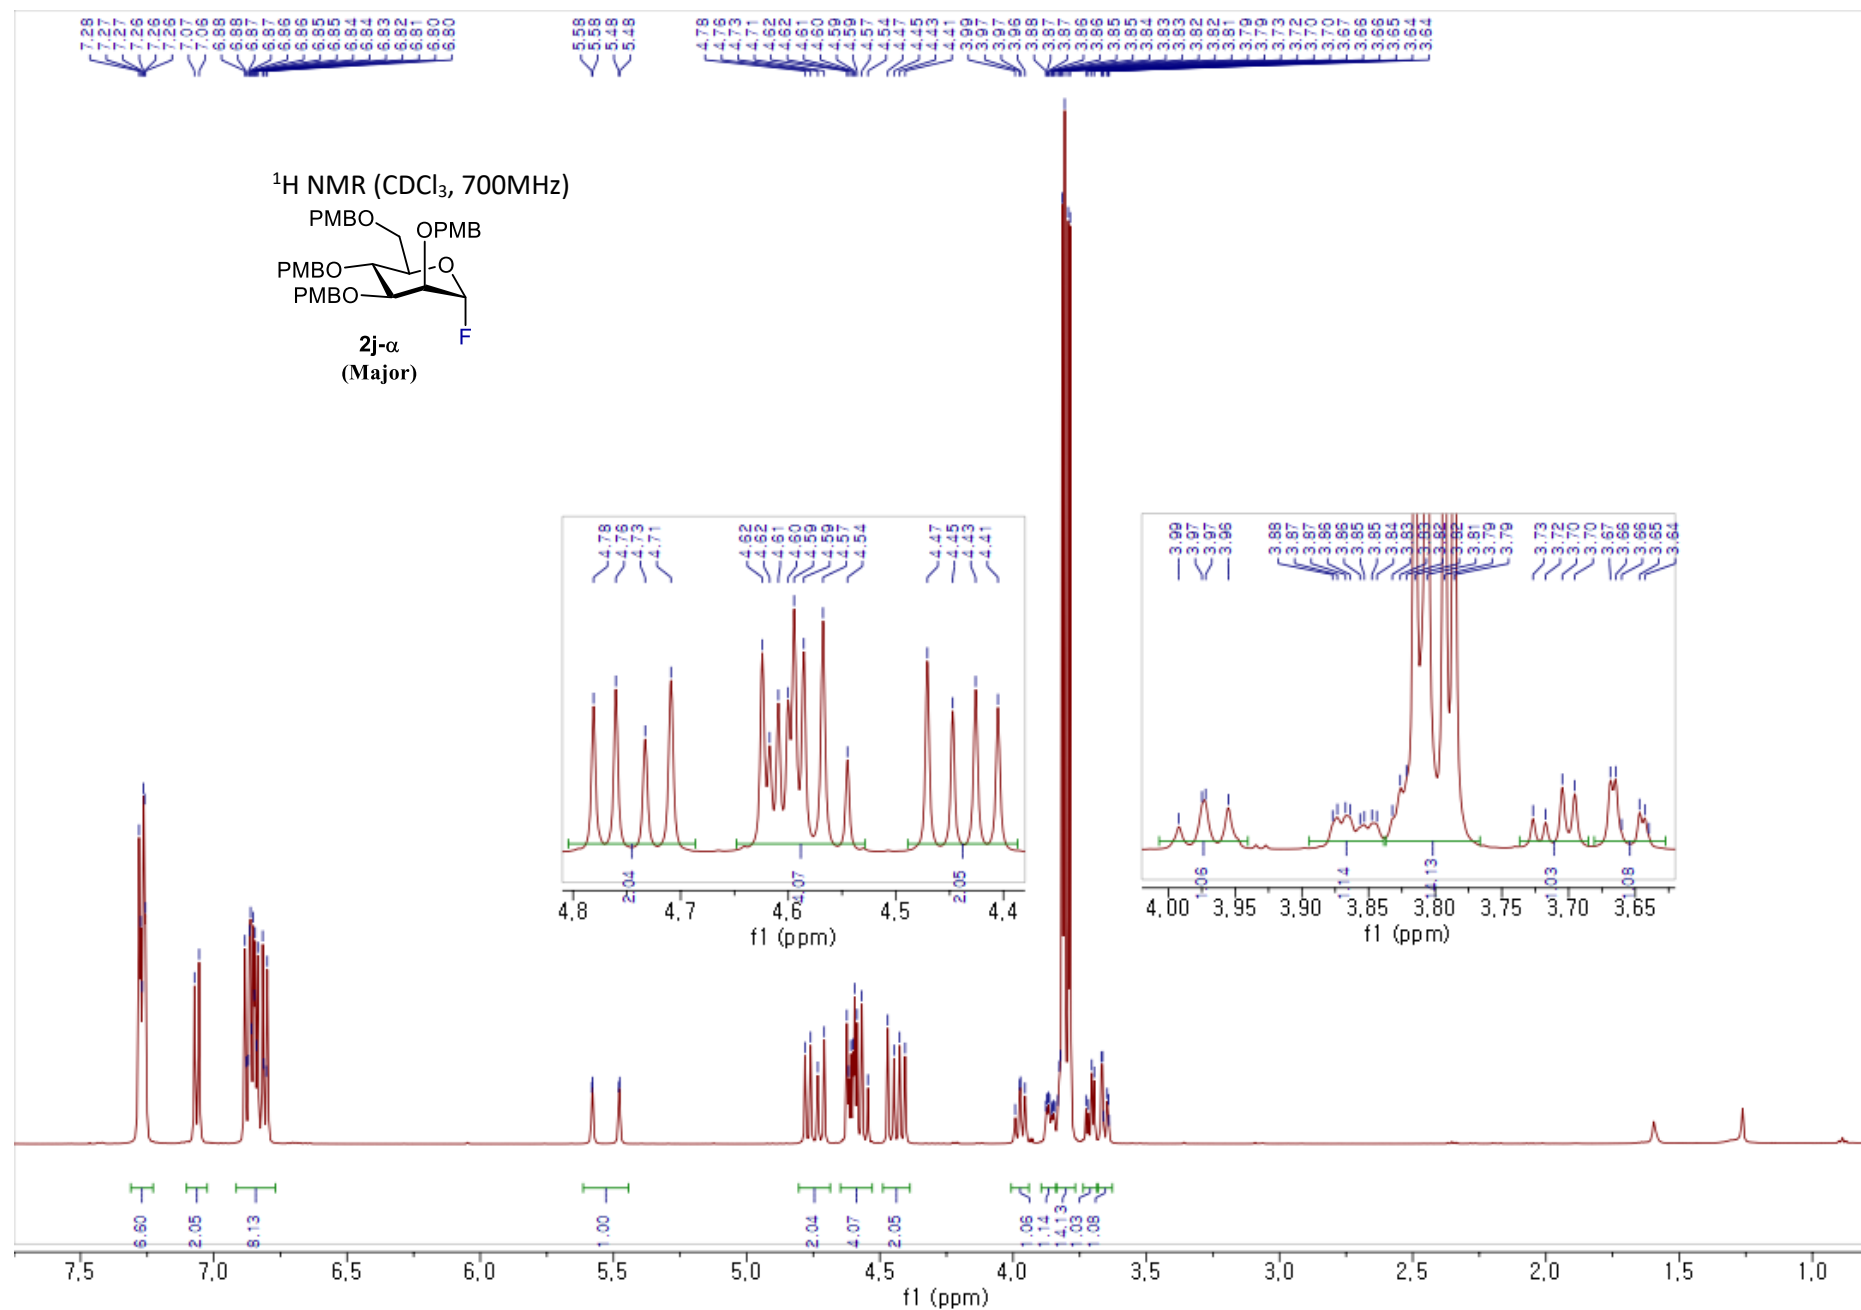

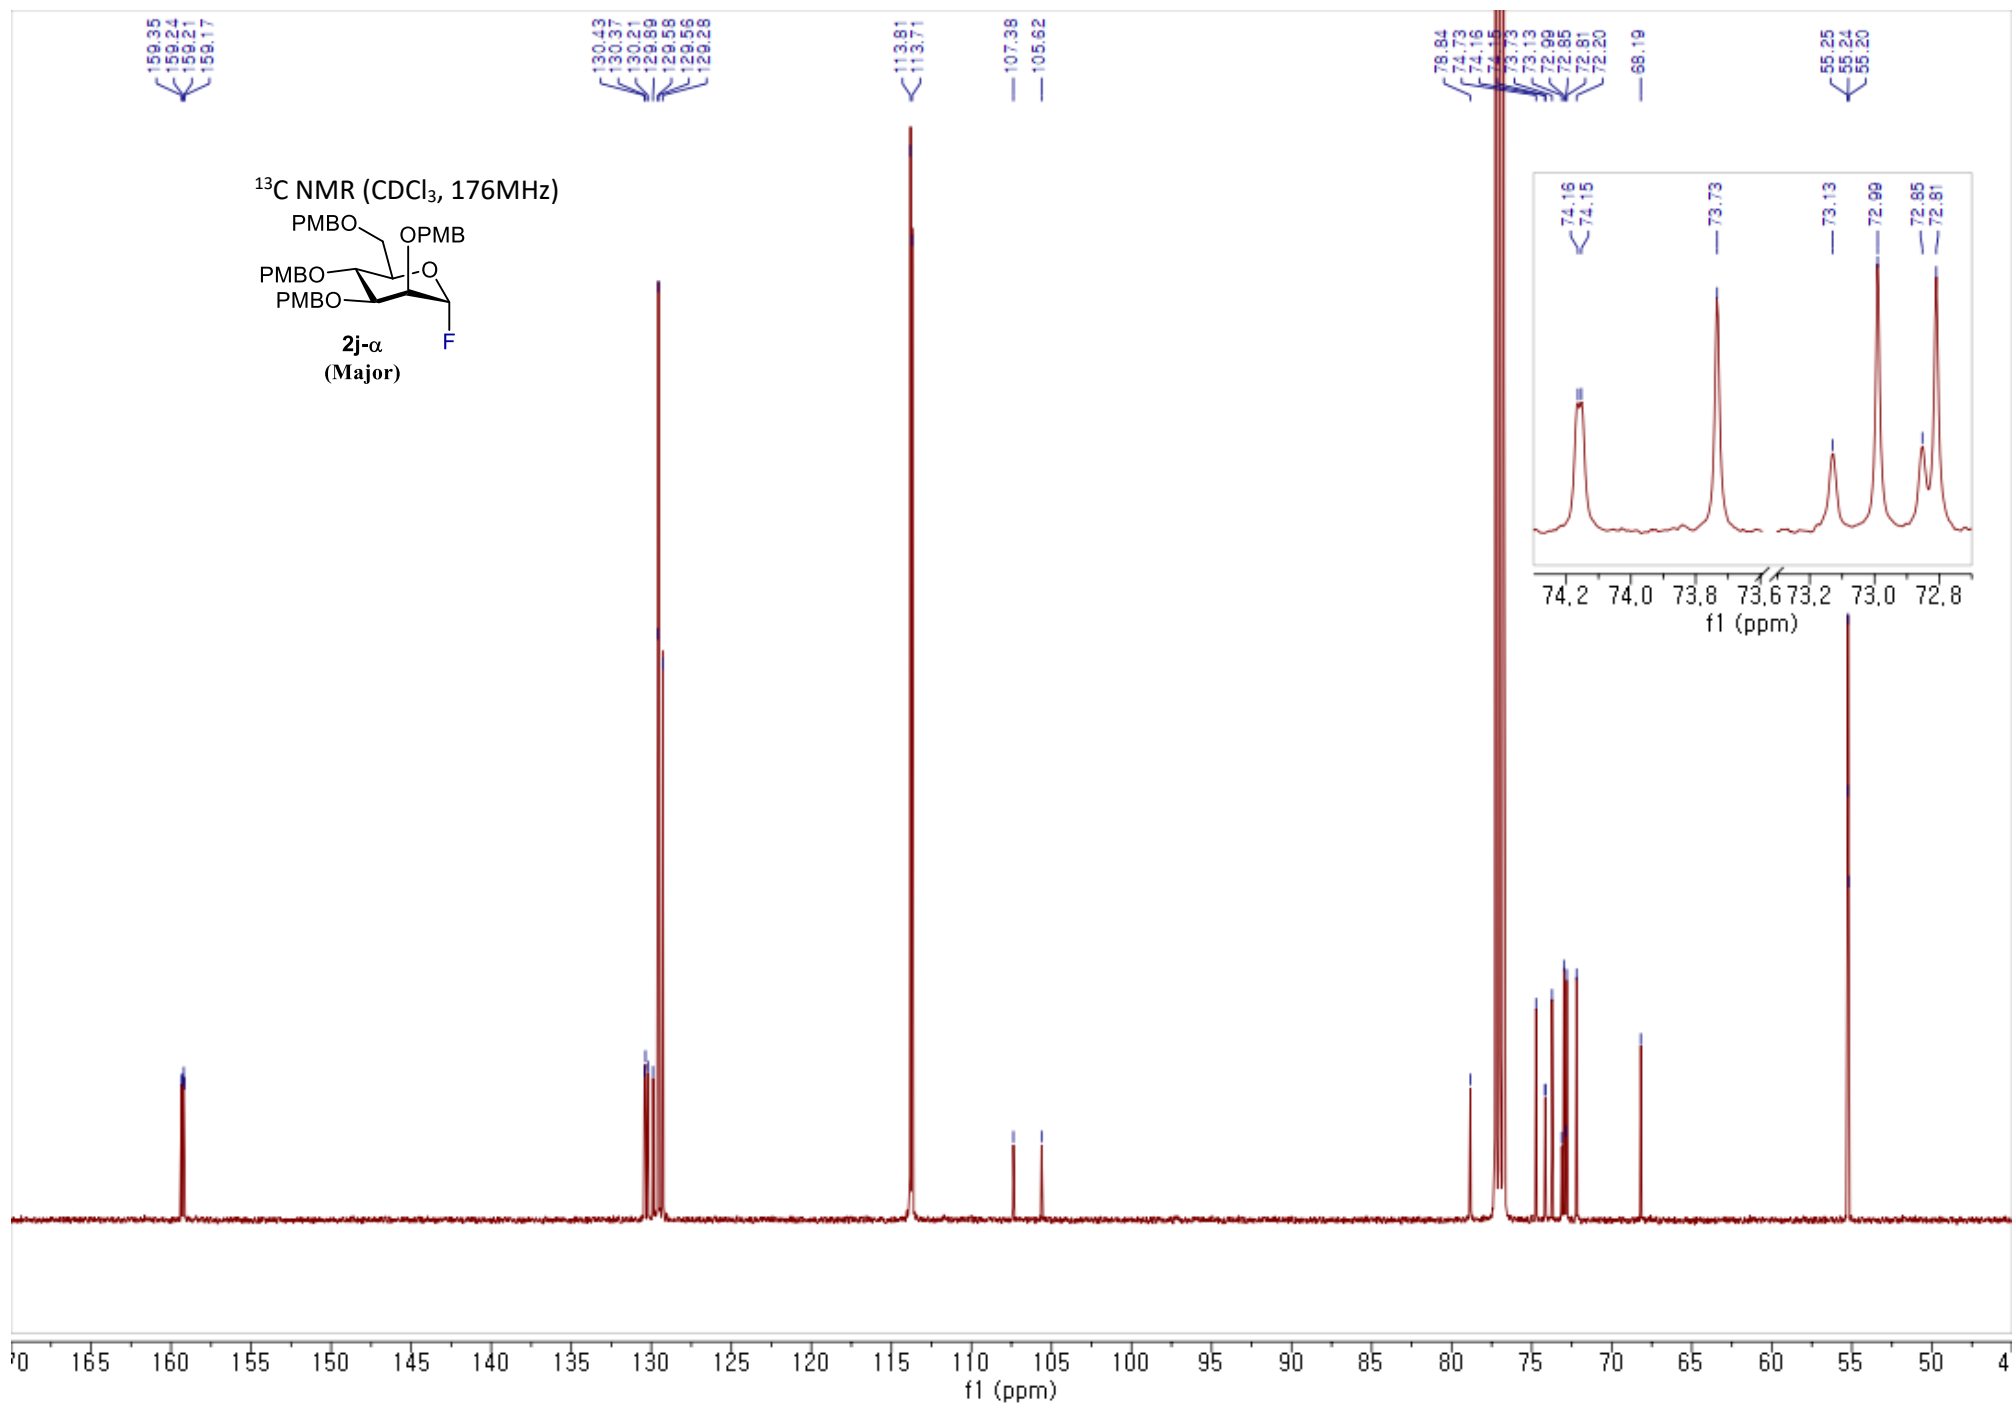

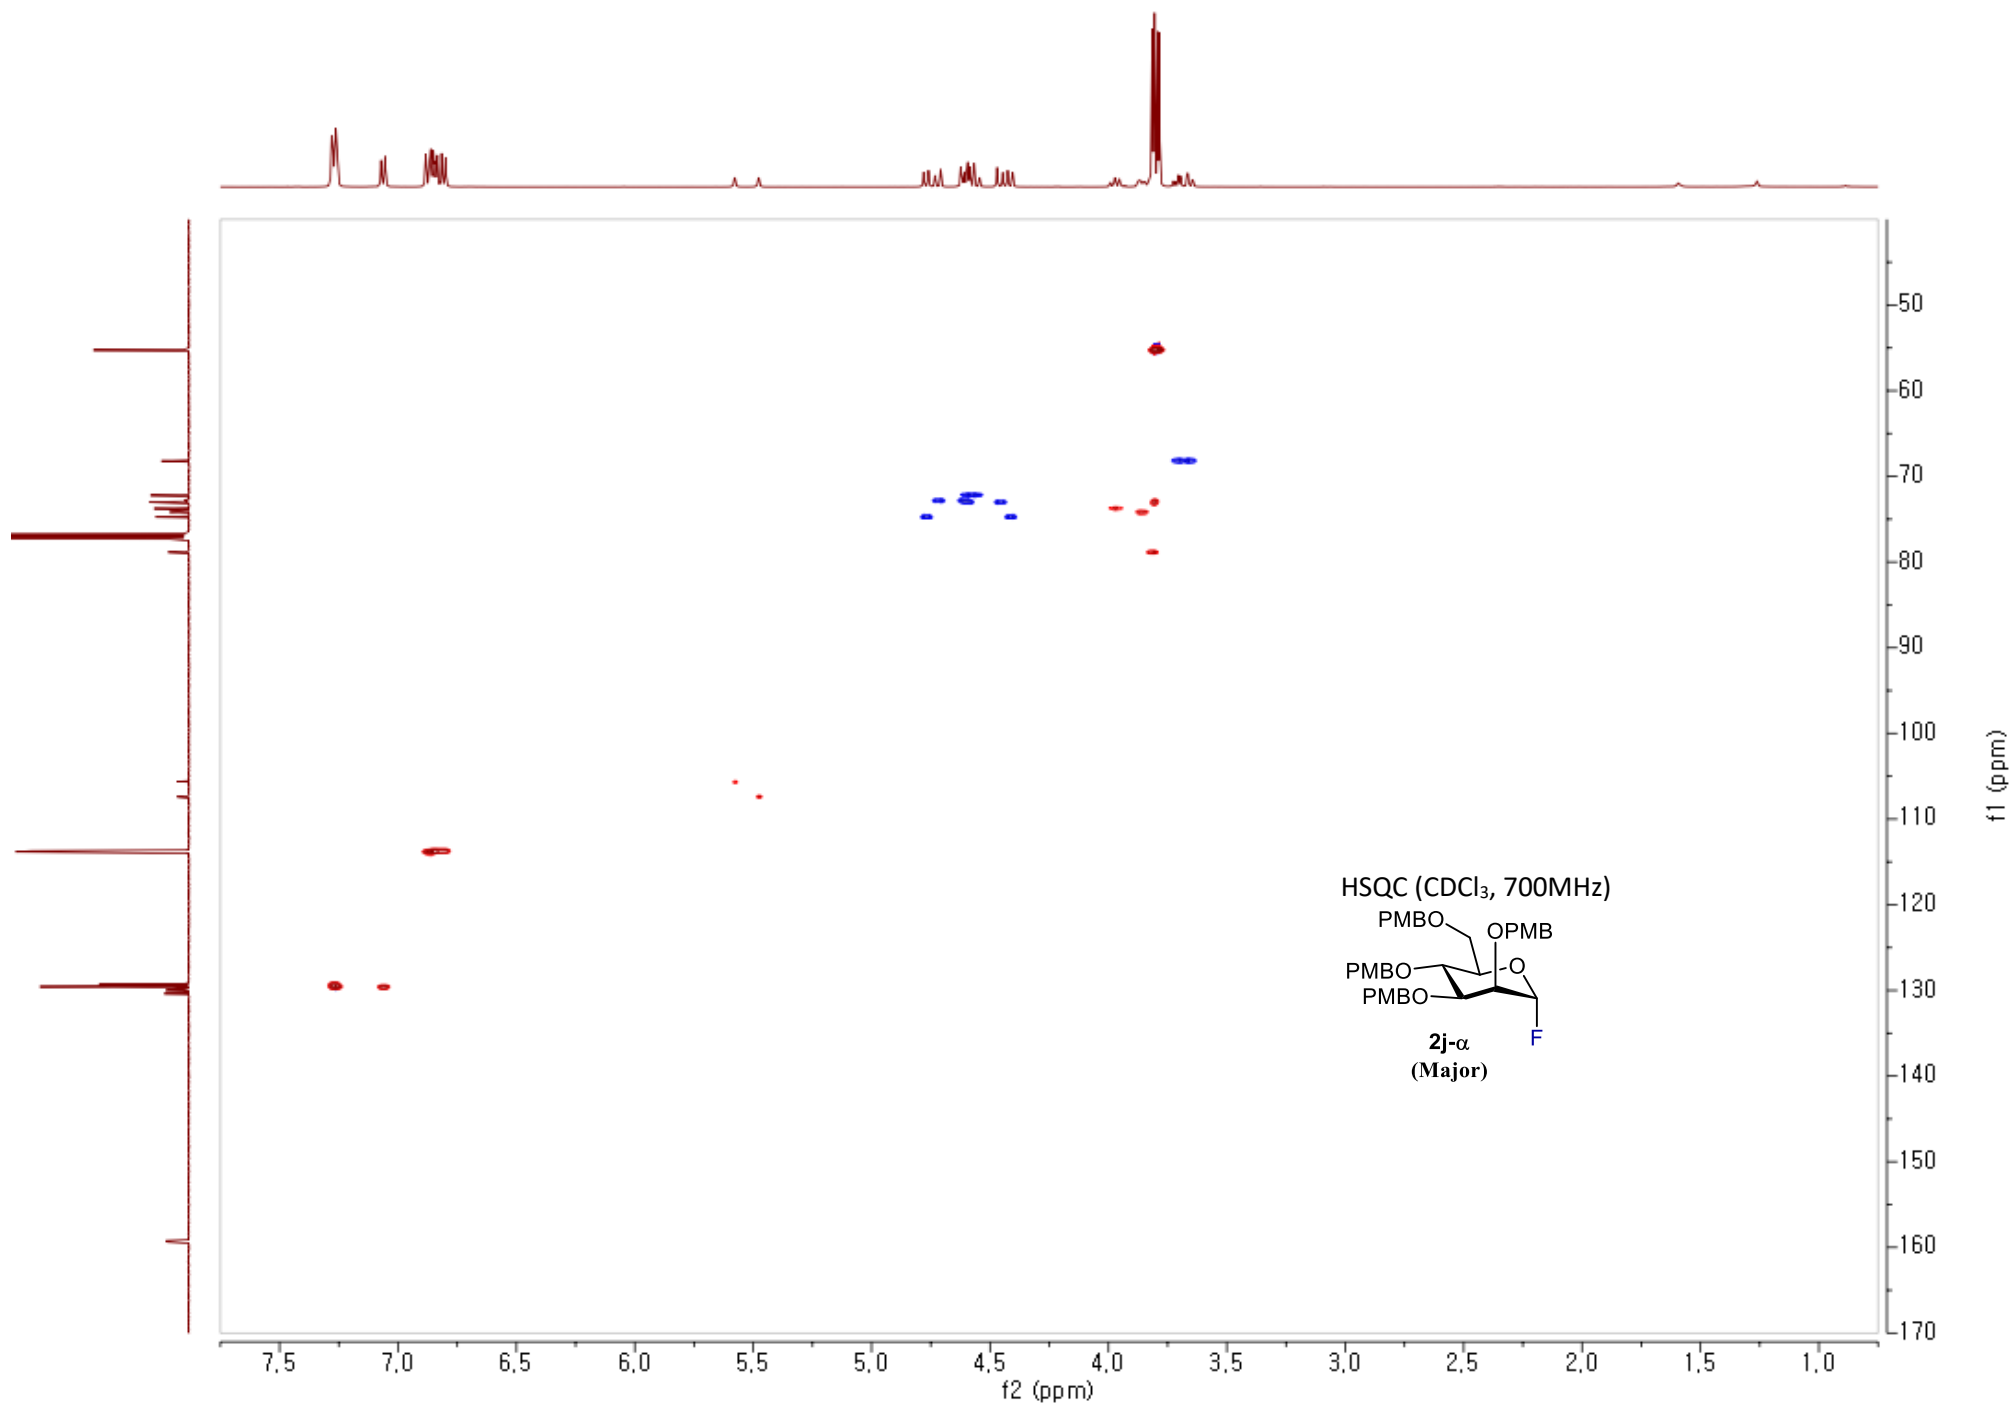



After Work-up  
<sup>19</sup>F NMR (CDCl<sub>3</sub>, 564 MHz)

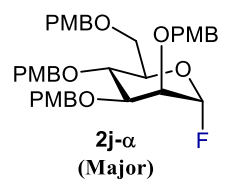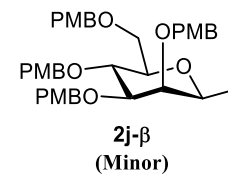

137.87  
137.95

140.95  
141.04

22.70

1.00

-136.0 -136.5 -137.0 -137.5 -138.0 -138.5 -139.0 -139.5 -140.0 -140.5 -141.0 -141.5 -142.0 -142.5

f1 (ppm)

125

After Purification  
<sup>19</sup>F NMR (CDCl<sub>3</sub>, 564 MHz)

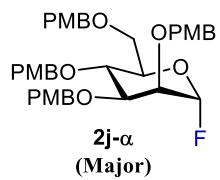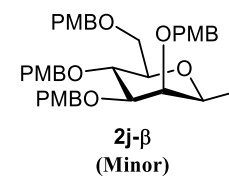

-137.84  
-137.92

-140.94  
-140.96  
-141.03  
-141.05

22.78

1.00

-136.0 -136.5 -137.0 -137.5 -138.0 -138.5 -139.0 -139.5 -140.0 -140.5 -141.0 -141.5 -142.0 -142.5

f1 (ppm)

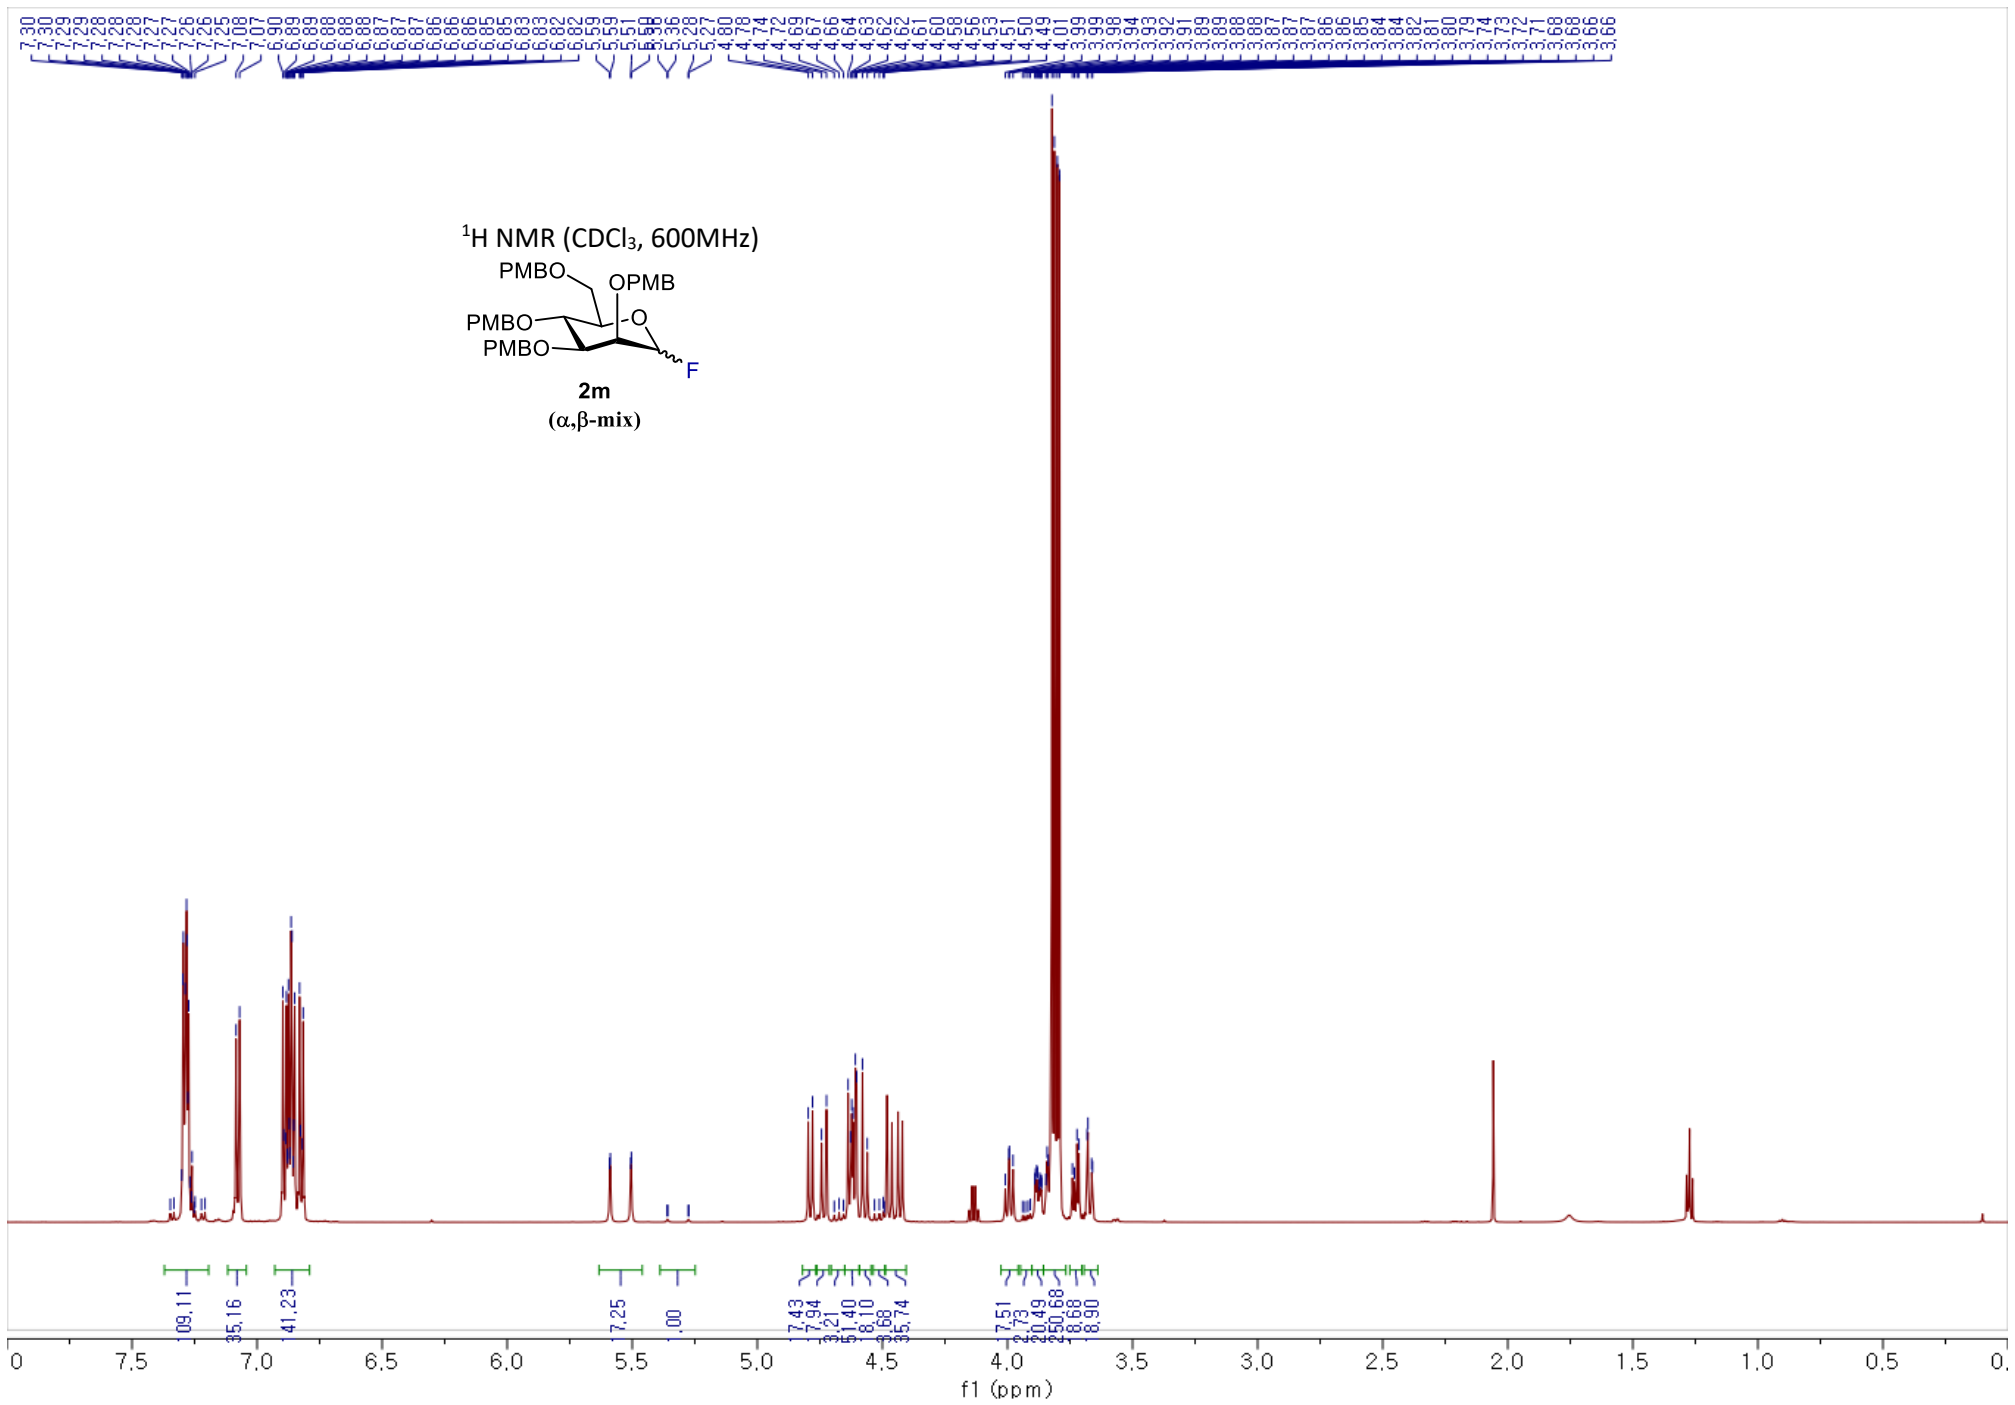

2,3,4,6-Tetra-O-acetyl- $\alpha$ -D-galactopyranosyl fluoride (2k- $\alpha$ , Major diastereomer)

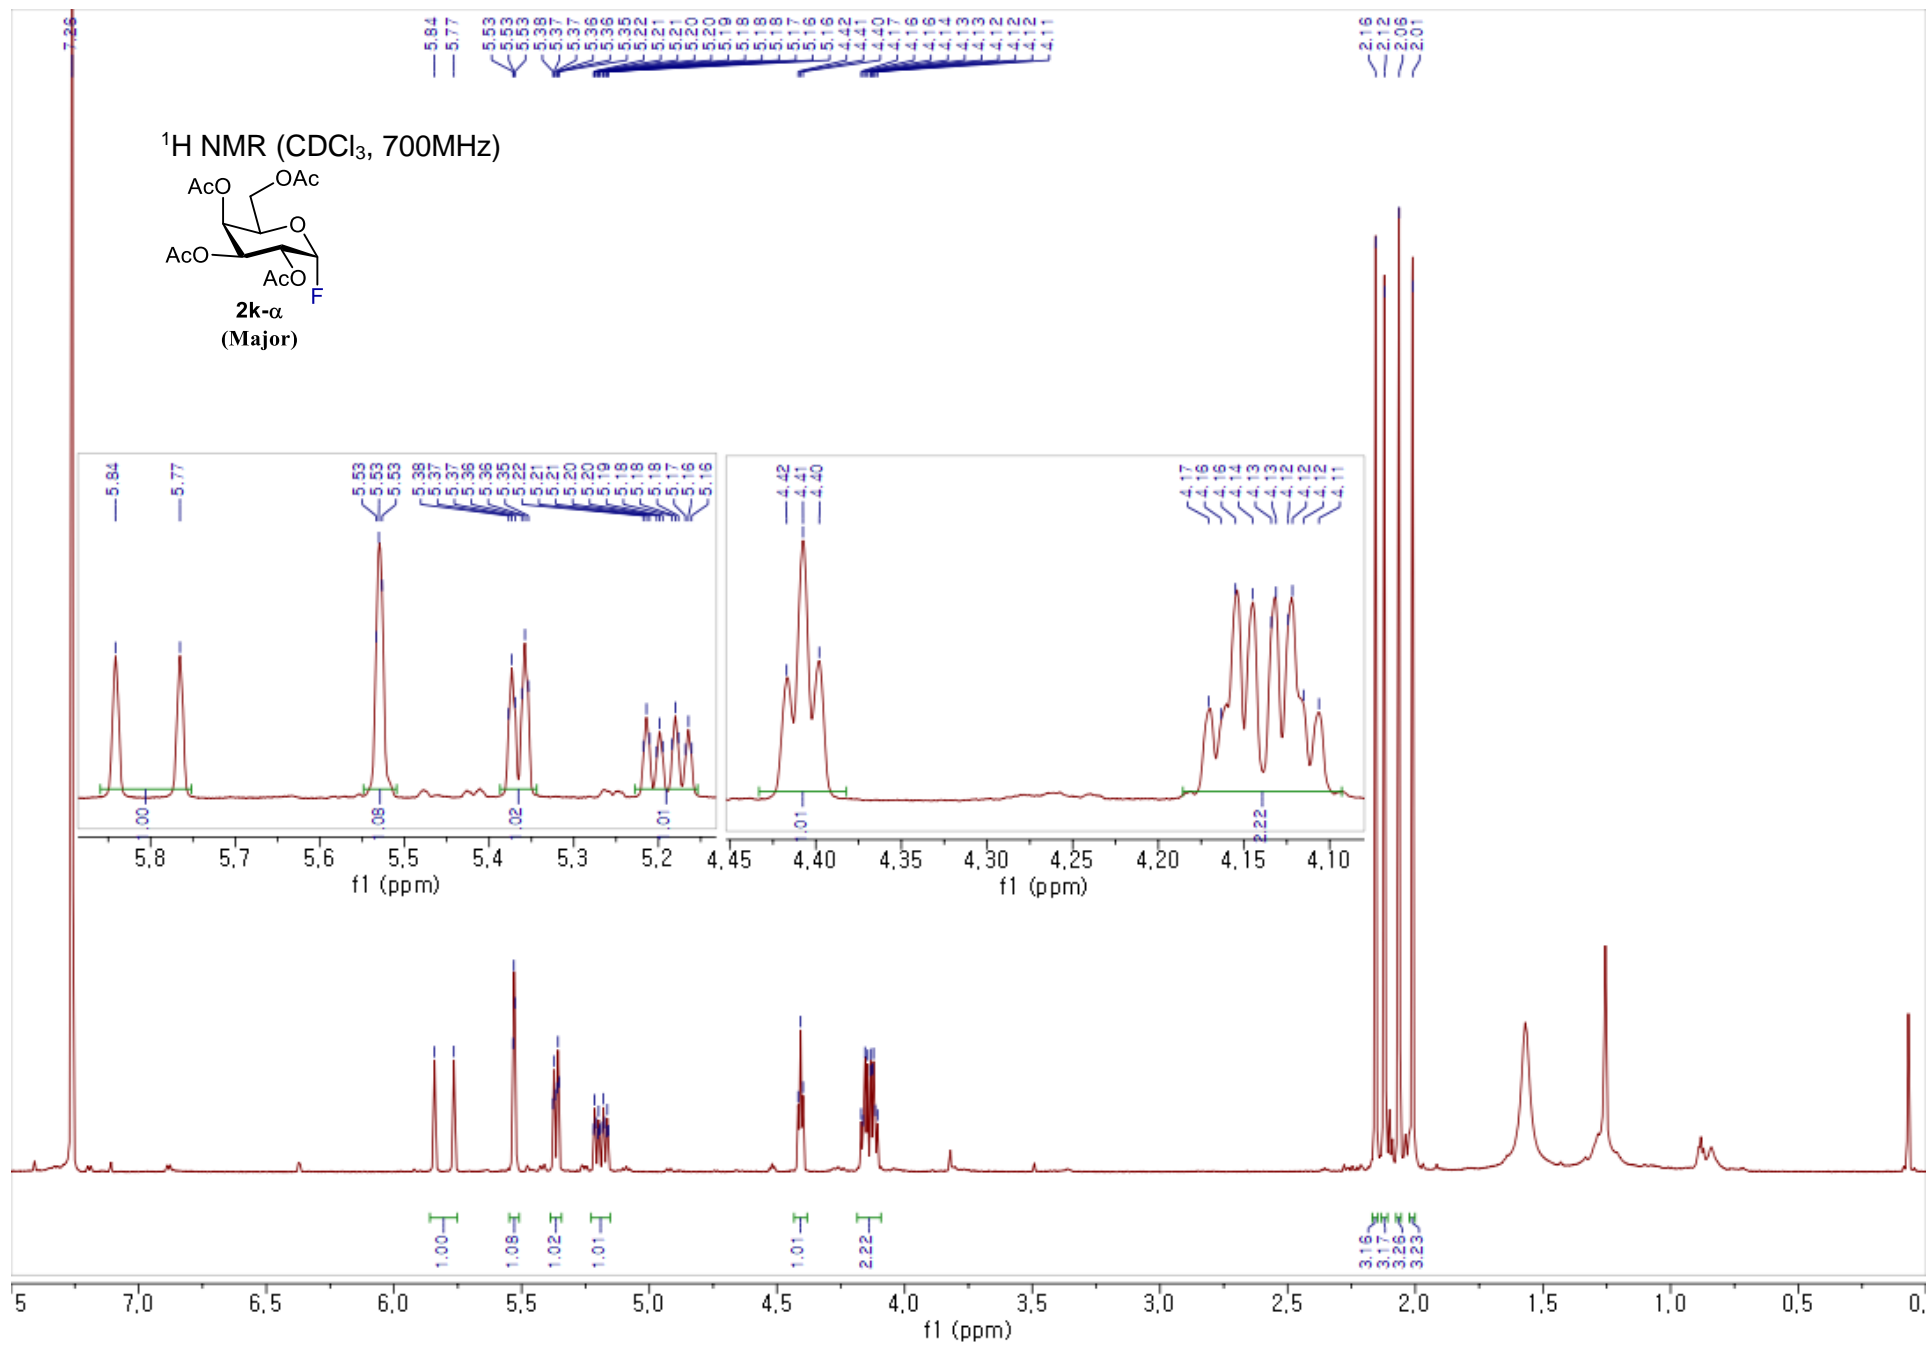

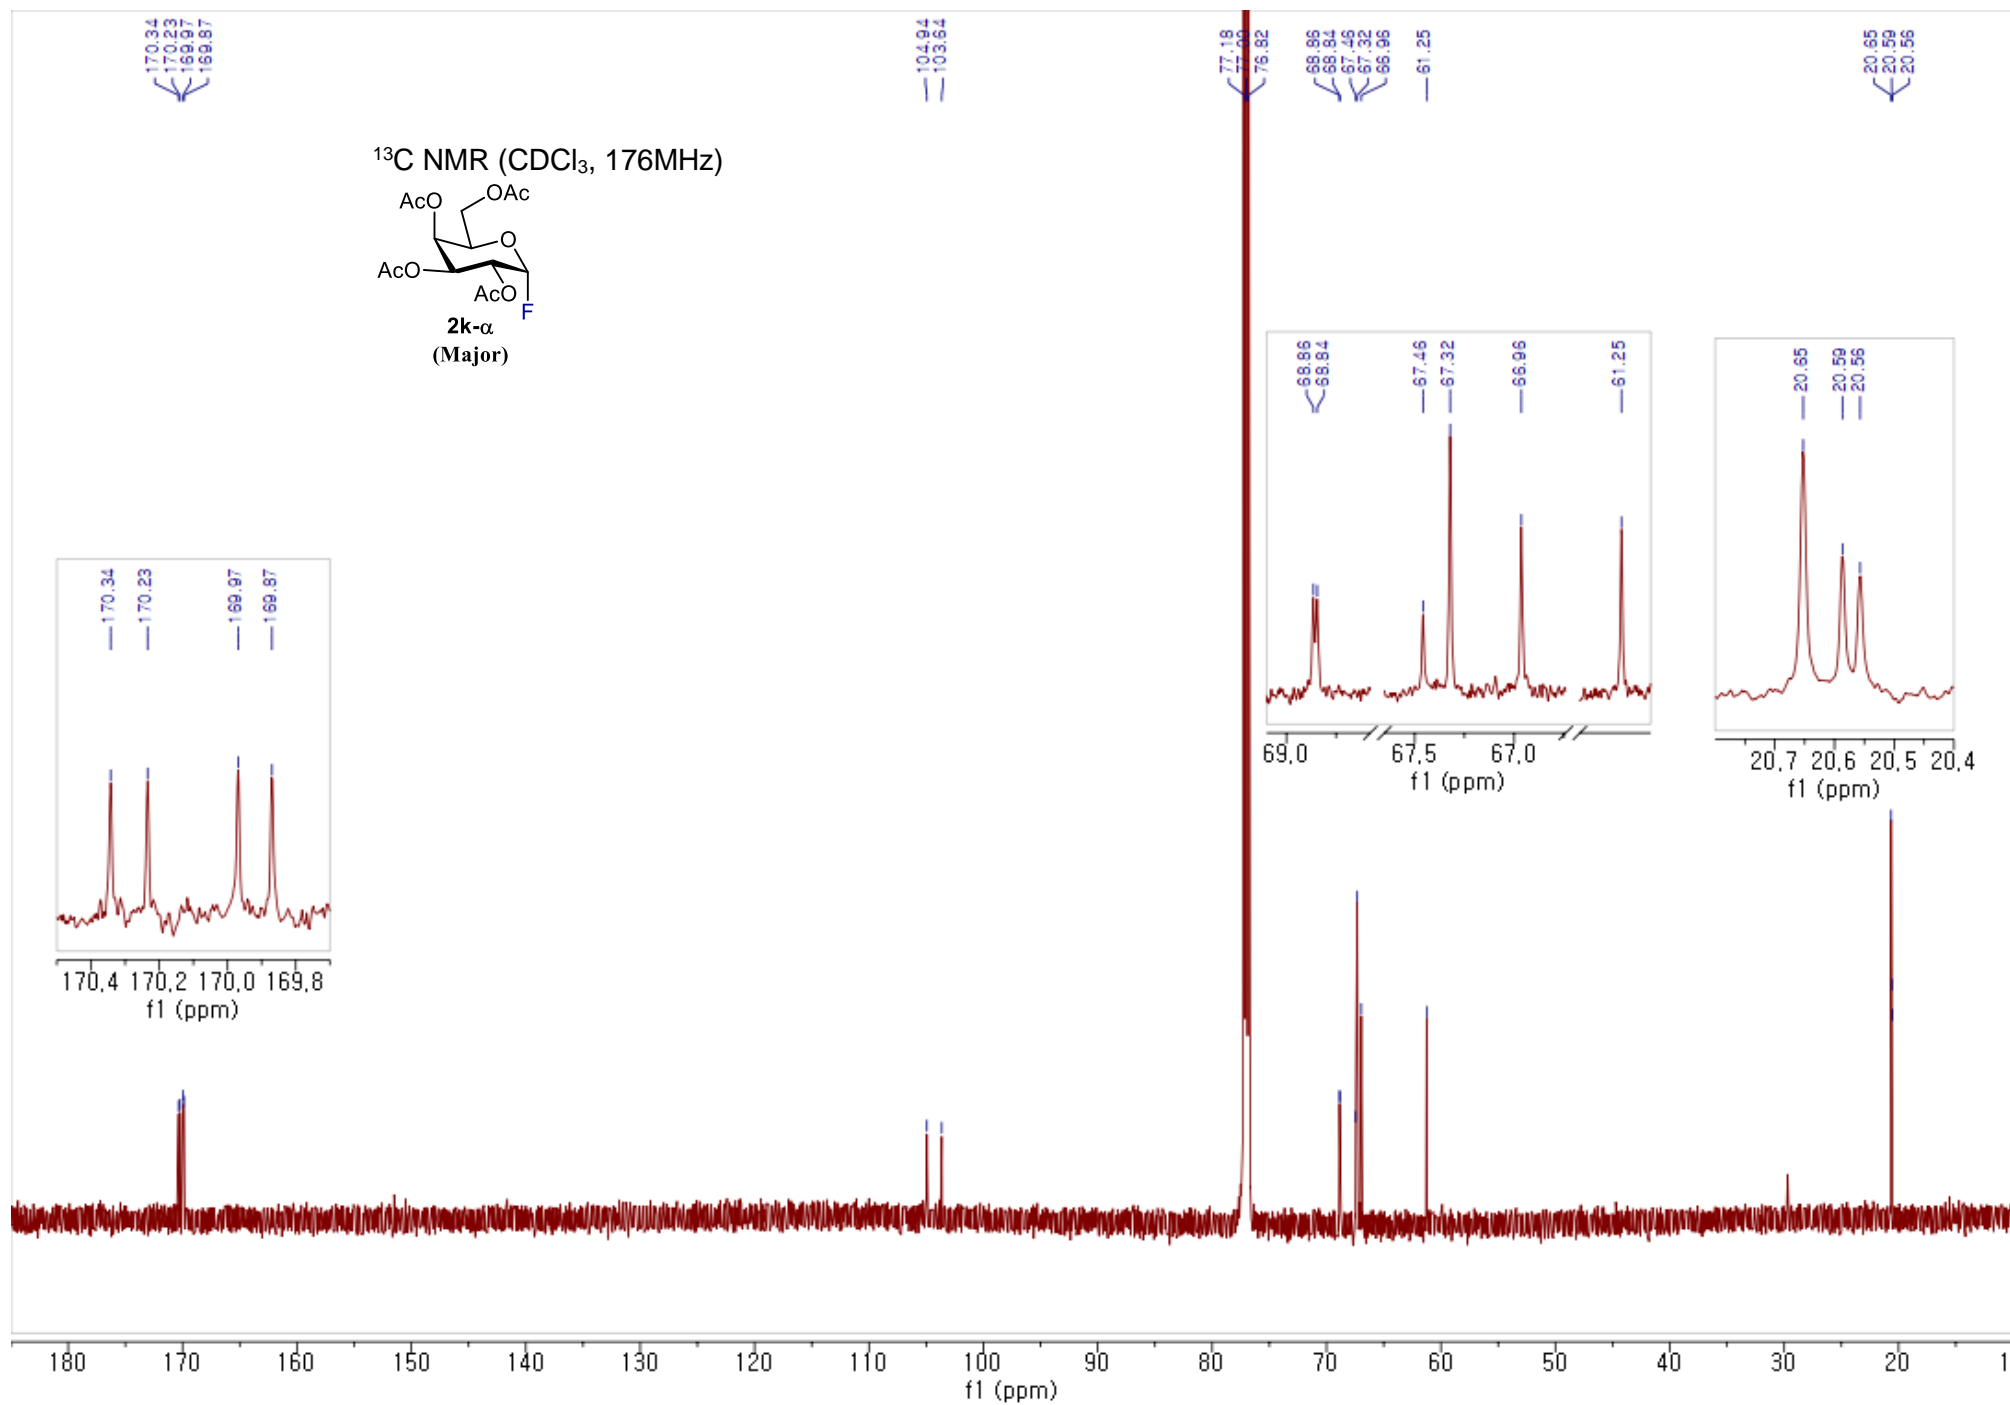

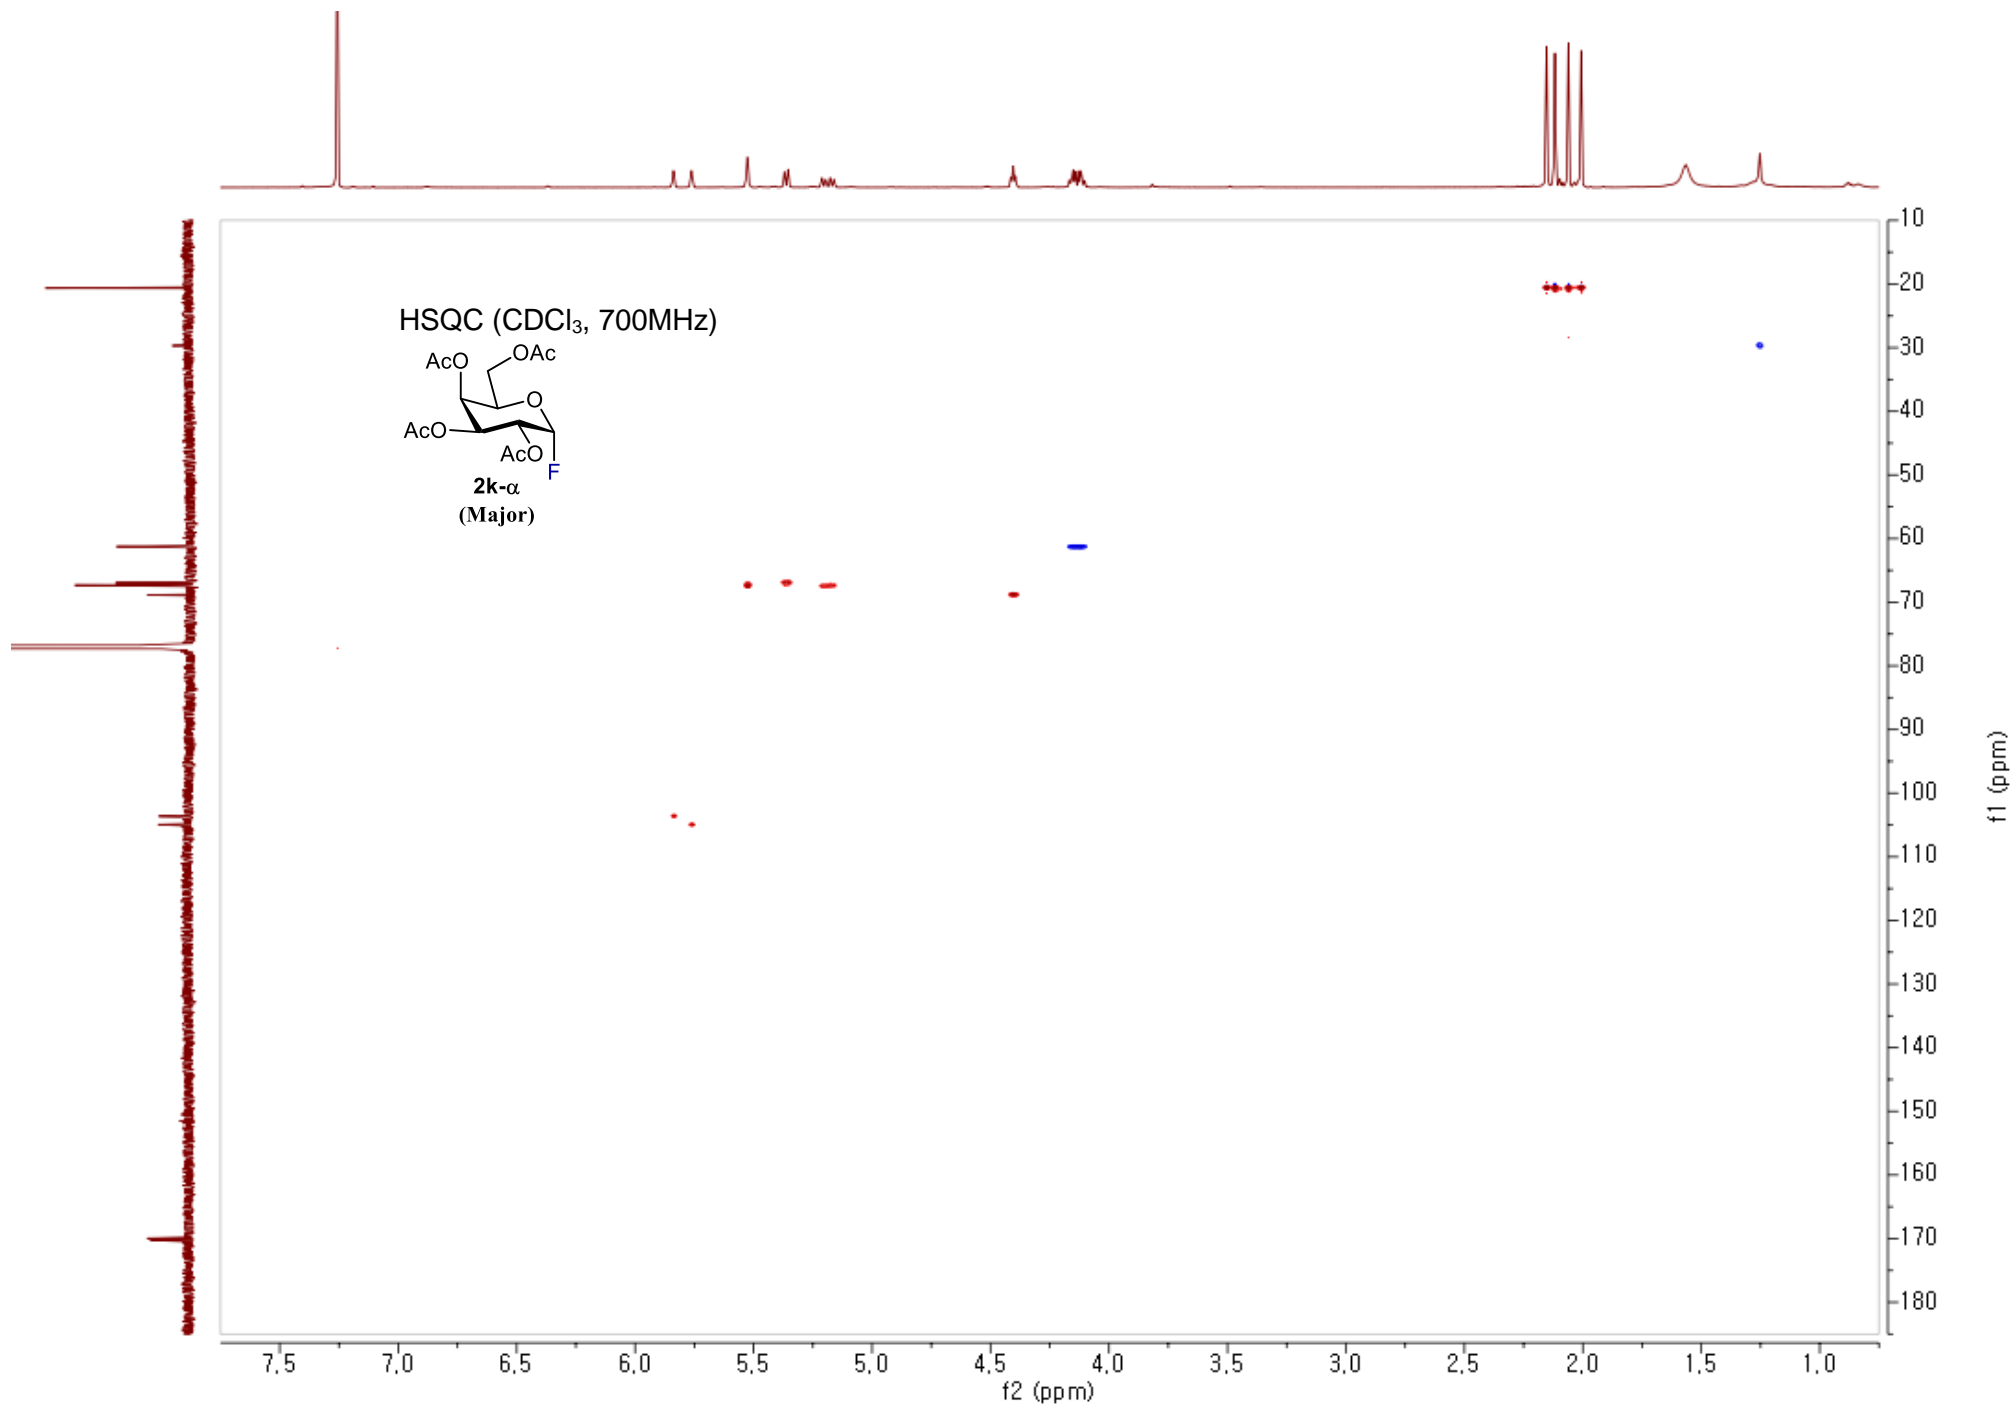

# 2,3,4,6-Tetra-O-acetyl- $\beta$ -D-galactopyranosyl fluoride (2k- $\beta$ , Minor diastereomer)

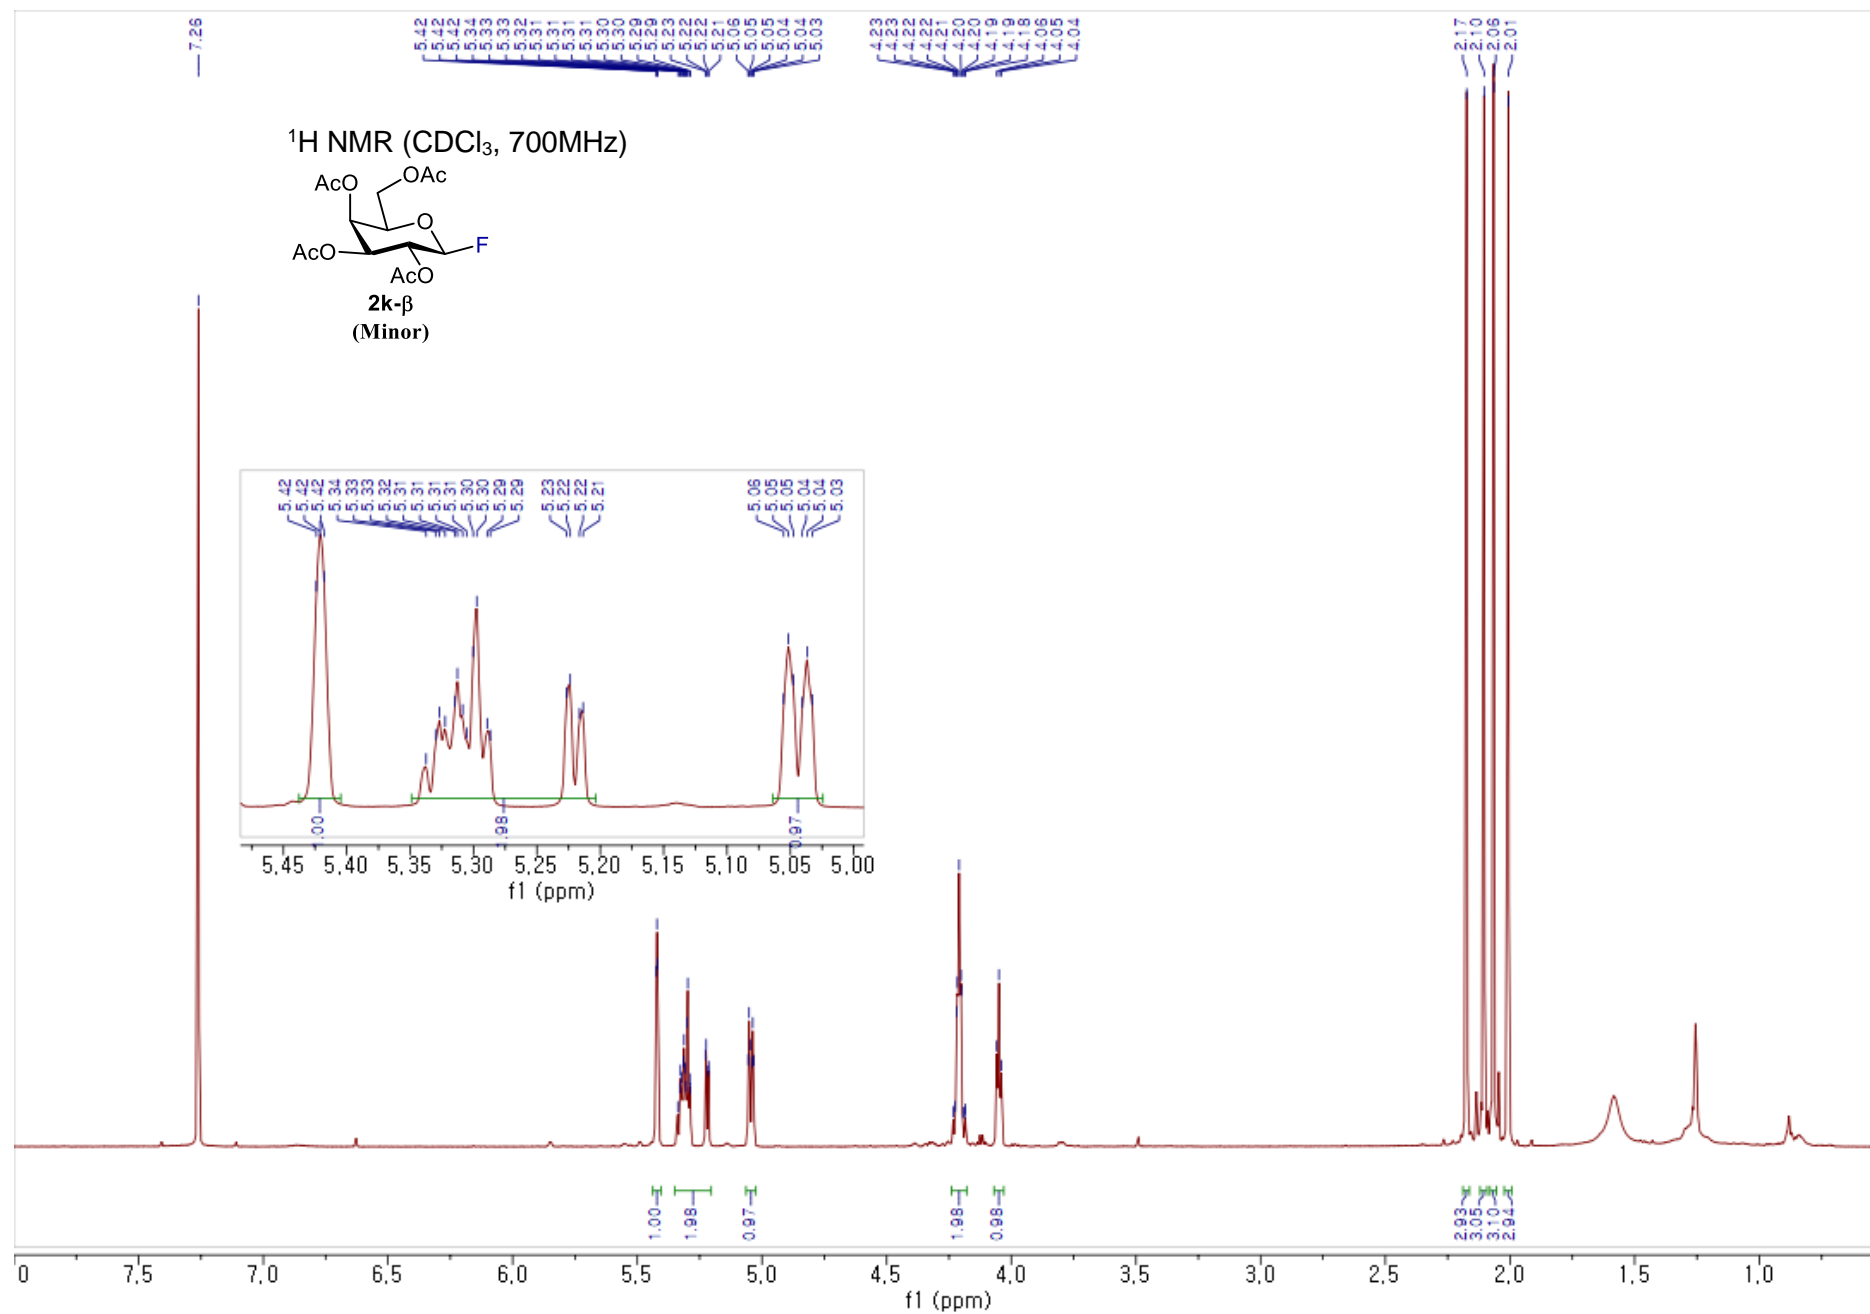

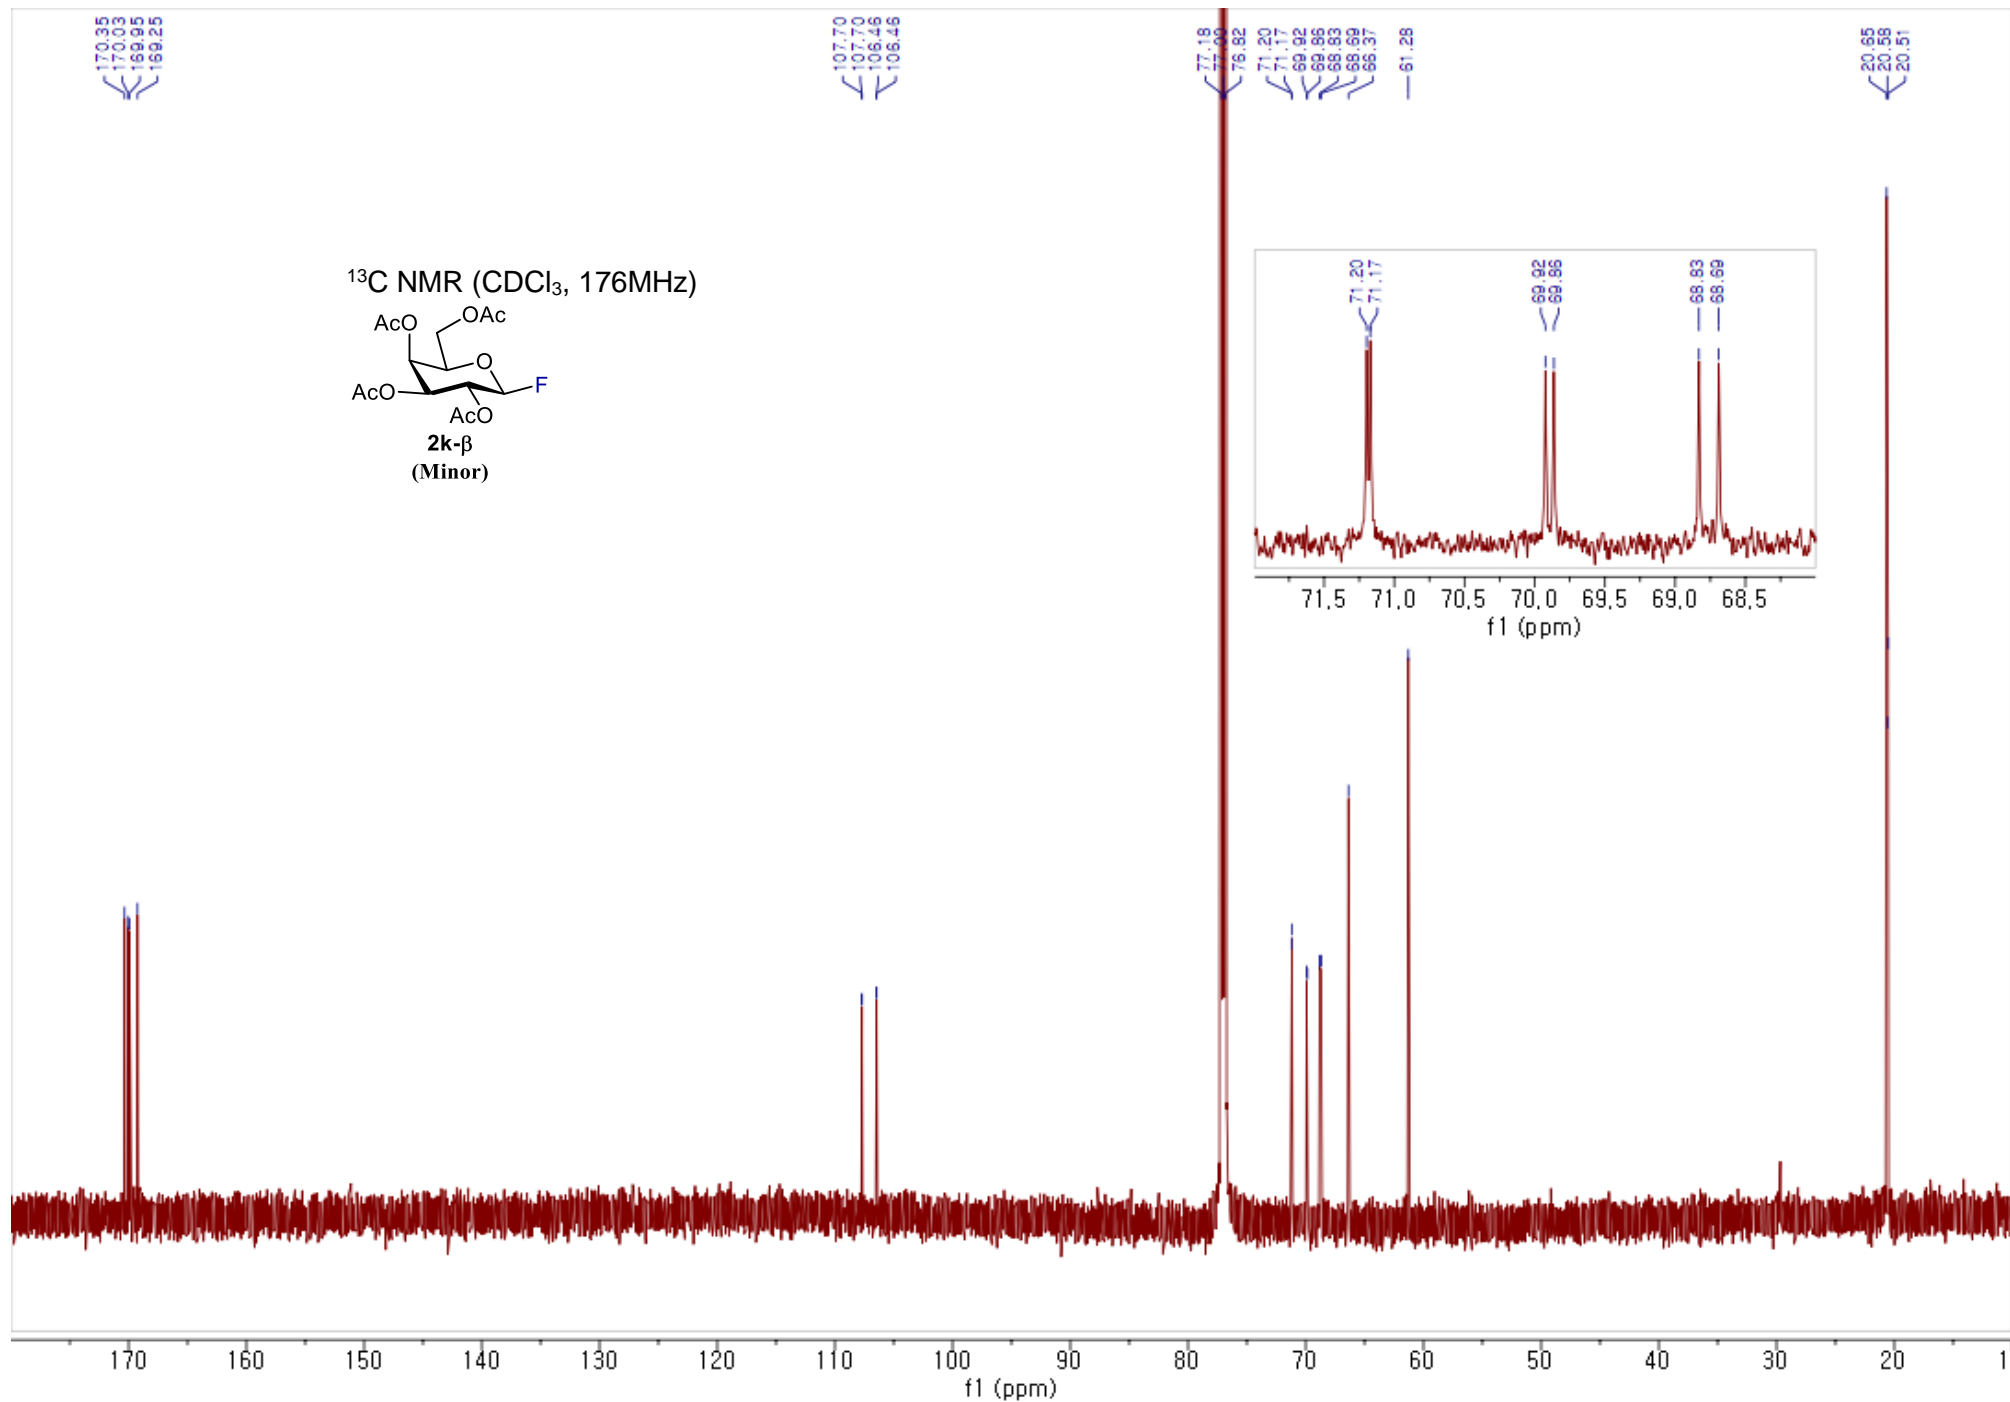



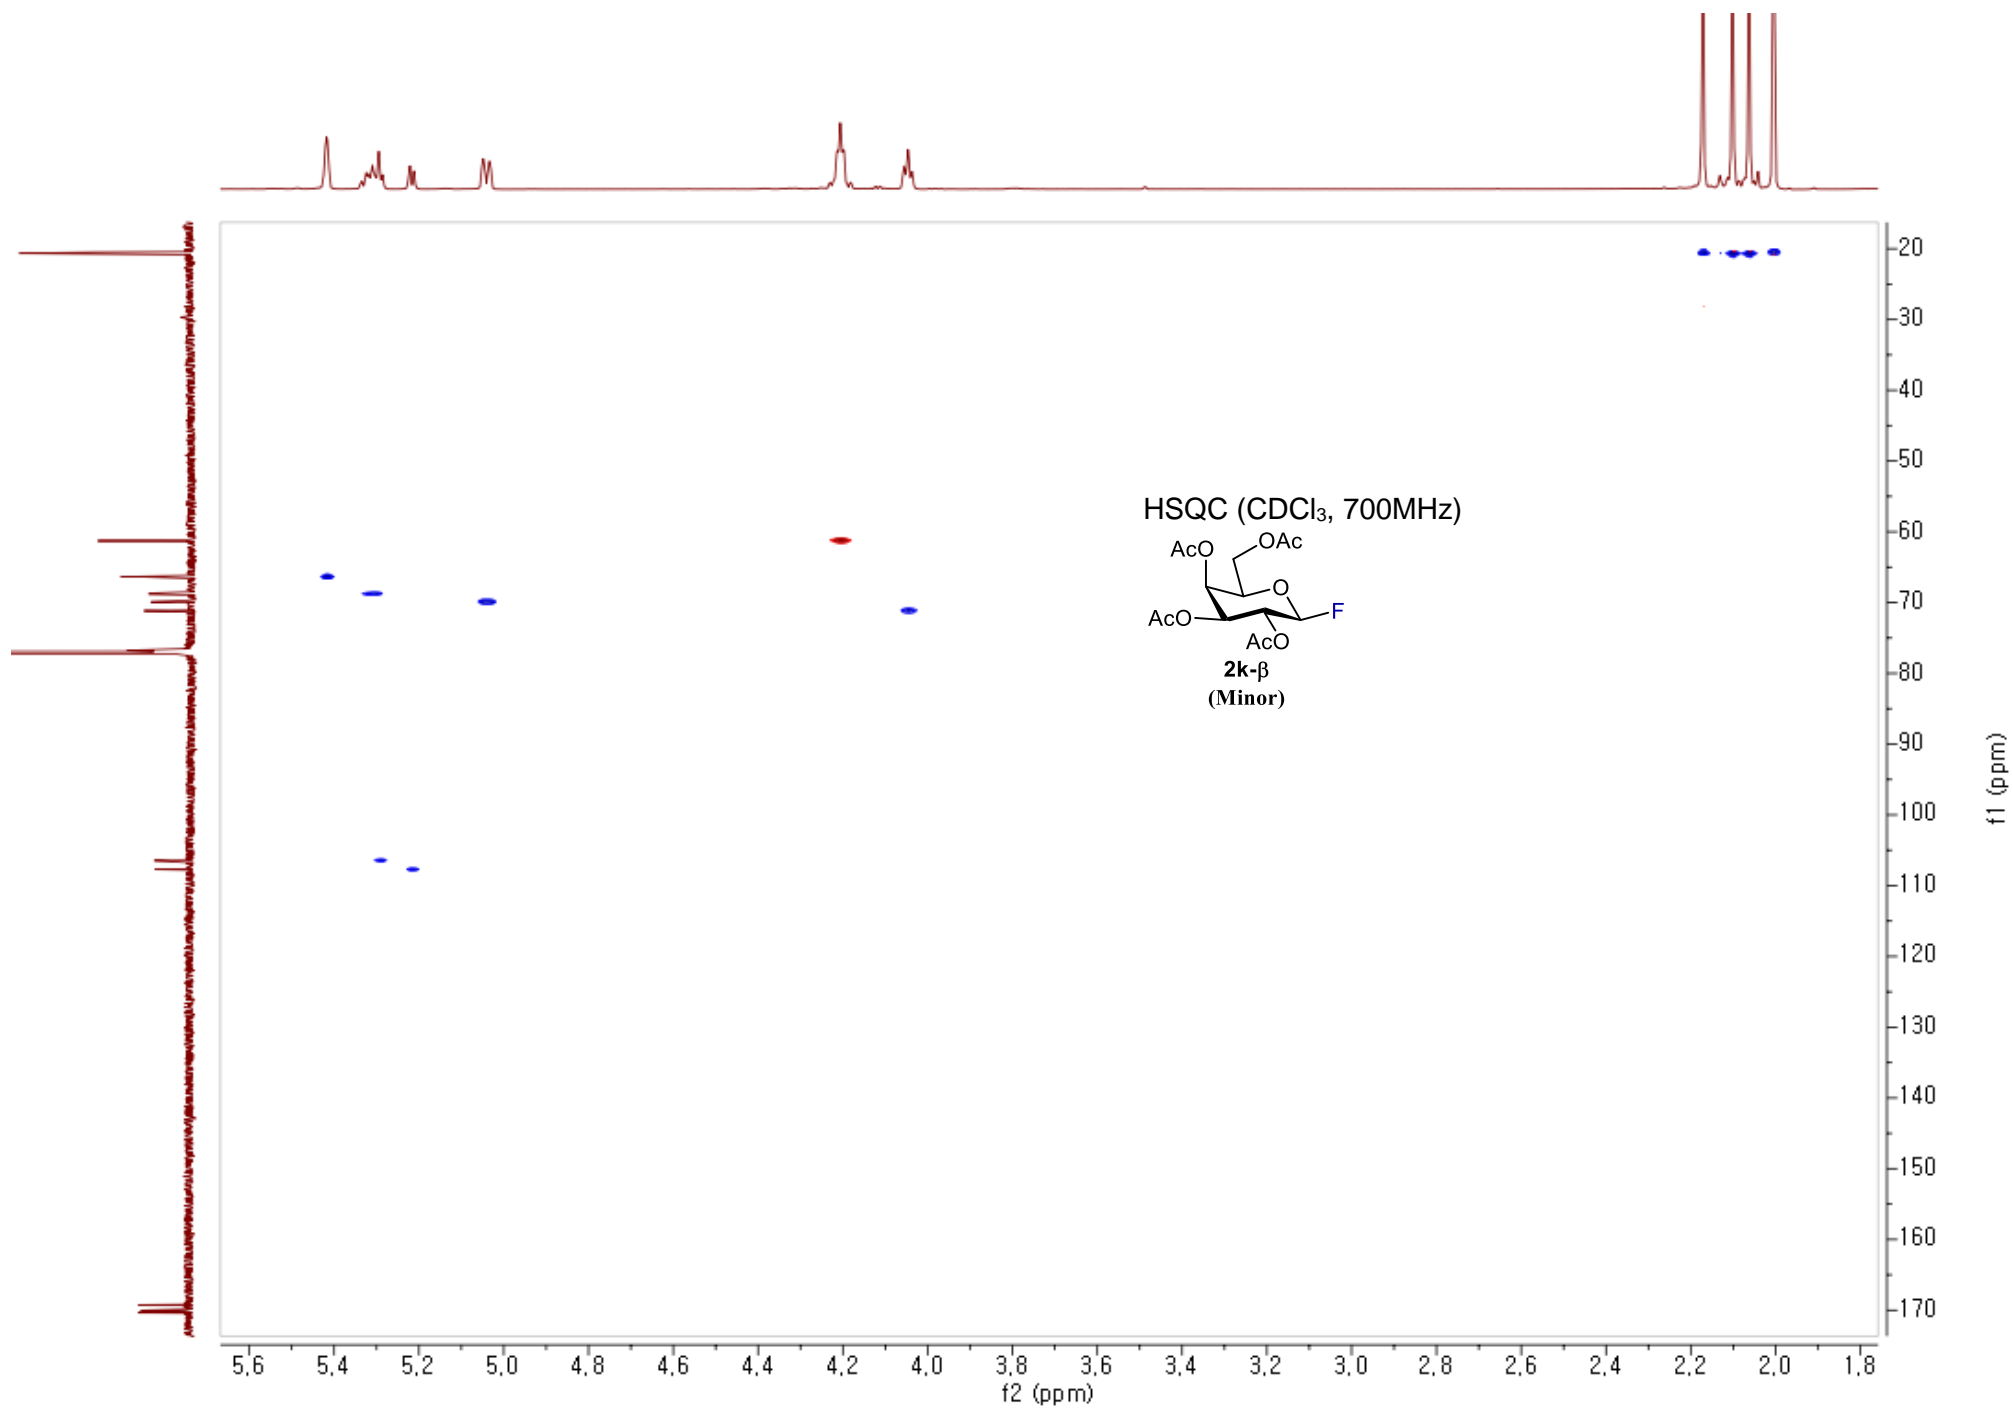

After Work-Up  
<sup>19</sup>F NMR (CDCl<sub>3</sub>, 564 MHz)

141.37  
141.39  
141.46  
141.48

150.71  
150.76  
150.81  
150.85

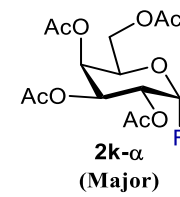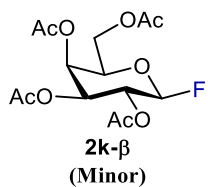

1.00

1.67

37 -138 -139 -140 -141 -142 -143 -144 -145 -146 -147 -148 -149 -150 -151 -152 -153 -154 -155

f1 (ppm)

After Purification  
<sup>19</sup>F NMR (CDCl<sub>3</sub>, 564 MHz)

141.43  
141.46  
141.52  
141.55

150.71  
150.75  
150.80  
150.85

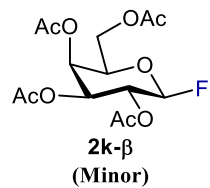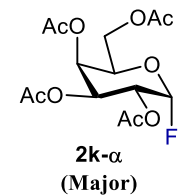

0.0 -140.5 -141.0 -141.5 -142.0 -142.5 // -149.5 -150.0 -150.5 -151.0 -151.5 -152.0 -152.5 -15

f1 (ppm)

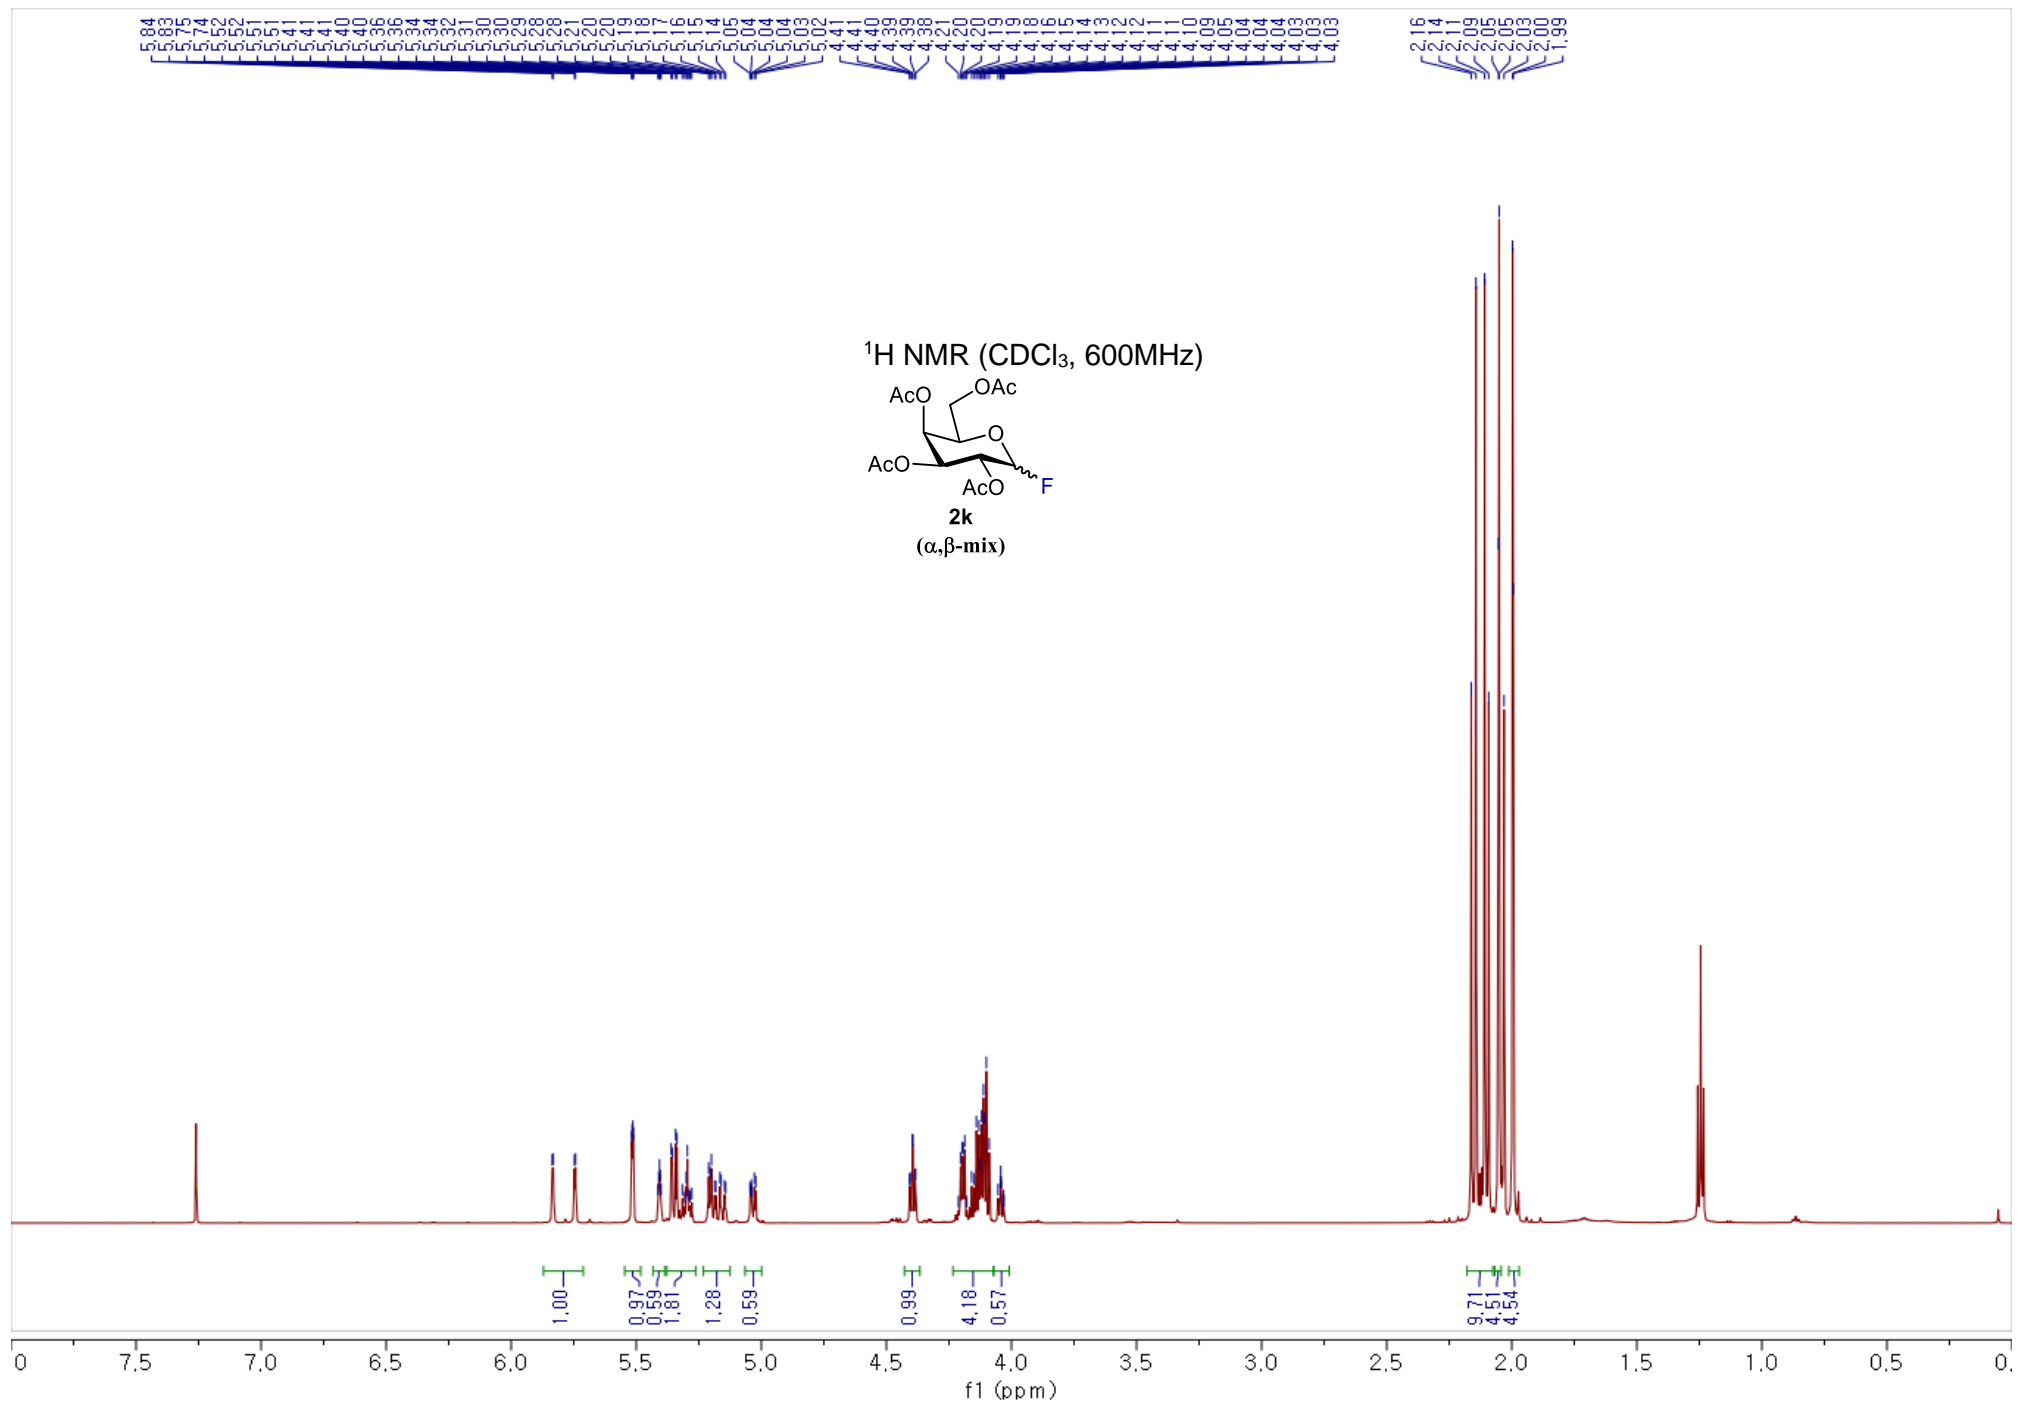

# 2,3,4,6-Tetra-O-acetyl- $\beta$ -D-glucopyranosyl fluoride (2I- $\beta$ , Major diastereomer)

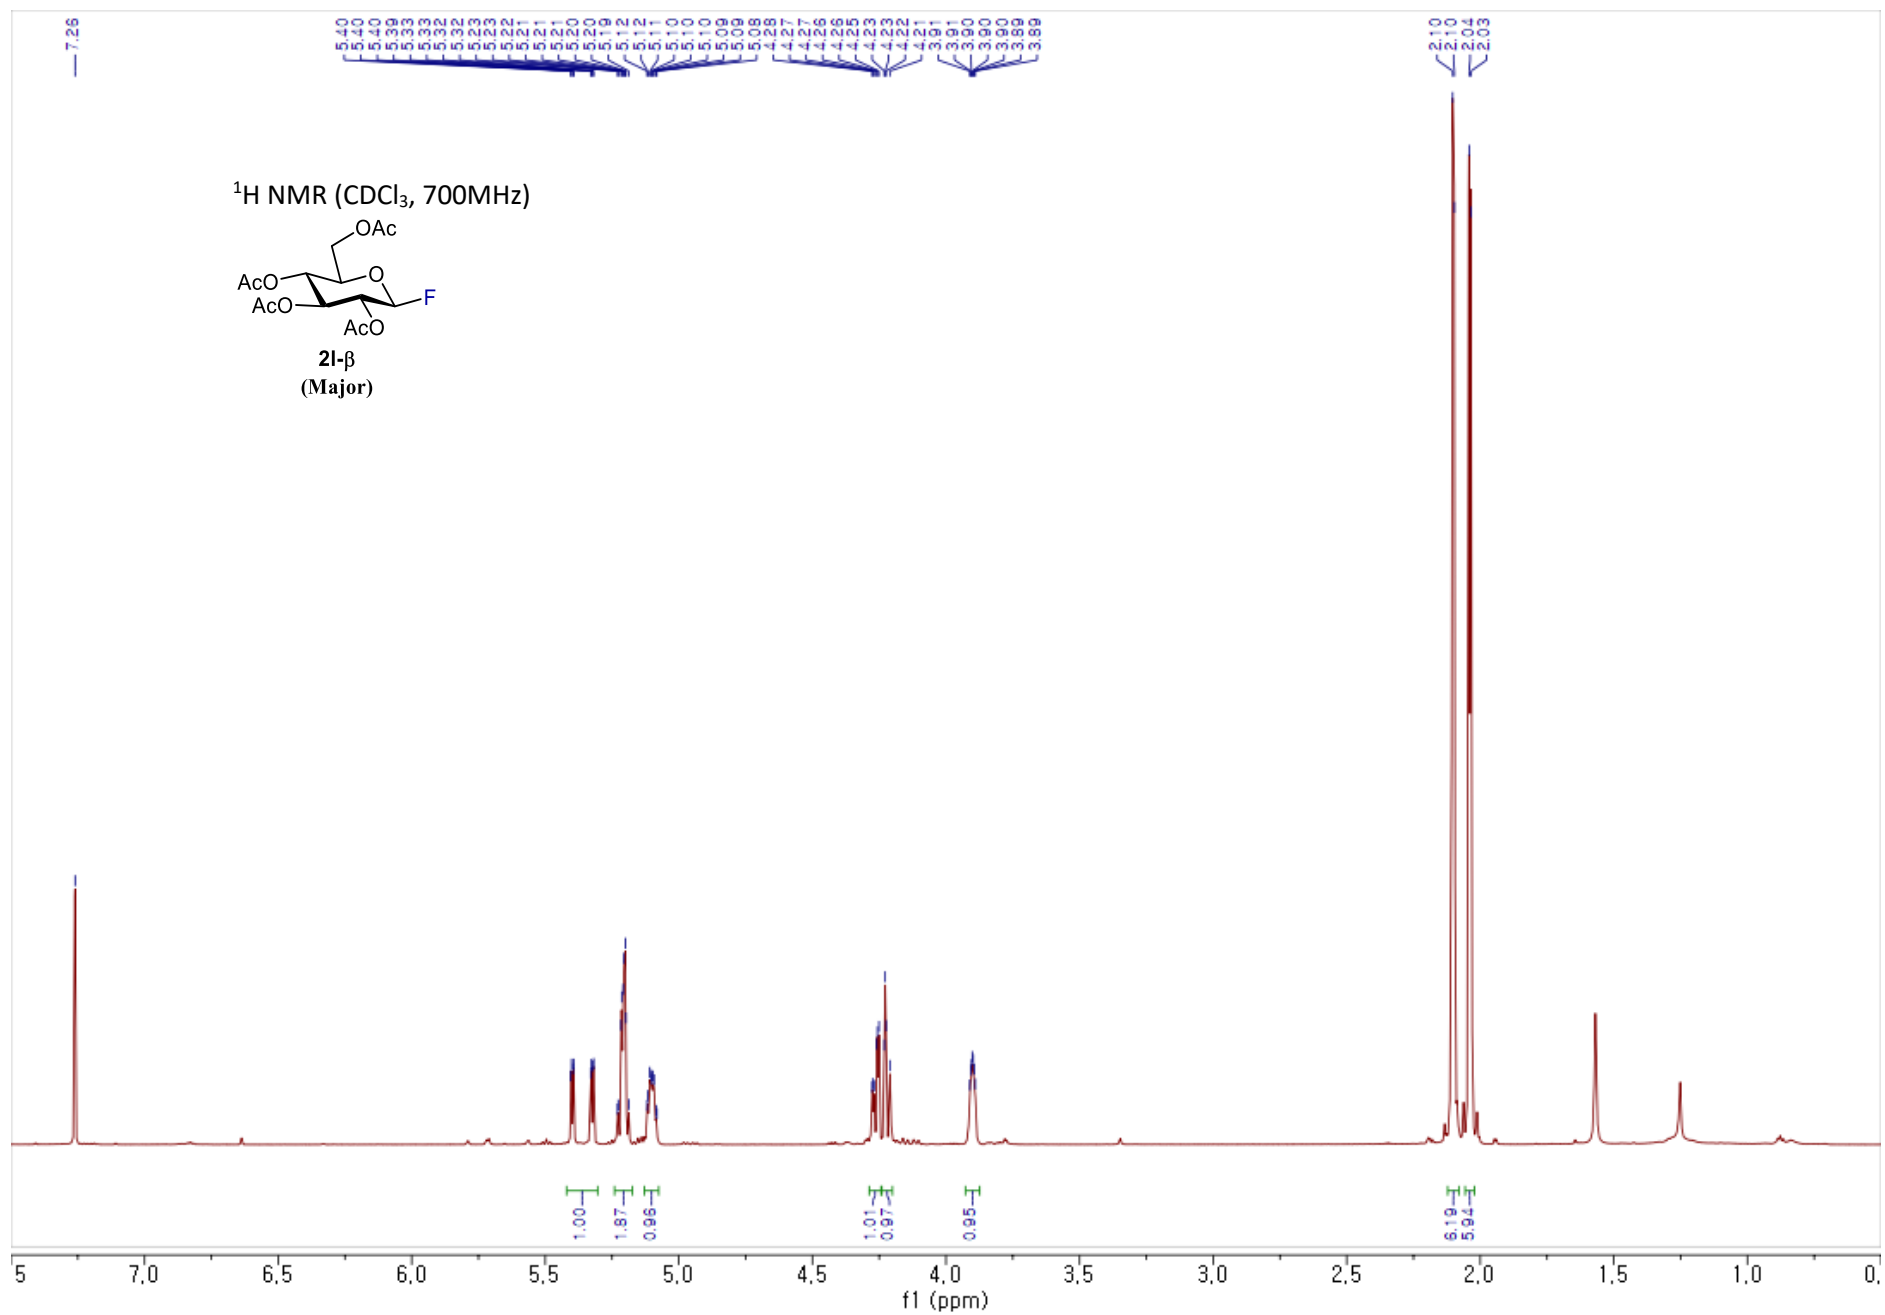

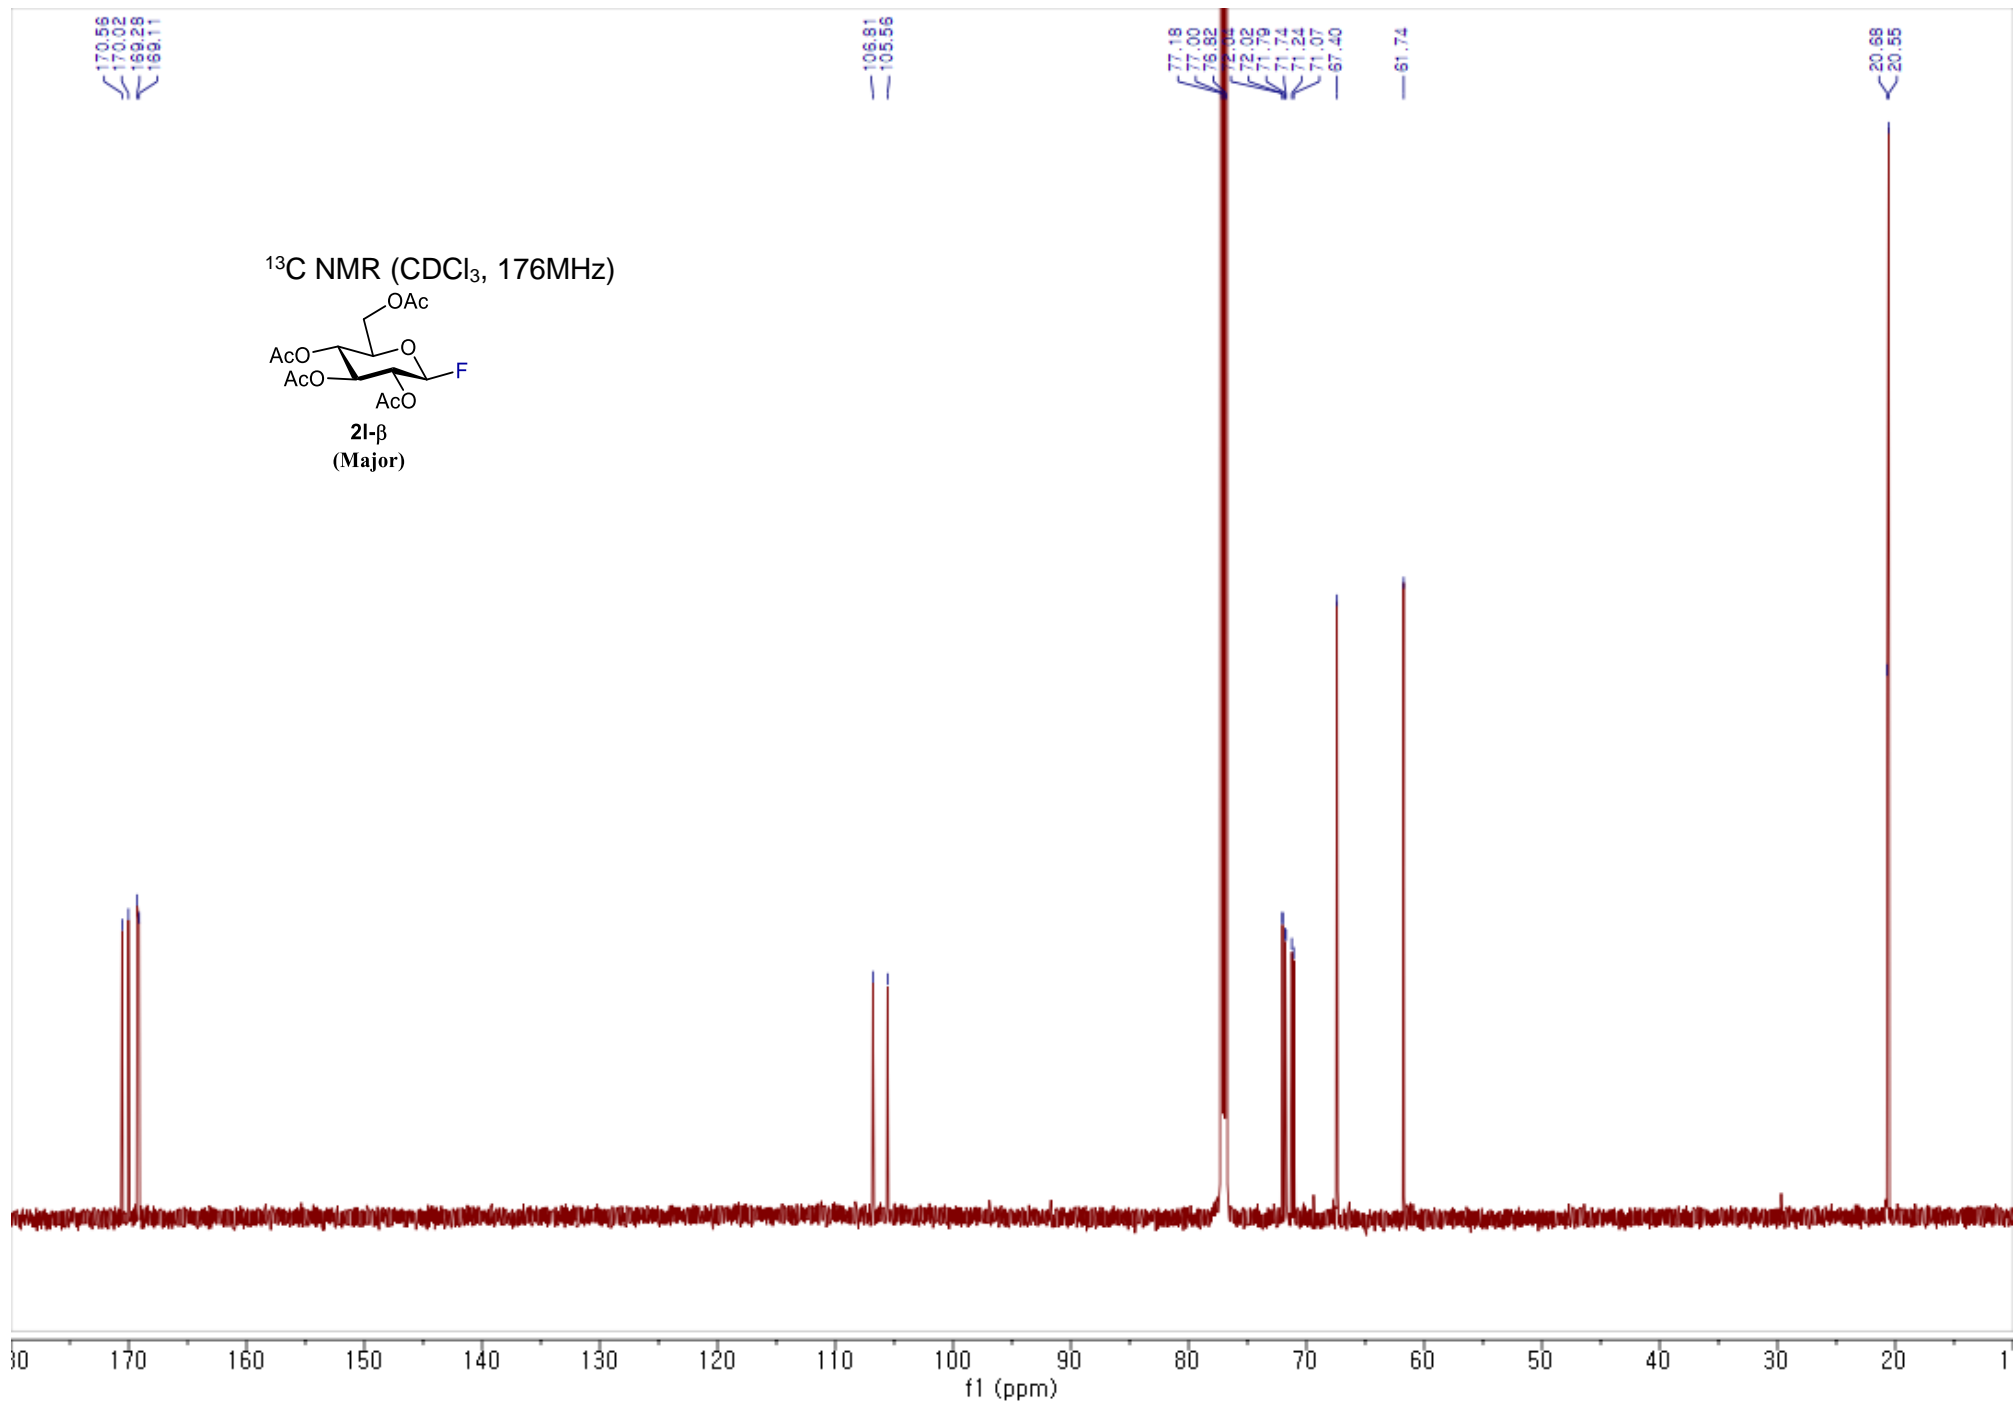

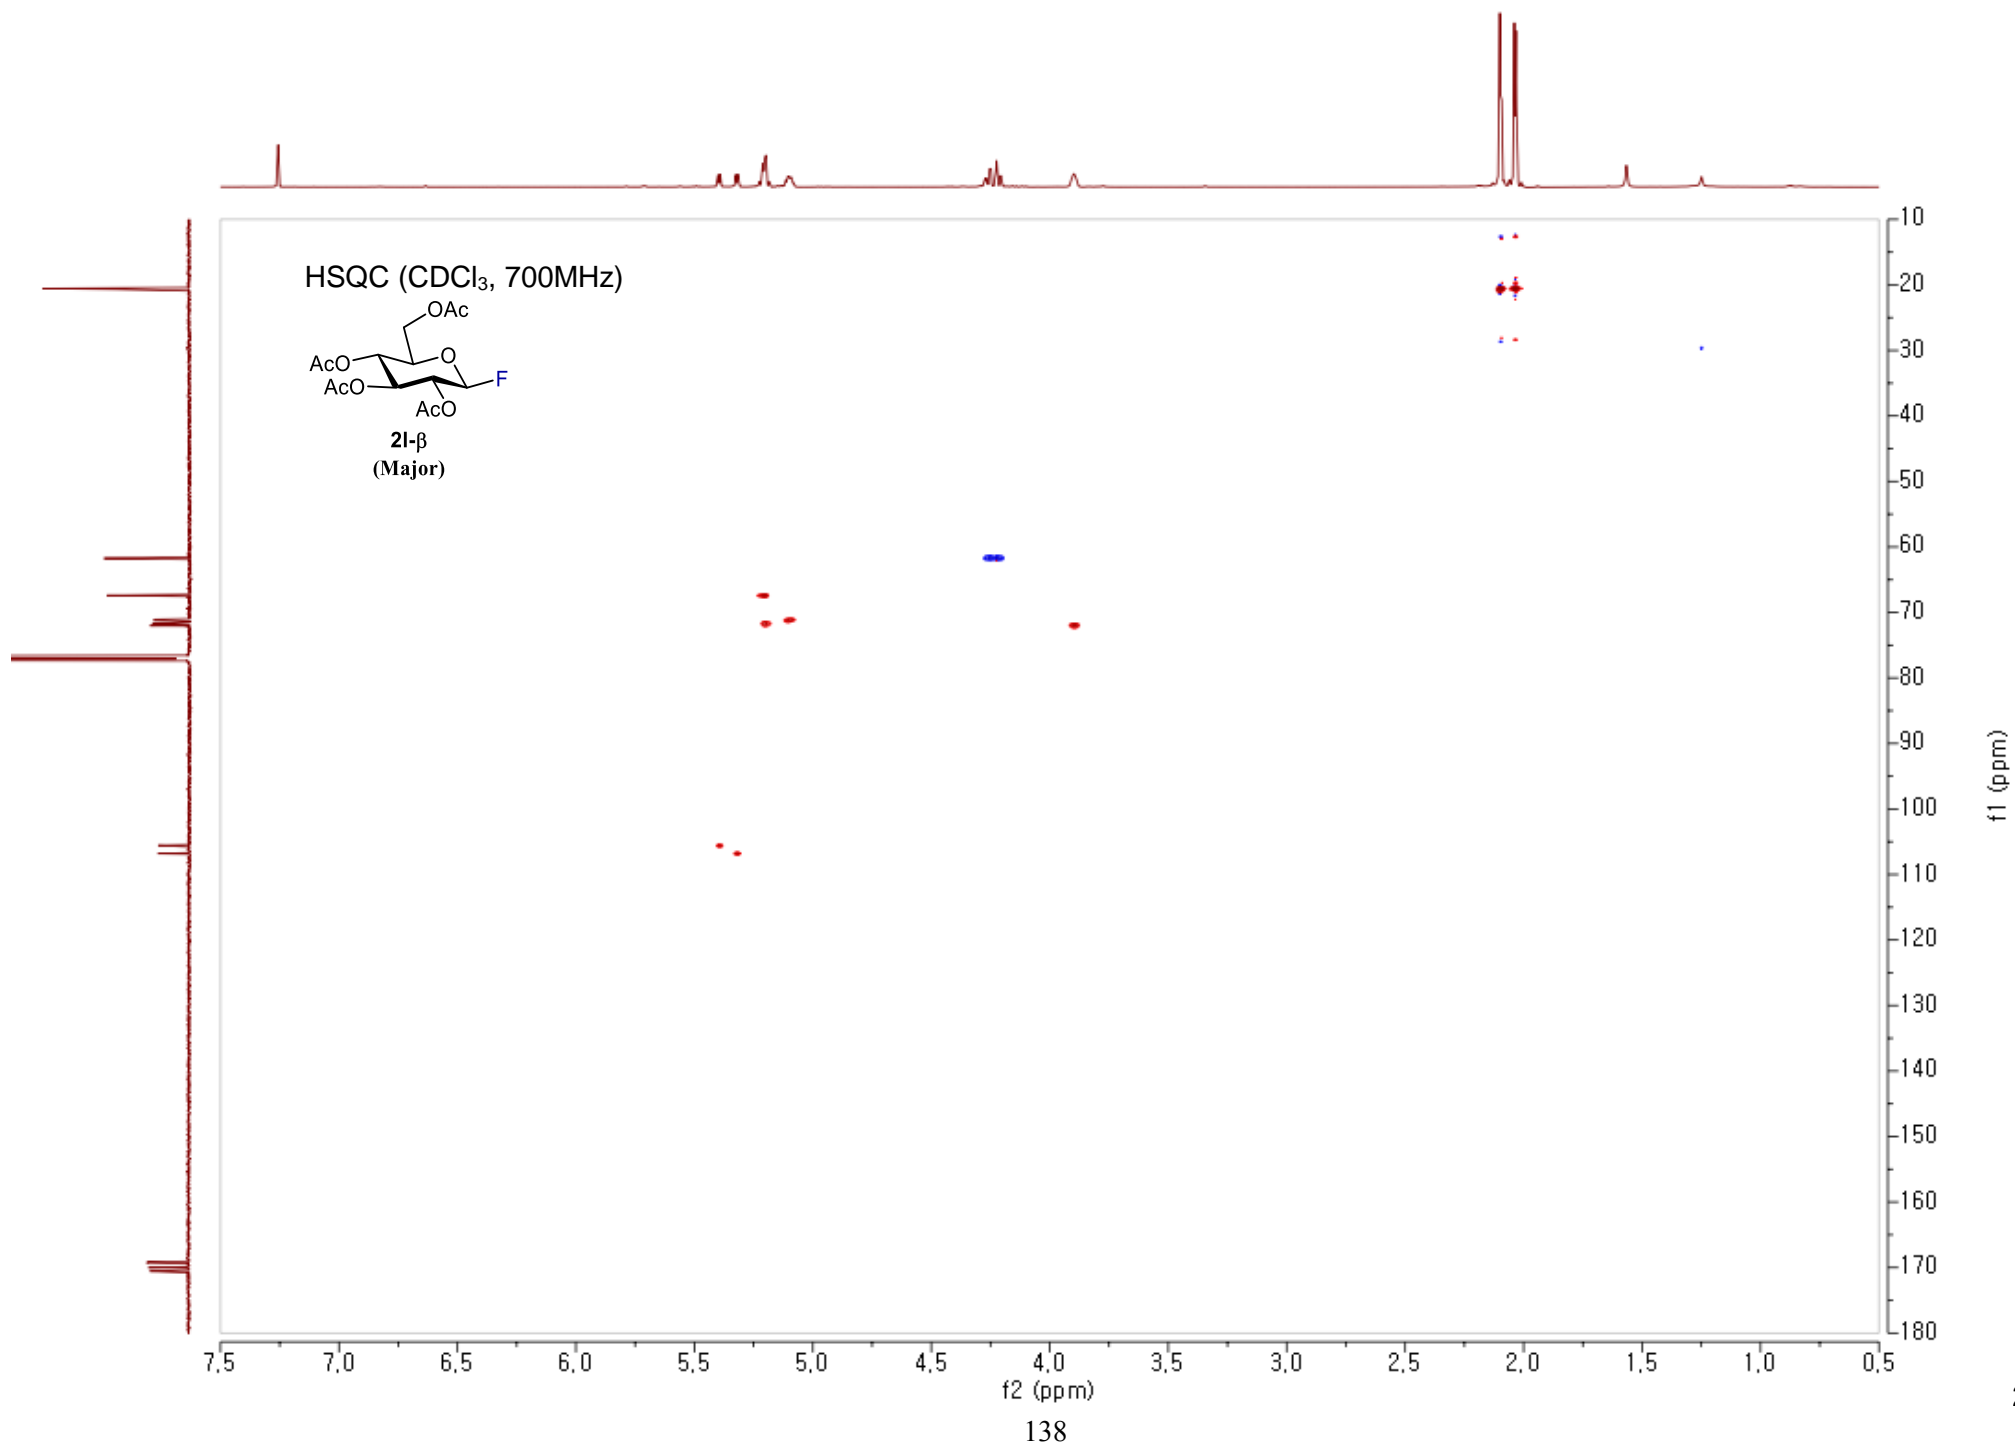

2,3,4,6-Tetra-O-acetyl- $\alpha$ -D-glucopyranosyl fluoride (2I- $\alpha$ , Minor diastereomer)

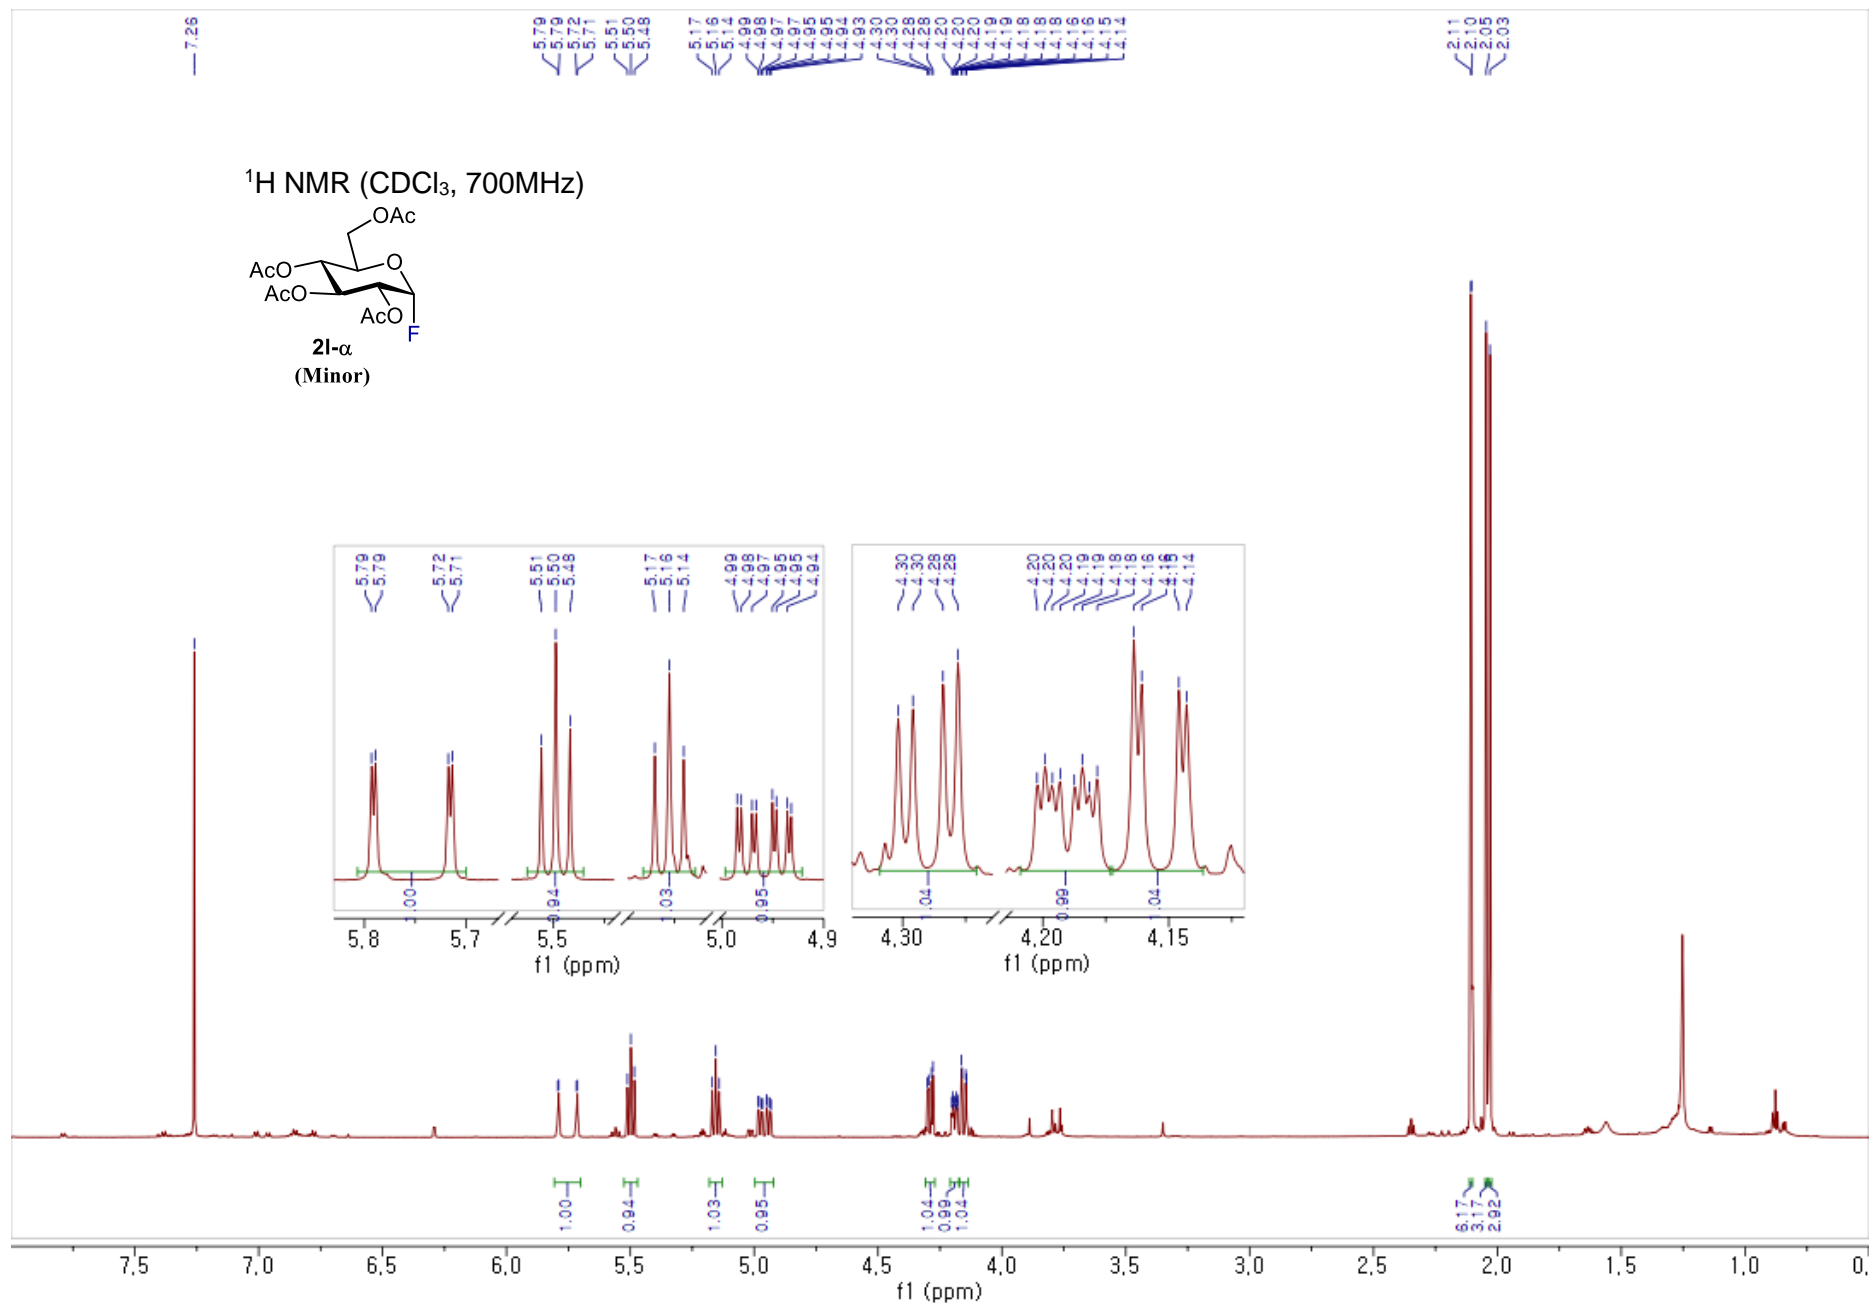



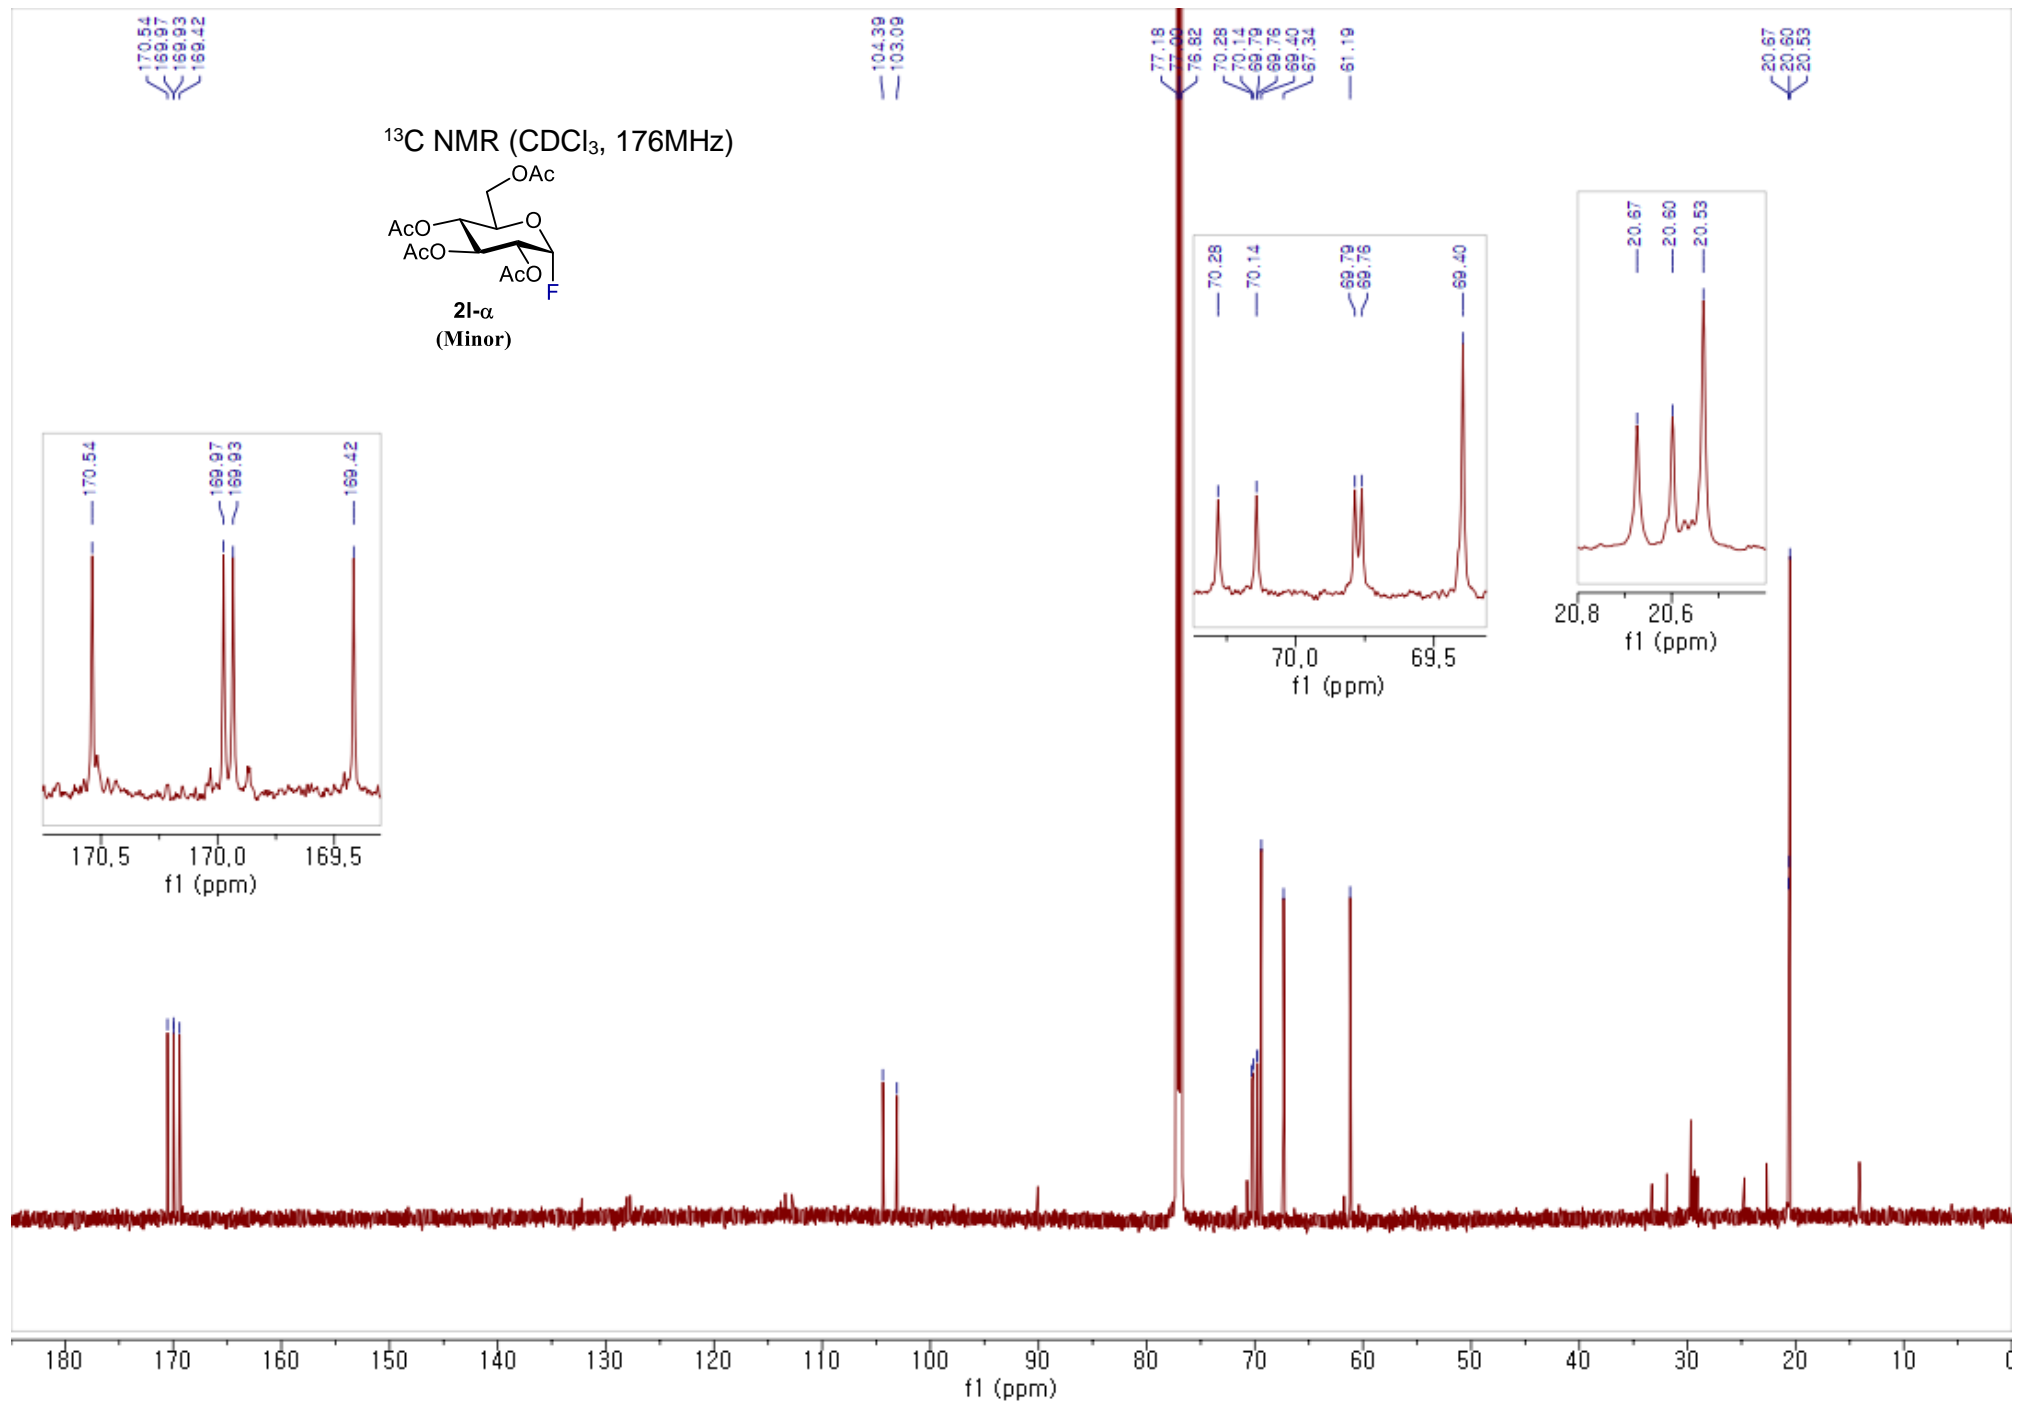

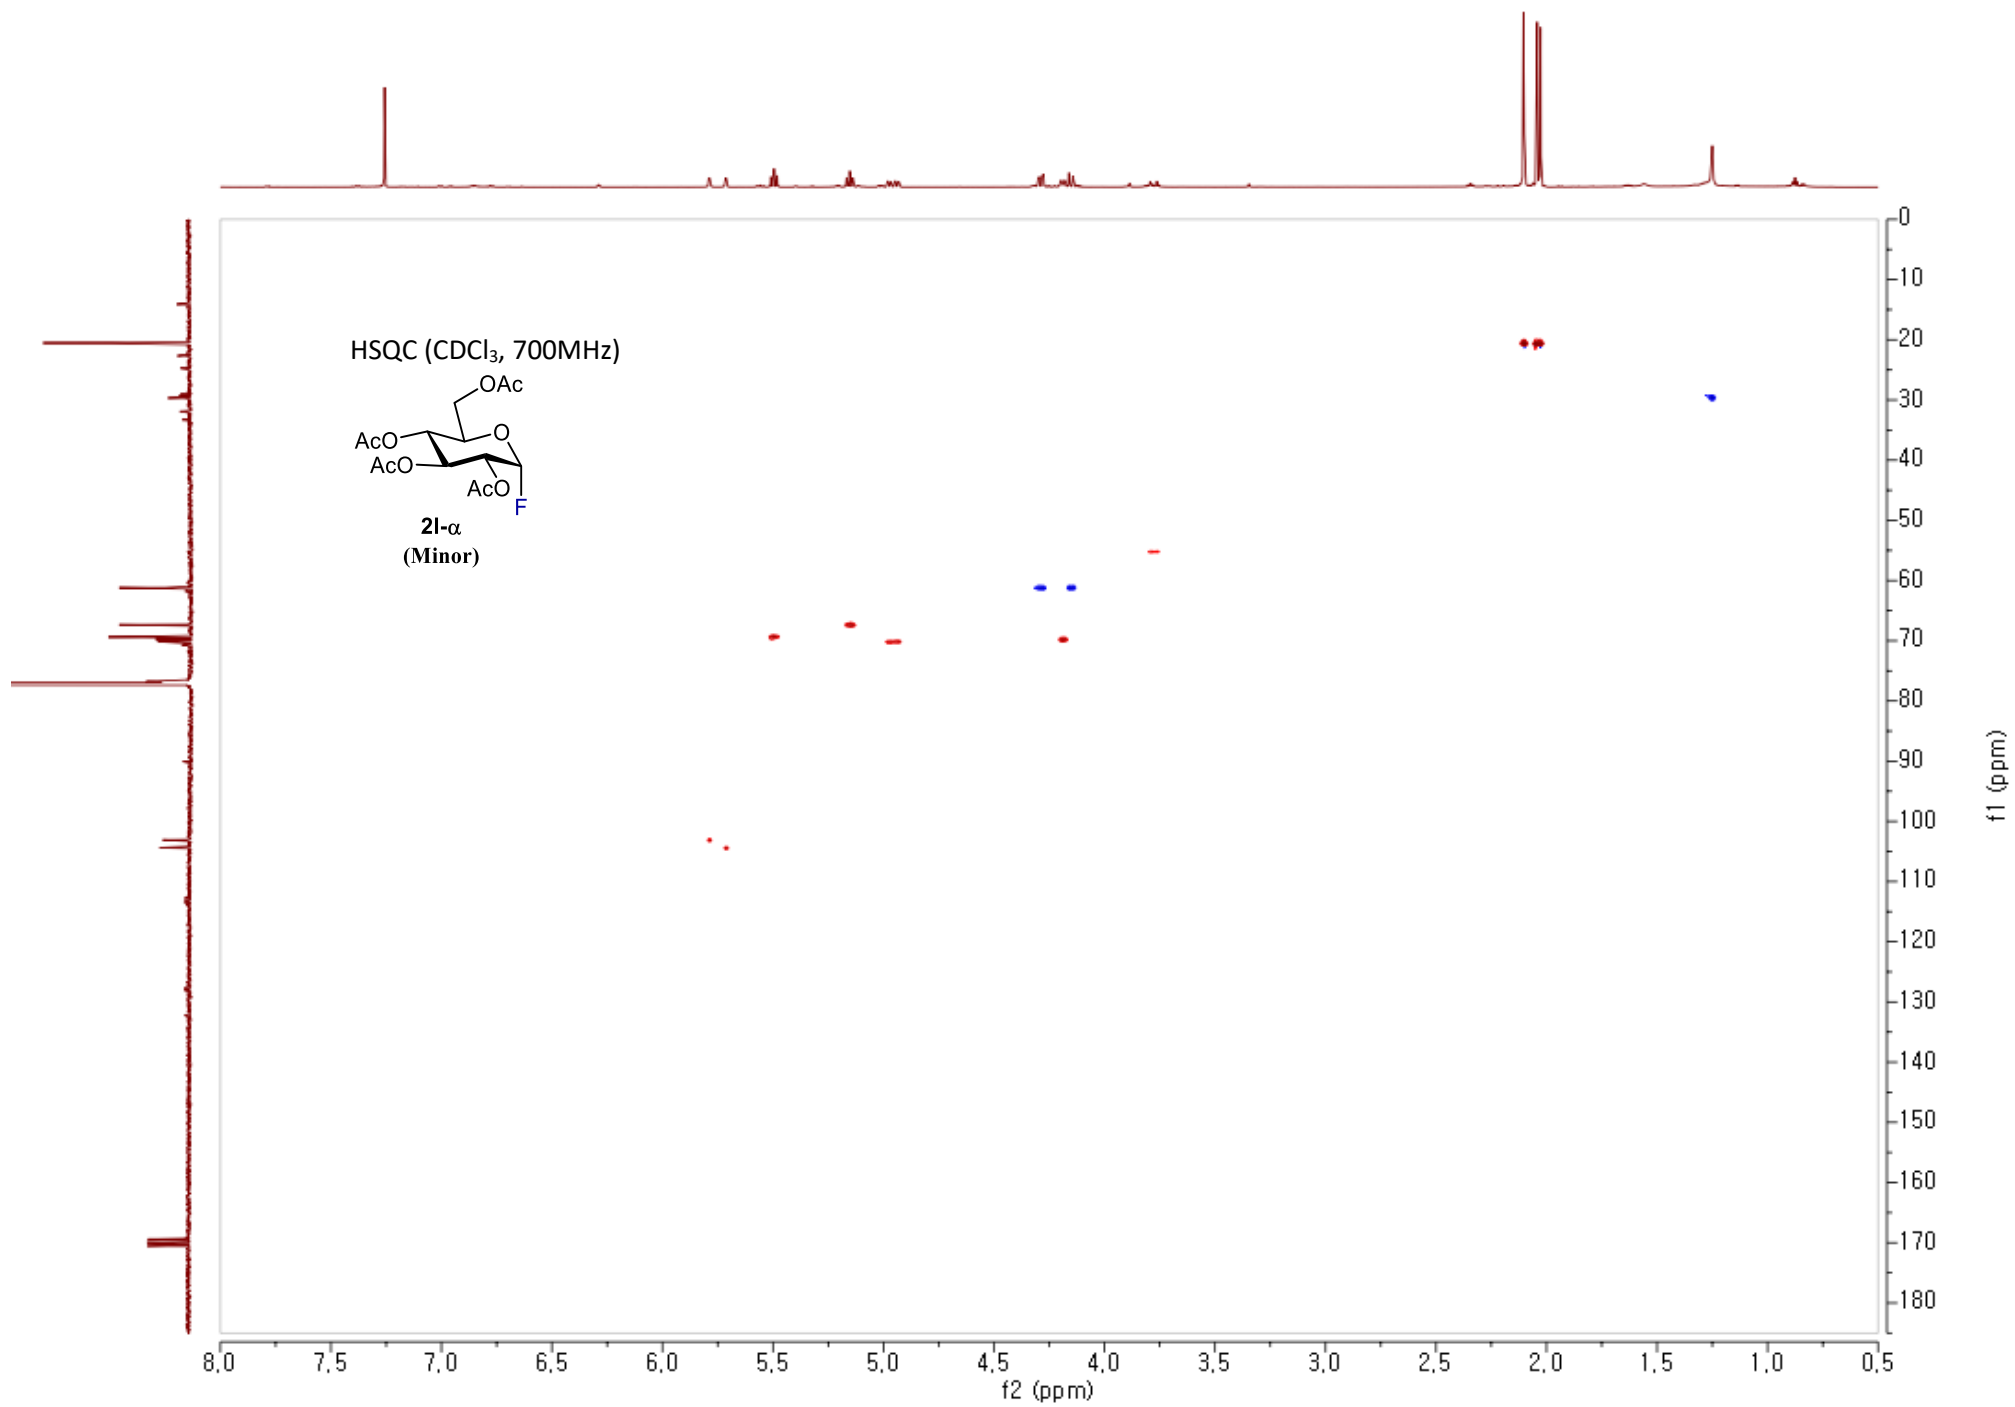

After Work-Up  
<sup>19</sup>F NMR (CDCl<sub>3</sub>, 564MHz)

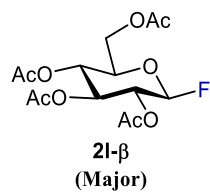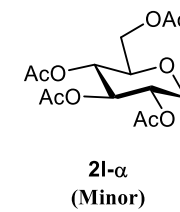

137.18  
137.20  
137.27  
137.29

149.69  
149.73  
149.78  
149.82

2.63

1.00

31 -132 -133 -134 -135 -136 -137 -138 -139 -140 -141 -142 -143 -144 -145 -146 -147 -148 -149 -150 -151 -152 -153 -154 -155

f1 (ppm)

After Purification  
<sup>19</sup>F NMR (CDCl<sub>3</sub>, 564MHz)

137.08  
137.10  
137.17  
137.19

149.69  
149.73  
149.78  
149.89

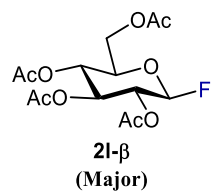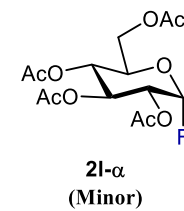

2.49

1.00

31 -132 -133 -134 -135 -136 -137 -138 -139 -140 -141 -142 -143 -144 -145 -146 -147 -148 -149 -150 -151 -152 -153 -154 -155  
f1 (ppm)

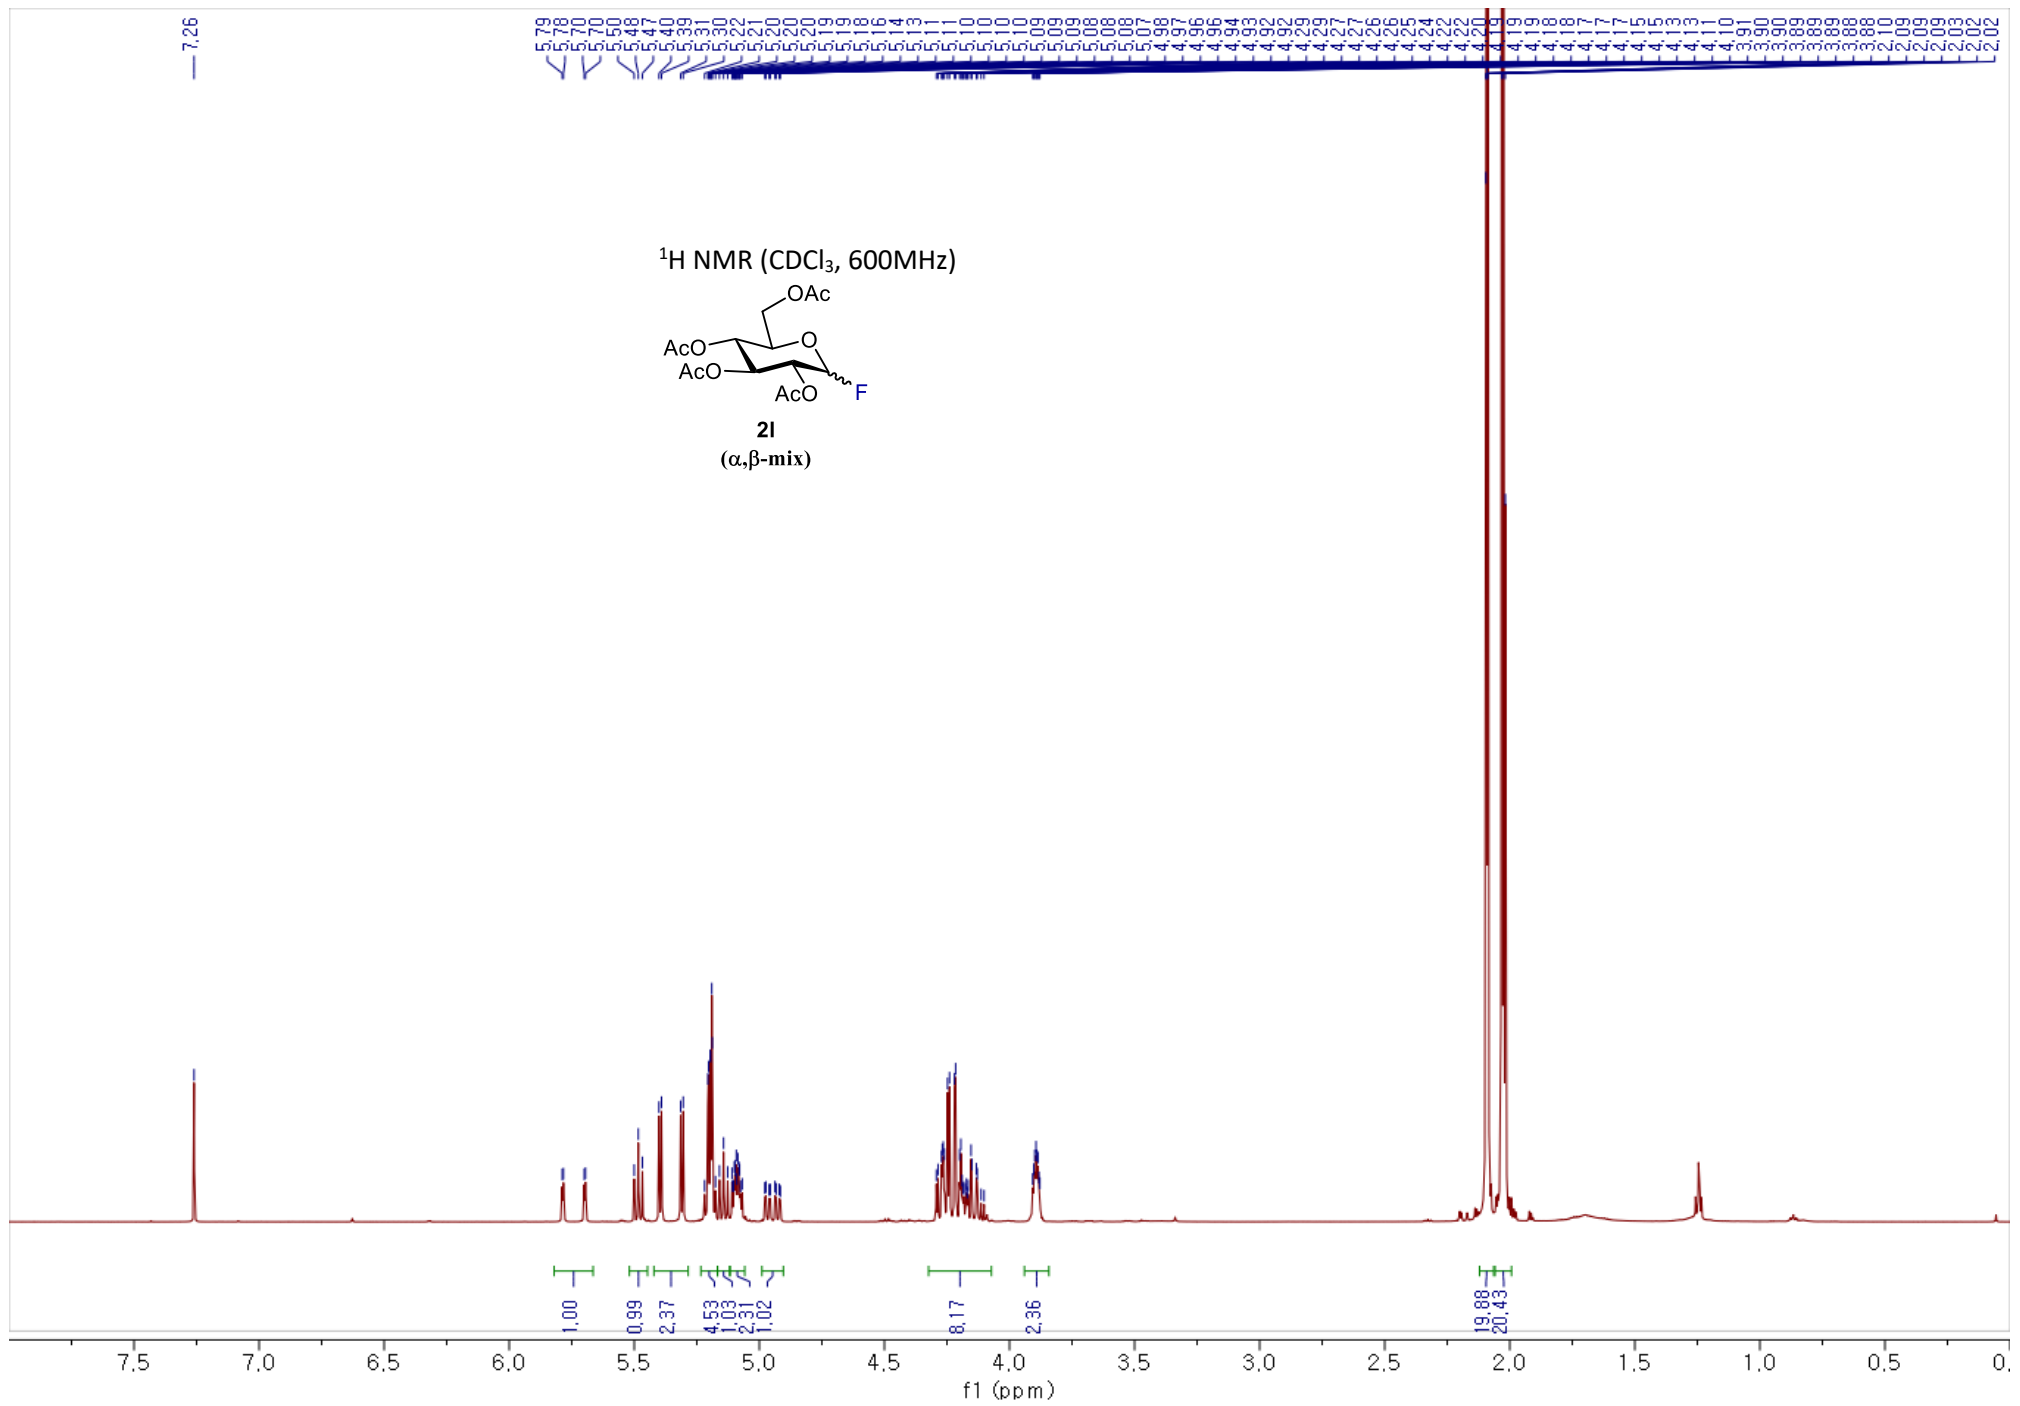

2,3,4,6-Tetra-O-acetyl- $\alpha$ -D-mannopyranosyl fluoride (2m- $\alpha$ , Major diastereomer)

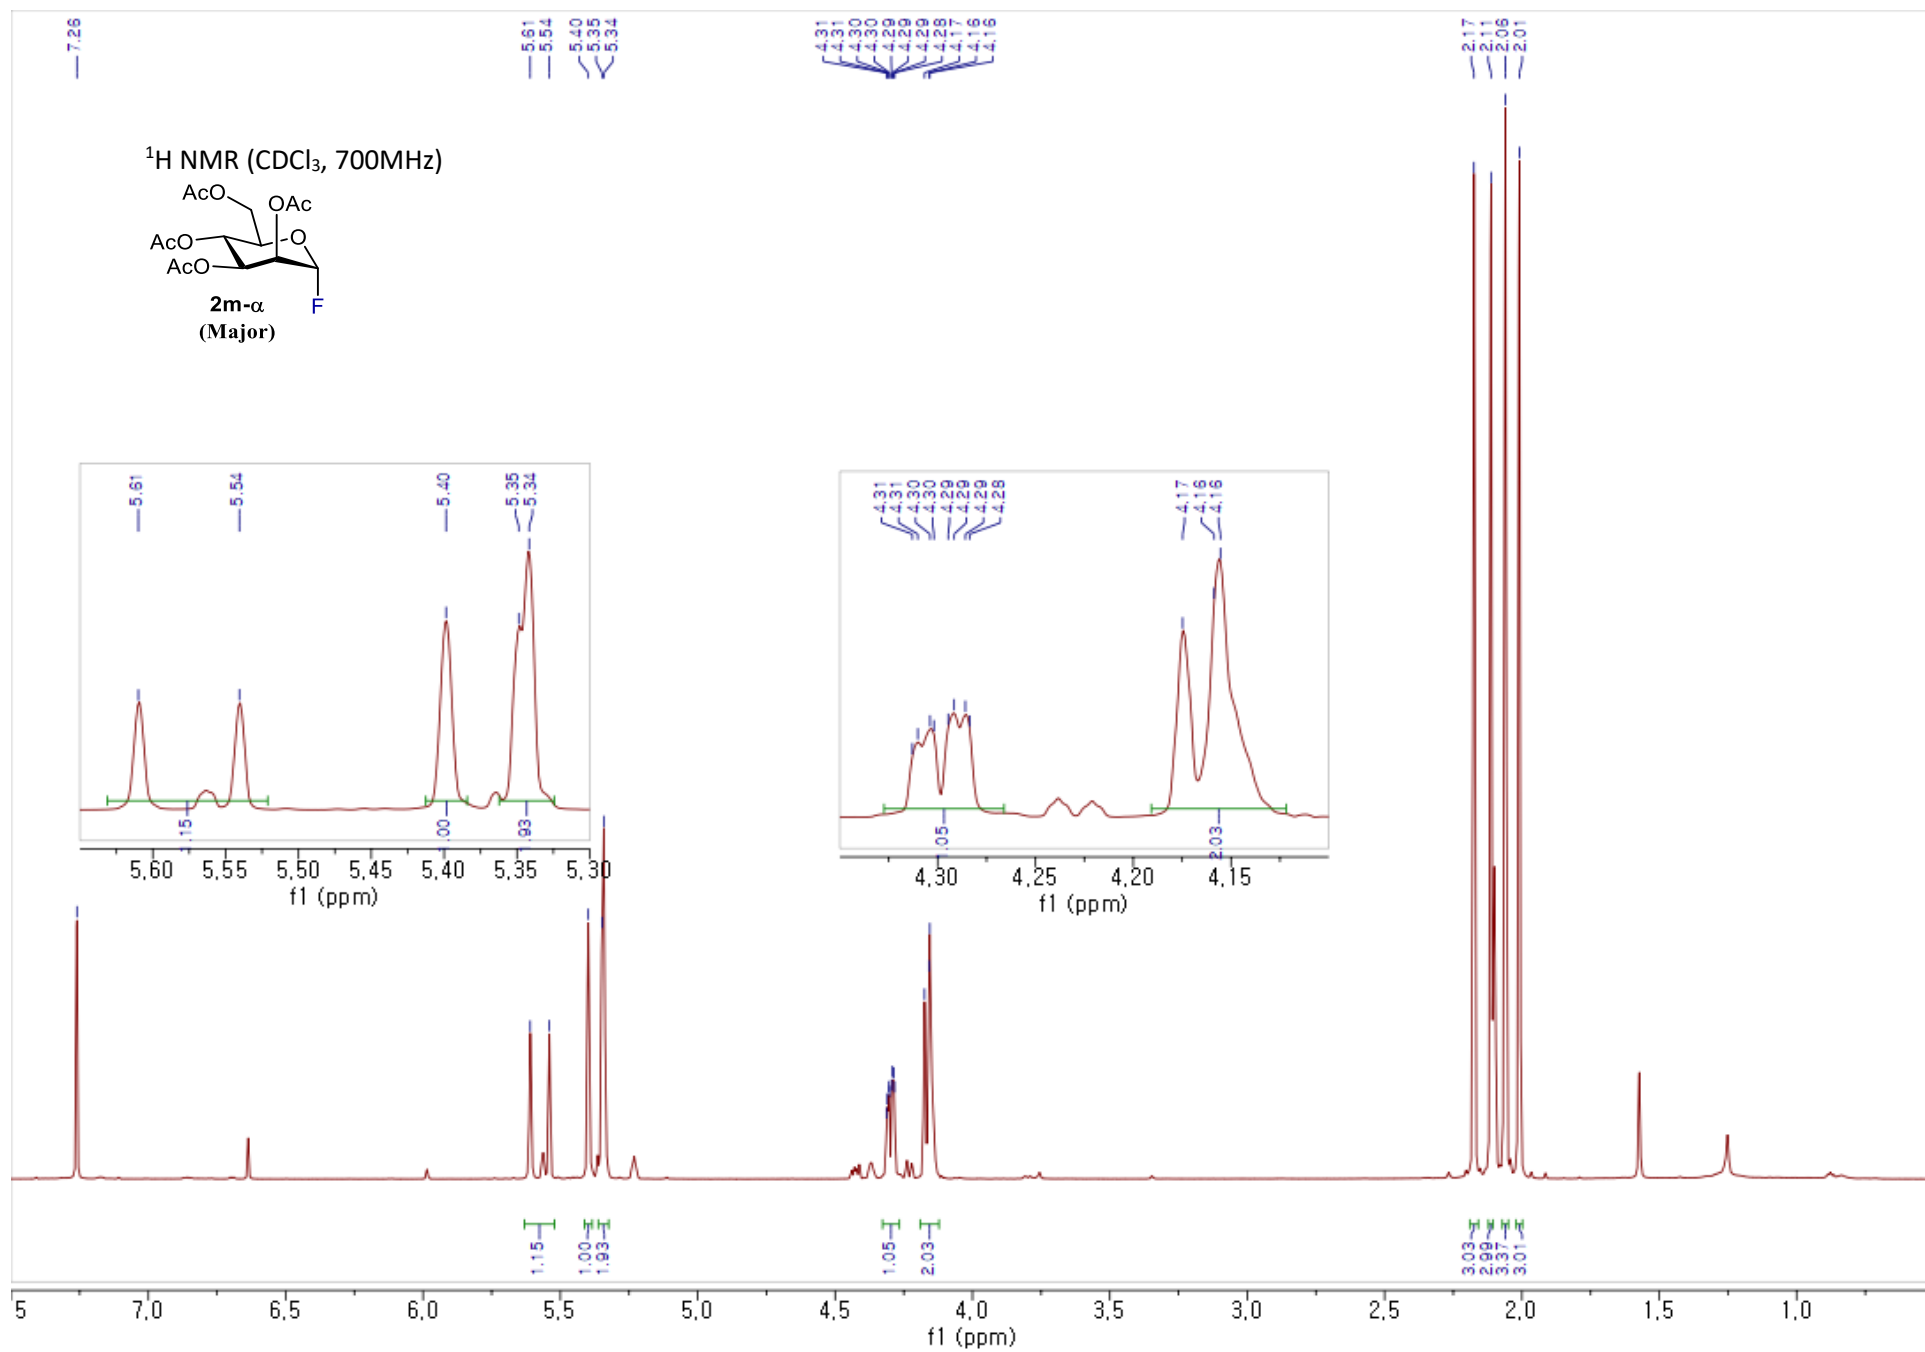

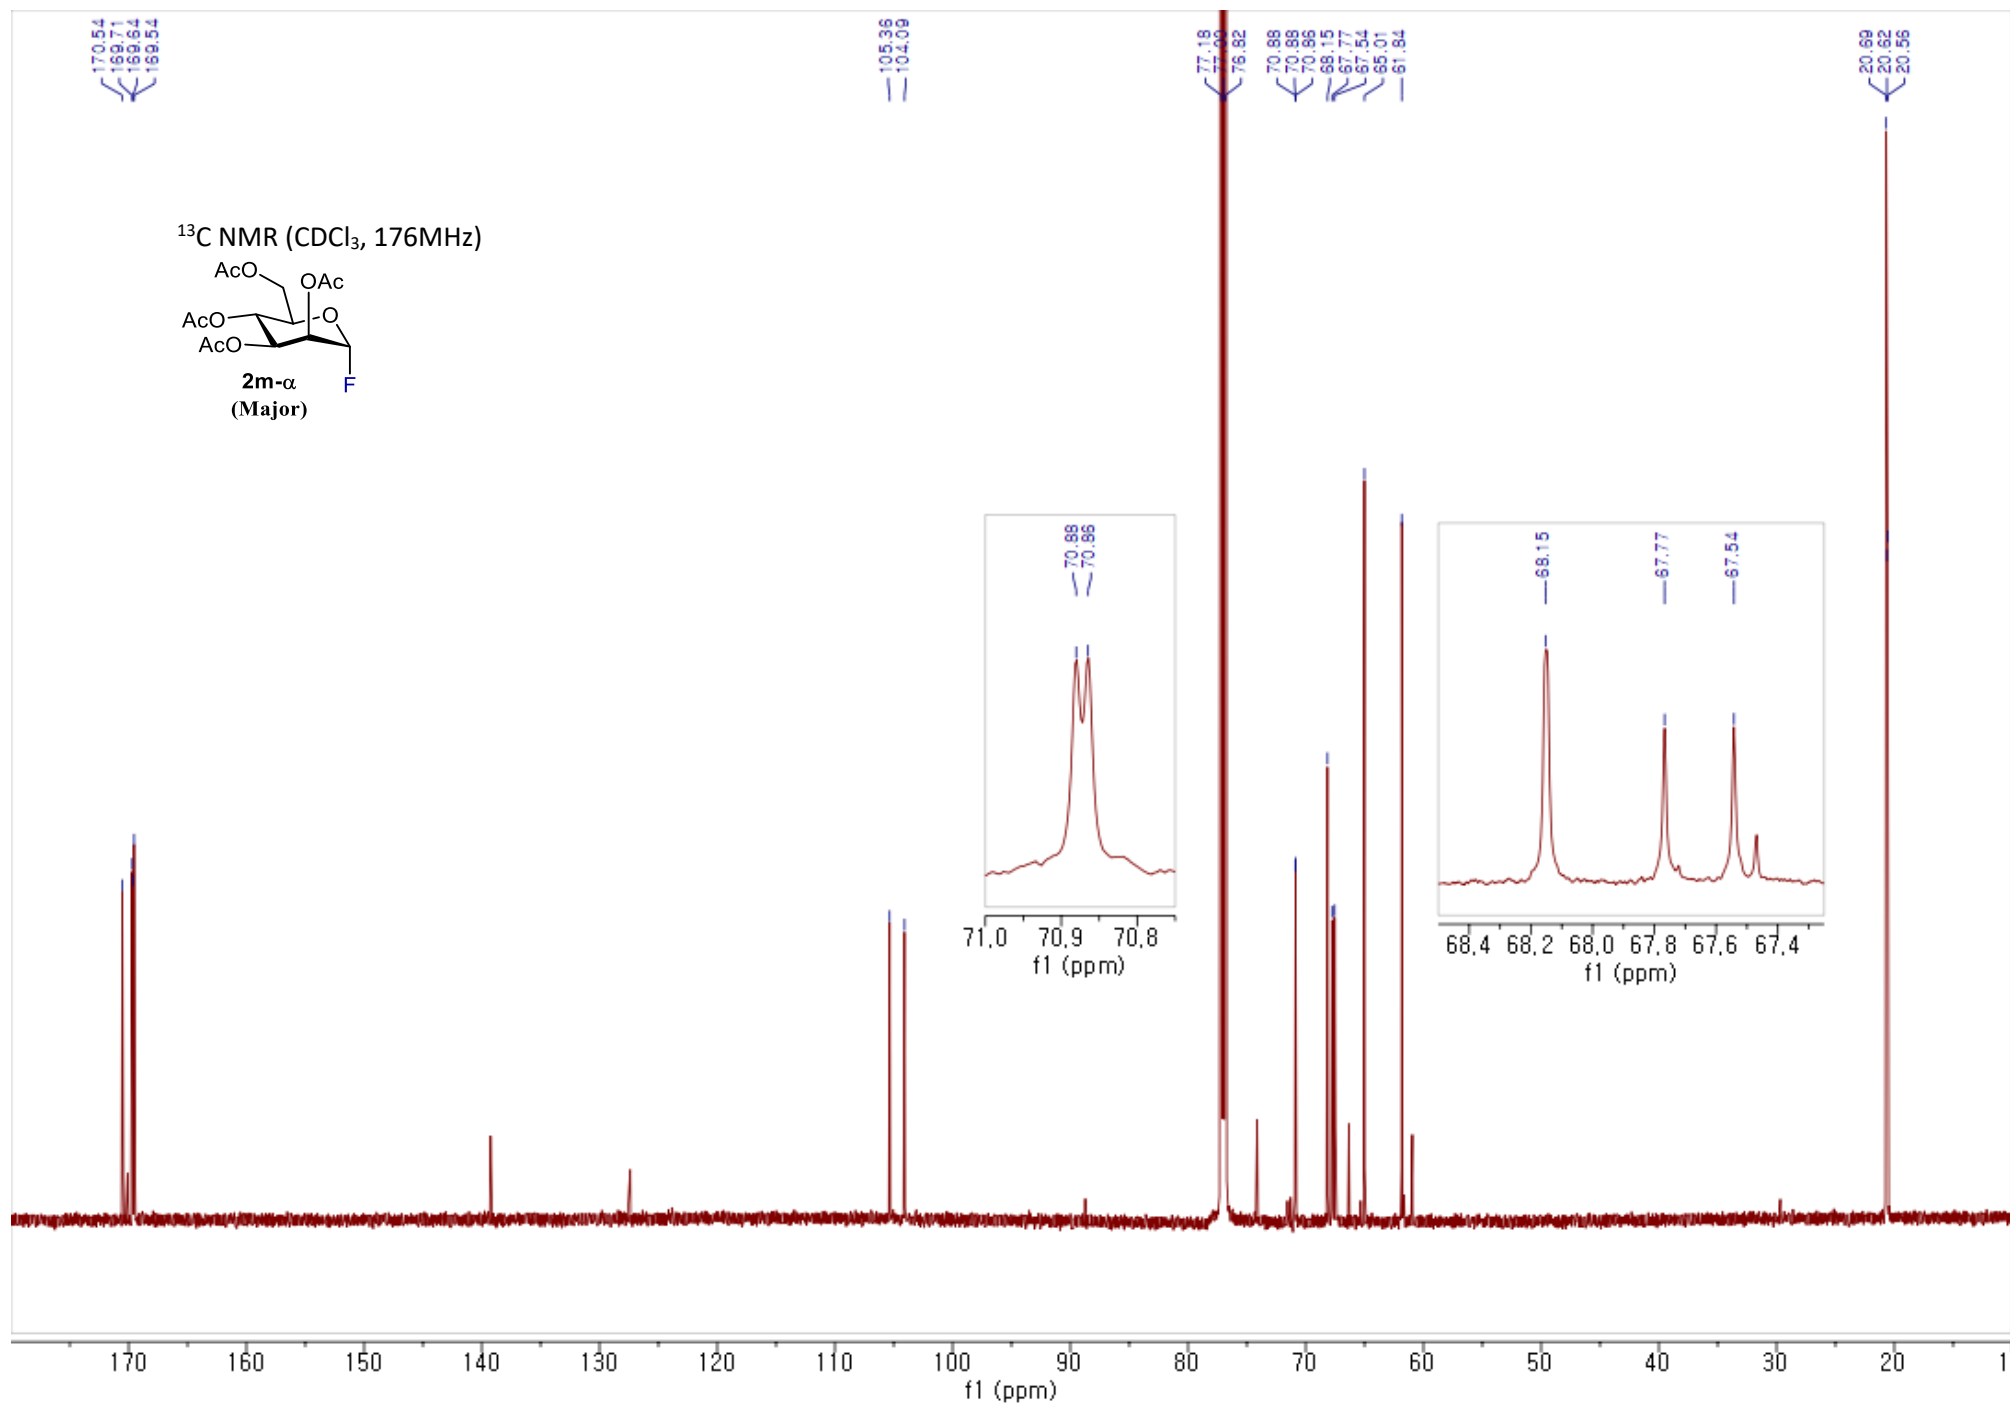

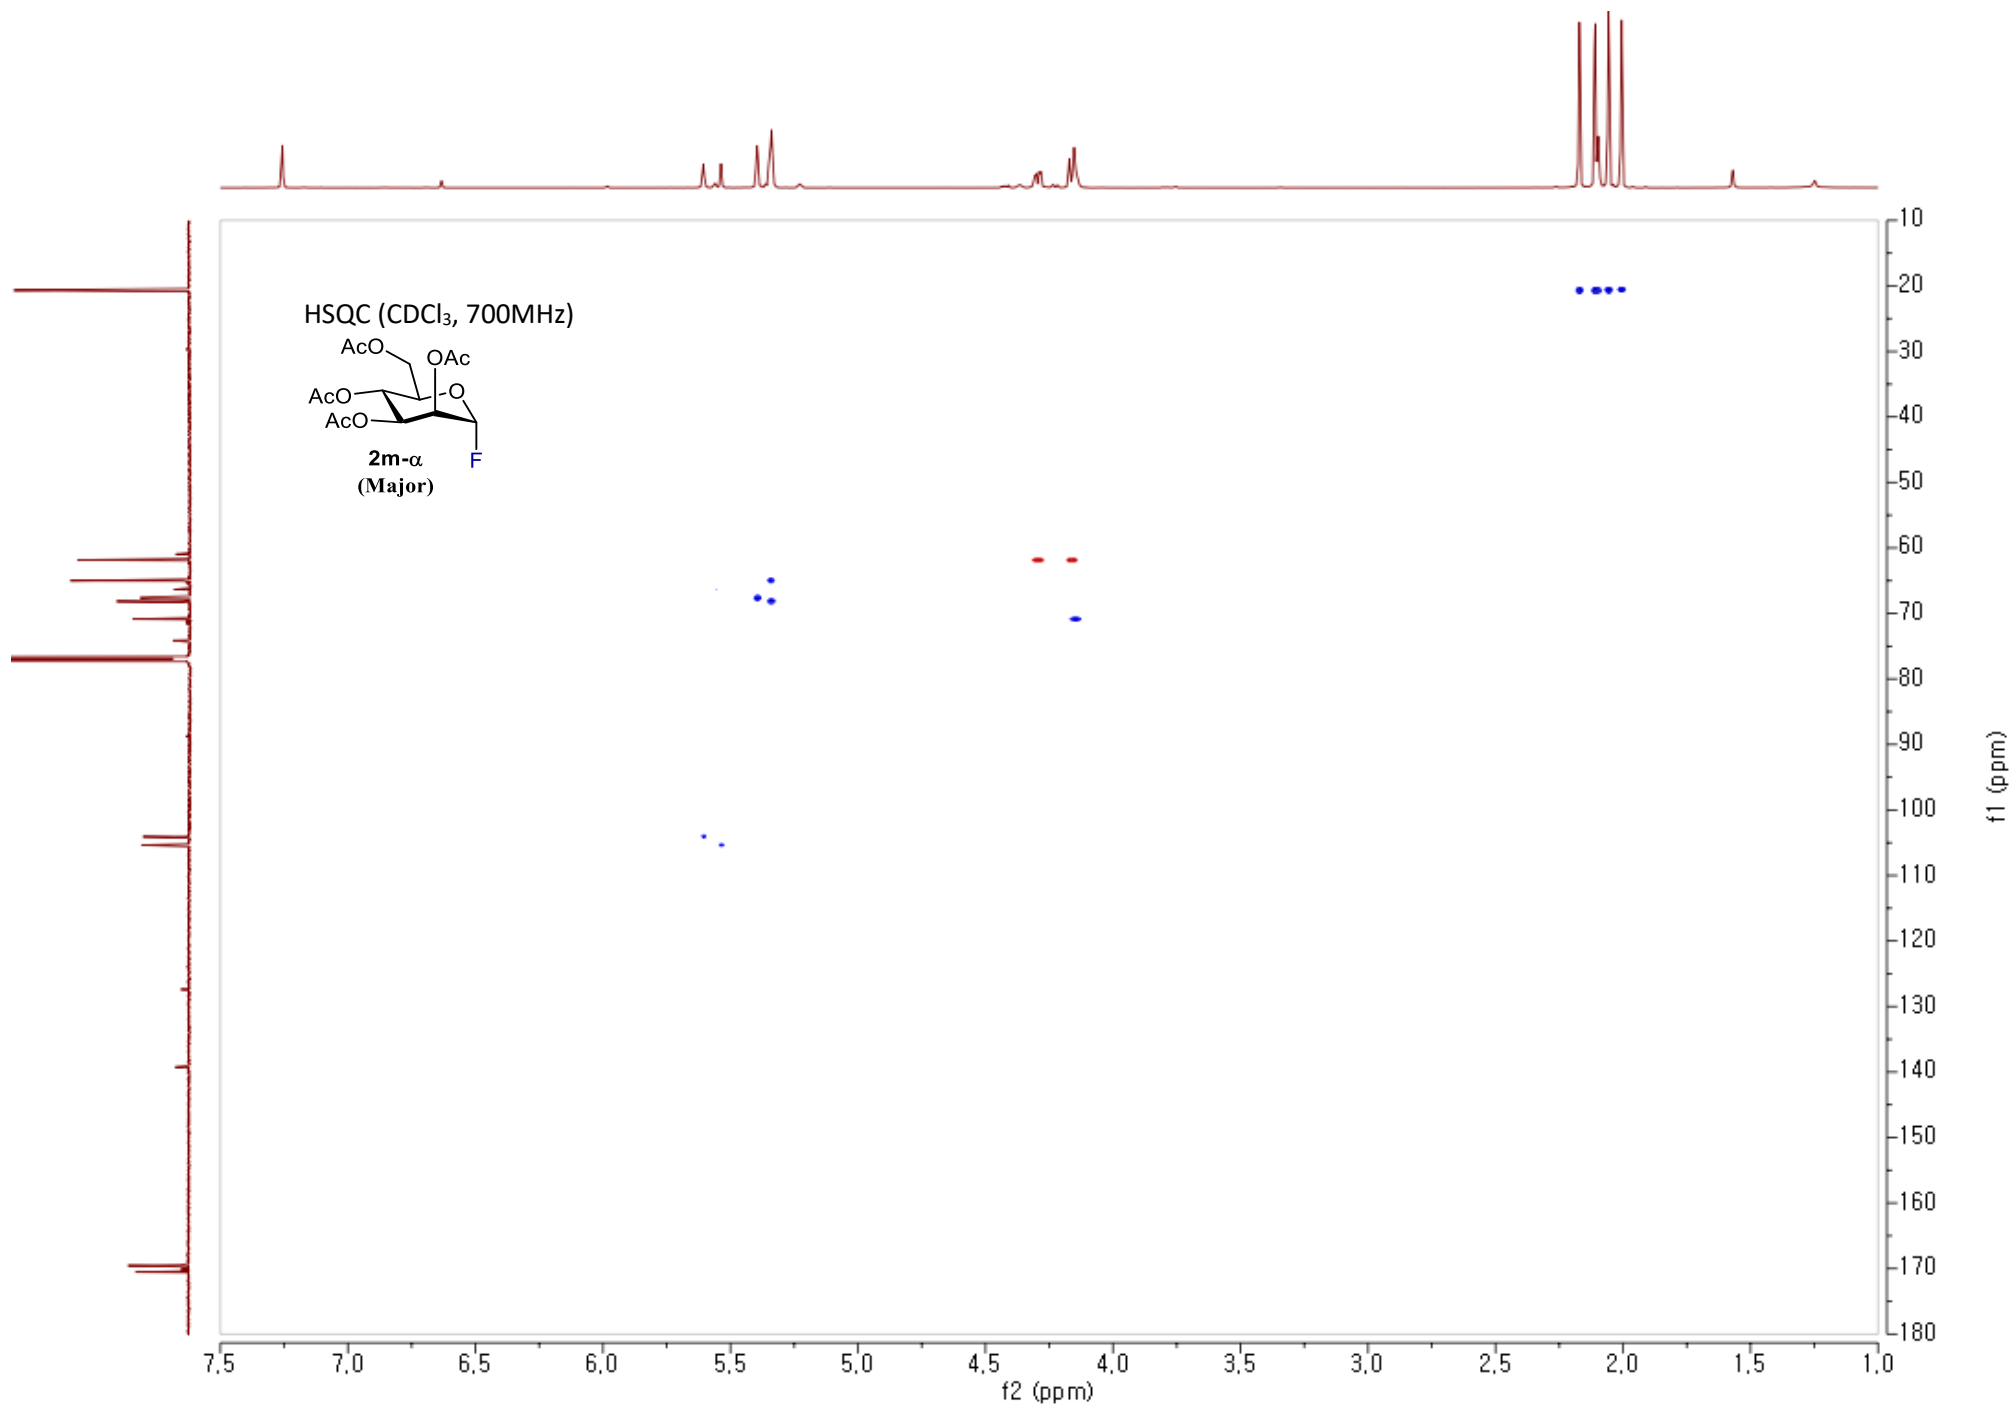



After Work-Up  
 $^{19}\text{F}$  NMR ( $\text{CDCl}_3$ , 564 MHz)

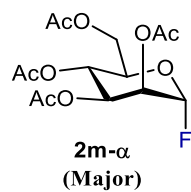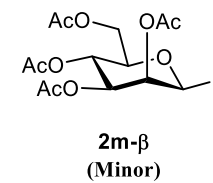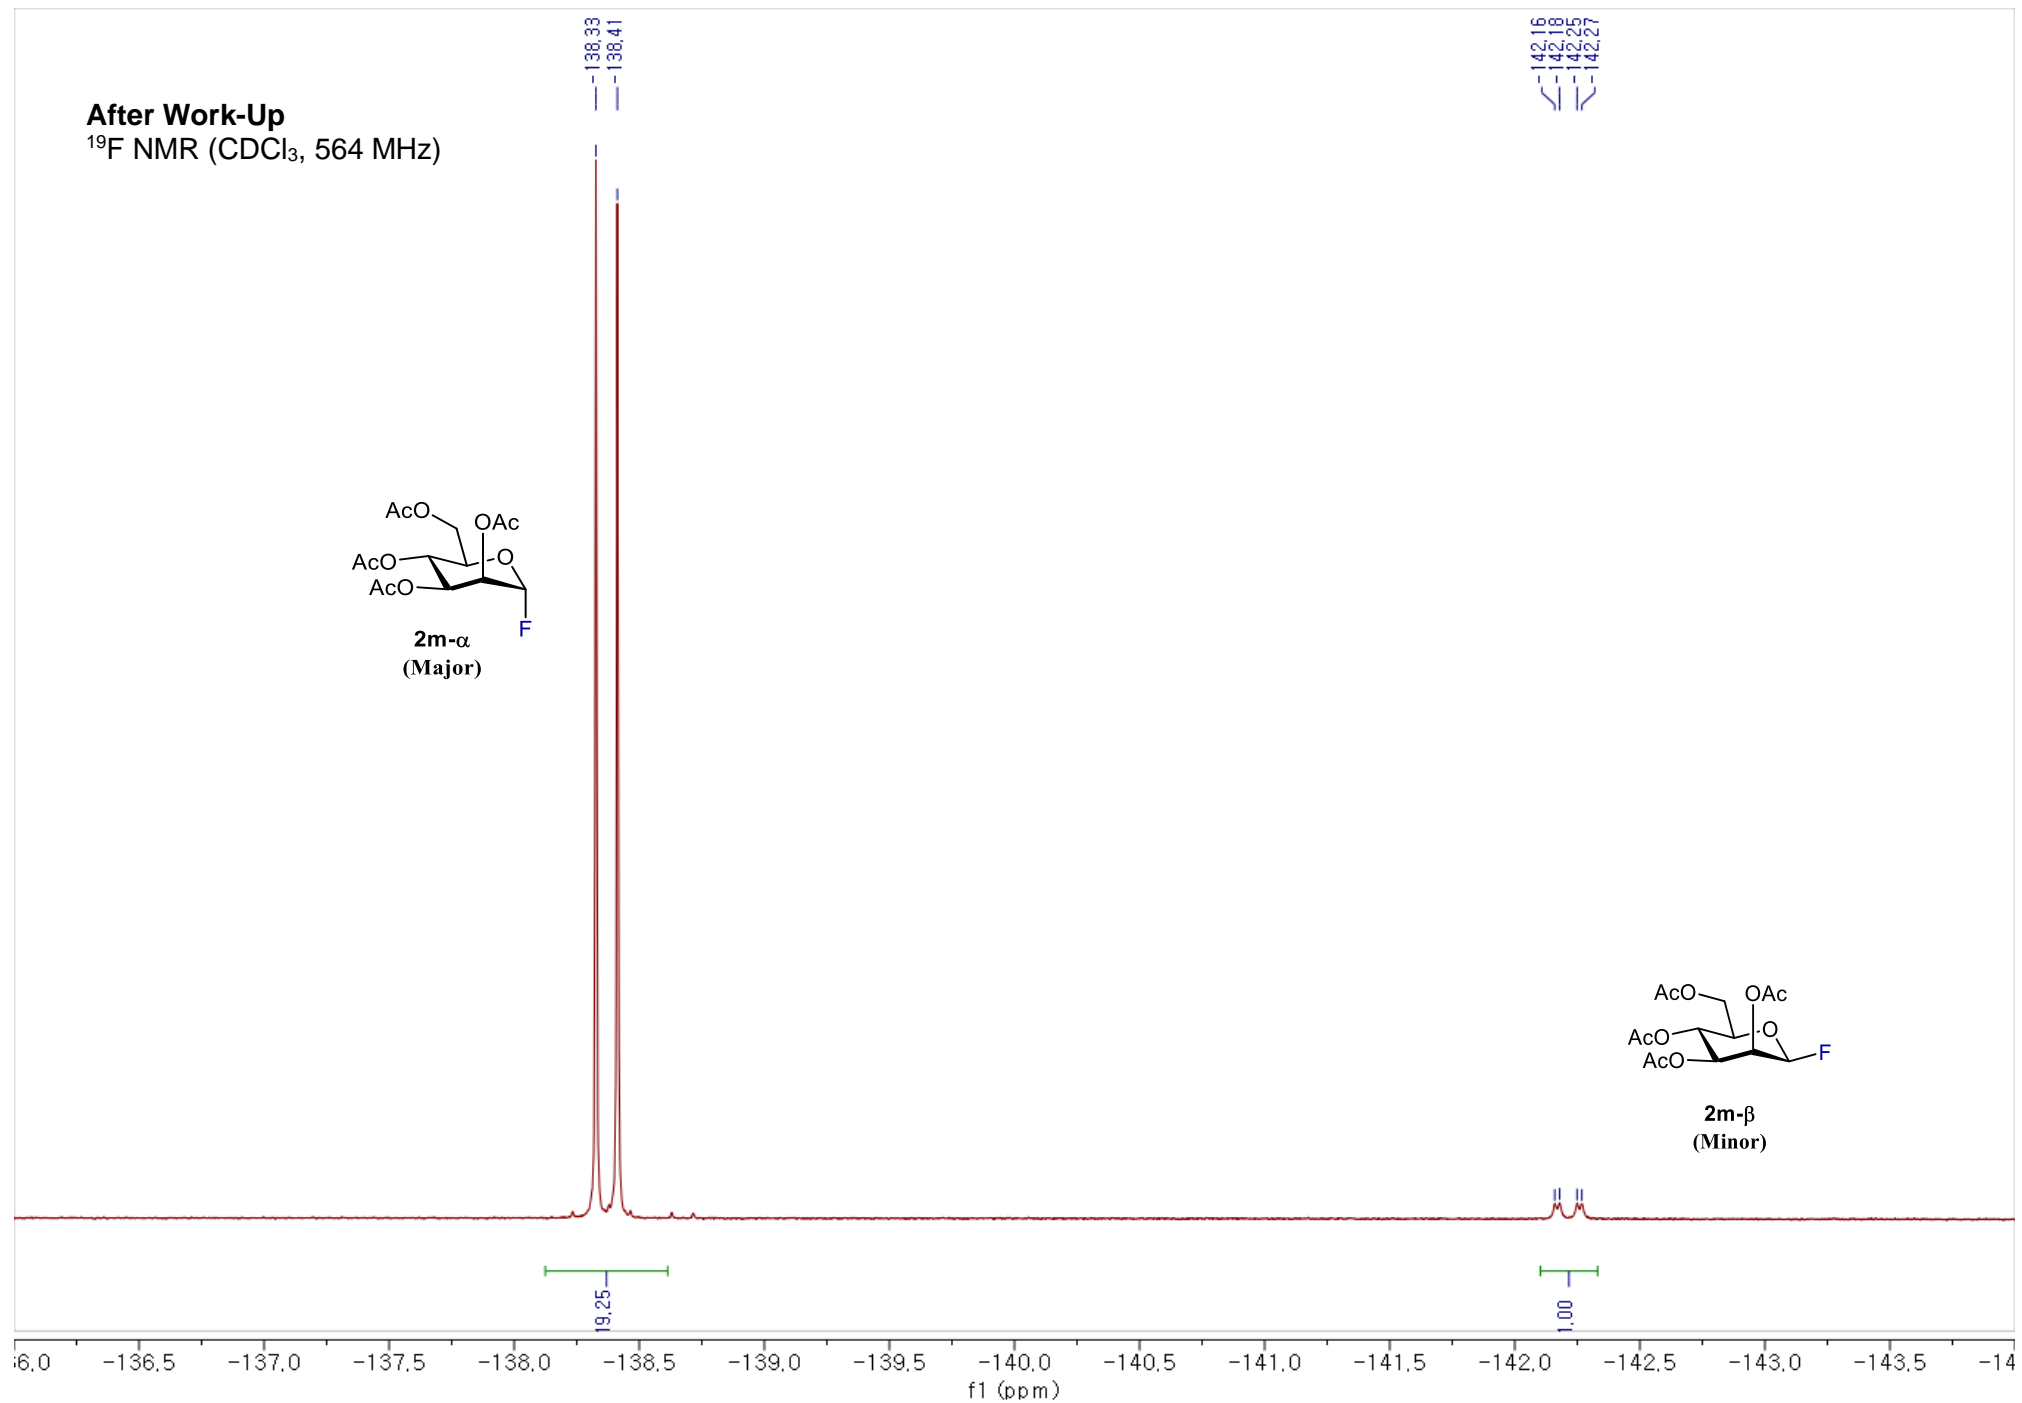

After Purification  
<sup>19</sup>F NMR (CDCl<sub>3</sub>, 564 MHz)

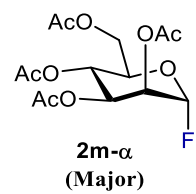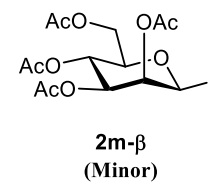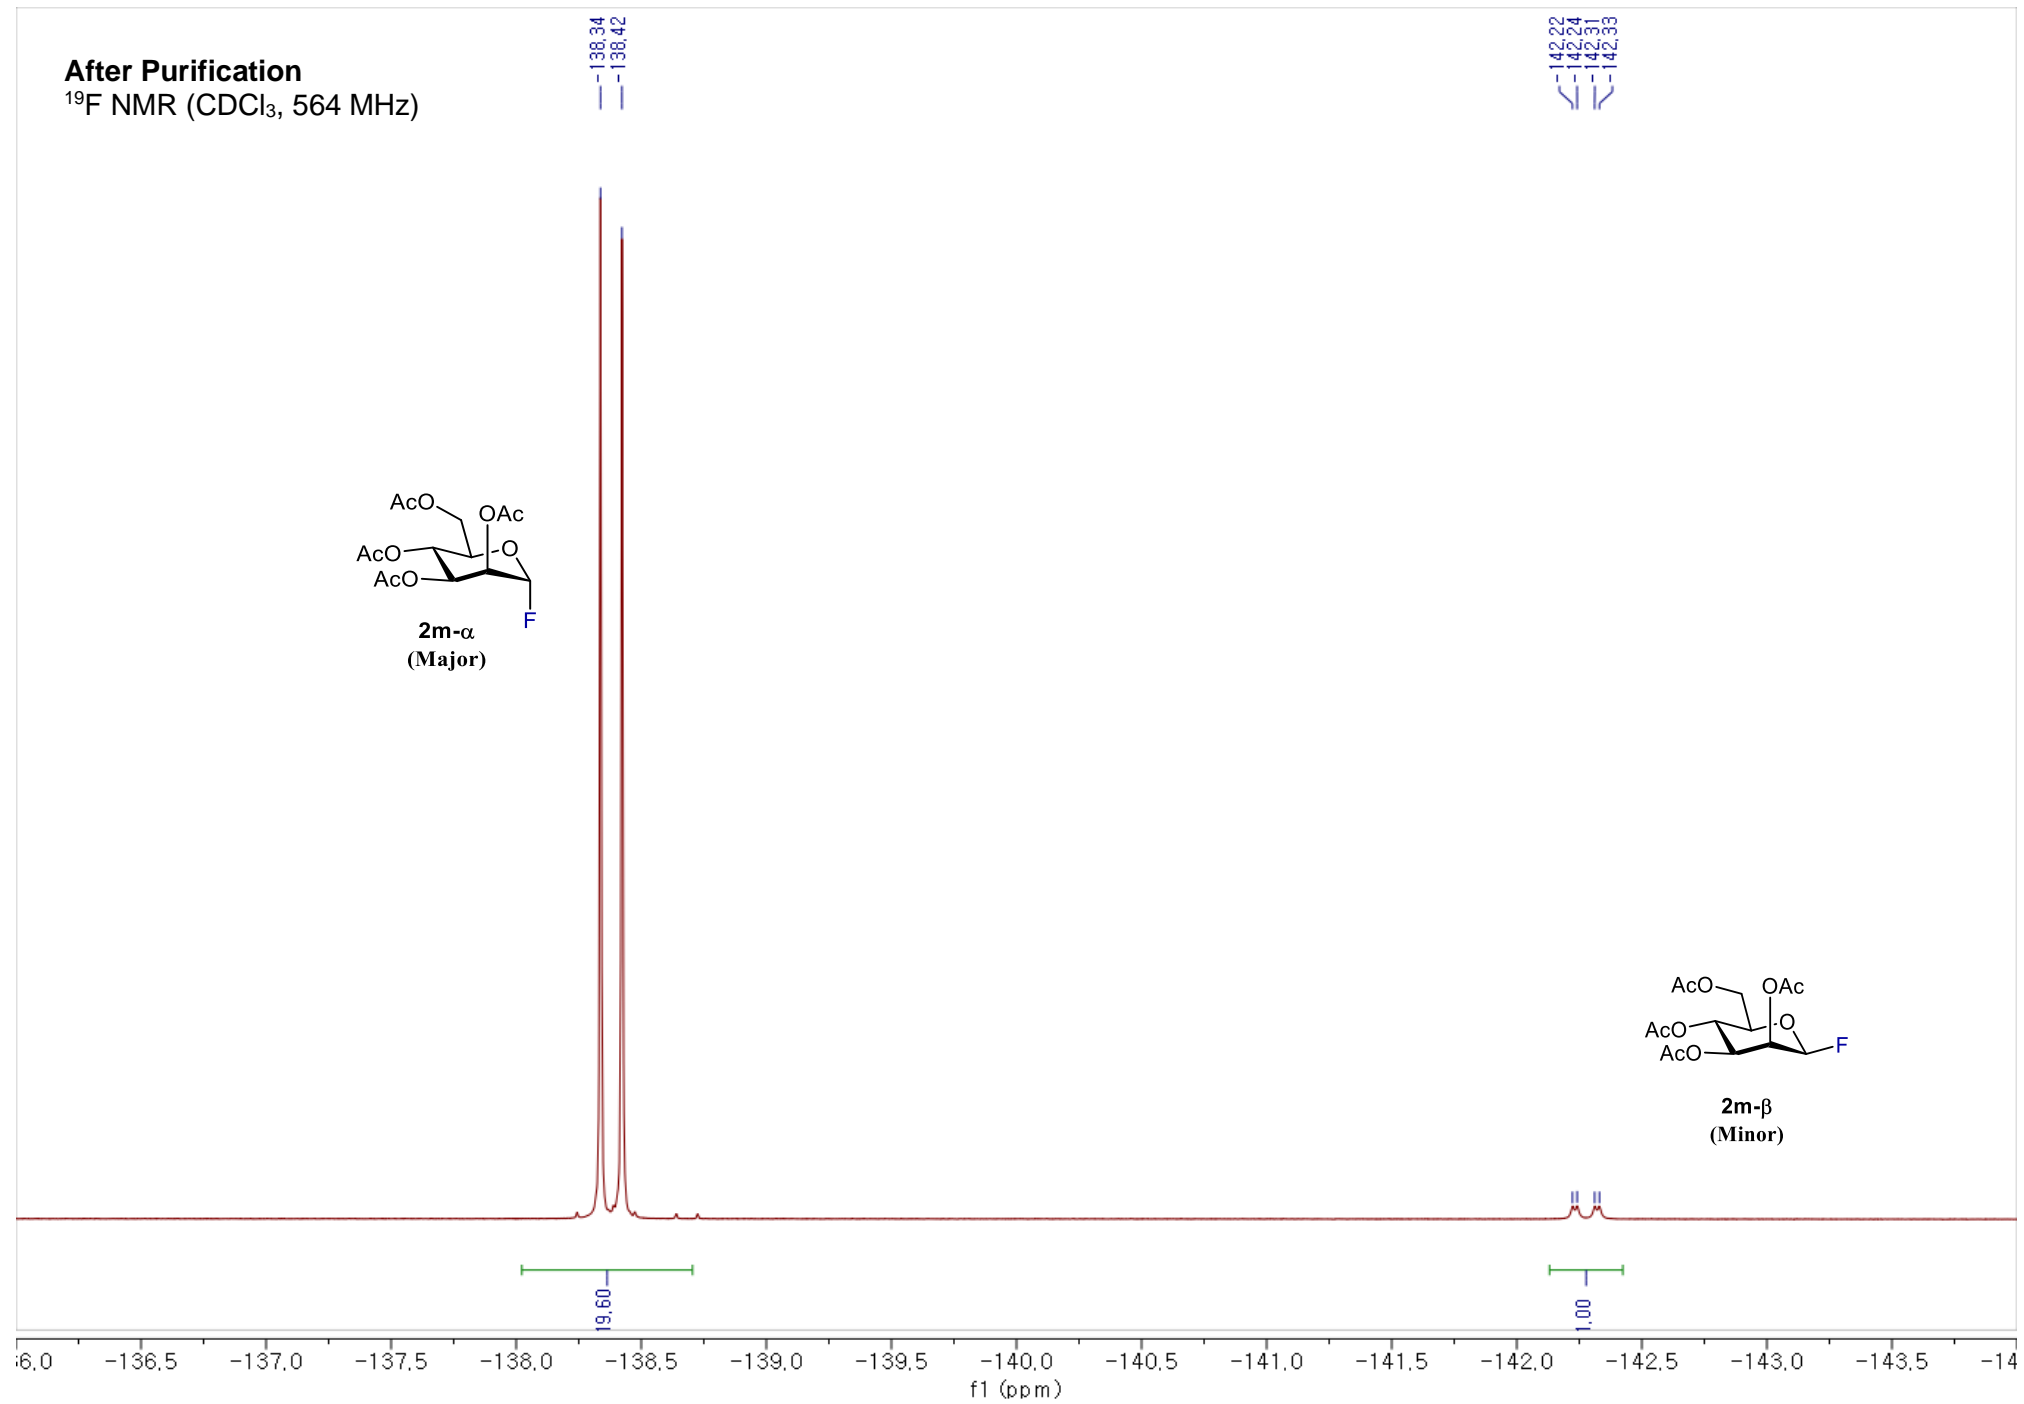

# 2,3,4-Tri-O-acetyl- $\alpha$ -L-rhamnopyranosyl fluoride (2n- $\alpha$ , Major diastereomer)

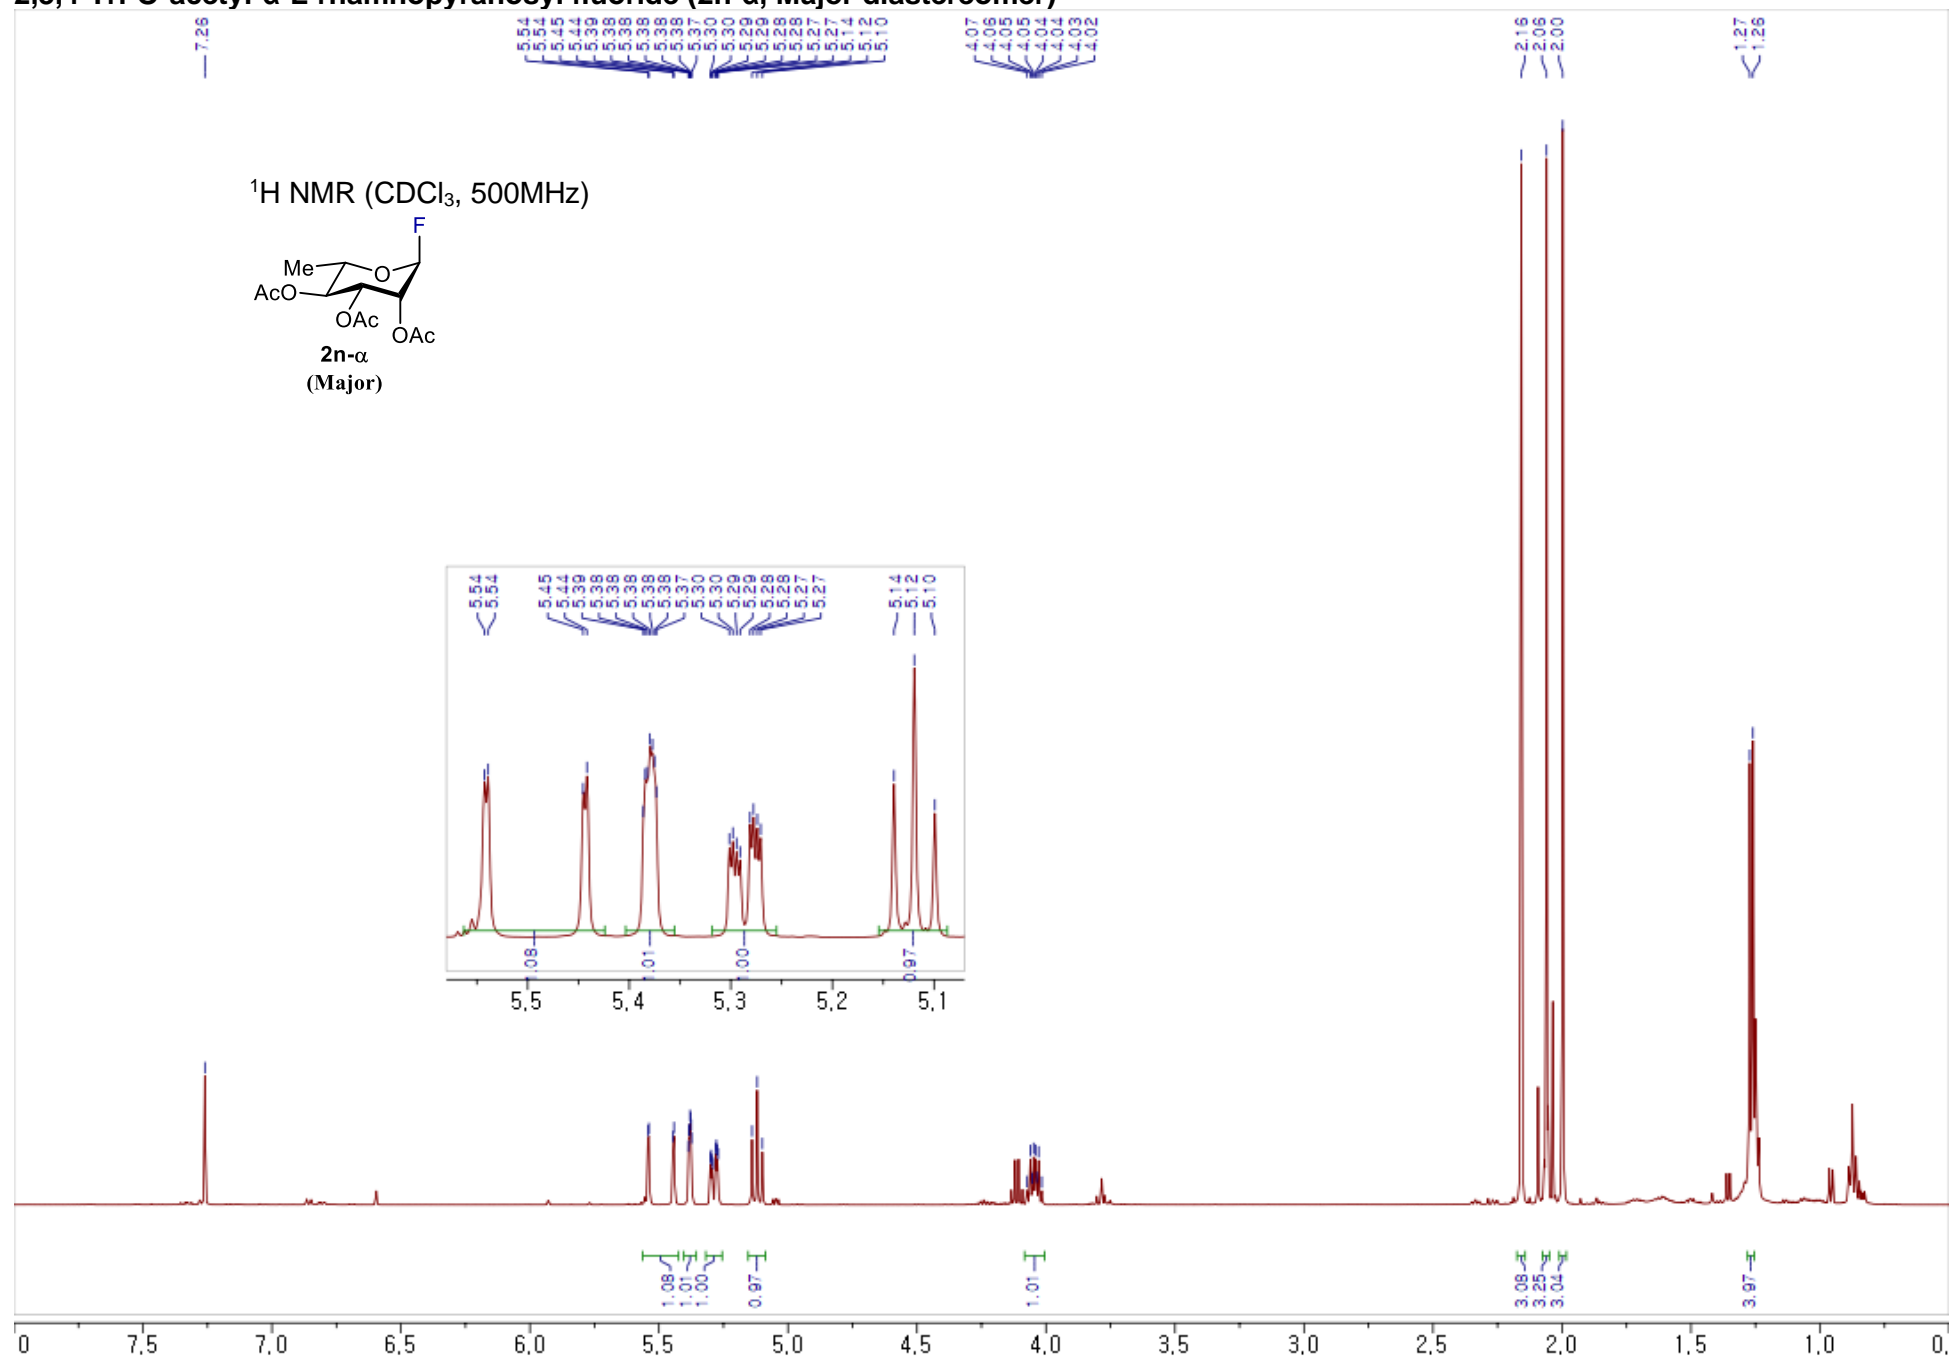

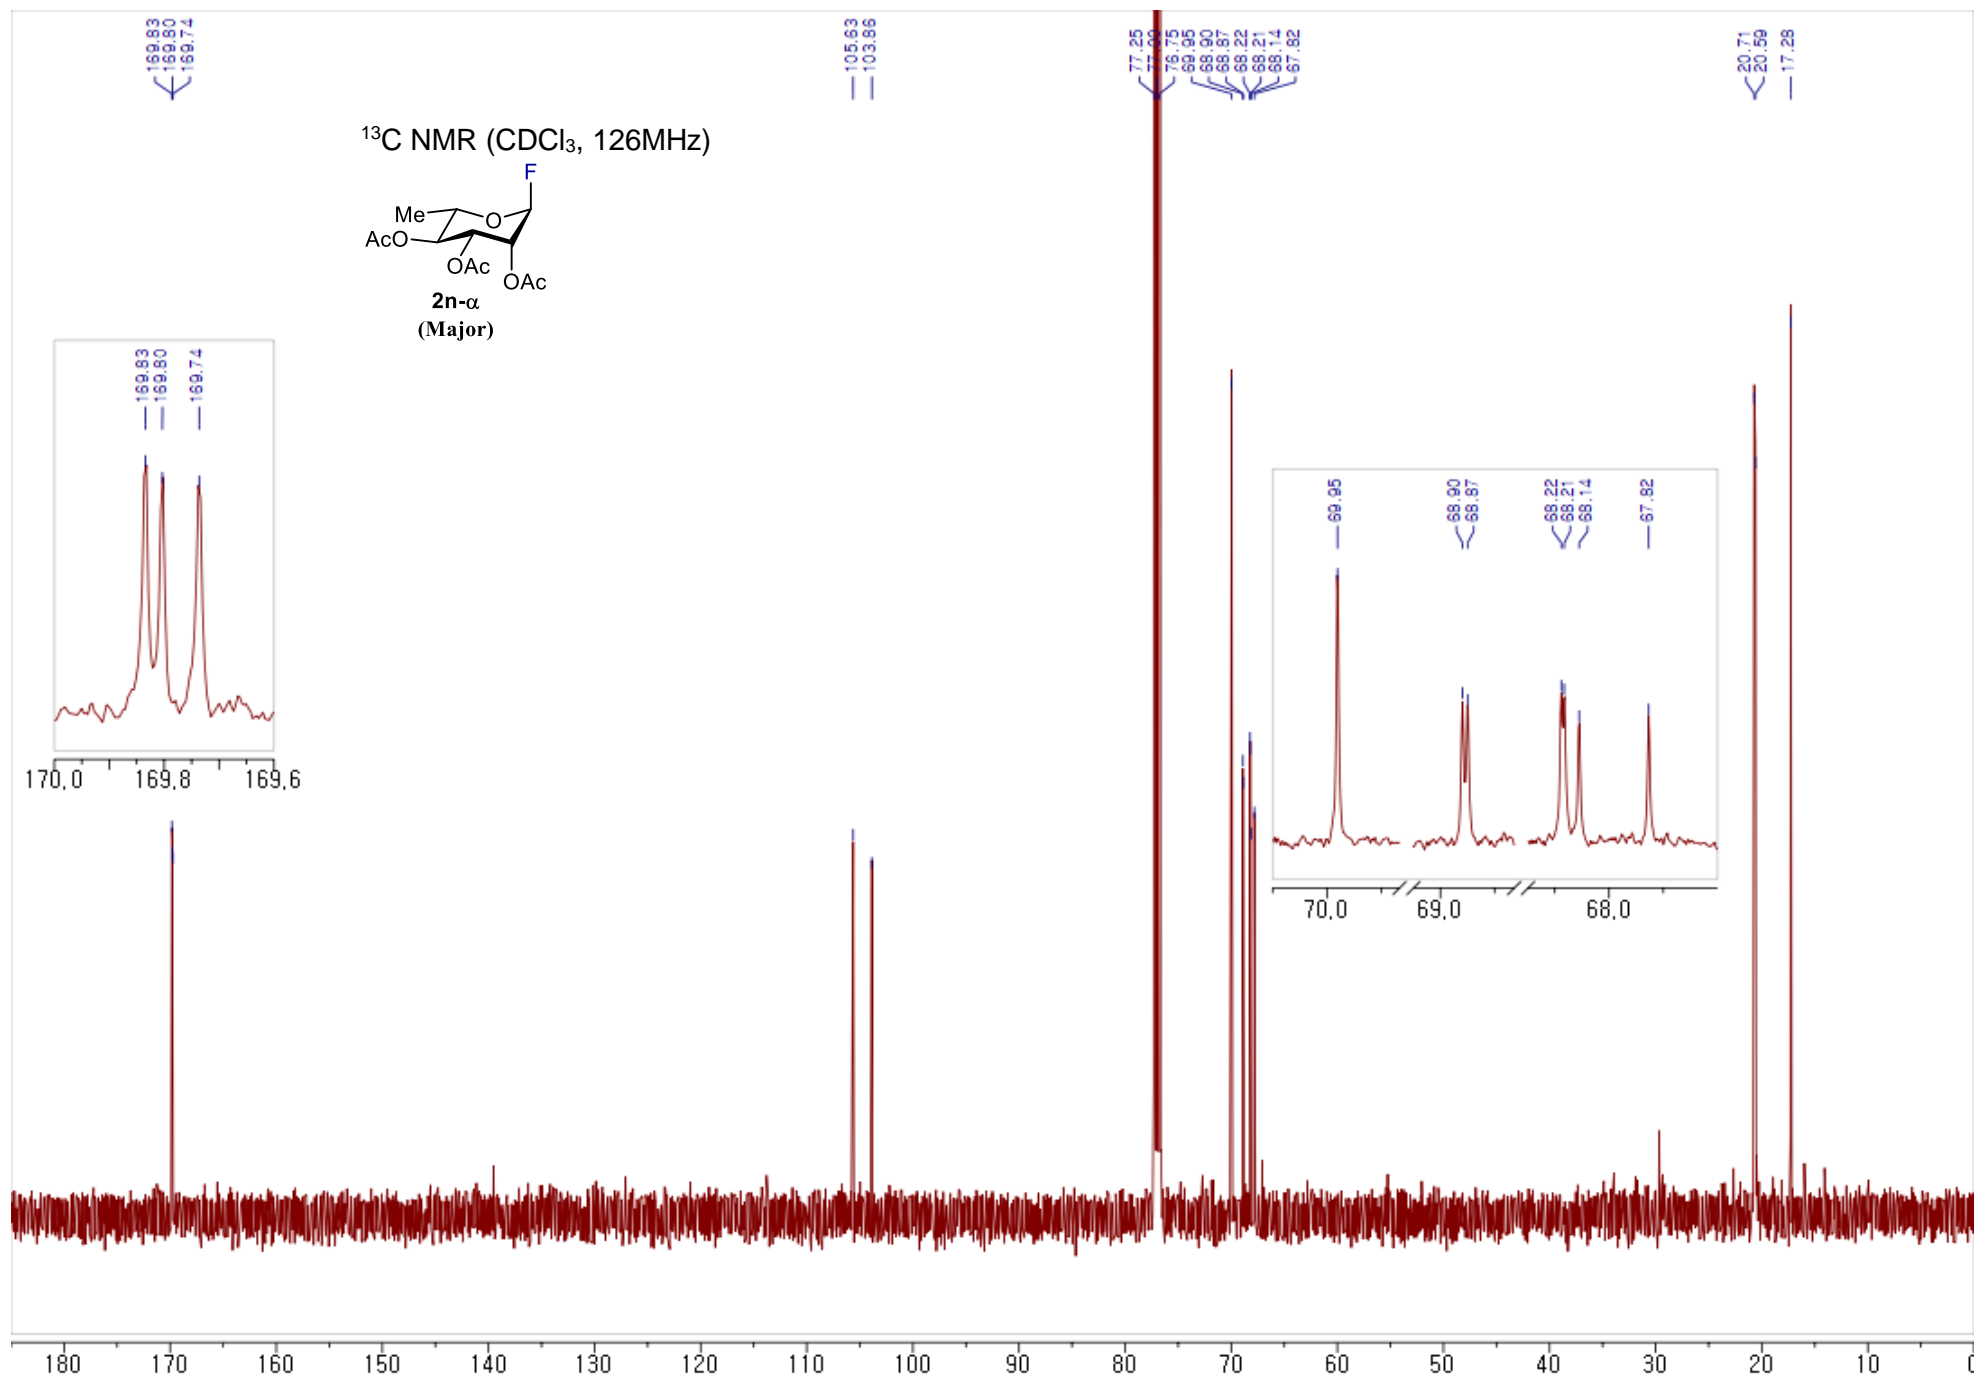

After Work-Up  
<sup>19</sup>F NMR (CDCl<sub>3</sub>, 564 MHz)

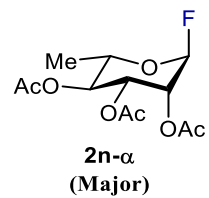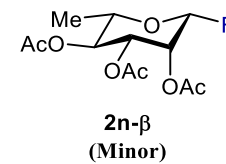

137.41  
137.50

144.67  
144.68  
144.76  
144.77

19.03

1.00

-135.5 -136.0 -136.5 -137.0 -137.5 -138.0 -138.5 -139.0 -139.5 -140.0 -140.5 -141.0 -141.5 -142.0 -142.5 -143.0 -143.5 -144.0 -144.5 -145.0 -145.5 -146.0 -146.5 -14

f1 (ppm)

After Purification  
<sup>19</sup>F NMR (CDCl<sub>3</sub>, 564 MHz)

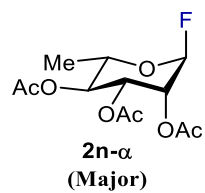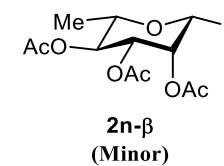

-137.44  
-137.53

-144.81  
-144.82  
-144.89  
-144.90

18.17

1.00

-135.5 -136.0 -136.5 -137.0 -137.5 -138.0 -138.5 -139.0 -139.5 -140.0 -140.5 -141.0 -141.5 -142.0 -142.5 -143.0 -143.5 -144.0 -144.5 -145.0 -145.5 -146.0 -146.5 -14

f1 (ppm)

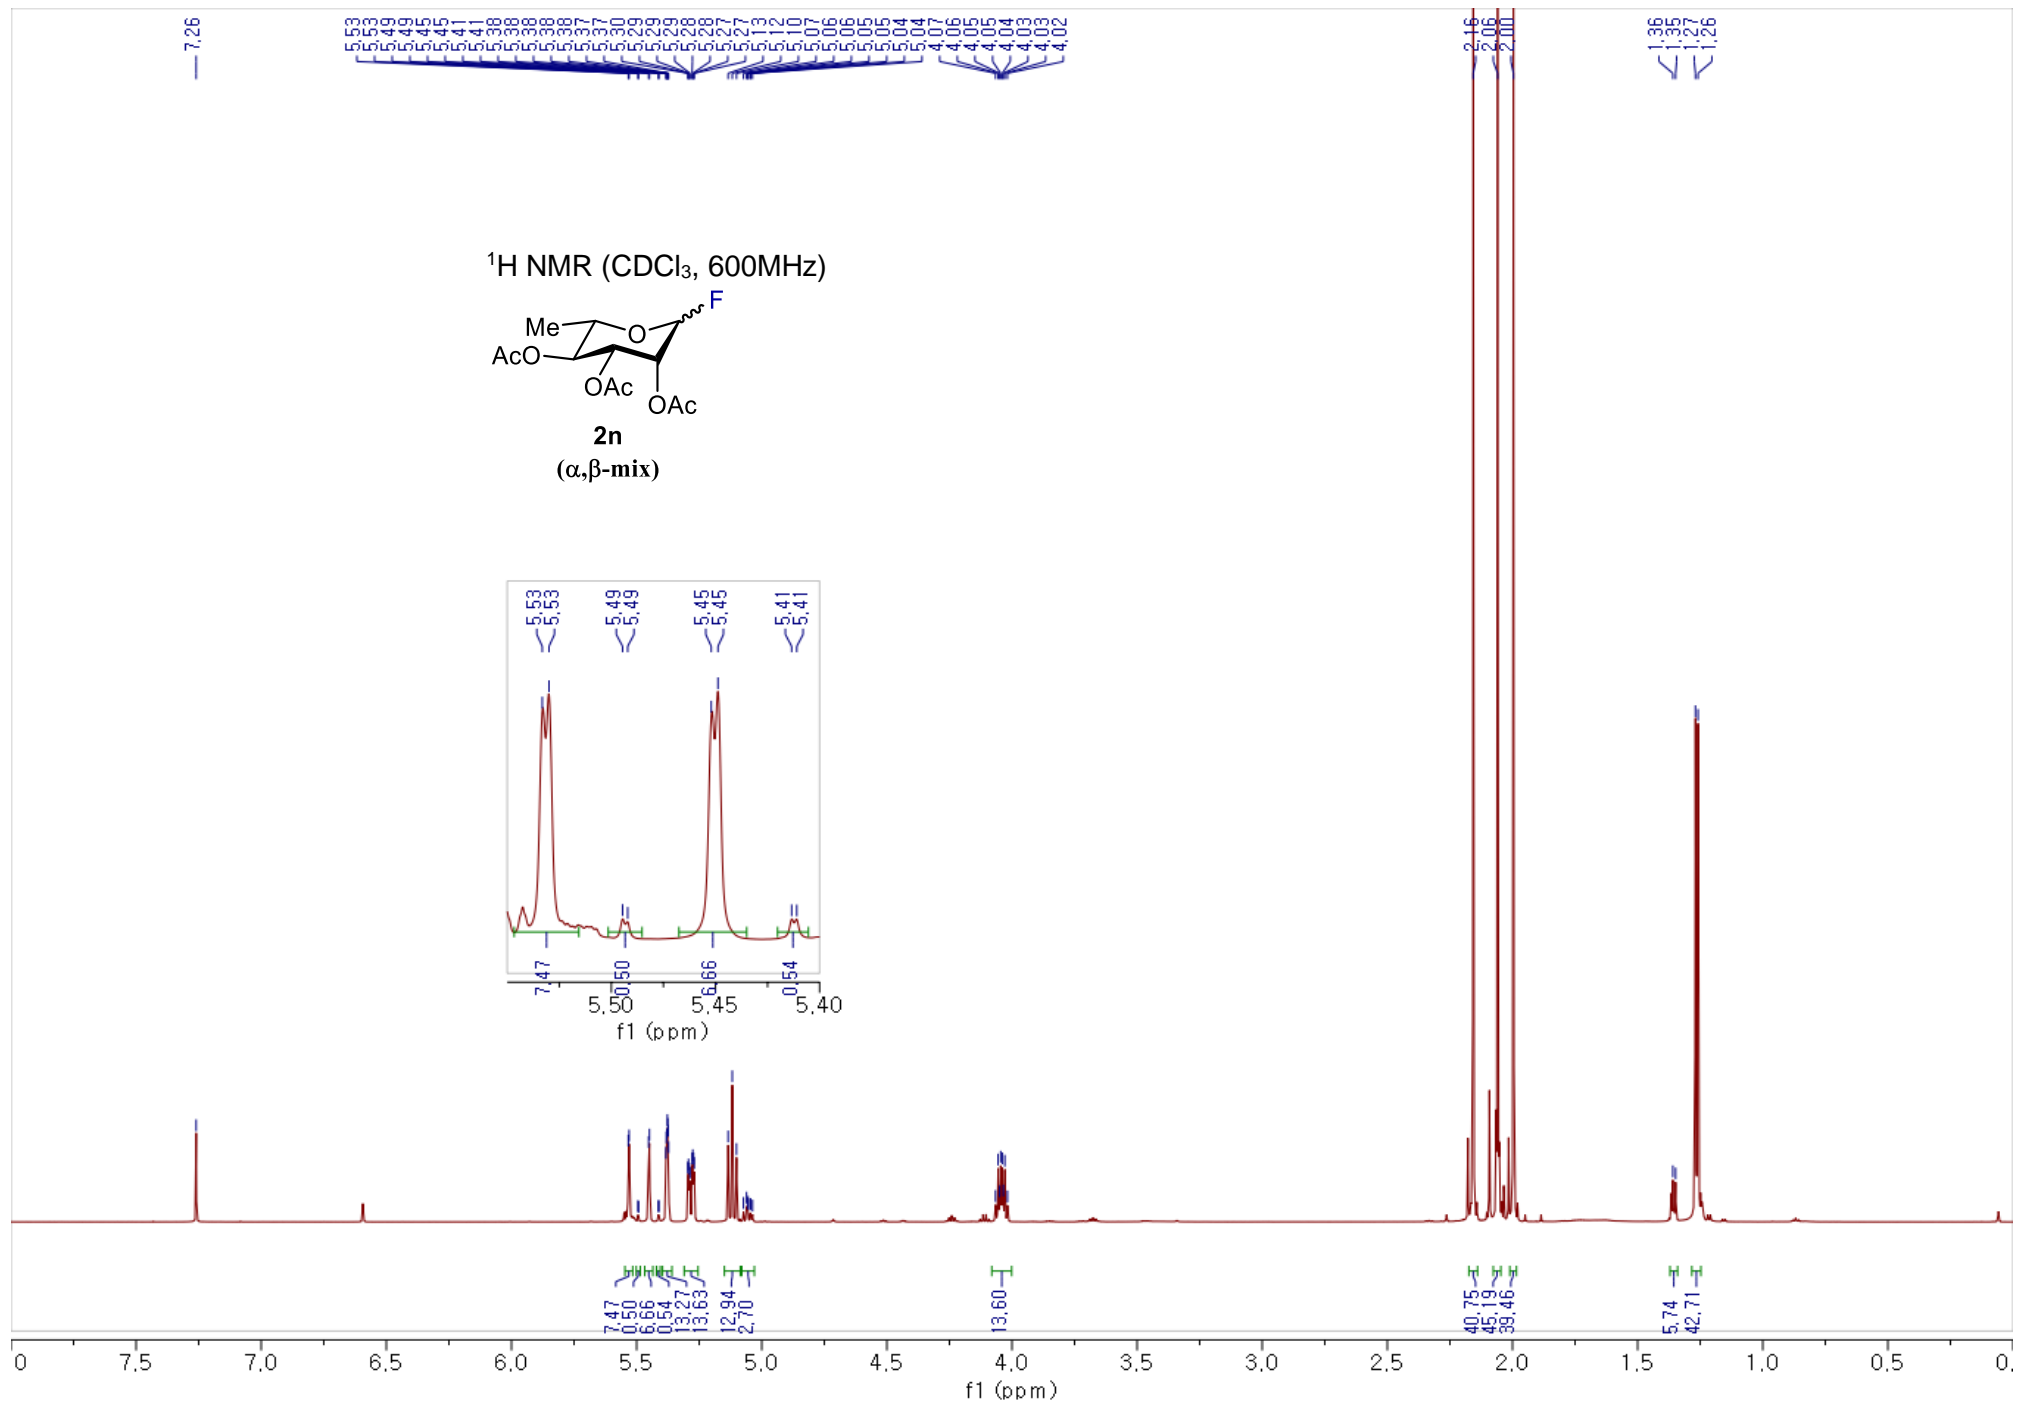

2,3,4-Tri-O-benzoyl- $\alpha$ -L-rhamnopyranosyl fluoride (2 $\alpha$ - $\alpha$ , Major diastereomer)

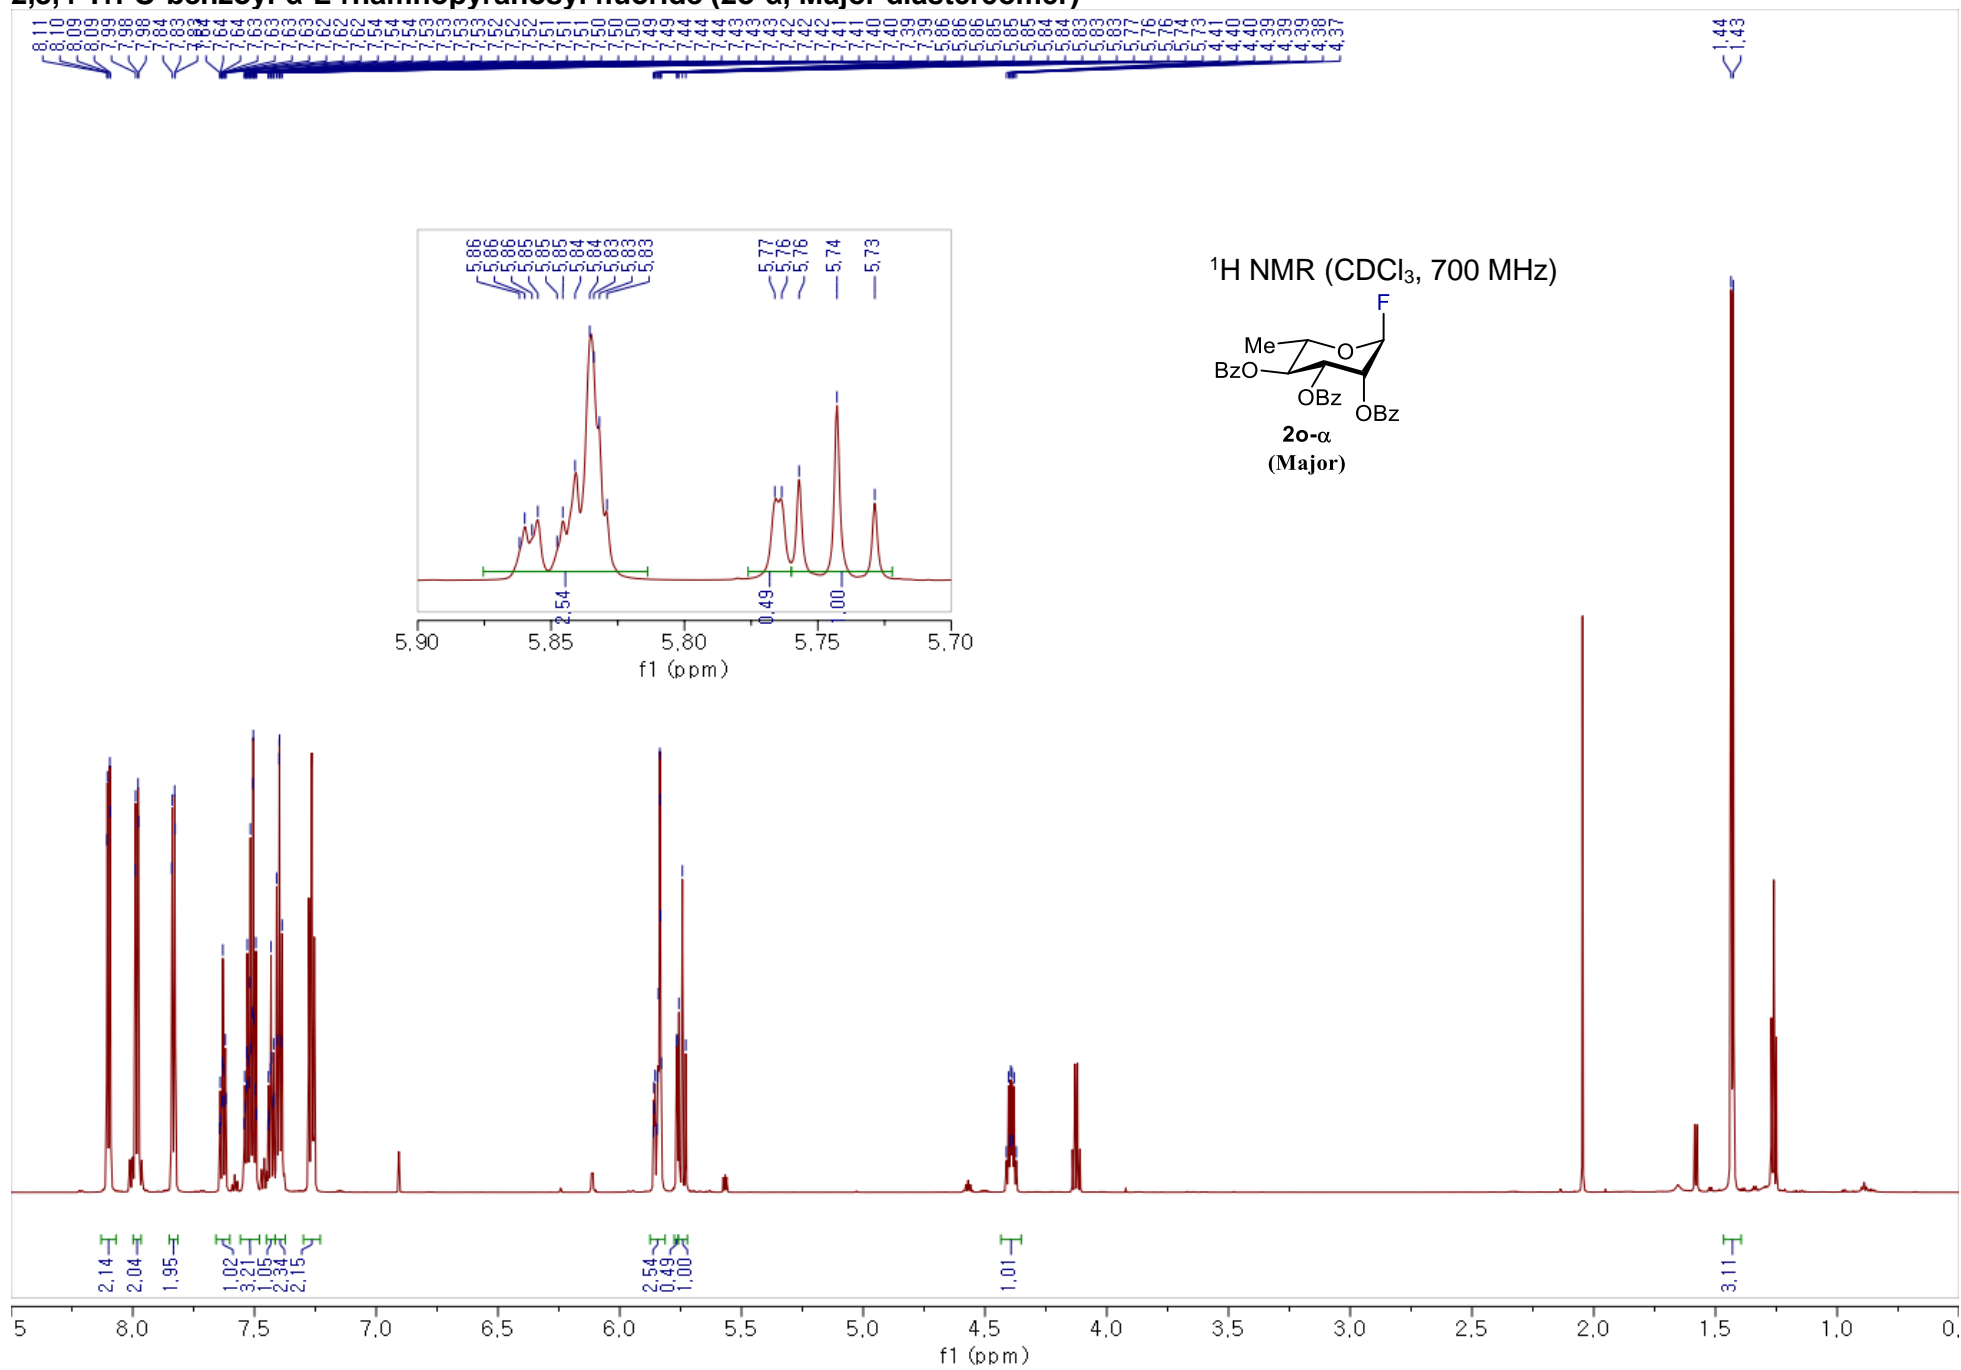



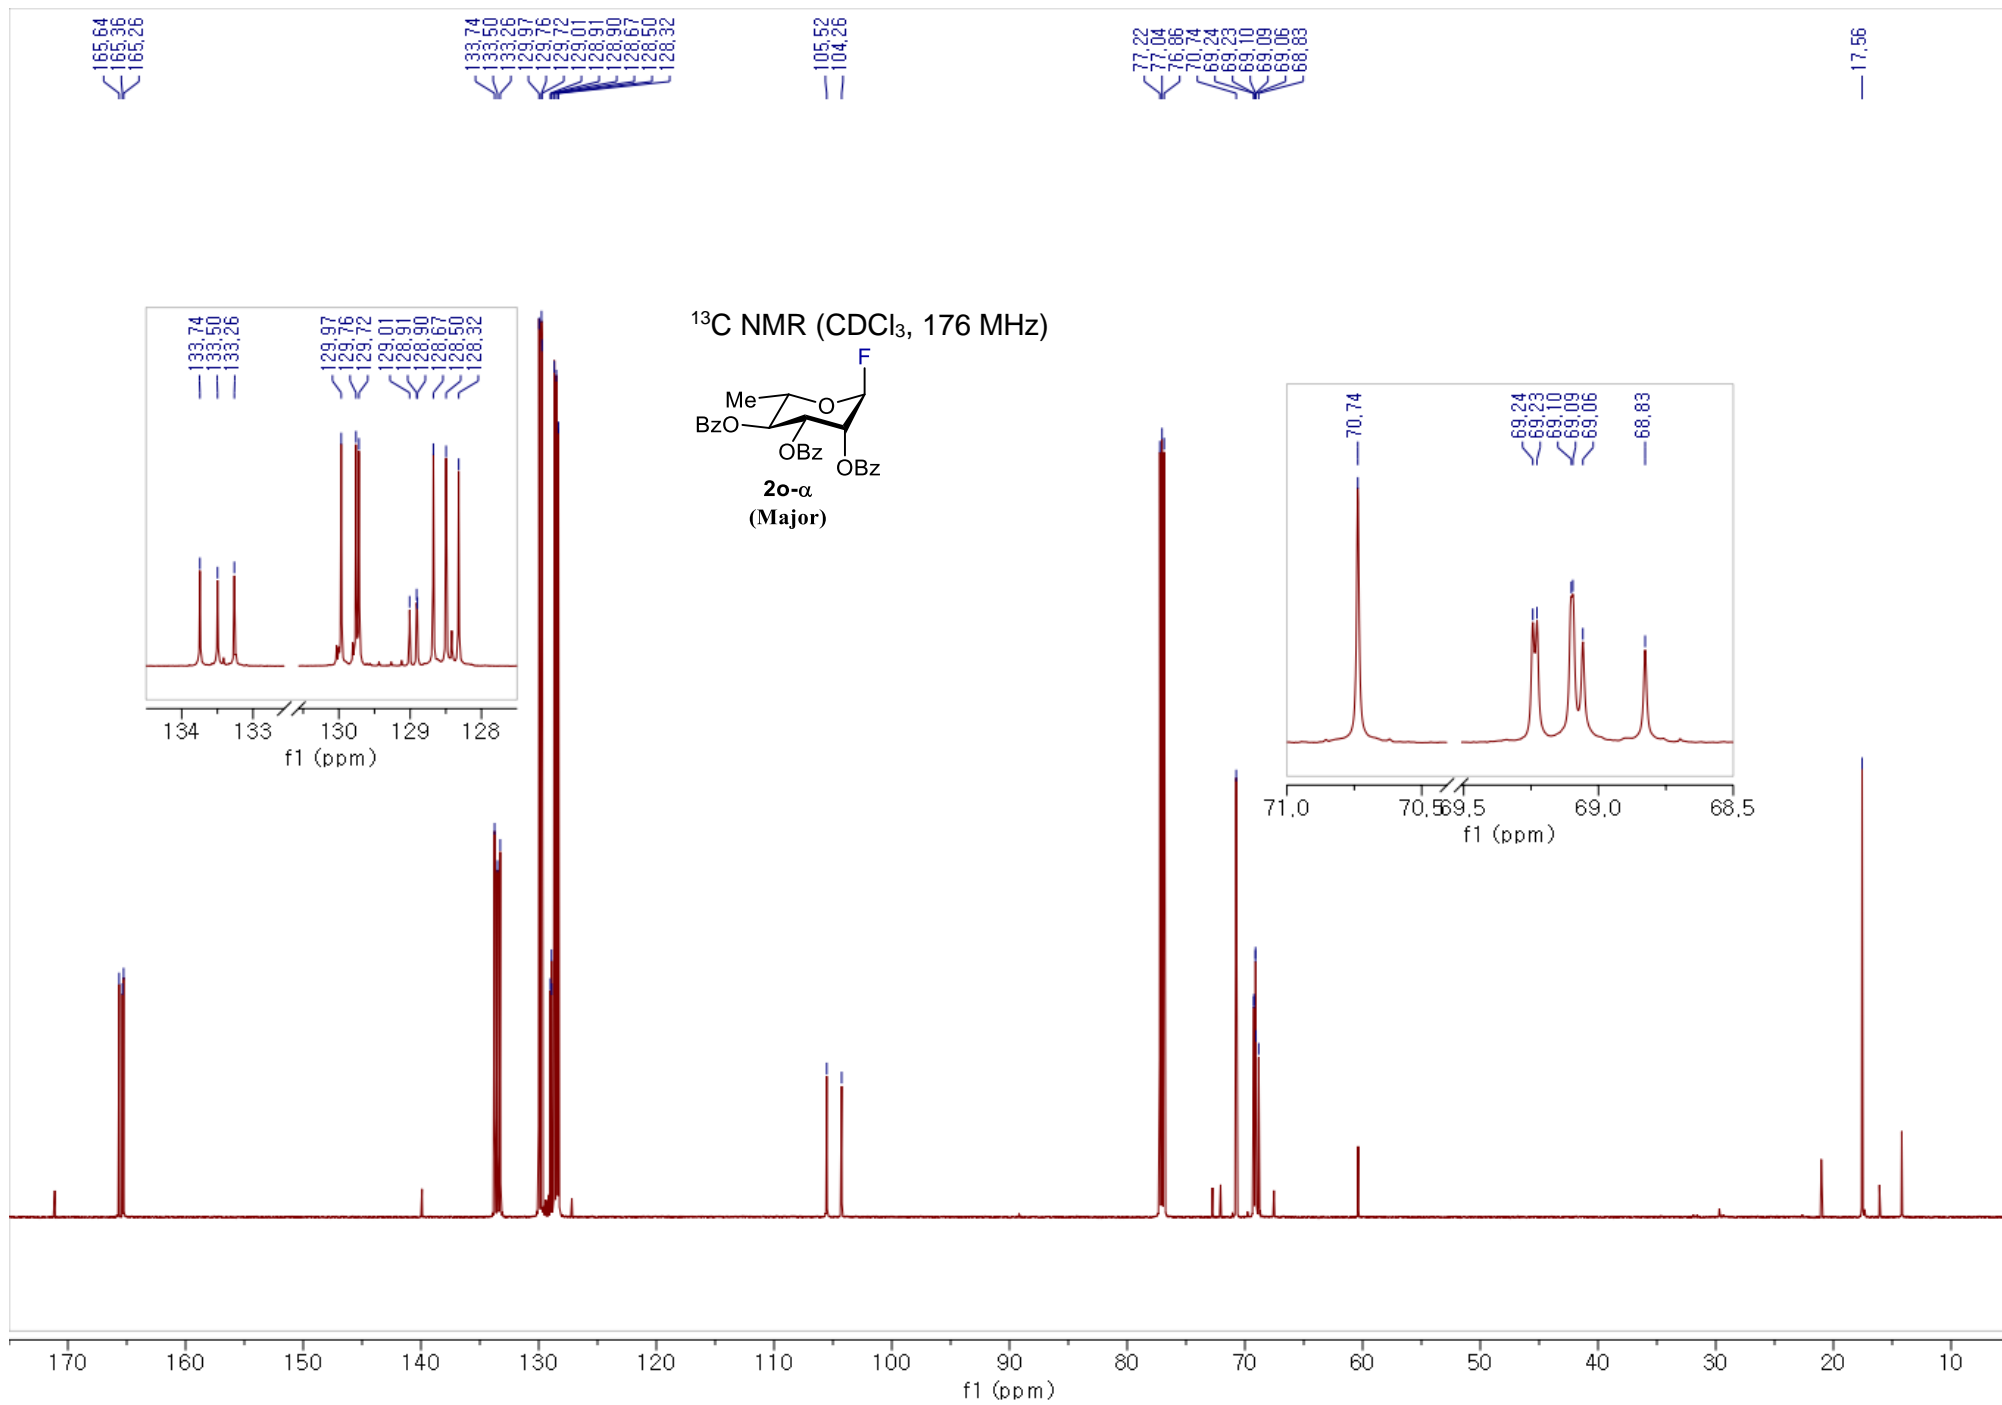

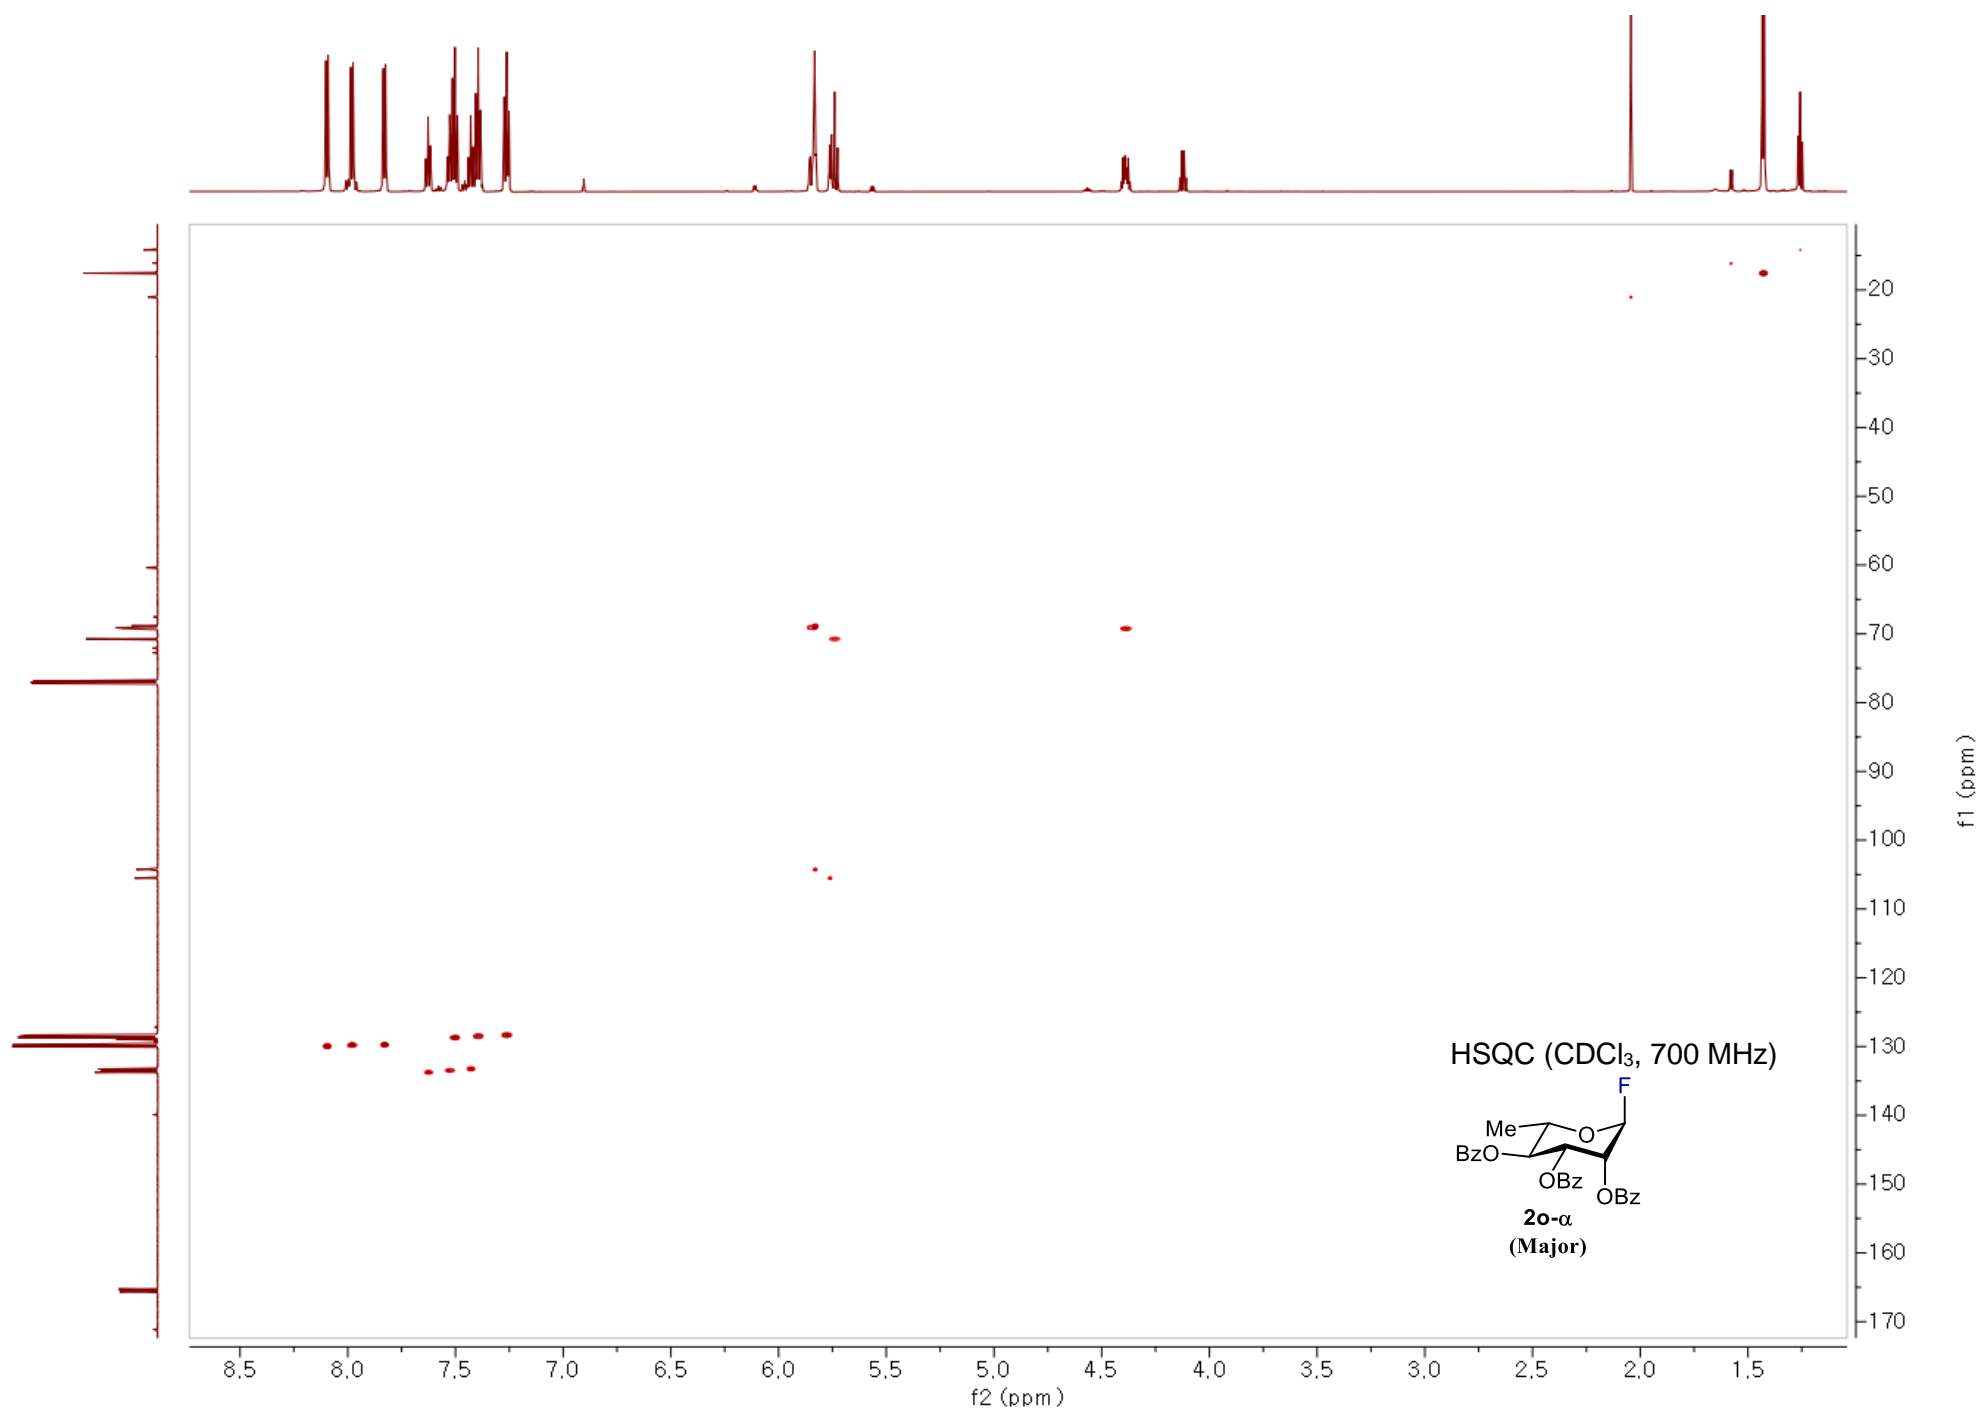

After Work-Up  
<sup>19</sup>F NMR (CDCl<sub>3</sub>, 471 MHz)

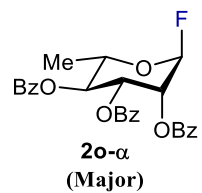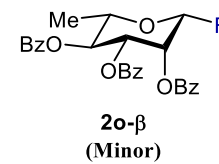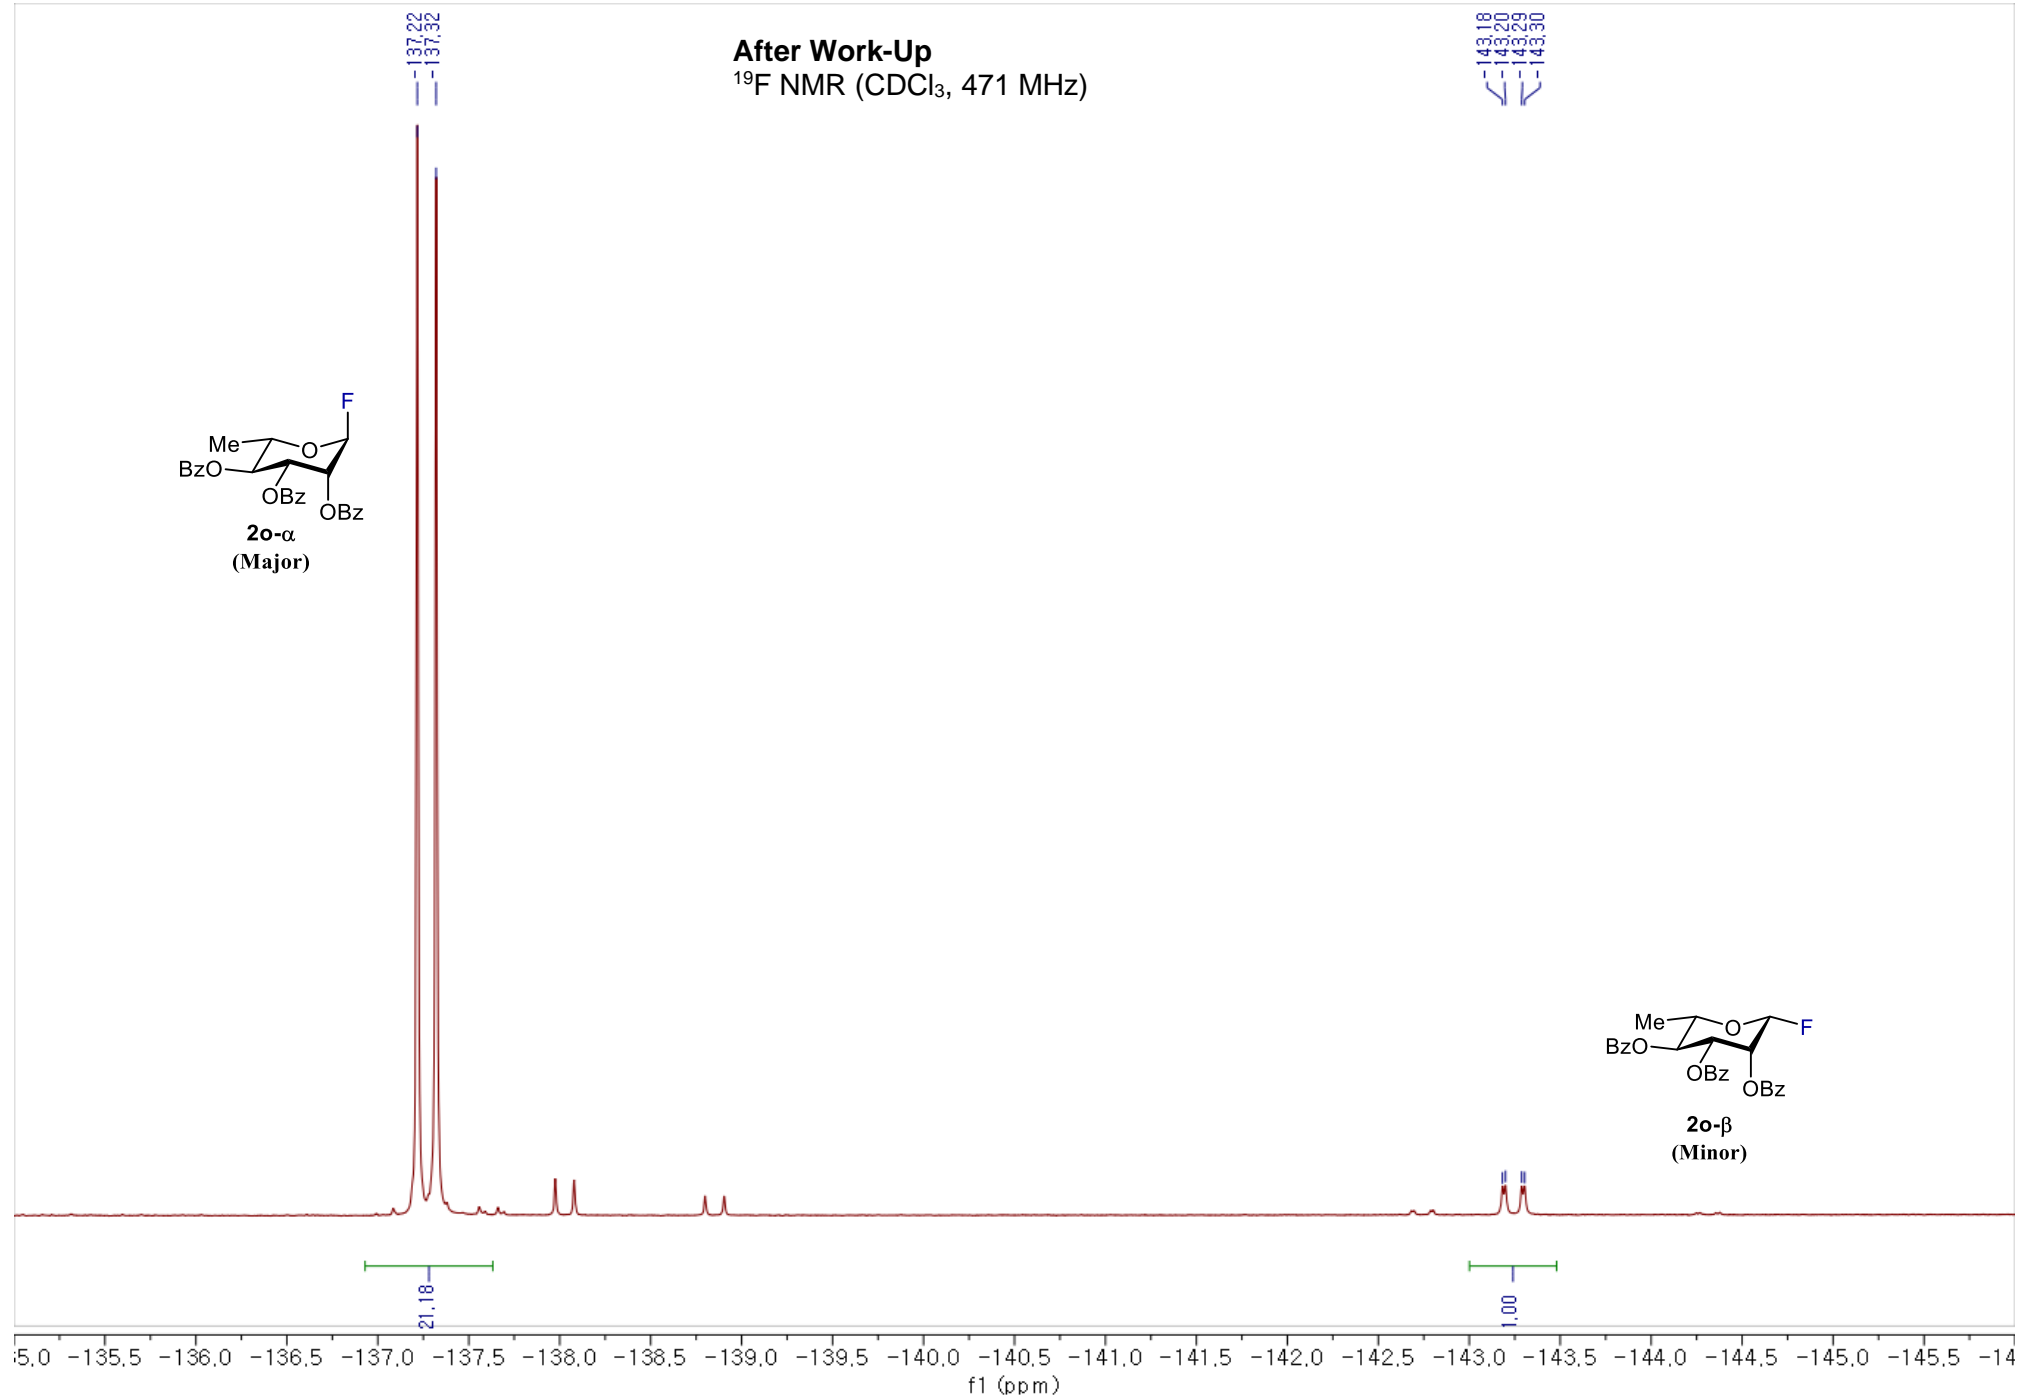

After Purification  
<sup>19</sup>F NMR (CDCl<sub>3</sub>, 564 MHz)

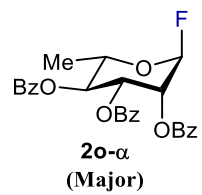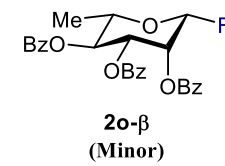

137.20  
137.21  
137.29

143.19  
143.20  
143.29

19.59

1.00

-135.5 -136.0 -136.5 -137.0 -137.5 -138.0 -138.5 -139.0 -139.5 -140.0 -140.5 -141.0 -141.5 -142.0 -142.5 -143.0 -143.5 -144.0 -144.5 -145.0 -145.5 -14

f1 (ppm)

# 2,3-Bis-O-(phenylmethyl)-4,6-O-[(R)-phenylmethylene]- $\alpha$ -D-mannopyranosyl fluoride (2p- $\alpha$ , Major diastereomer)

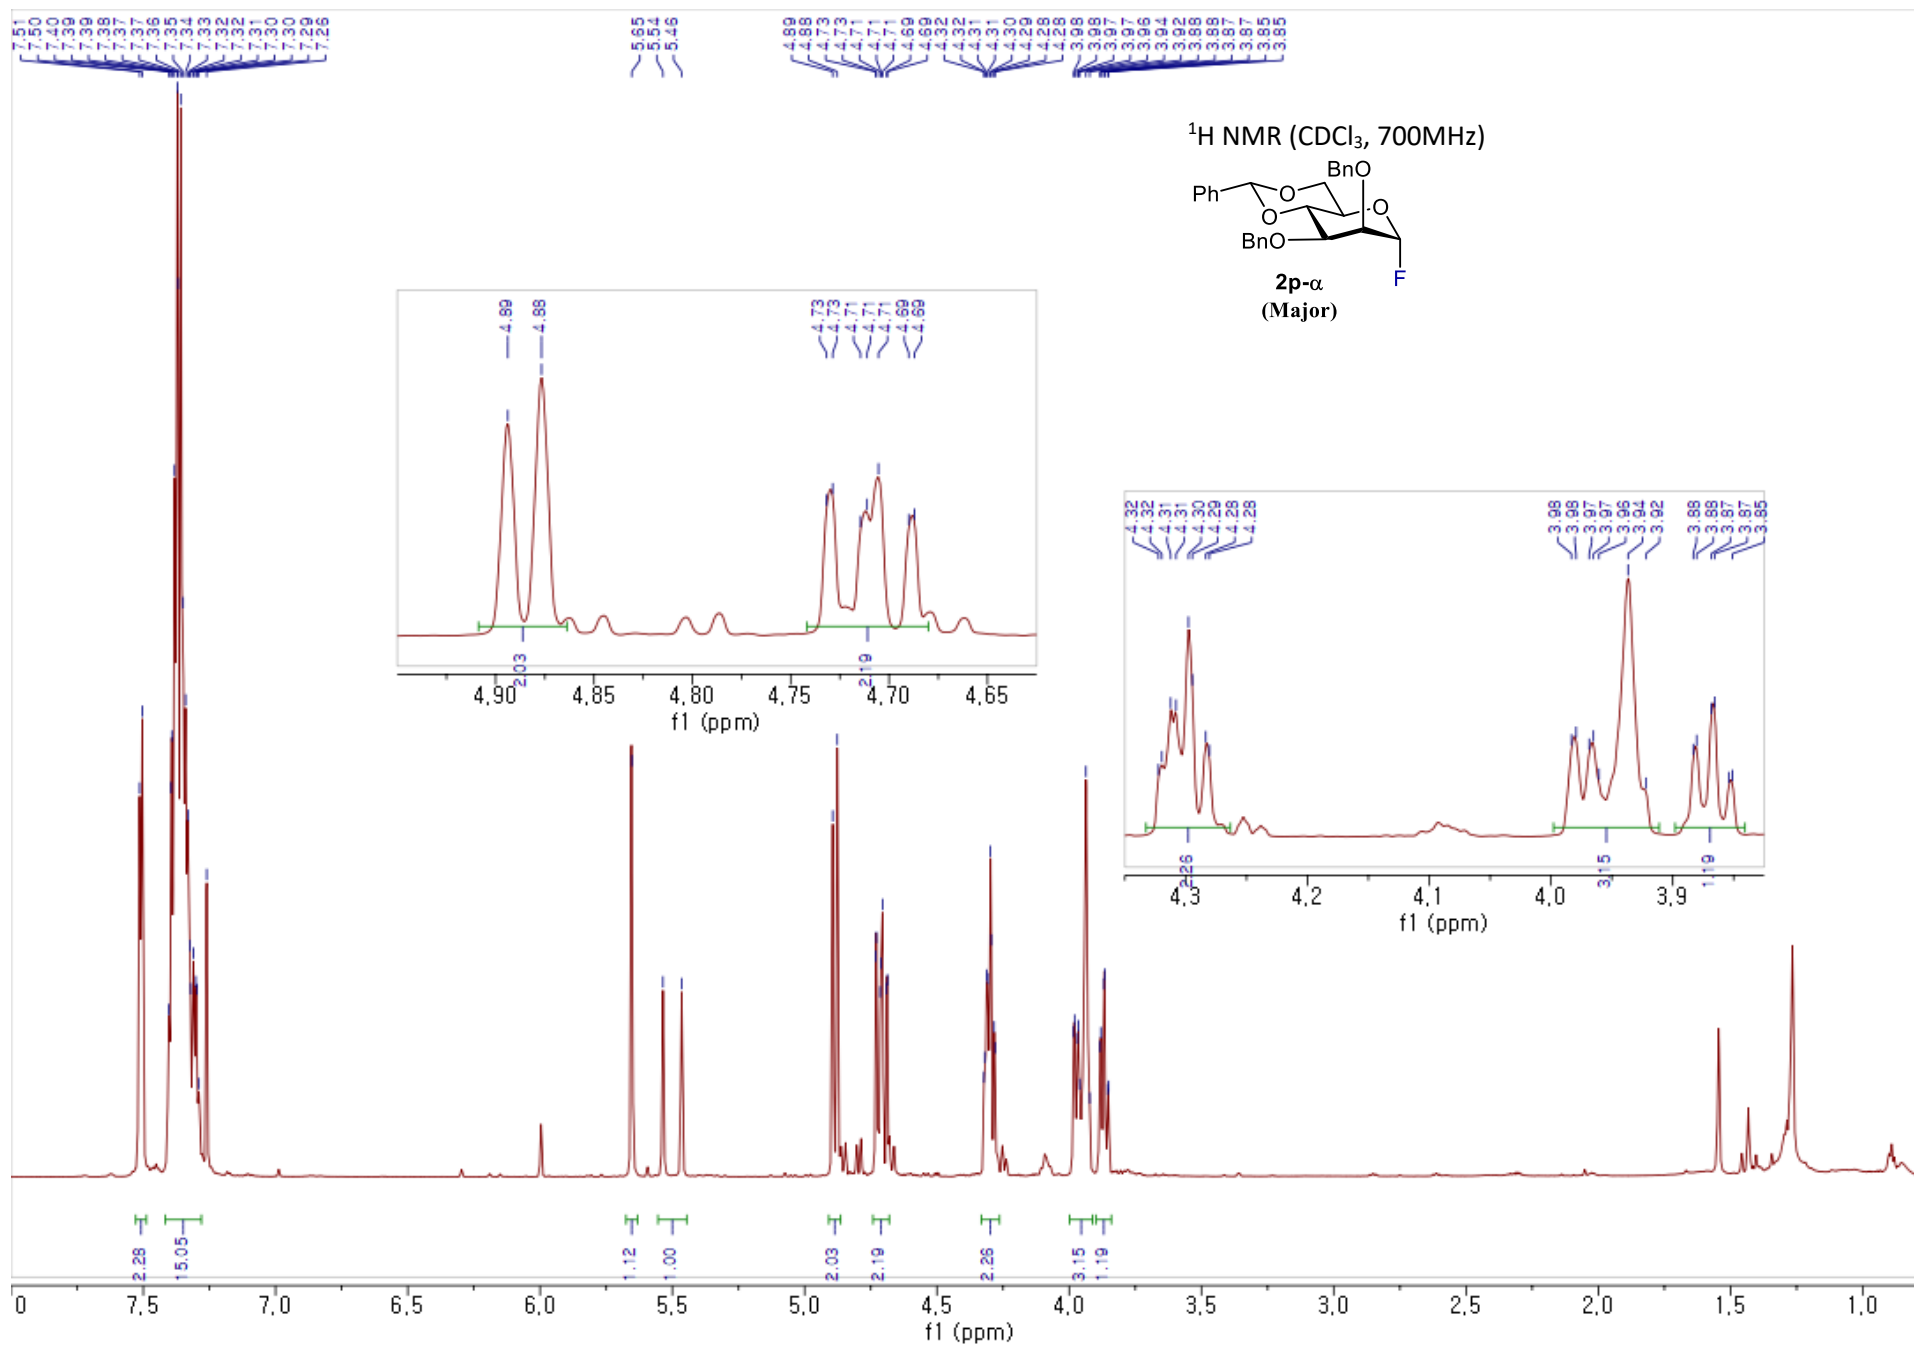

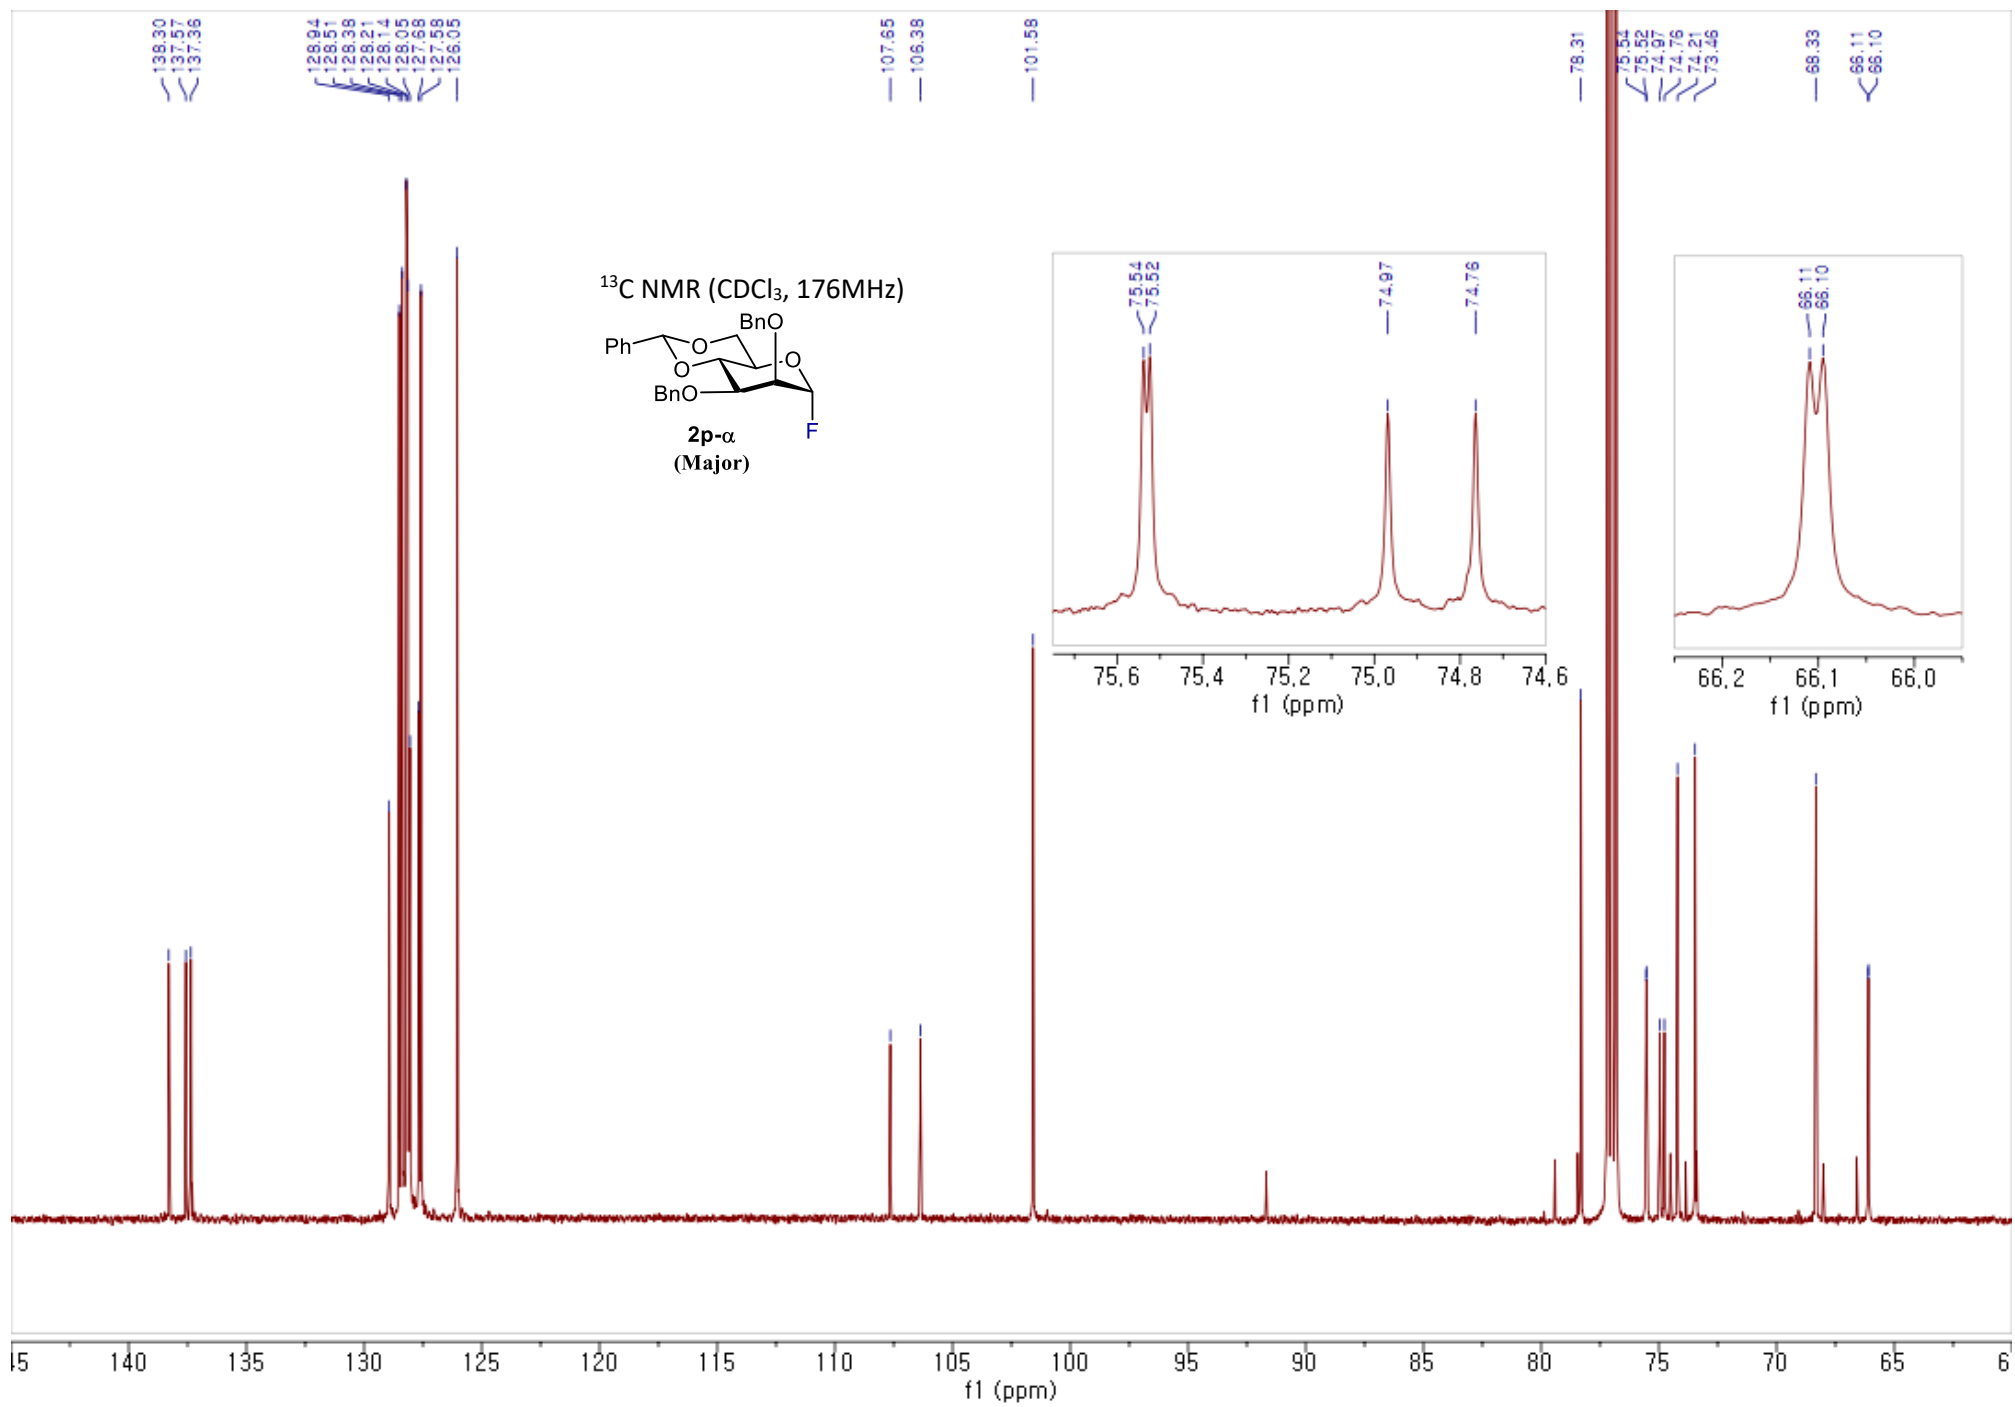

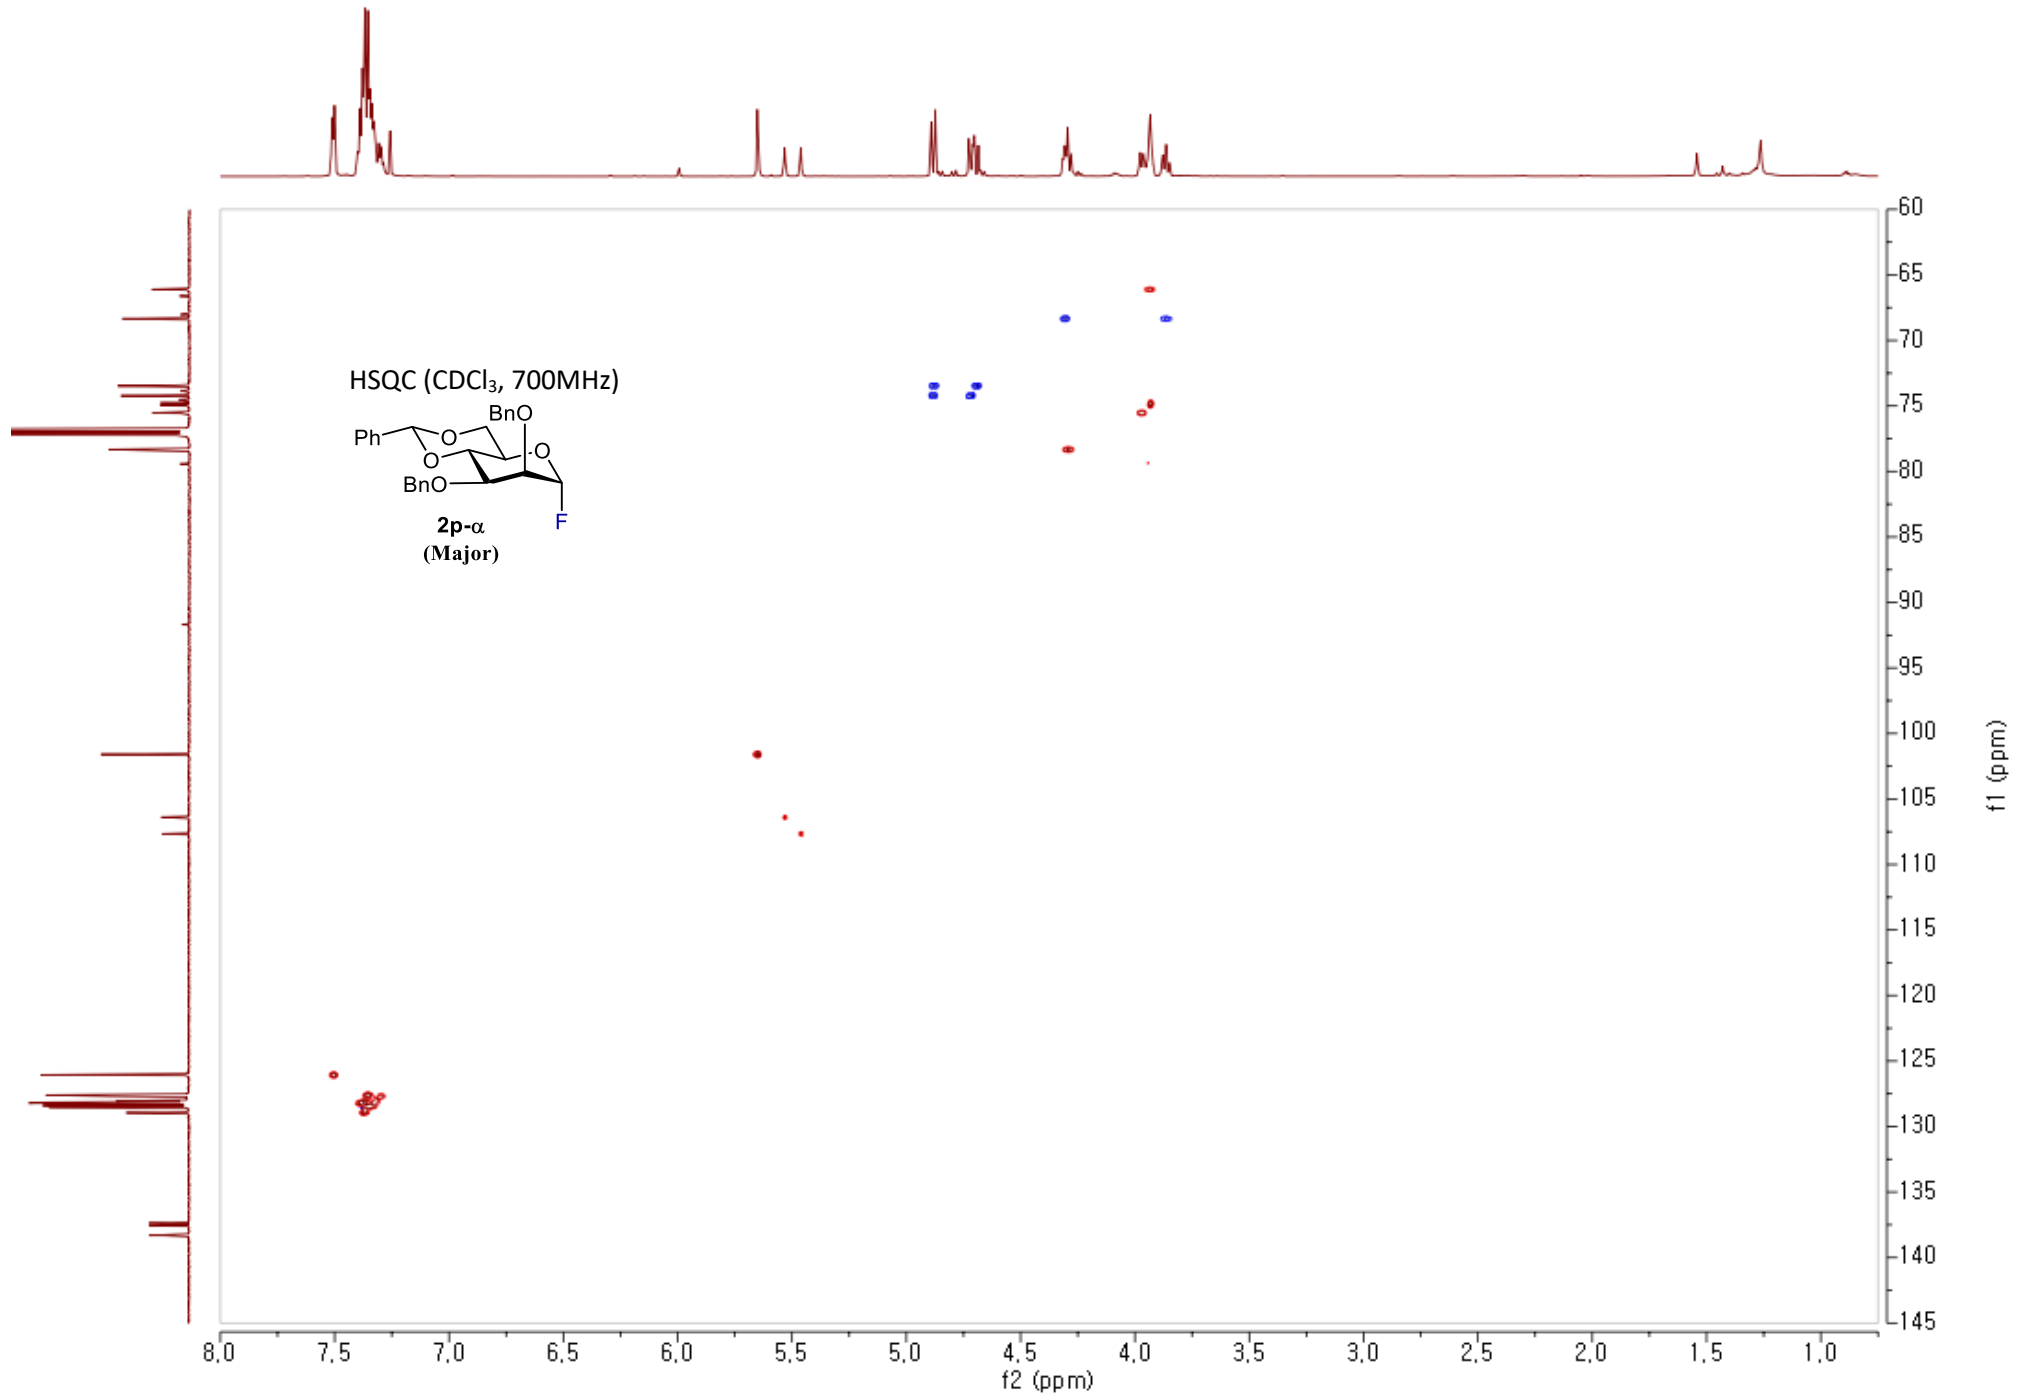

2,3-Bis-O-(phenylmethyl)-4,6-O-[(R)-phenylmethylene]- $\beta$ -D-mannopyranosyl fluoride (2p- $\beta$ , Minor diastereomer)

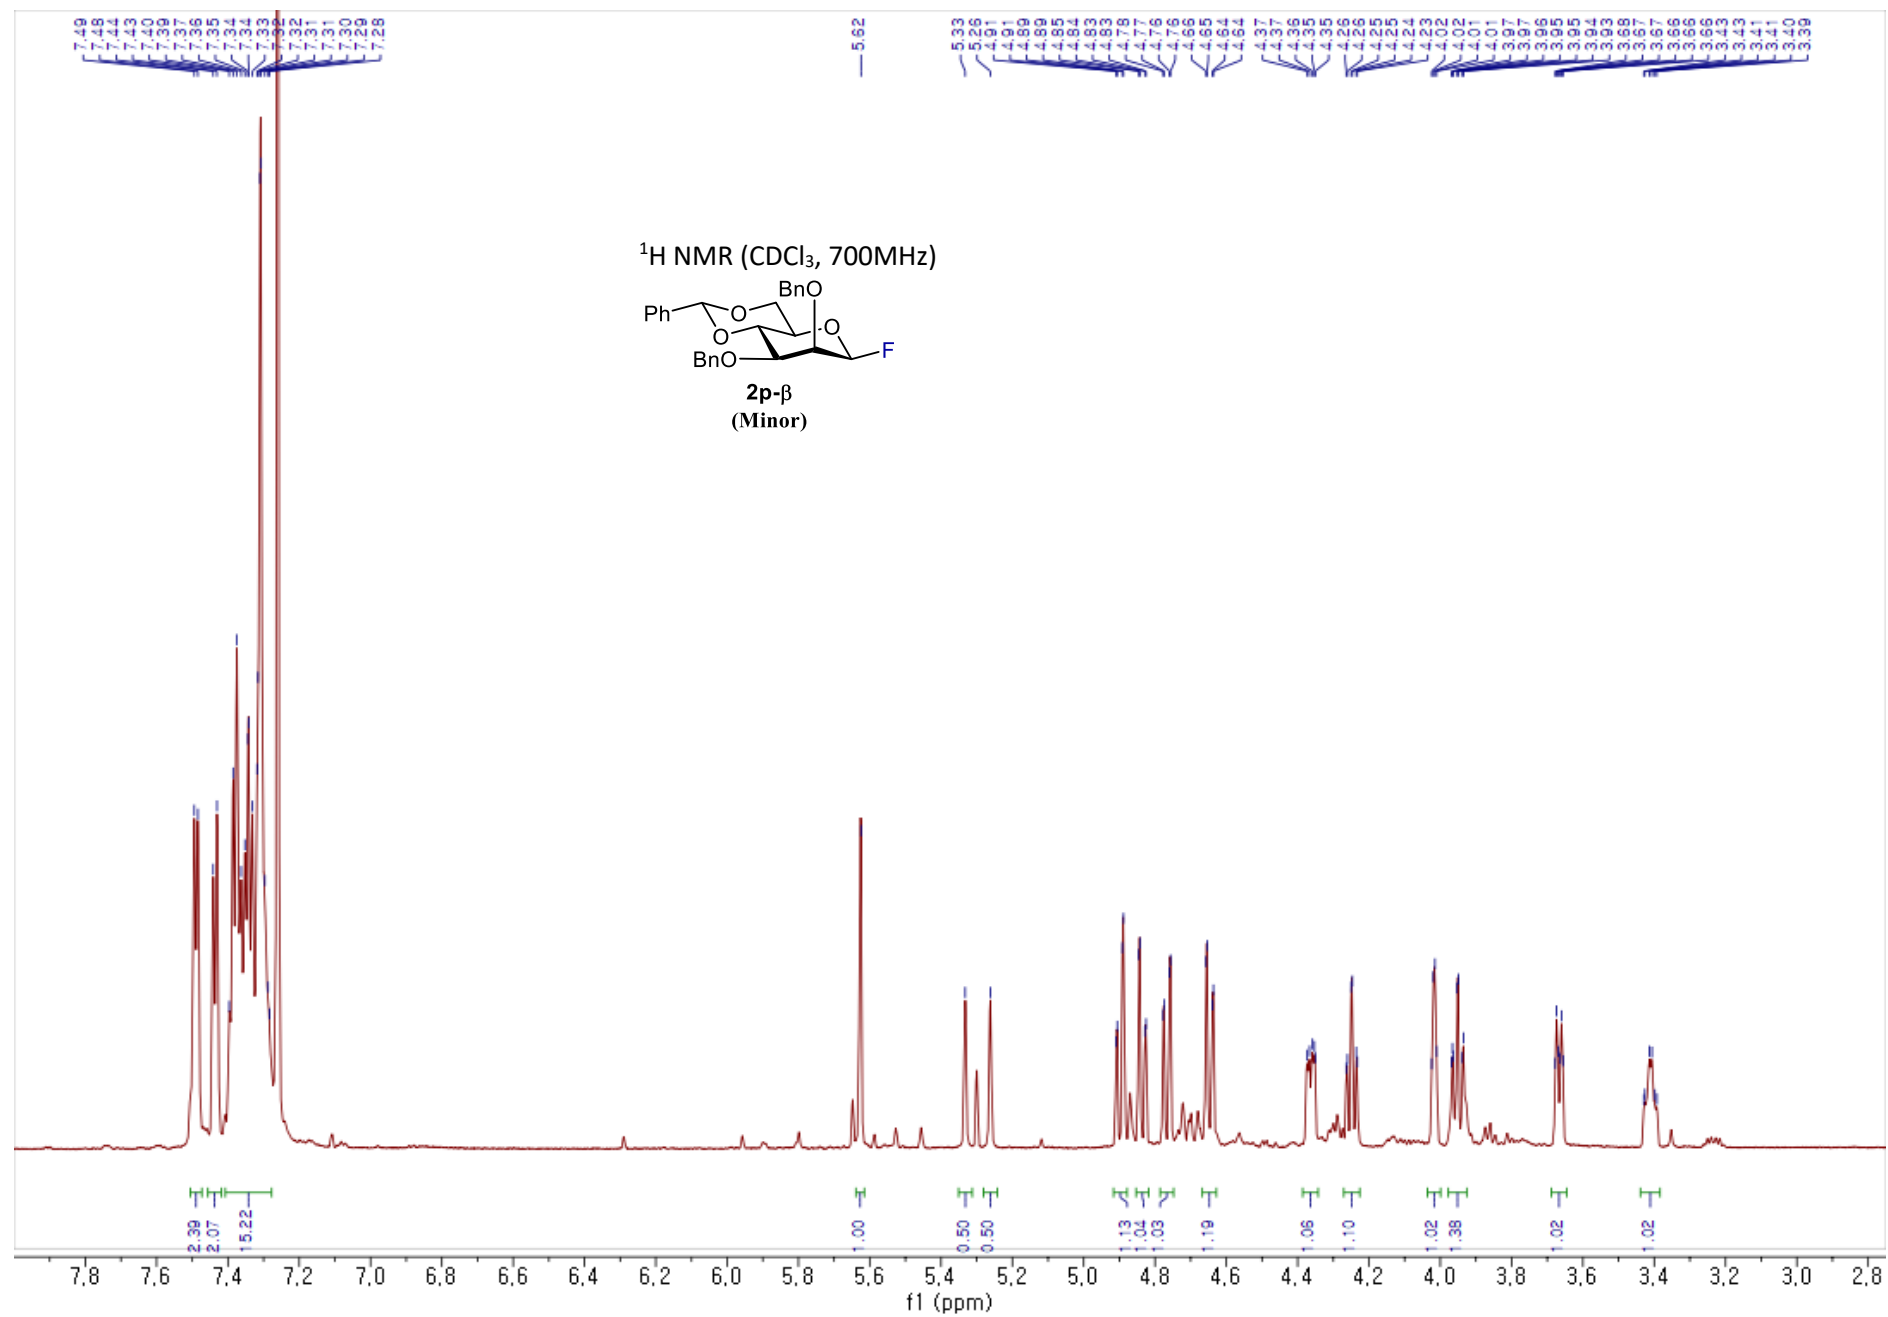



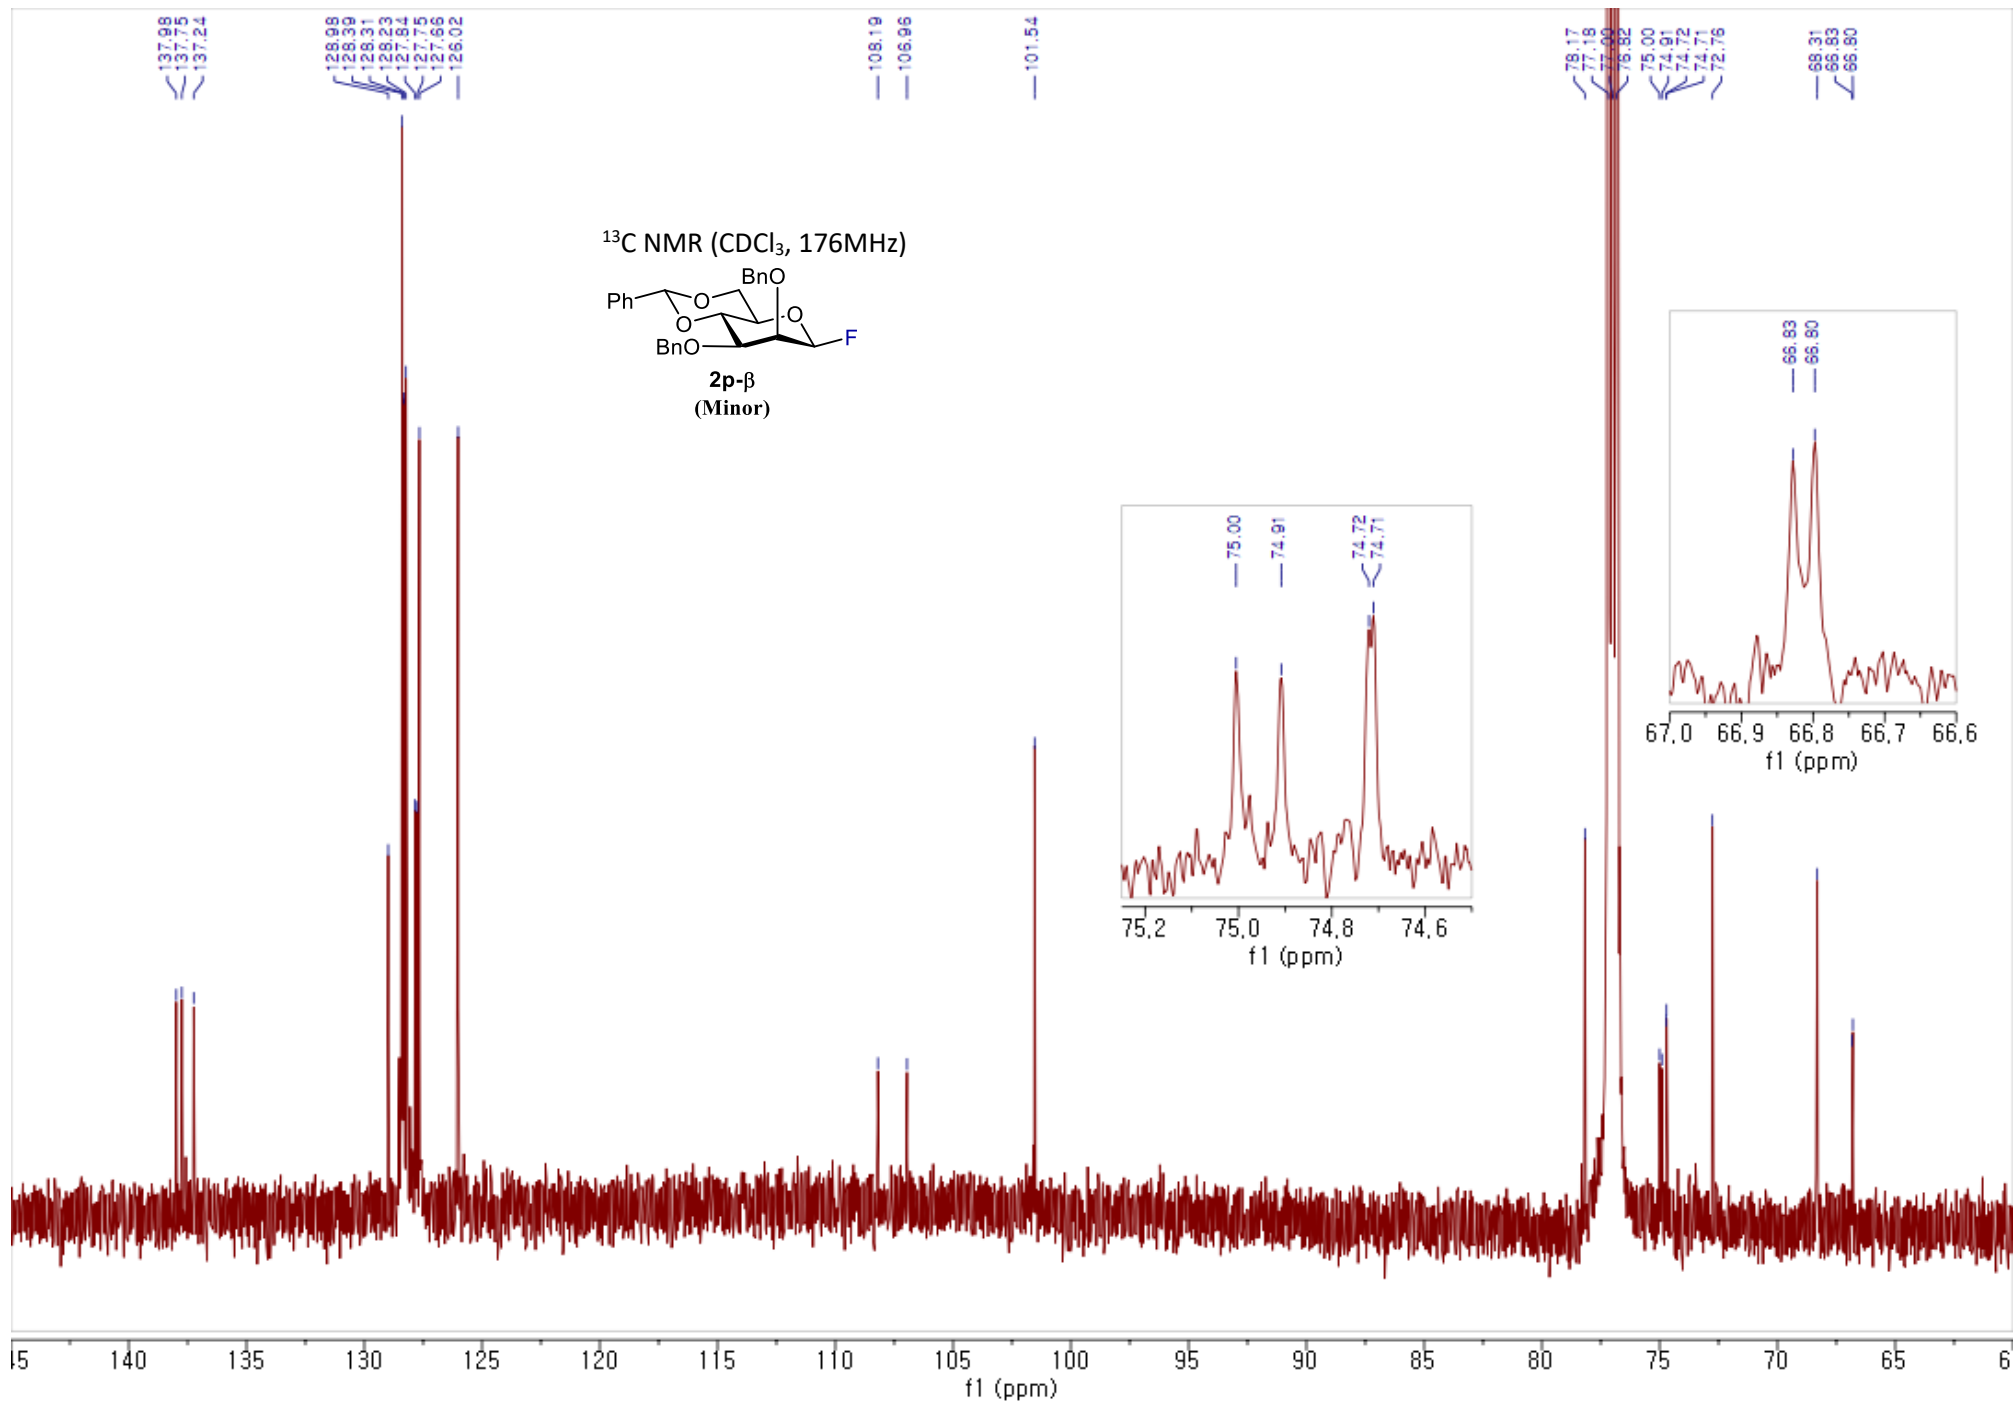

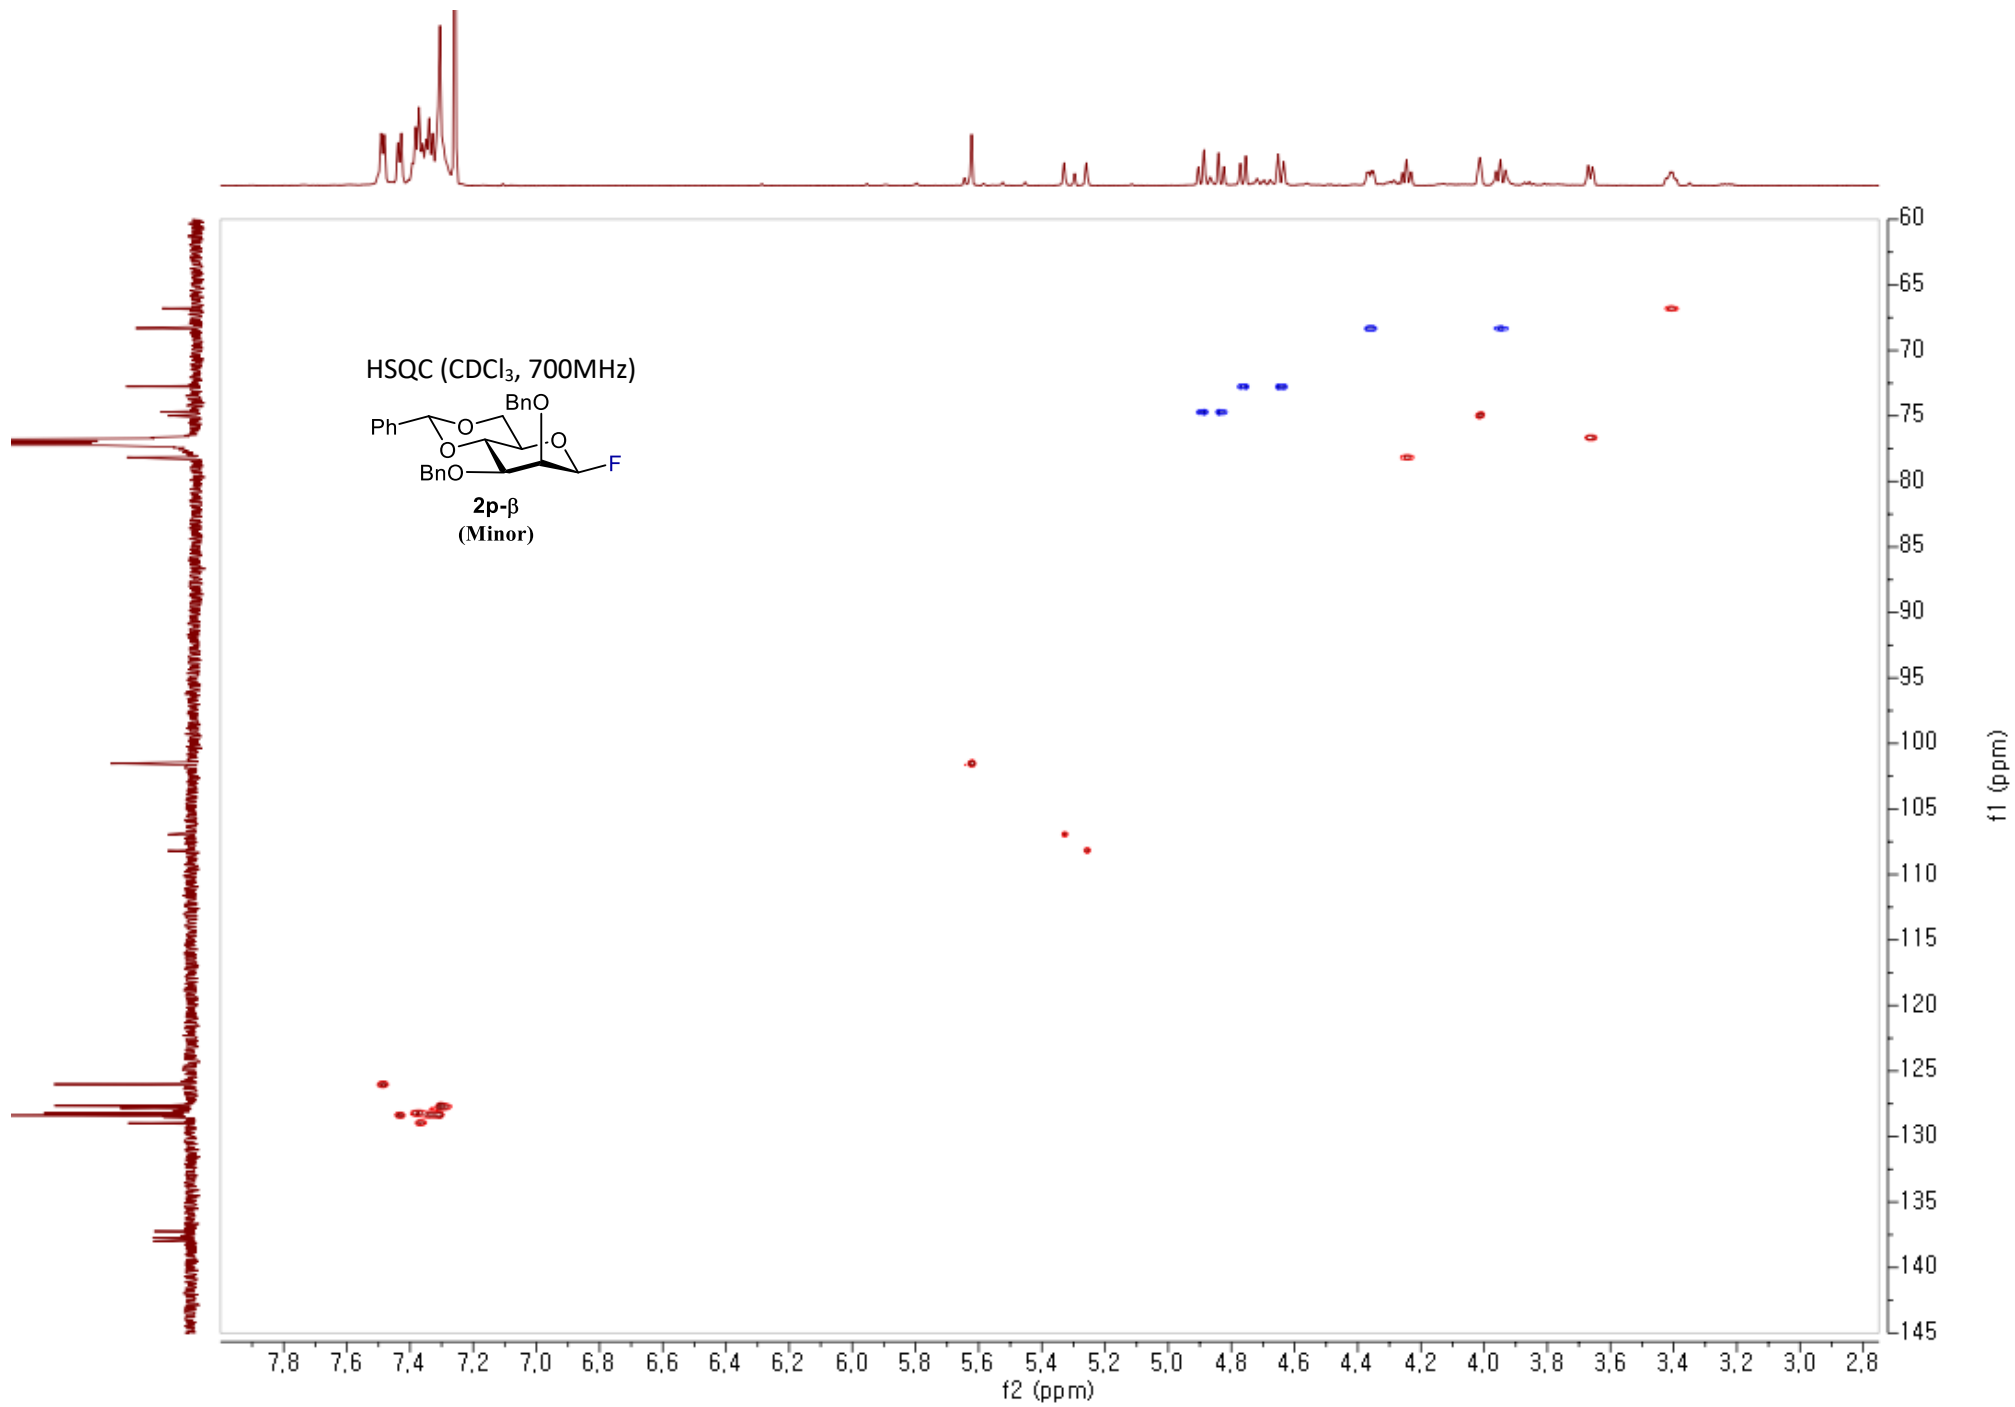

After Work-Up

$^{19}\text{F}$  NMR ( $\text{CDCl}_3$ , 564 MHz)

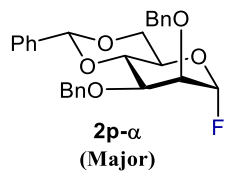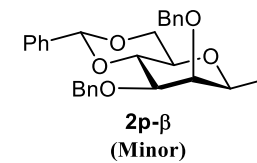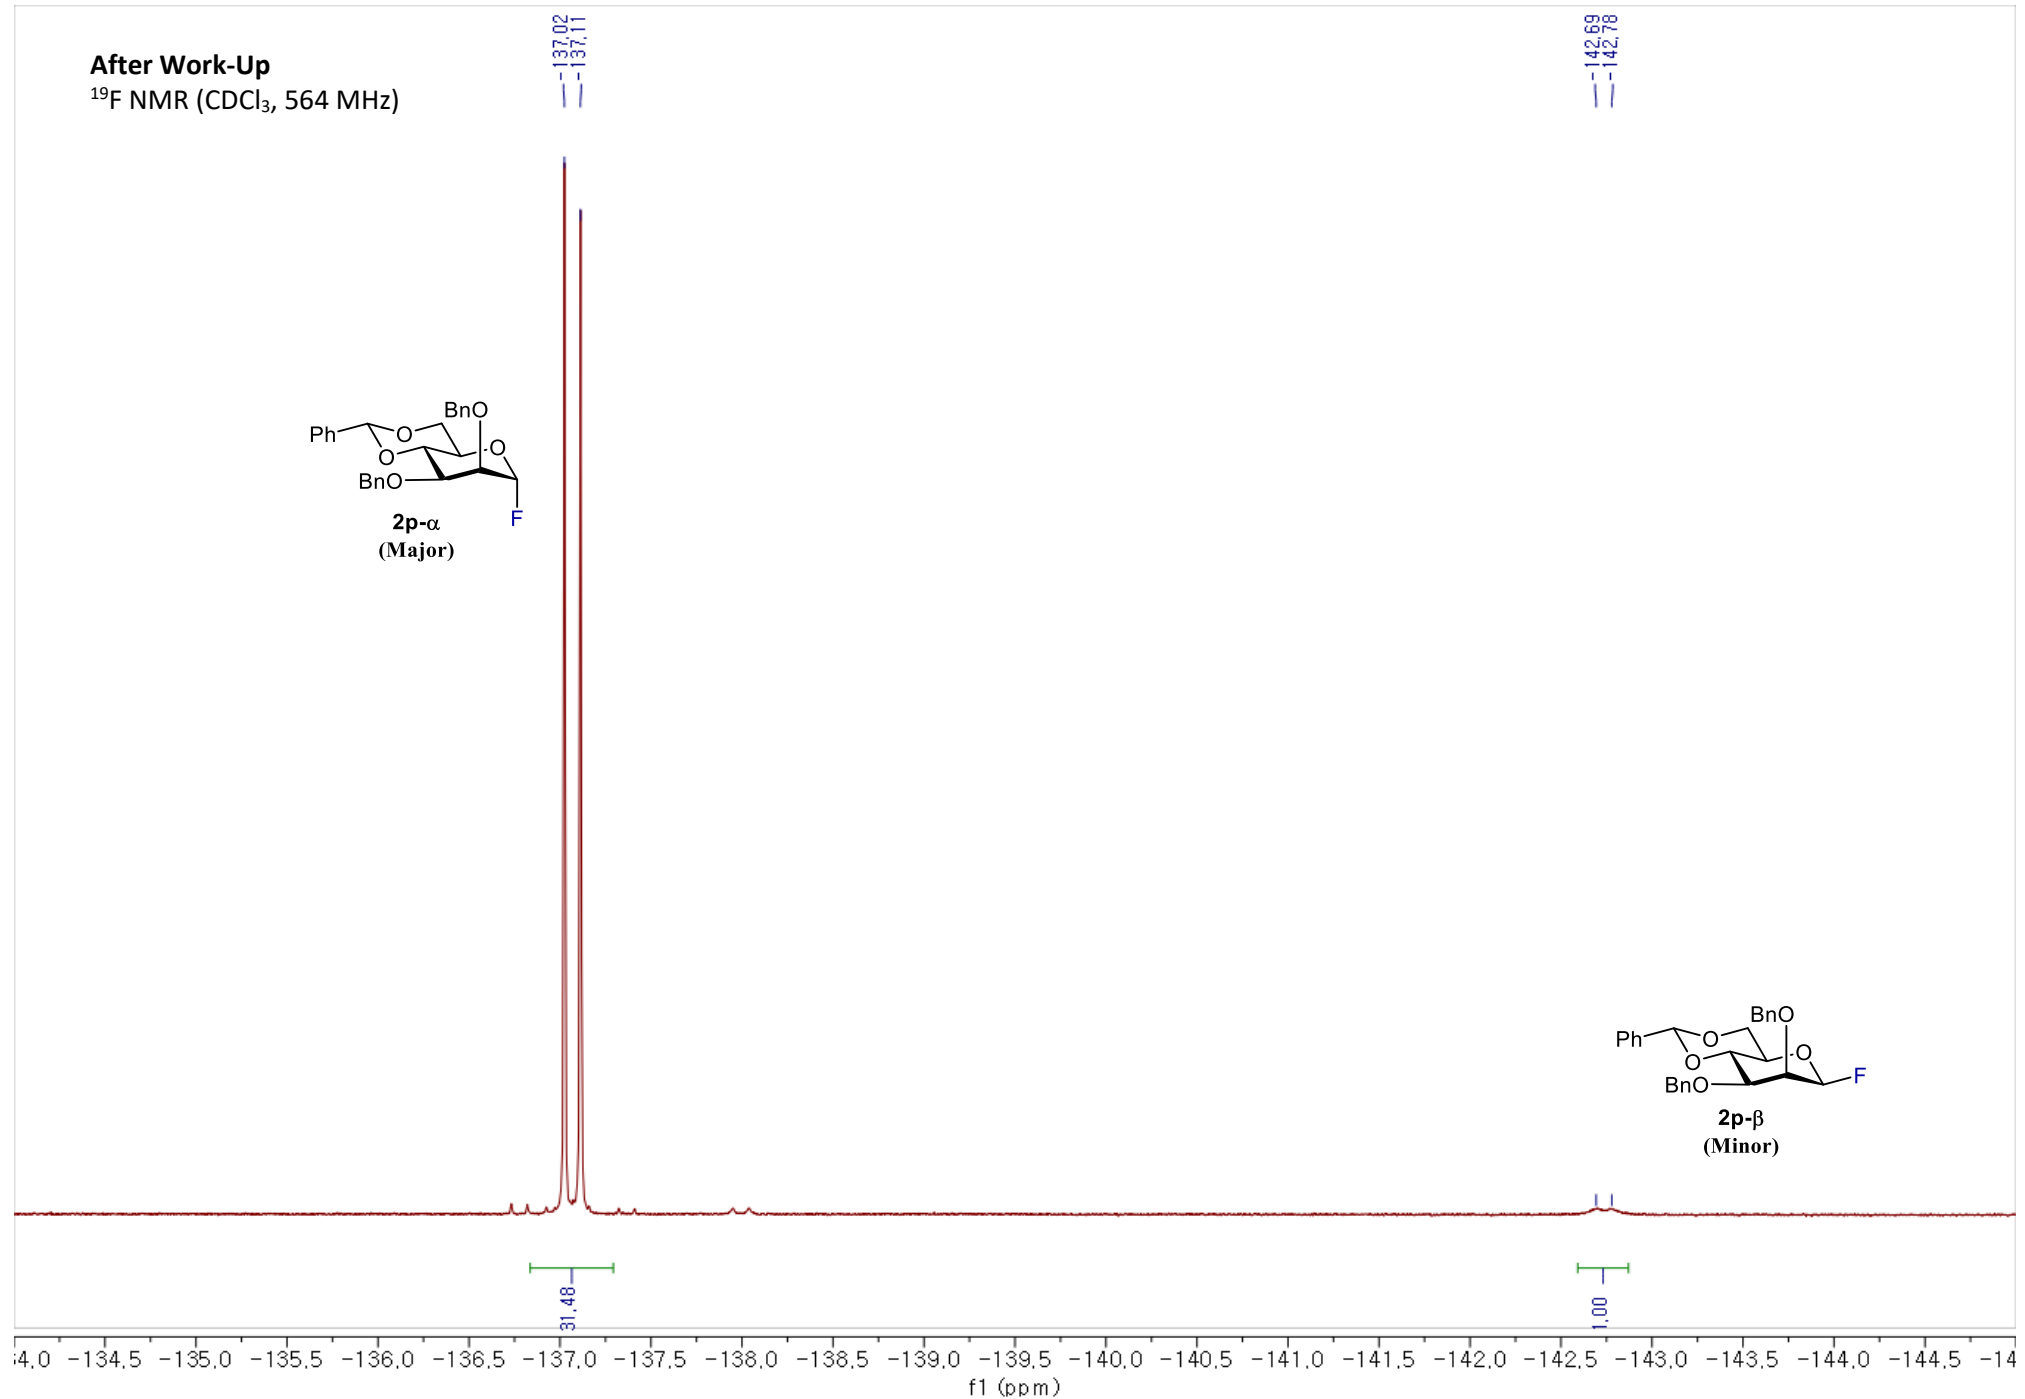

After Purification

$^{19}\text{F}$  NMR ( $\text{CDCl}_3$ , 564 MHz)

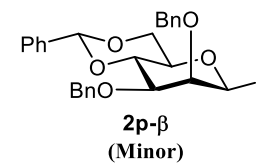

136.98  
137.07

142.67  
142.76

27.56

1.00

-134.0 -134.5 -135.0 -135.5 -136.0 -136.5 -137.0 -137.5 -138.0 -138.5 -139.0 -139.5 -140.0 -140.5 -141.0 -141.5 -142.0 -142.5 -143.0 -143.5 -144.0 -144.5 -14

f1 (ppm)

2,3,6-Tris-O-(phenylmethyl)-4-O-[2,3,4,6-tetrakis-O-(phenylmethyl)-β-D-glucopyranosyl]-β-D-glucopyranosyl fluoride (2q-β, Major diastereomer)

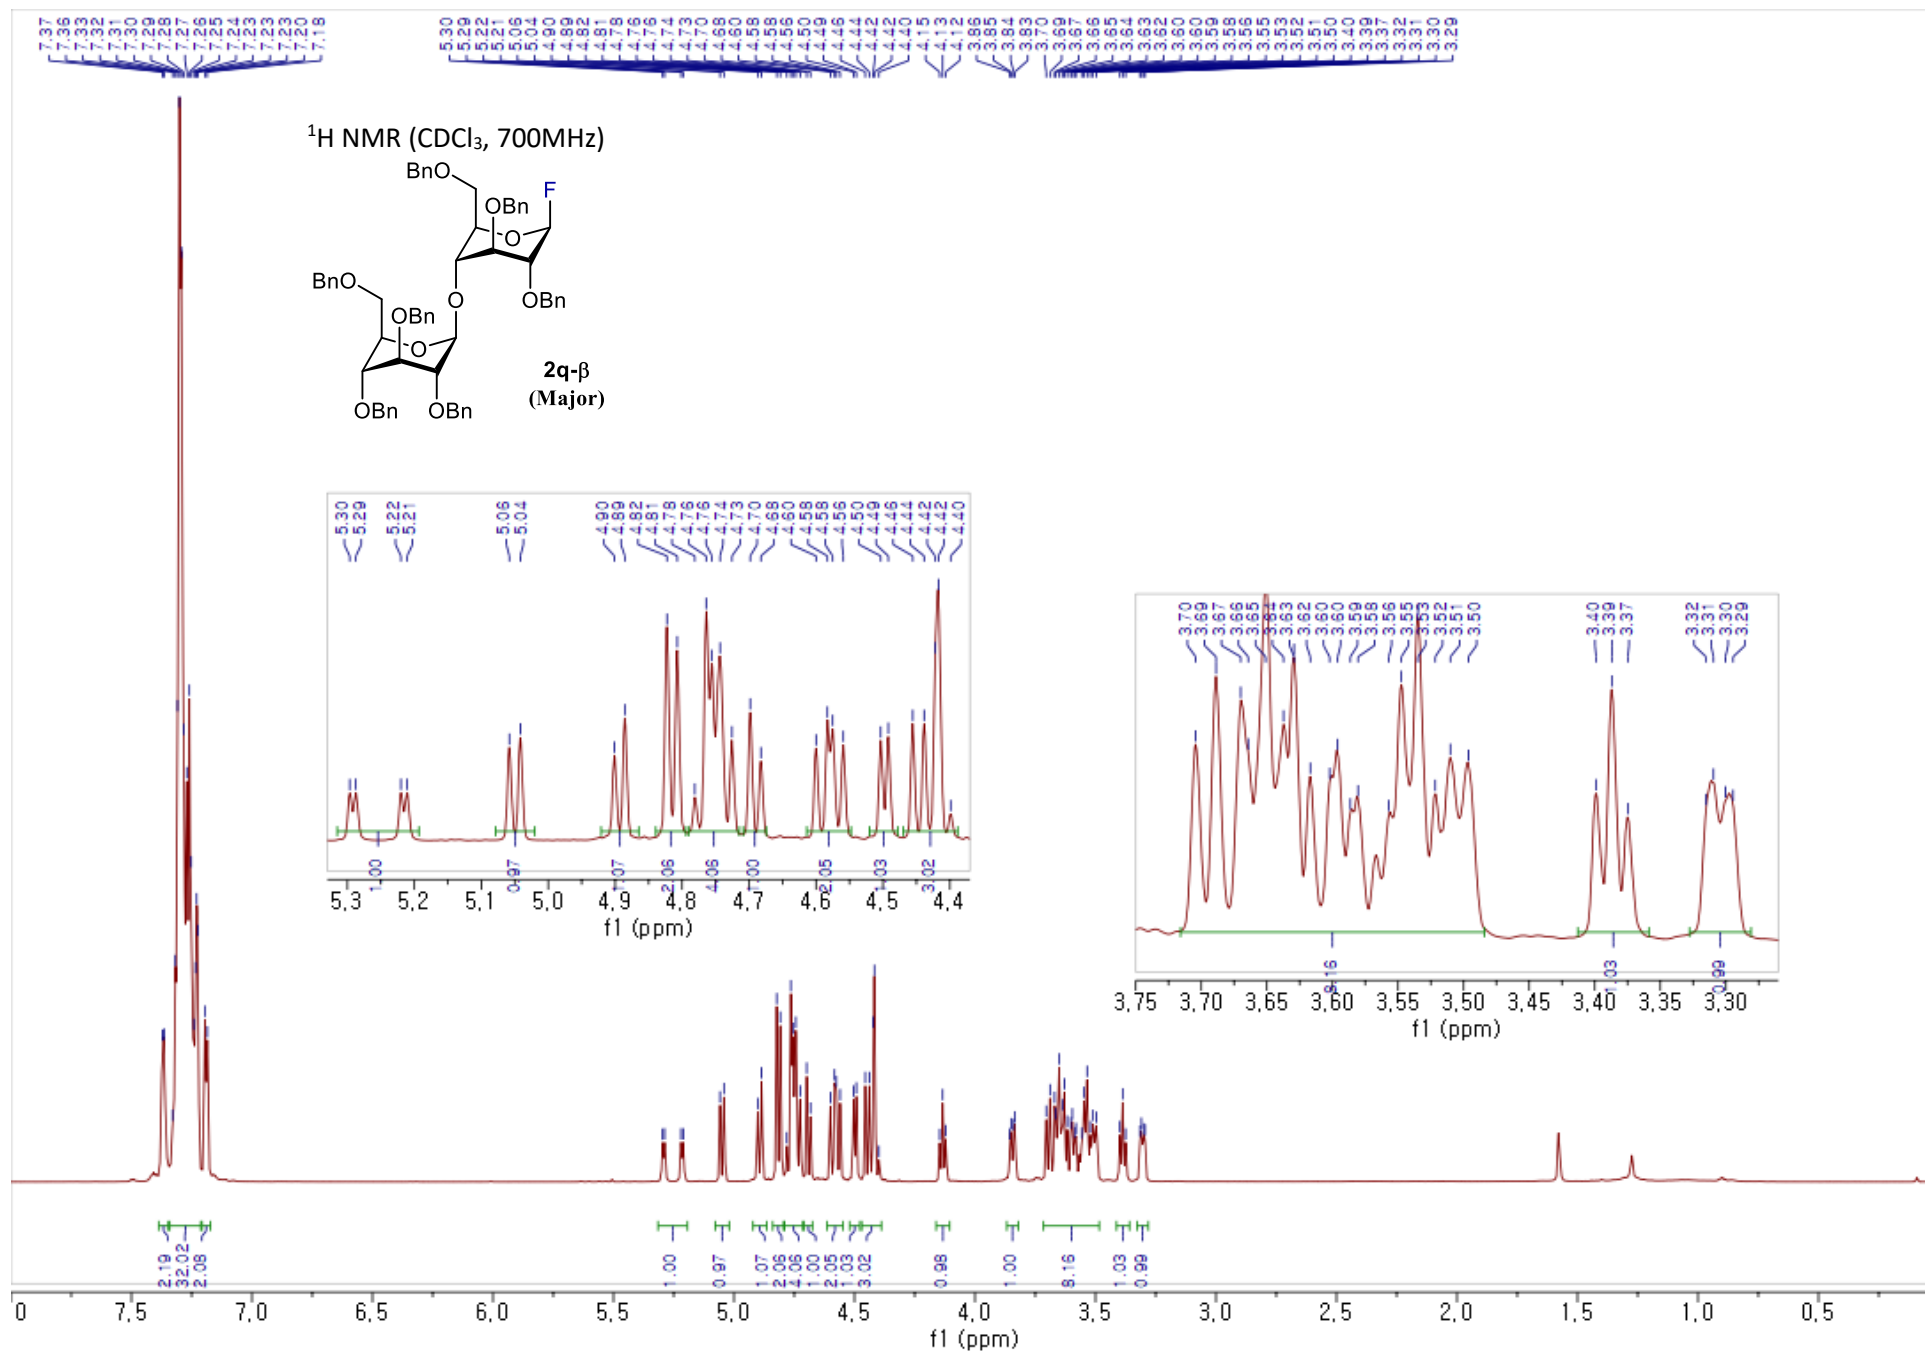

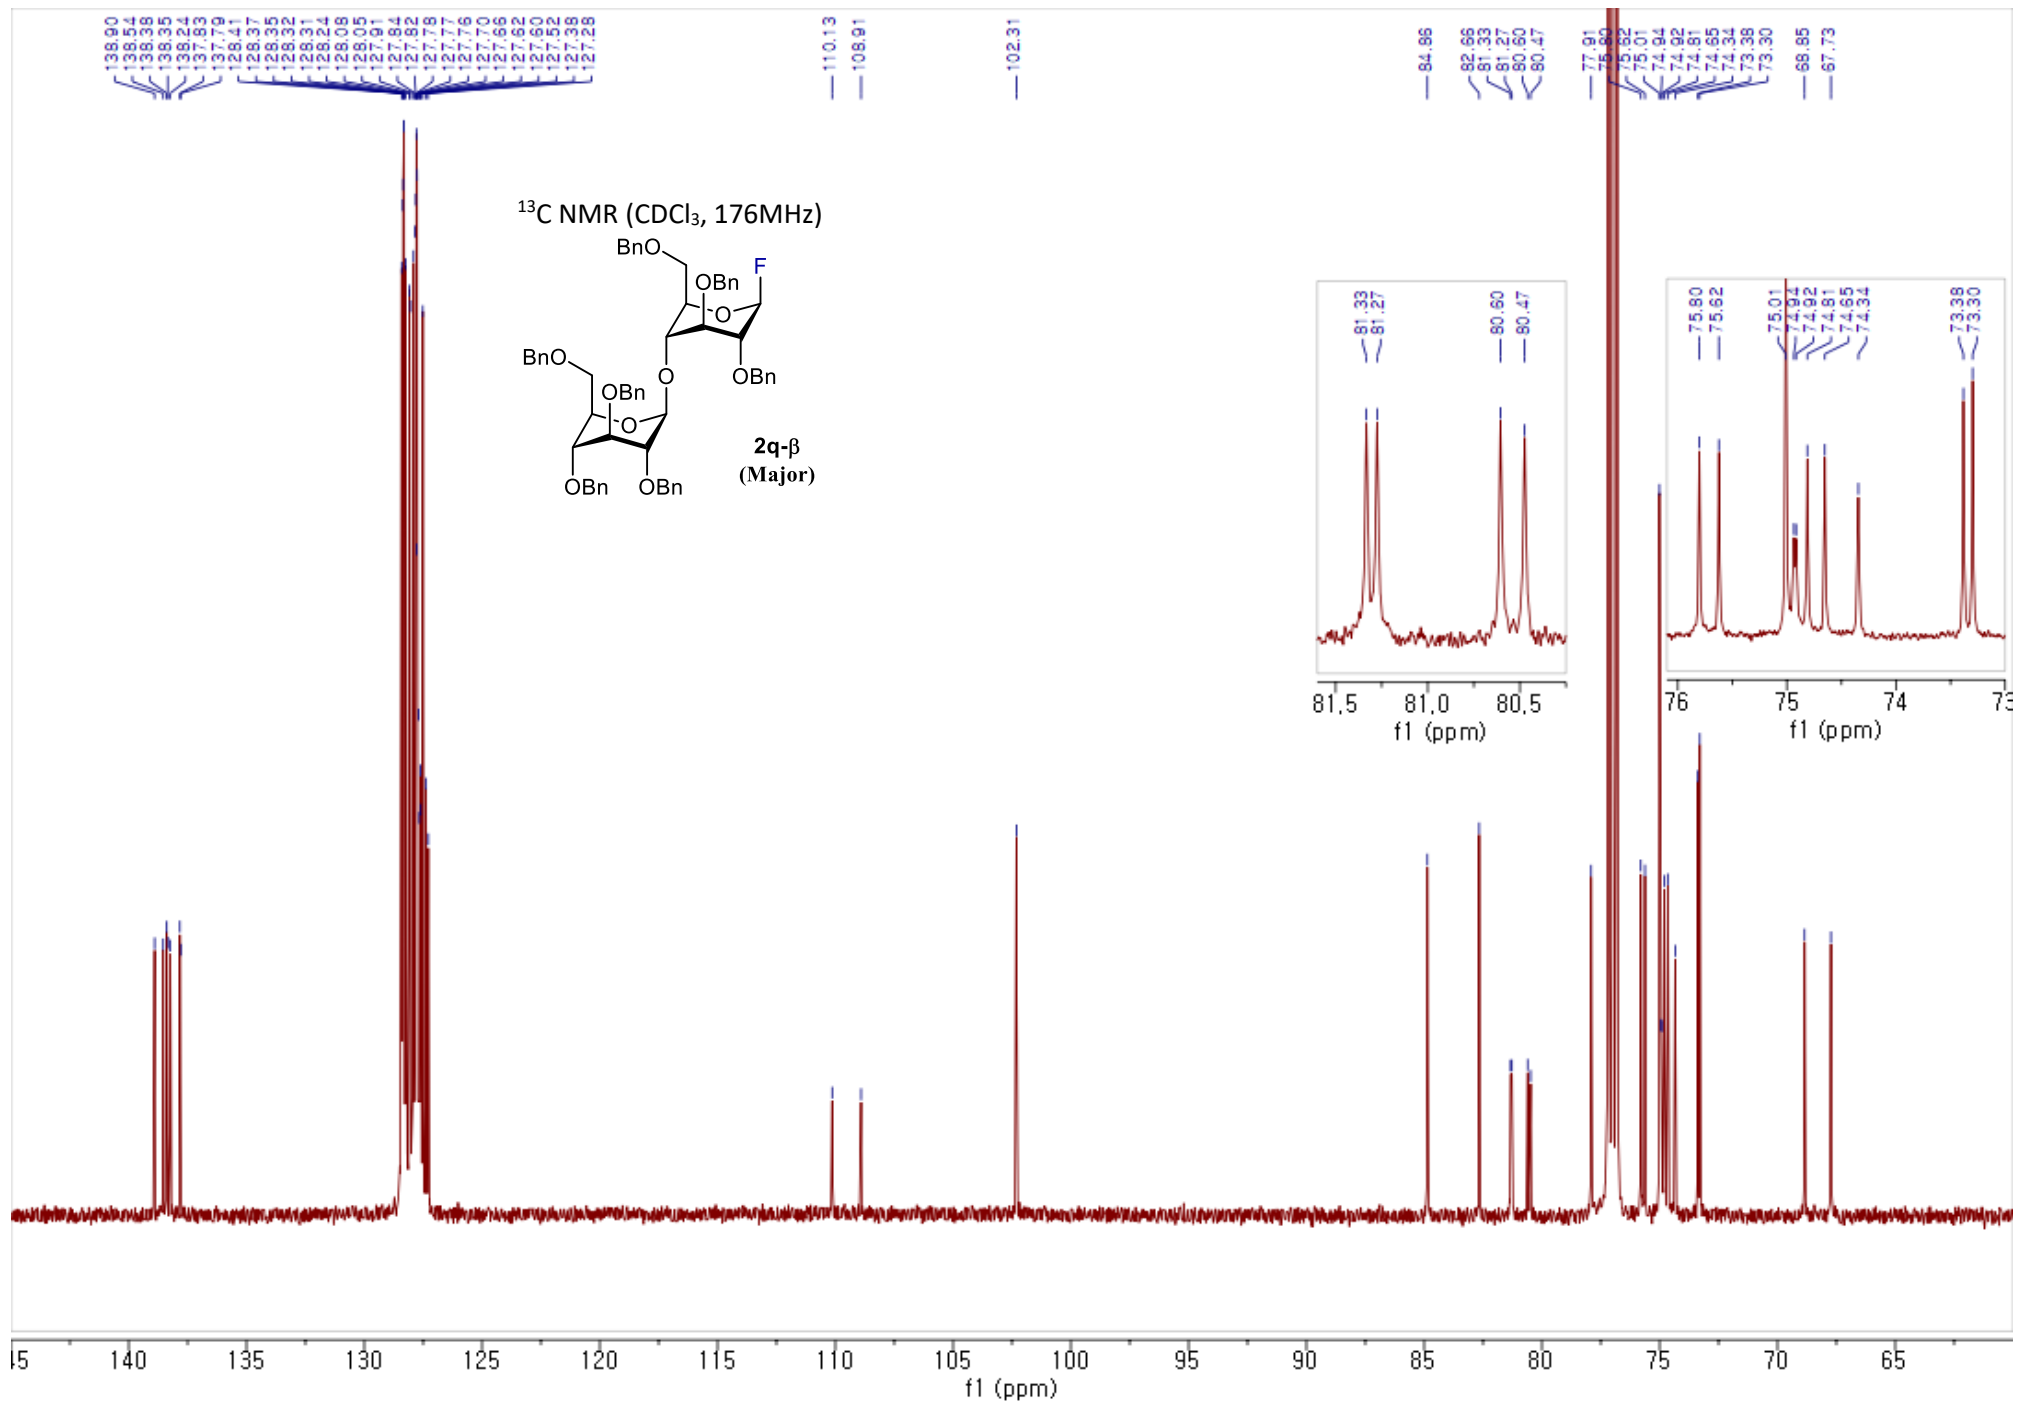

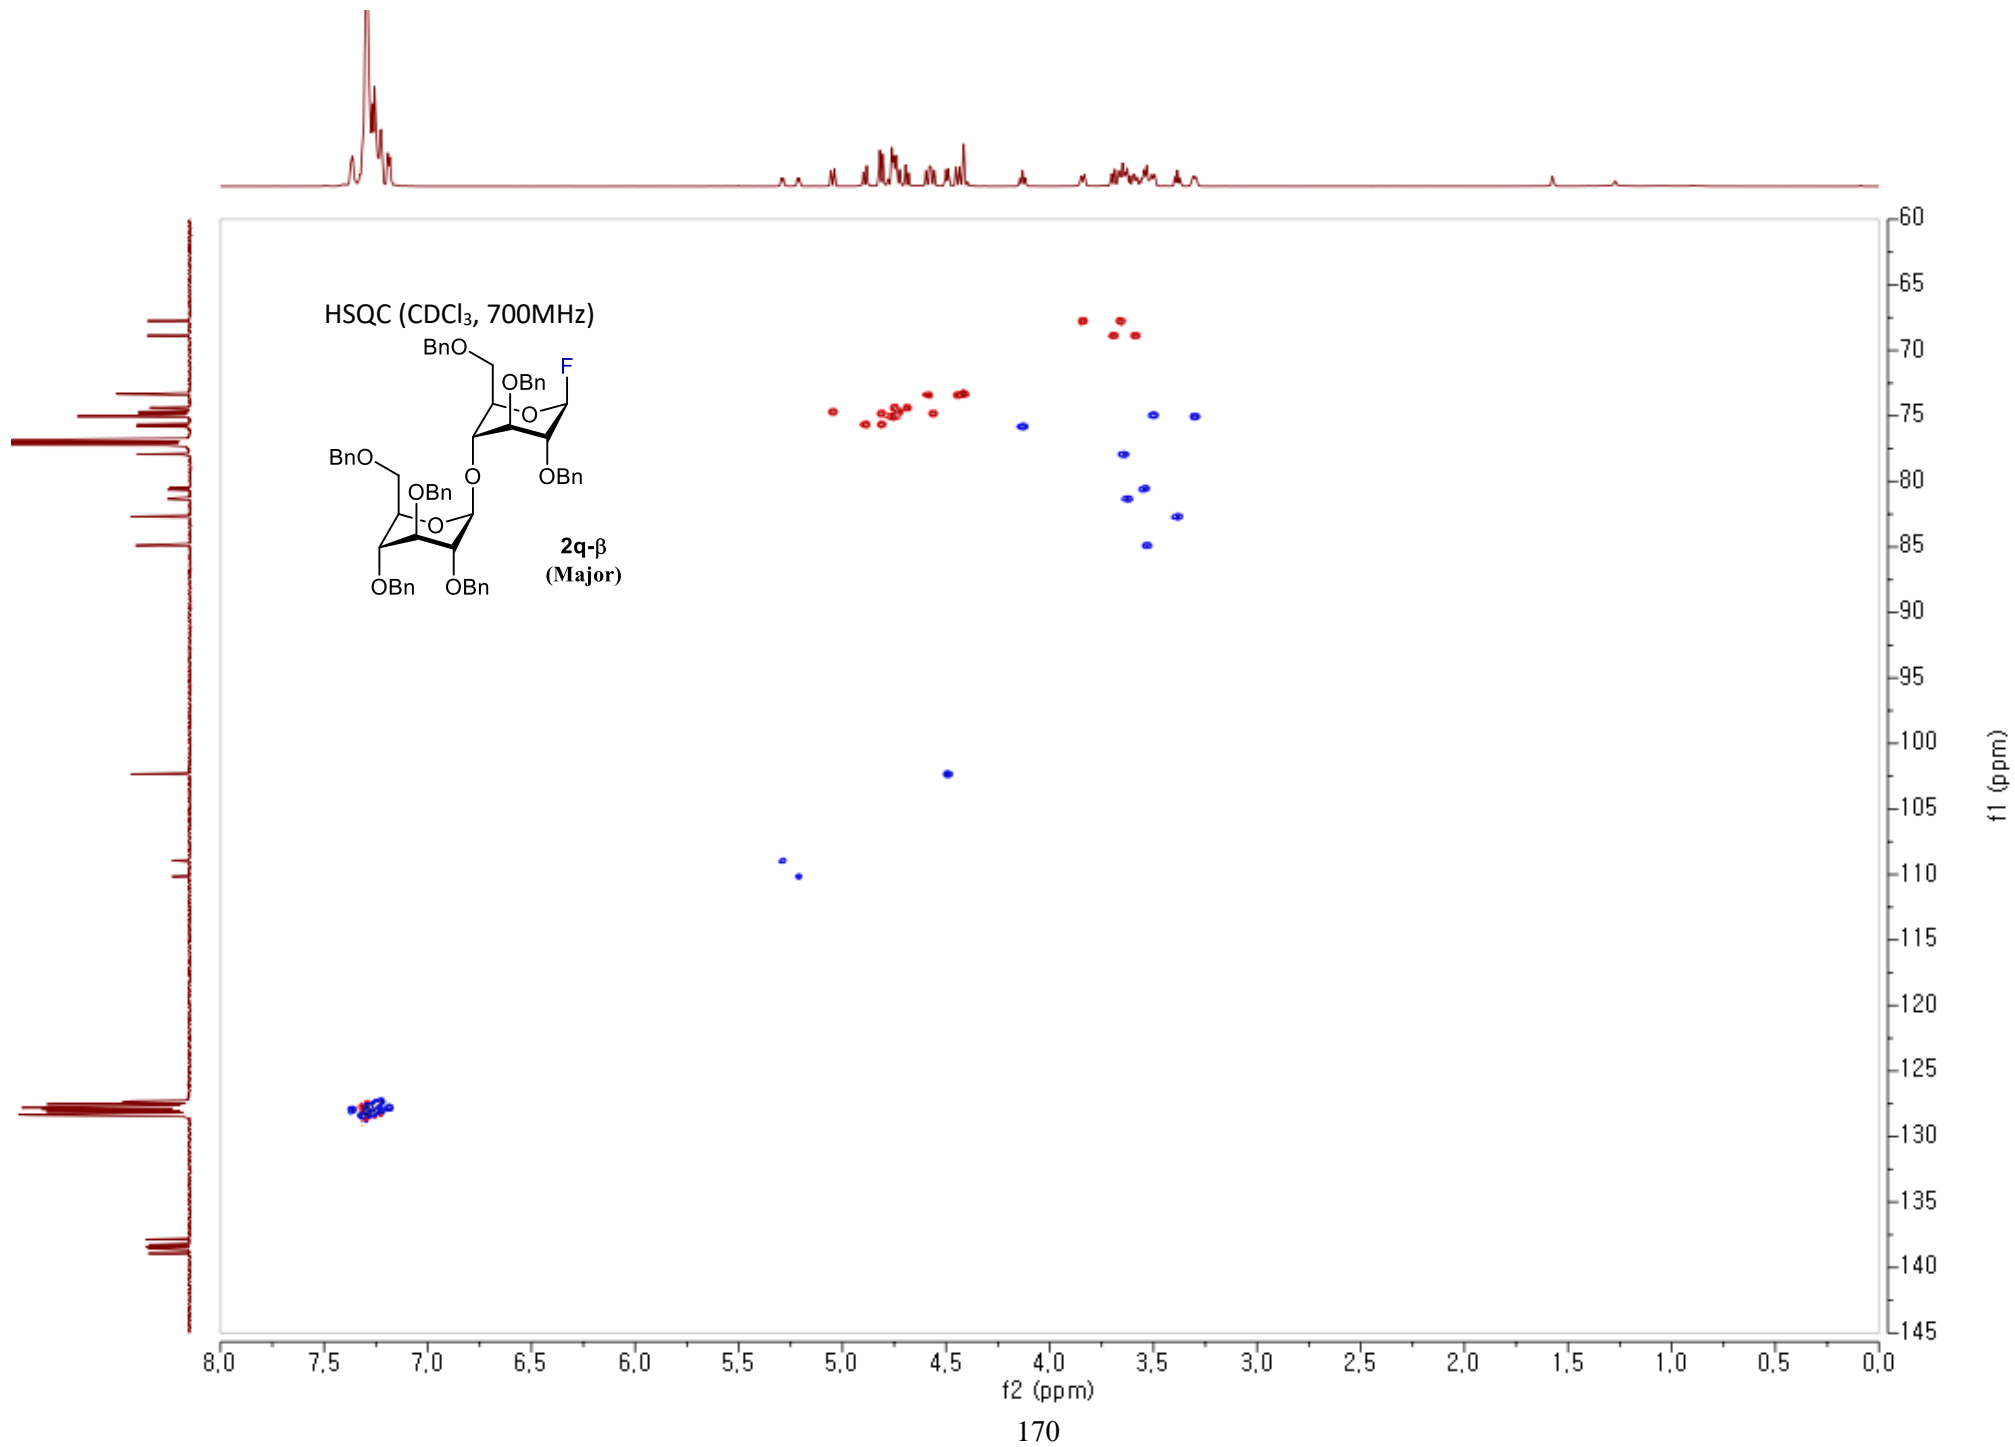

2,3,6-Tris-O-(phenylmethyl)-4-O-[2,3,4,6-tetrakis-O-(phenylmethyl)-β-D-glucopyranosyl]-α-D-glucopyranosyl fluoride (2q-α, Minor diastereomer)

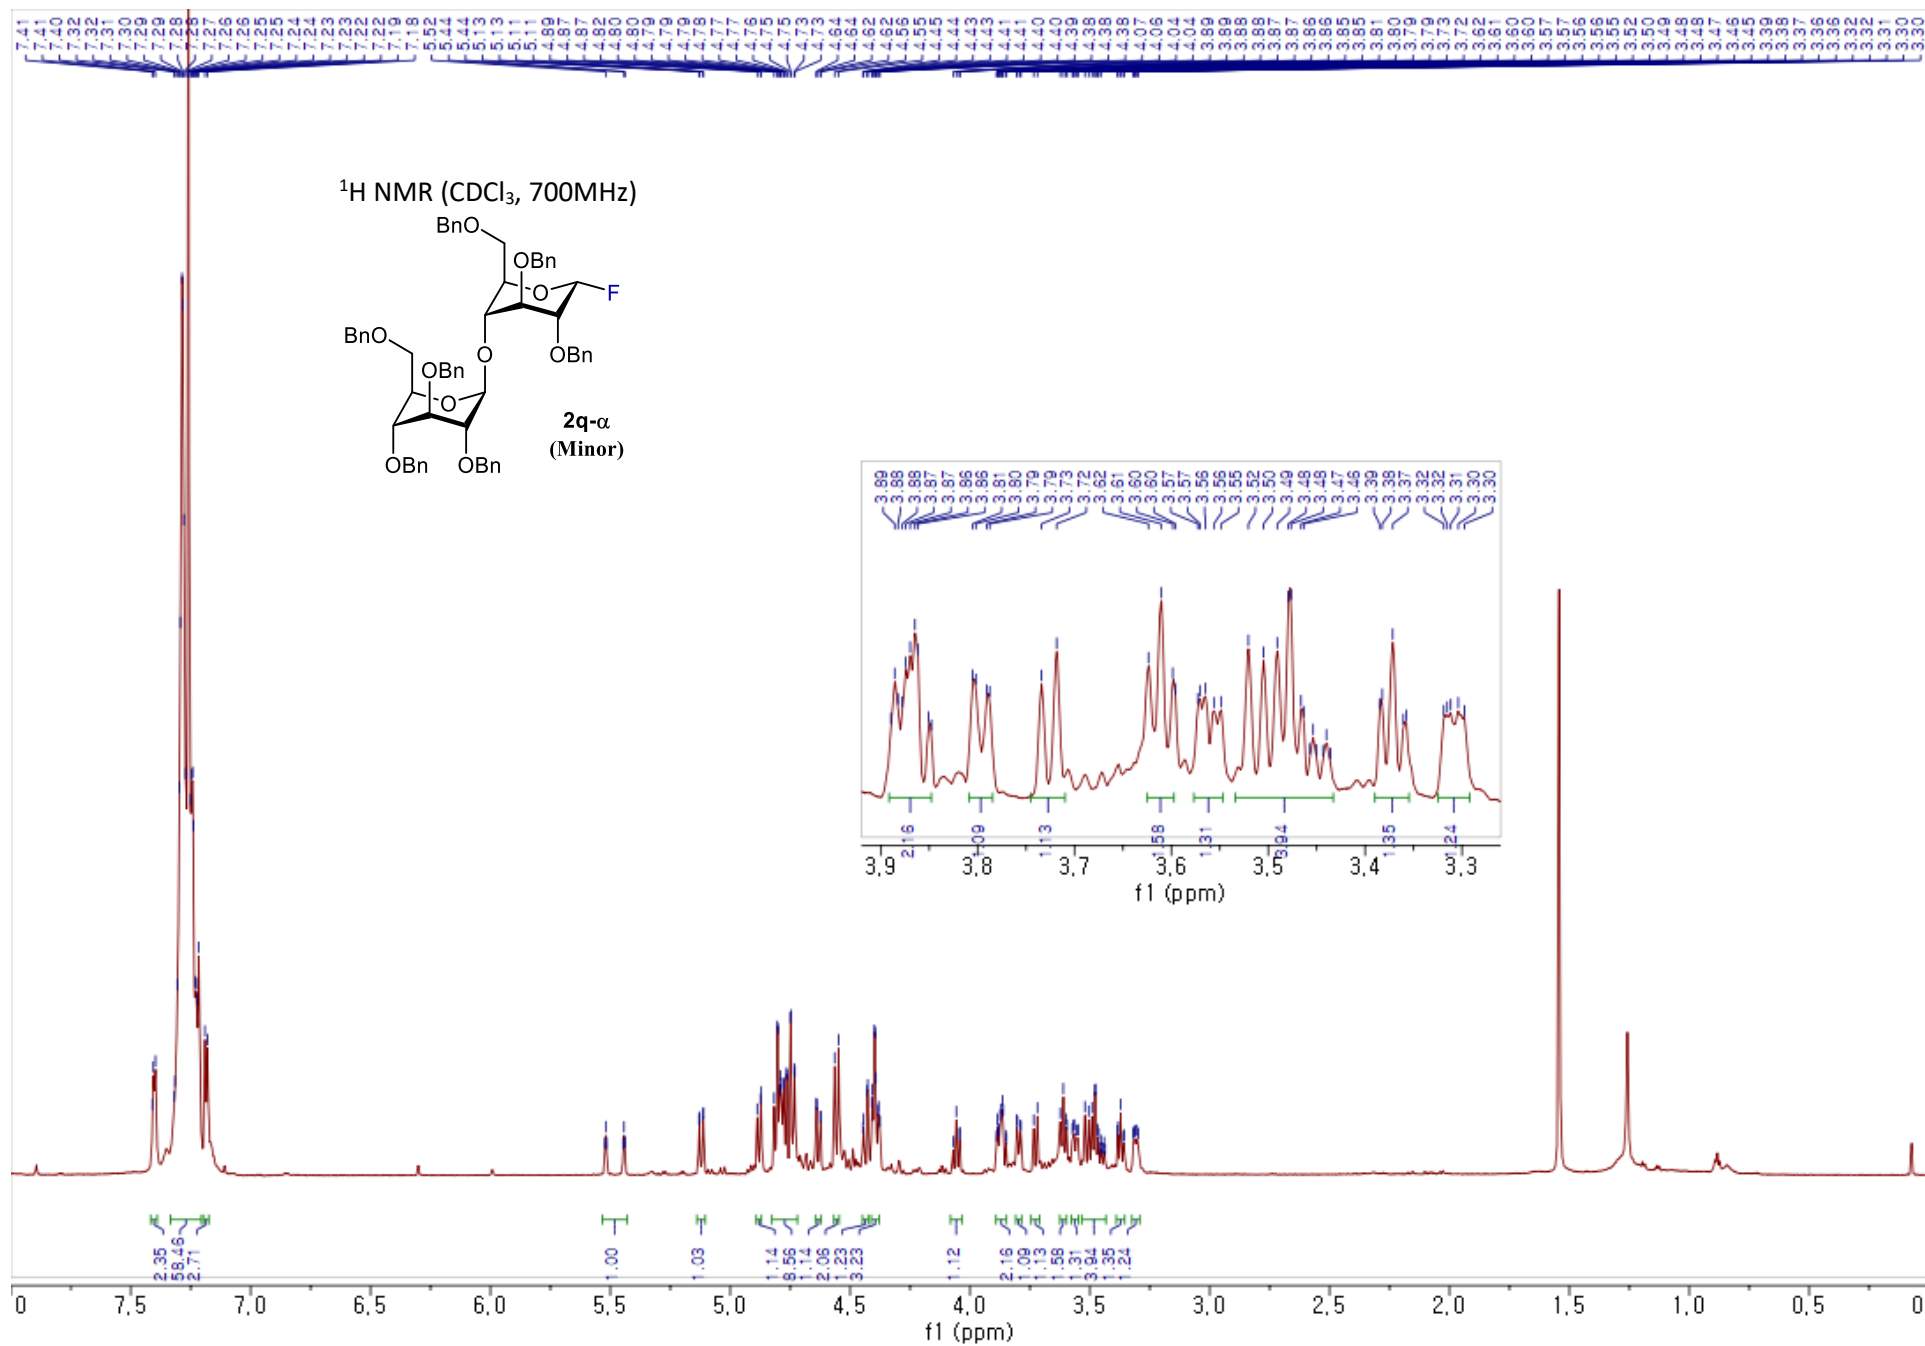



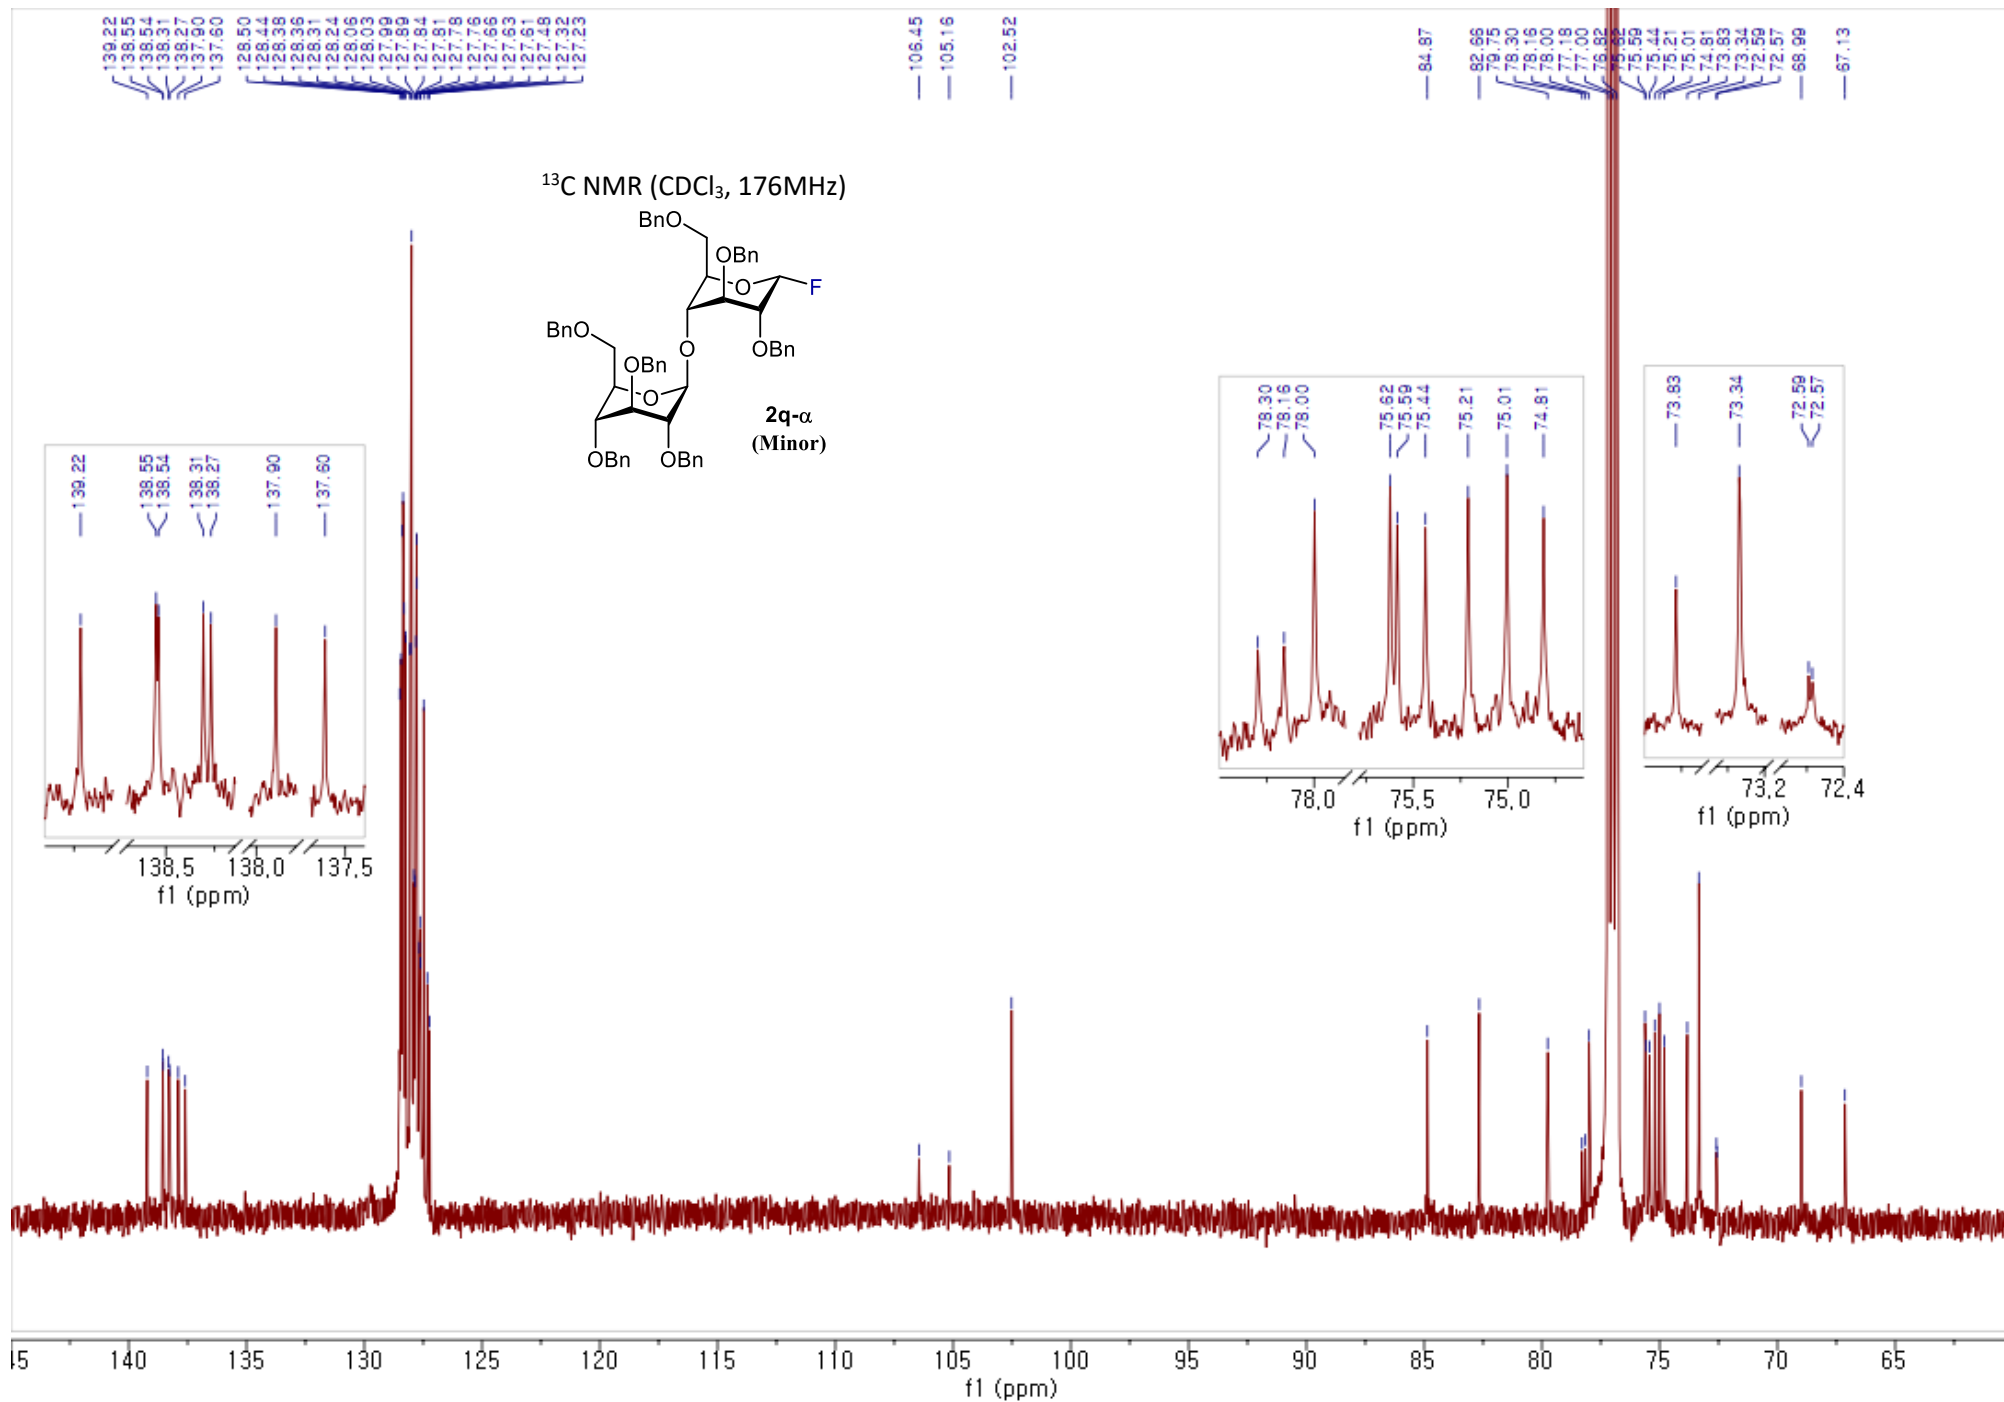

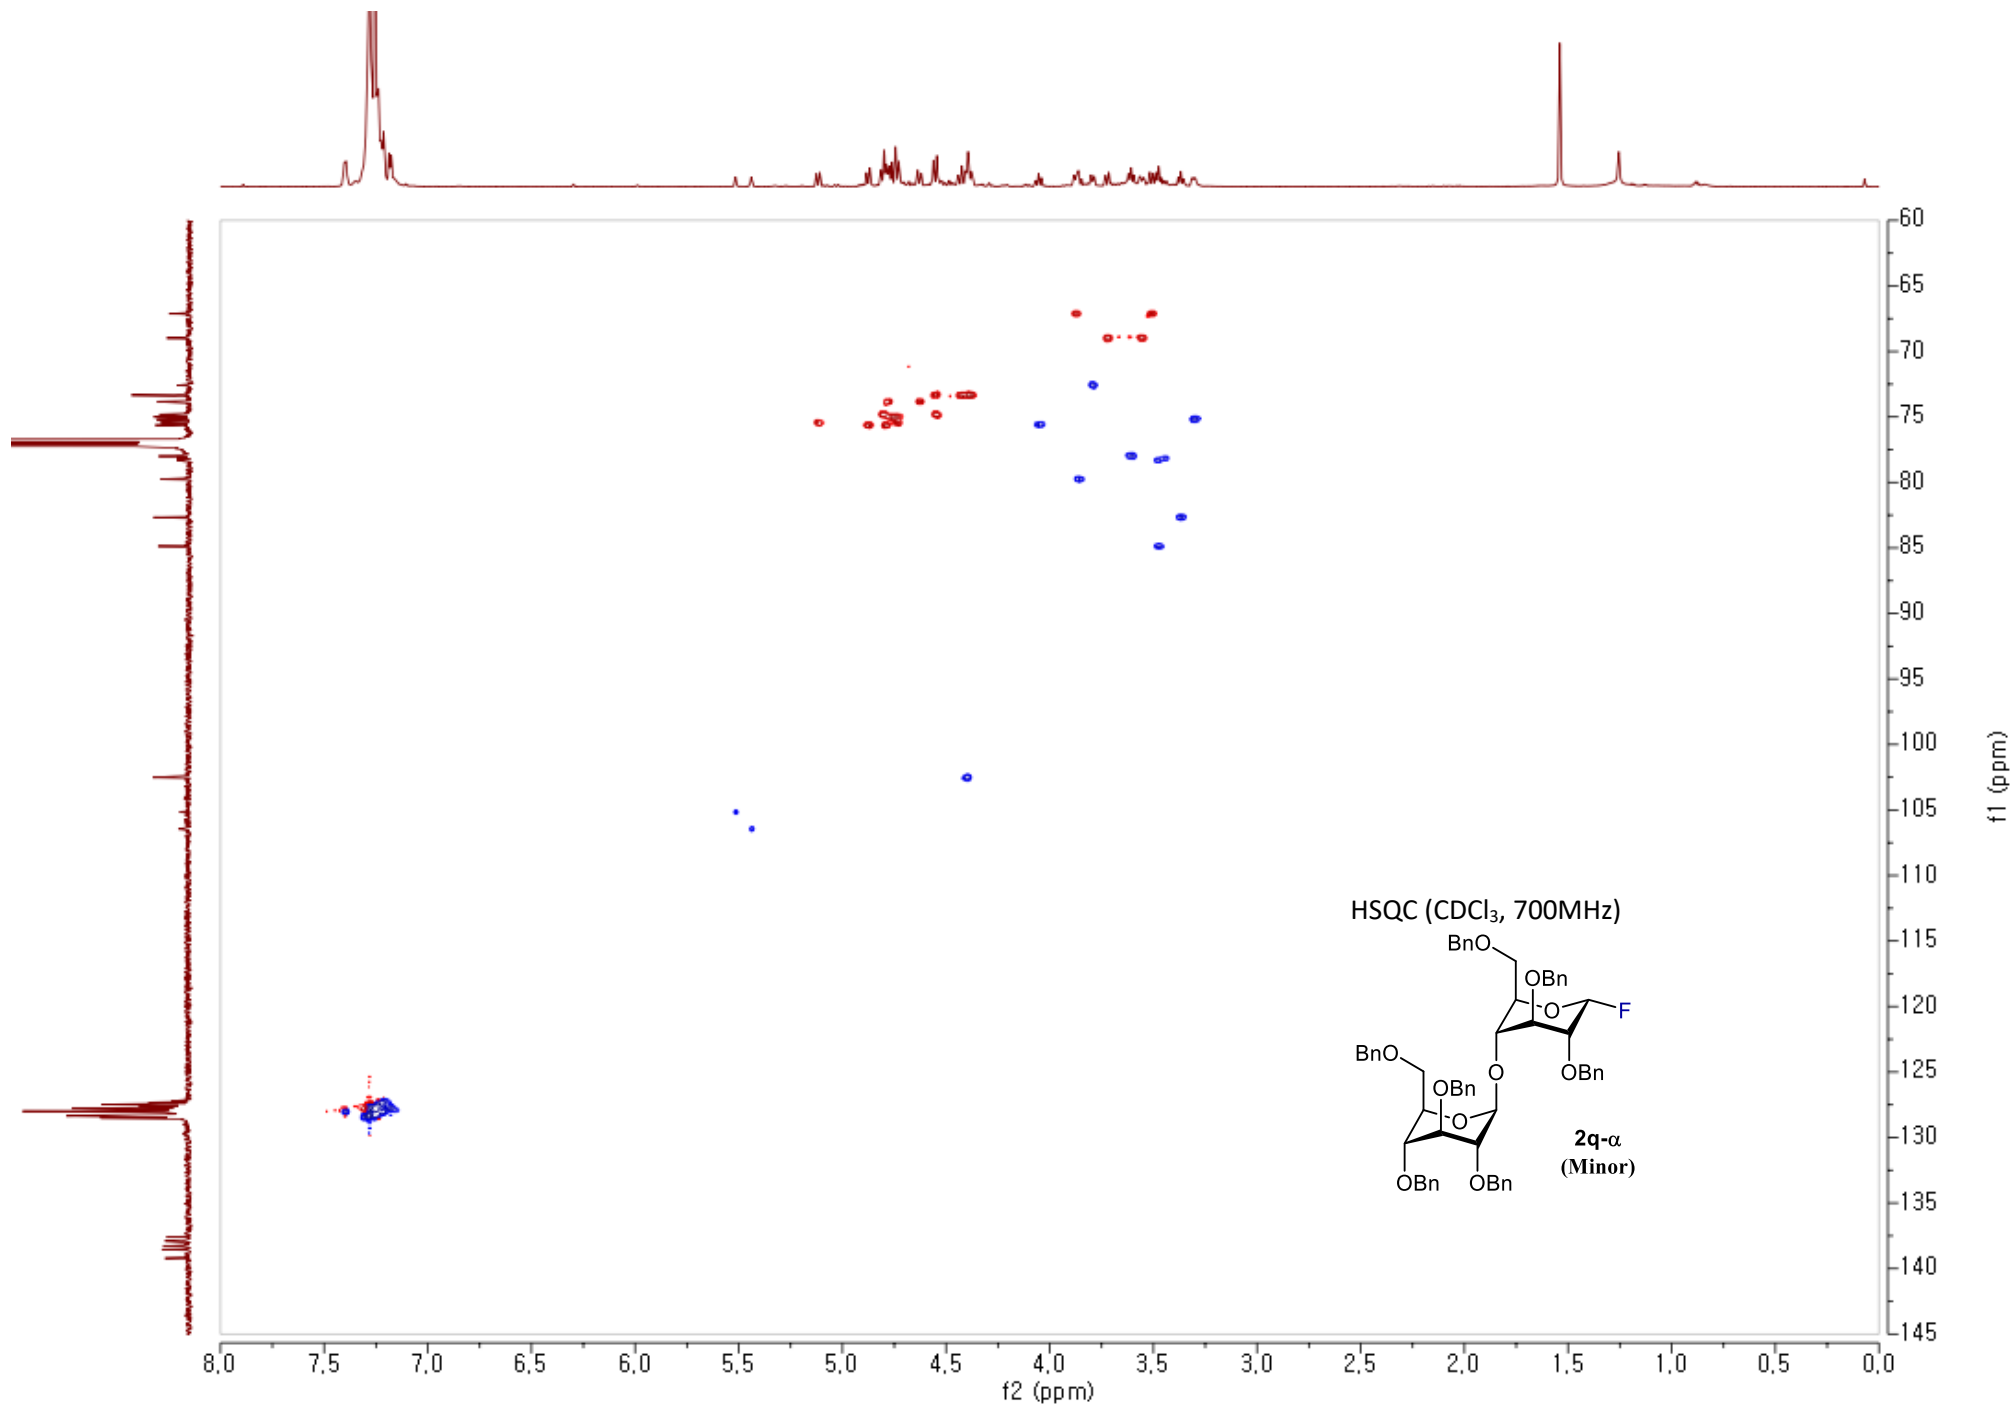

After Work-Up  
 $^{19}\text{F}$  NMR ( $\text{CDCl}_3$ , 564 MHz)

135.78  
135.81  
135.88  
135.90

149.49  
149.53  
149.58  
149.63

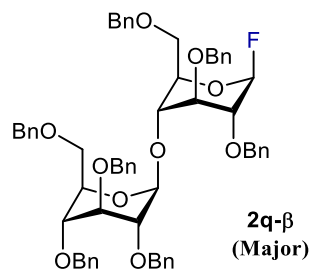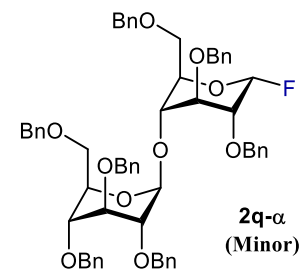

3.25

1.00

30 -131 -132 -133 -134 -135 -136 -137 -138 -139 -140 -141 -142 -143 -144 -145 -146 -147 -148 -149 -150 -151 -152 -153 -154 -1

f1 (ppm)

After Purification

$^{19}\text{F}$  NMR ( $\text{CDCl}_3$ , 564 MHz)

135.73  
135.70  
135.69  
135.62  
135.58

149.43  
149.48  
149.52  
149.57

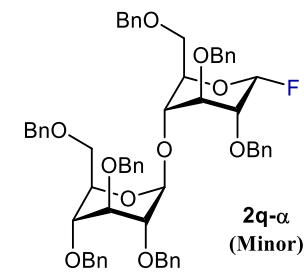

3.11

1.00

30 -131 -132 -133 -134 -135 -136 -137 -138 -139 -140 -141 -142 -143 -144 -145 -146 -147 -148 -149 -150 -151 -152 -153 -154 -1

f1 (ppm)

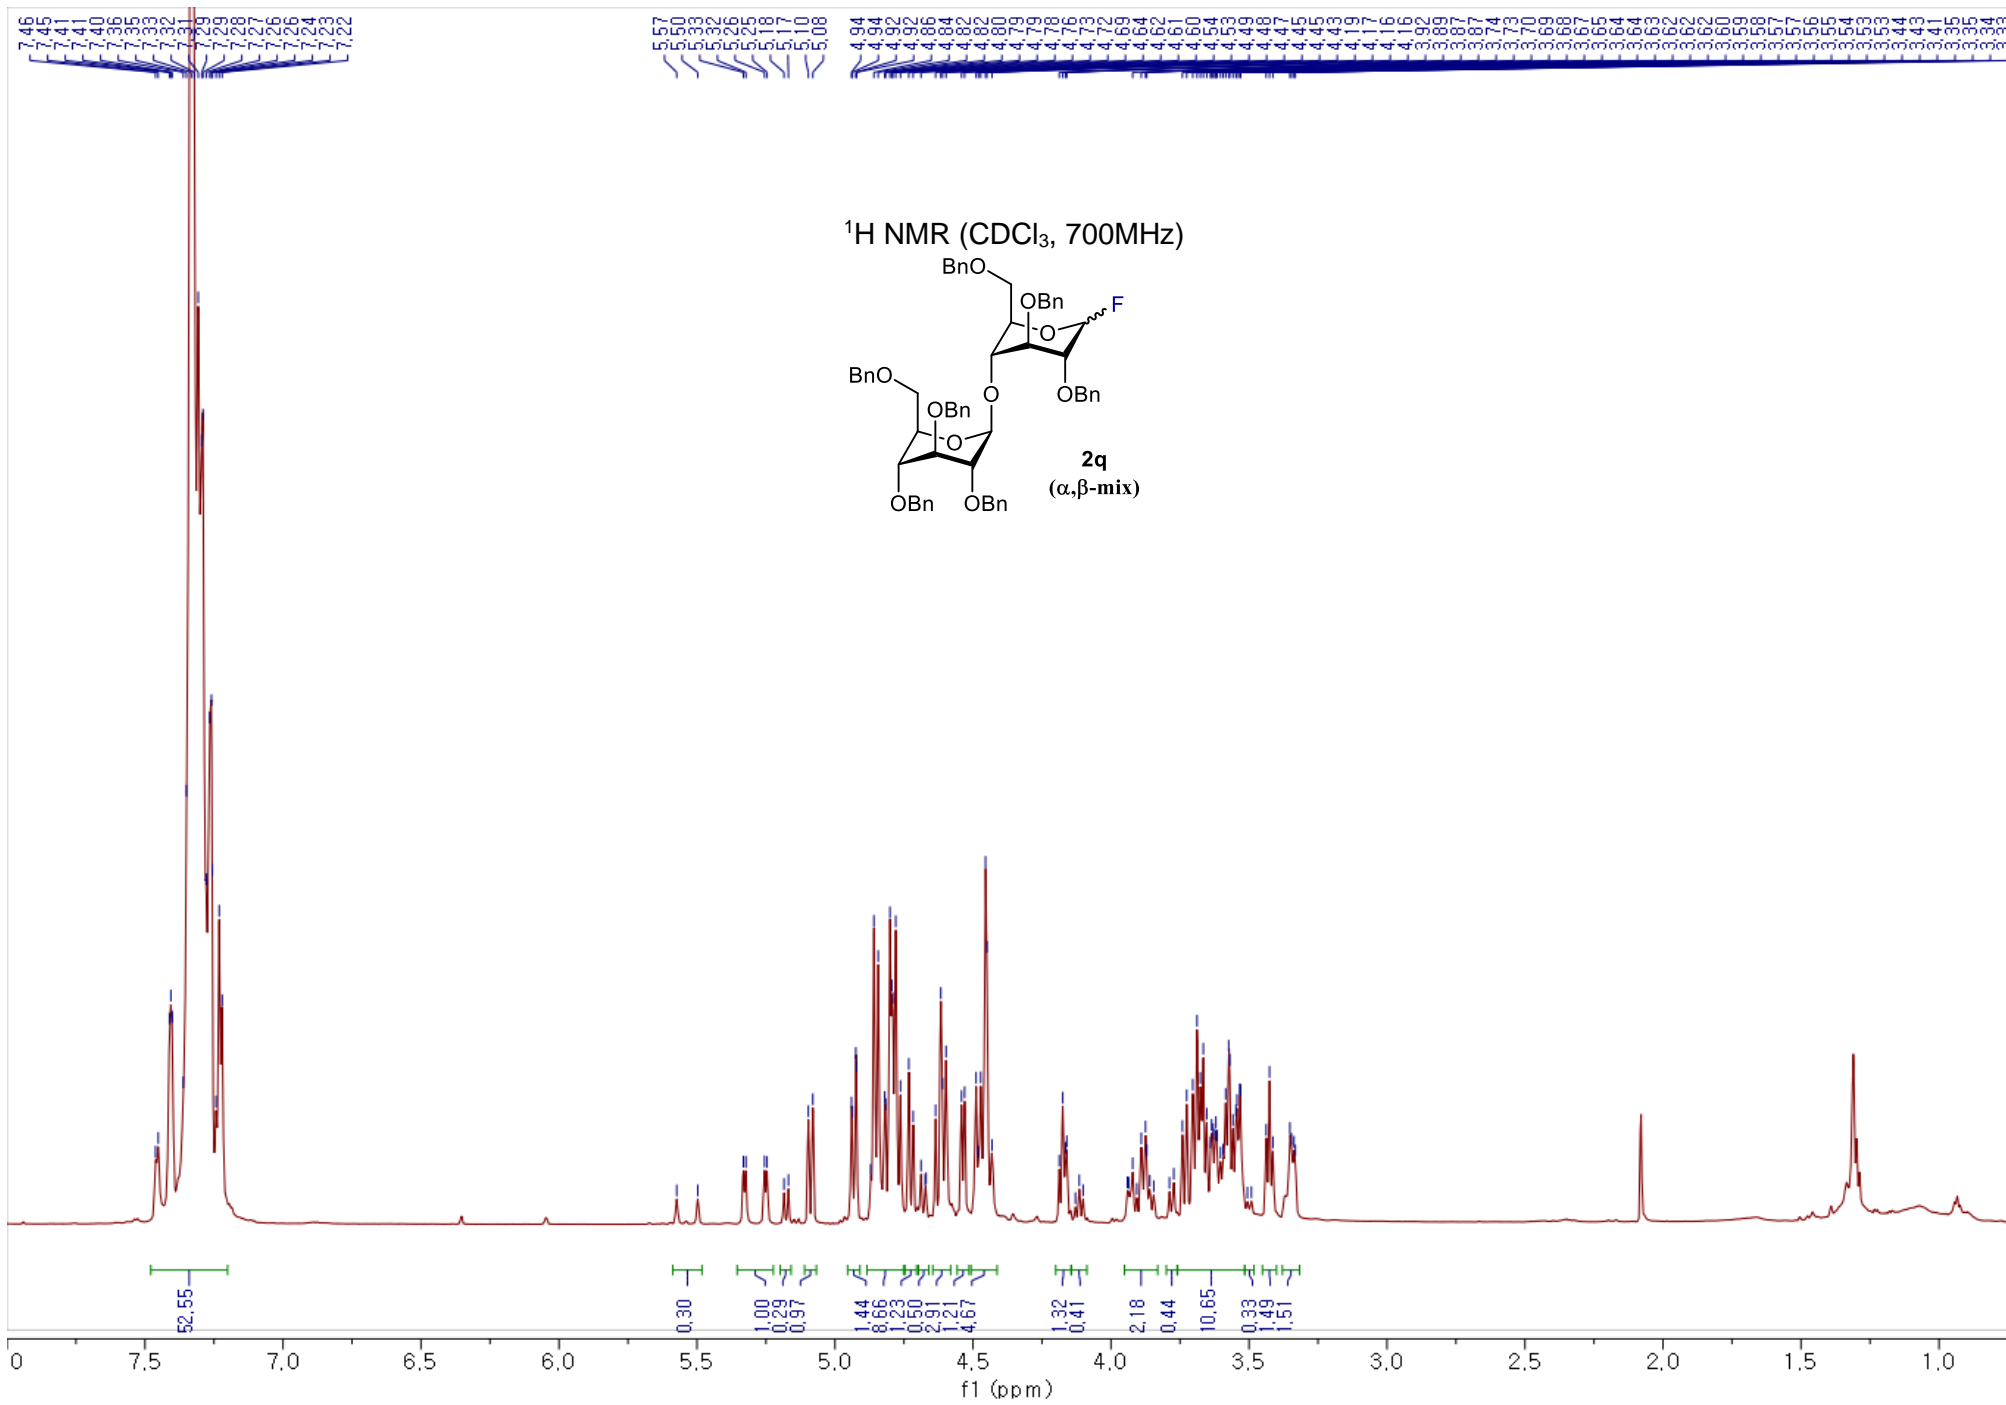

Supplement: NIHMS1932267-supplement-SI.pdf [file NIHMS1932267-supplement-SI.pdf]
